# Supplementary material for: WITHDRAWN: Resistance exercise-induced skeletal muscle damage is mitigated by adaptation-dependent changes in protein localization and phosphorylation
Source: Research Square preprint supplement (doi:10.21203/rs.3.rs-4344887/v1), 2025-08-20
Supplement: Supplementary file 1 [file 95991644e8a79e96d1fa2f51.xlsx]

## Sheet: Table S1_Cohort statistics
Subject	Sex	Age	Height (cm)	Weight (kg)	BMI
1*	M	30	188	82	23.2005
2	M	25	186	82	23.7022
3	M	20	183	75.5	22.5447
4	M	21	183	70	20.9024
5	M	29	187	90	25.7371
6	M	23	179	89	27.7769
7	M	21	182	82	24.7555
8*	F	24	153	53	22.6409
Mean	7 M/ 1F	24.125	180.125	77.9375	23.9075
SD		3.72012	11.3444	12.0013	2.14053
Mean*	6 M	23.1667	183.333	81.4167	24.2365
SD*		3.37145	2.87518	7.70984	2.42155
* Subjects subsequently excluded from analysis of proteome data.

## Sheet: Table S2_Exercise regime
Exercise	Training		Standardized Mechanical Overload (SMO)
	Reps	Sets	Reps		Sets
Leg Extension	4	1	4		2
	8	1	8	(+4/4*)	2	(+1*)
	16	1	16		2
Leg Press	4	1	4		2
	8	1	8	(+4/4*)	2	(+1*)
Drop Jumps	10	1	10		2
Downstairs Walks	182 stairs	1	182 stairs		2
* Concentric phase of the third set was performed with both legs, excentric phase alternately with one leg

## Sheet: TableS3_Pellet_SMO_vs_Rest
Genes	Protein.Ids	First.Protein.Description	-Log 10 p-value (S1/R1)_Pellet	Log 2 Fold change (S1/R1)_Pellet	Pie Value (S1/R1)_Pellet	Significant (S1/R1)_Pellet	-Log 10 p-value (S3/R3)_Pellet	Log 2 Fold change (S3/R3)_Pellet	Pie Value (S3/R3)_Pellet	Significant (S3/R3)_Pellet	-Log 10 p-value (S4/R4)_Pellet	Log 2 Fold change (S4/R4)_Pellet	Pie Value (S4/R4)_Pellet	Significant (S4/R4)_Pellet	GOBP slim name	GOCC slim name	KEGG name	M05_R1_Pel	M05_S1_Pel	M05_R3_Pel	M05_S3_Pel	M05_R4_Pel	M05_S4_Pel	M08_R1_Pel	M08_S1_Pel	M08_R3_Pel	M08_S3_Pel	M08_R4_Pel	M08_S4_Pel	M02_R1_Pel	M02_S1_Pel	M02_R3_Pel	M02_S3_Pel	M02_R4_Pel	M02_S4_Pel	M04_R1_Pel	M04_S1_Pel	M04_R3_Pel	M04_S3_Pel	M04_R4_Pel	M04_S4_Pel	M09_R1_Pel	M09_S1_Pel	M09_R3_Pel	M09_S3_Pel	M09_R4_Pel	M09_S4_Pel	M03_R1_Pel	M03_S1_Pel
A2M	P01023	Alpha-2-macroglobulin	1.26063	0.432179	0.544816		0.102017	-0.0770475	-0.00786012		0.162443	0.0784963	0.0127512		biological regulation;cell activation;cell differentiation;cellular component disassembly;cellular component organization;cellular process;coagulation;developmental process;establishment of localization;exocytosis;extracellular matrix organization;extracellular structure organization;macromolecule metabolic process;metabolic process;multicellular organismal process;primary metabolic process;prote…	cell part;cytosol;extracellular organelle;extracellular region;organelle;vesicle	Complement and coagulation cascades	15.9647	17.294	16.9709	17.1479	16.2696	16.4673	16.7804	16.4303	16.0806	16.6428	16.845	16.945	16.6938	16.8738	17.176	17.4339	16.3706	16.2973	16.3985	16.7947	16.5973	16.3719	15.9704	16.1804	16.3394	16.6978	16.6587	15.8988	15.9933	15.9322	16.7366	17.416
AAMDC	Q9H7C9	Mth938 domain-containing protein	0.274866	0.100815	0.0277107		0.0476356	0.0279697	0.00133235		0.536582	-1.14115	-0.612321		biological regulation	cell part;cytoplasm		15.9622	15.7514	15.9258	15.4501	15.5967	16.1487	16.1757	16.2277	16.3179	15.7543	16.0973	15.2553	15.5998	15.7737	15.706	16.276	16.0841	16.0496	15.6918	15.7258	15.6246	15.6802	15.2744	15.4715	15.3759	15.6736	15.042	15.5249	15.8159	NaN	15.9295	16.1875
ABCA1	O95477	Phospholipid-transporting ATPase ABCA1	0.124665	0.36812	0.0458918		0.447822	0.53241	0.238425		0.136195	0.442228	0.0602294		alcohol metabolic process;biological regulation;cell communication;cellular component assembly;cellular component organization;cellular lipid metabolic process;cellular membrane organization;cellular metabolic process;cellular process;endosome transport;establishment of localization;homeostatic process;lipid metabolic process;lipid transport;macromolecular complex assembly;macromolecule metabolic…	cell part;cytoplasmic membrane-bounded vesicle;Golgi apparatus;intracellular membrane-bounded organelle;intracellular organelle;macromolecular complex;membrane;organelle;plasma membrane;vesicle	ABC transporters;Fat digestion and absorption	14.6626	14.8334	14.5042	14.8534	15.017	14.4883	15.1148	13.6376	14.888	14.1731	14.4985	14.4552	14.7861	15.0173	15.0647	15.1896	15.2305	14.9679	NaN	14.7204	NaN	14.8469	NaN	14.7604	14.6356	NaN	14.7783	14.8524	NaN	NaN	NaN	14.5549
ABCB10	Q9NRK6	ATP-binding cassette sub-family B member 10, mitochondrial	0.658557	0.301364	0.198465		0.386569	-0.204424	-0.0790239		0.349482	-0.389287	-0.136049		cellular process;establishment of localization;transmembrane transport;transport	cell part;membrane	ABC transporters	10.9826	10.7709	11.3678	11.4075	11.0664	11.7517	11.1928	11.1309	11.7013	11.1694	11.8866	11.9337	11.6794	11.5796	11.6577	10.4219	10.7081	10.8054	NaN	12.0666	NaN	11.7941	11.3521	NaN	NaN	11.3539	11.4975	11.3717	NaN	NaN	11.2877	11.851
ABCB6	Q9NP58	ATP-binding cassette sub-family B member 6	0.281435	0.607107	0.170861		1.07079	-0.284061	-0.304168		0.596431	0.303878	0.181243		anatomical structure development;biological regulation;biosynthetic process;cellular homeostasis;cellular ion homeostasis;cellular metabolic process;cellular nitrogen compound metabolic process;cellular process;cofactor metabolic process;cofactor transport;developmental process;establishment of localization;heterocycle metabolic process;homeostatic process;metabolic process;nitrogen compound meta…	ATP-binding cassette (ABC) transporter complex;cell part;endoplasmic reticulum;endosome;extracellular organelle;Golgi apparatus;intracellular membrane-bounded organelle;intracellular organelle;macromolecular complex;membrane;mitochondrial envelope;mitochondrion;organelle;plasma membrane;protein complex;vesicle	ABC transporters	14.8866	15.2508	15.3136	15.0178	14.8506	14.9353	15.2137	15.1931	14.7695	15.175	14.6337	15.9796	14.8189	14.4869	15.101	14.6579	14.6993	14.9932	NaN	NaN	14.9726	14.6233	14.5538	14.3247	NaN	15.1943	15.1816	14.9684	14.6042	15.3514	14.6065	14.8884
ABCF1	Q8NE71	ATP-binding cassette sub-family F member 1	0.28085	0.0490575	0.0137778		0.155722	-0.0798337	-0.0124318		0.460204	0.134806	0.0620381		biological regulation;biosynthetic process;cellular metabolic process;cellular process;establishment of localization;macromolecule metabolic process;metabolic process;primary metabolic process;protein metabolic process;regulation of translation;response to stimulus;response to stress;translation;translational initiation;transmembrane transport;transport	cell part;cytoplasm;cytosol;intracellular non-membrane-bounded organelle;intracellular organelle;macromolecular complex;membrane;nuclear envelope;nucleoplasm;organelle;ribonucleoprotein complex;ribosome		14.3469	14.3072	14.4352	14.2699	14.0242	14.5745	14.3241	14.3148	13.9528	14.5109	14.6211	14.7049	14.1391	14.4762	13.9441	13.9621	14.4007	14.1064	14.4865	14.3482	14.6406	14.4347	14.2966	14.4759	14.1504	14.5133	15.1329	14.3855	14.3967	14.3816	14.4356	14.2171
ABLIM1	O14639	Actin-binding LIM protein 1	0.562539	0.242155	0.136221		0.236139	-0.154807	-0.0365559		0.867936	0.637324	0.553157		anatomical structure formation involved in morphogenesis;anatomical structure morphogenesis;biological regulation;cellular component assembly;cellular component organization;cellular process;cytoskeleton organization;developmental process;locomotion;multicellular organismal process;neurological system process;organelle organization;response to chemical stimulus;response to external stimulus;respo…	cell part;cell projection;cytoplasm;cytoskeleton;intracellular non-membrane-bounded organelle;intracellular organelle;organelle	Axon guidance	14.8247	14.8157	15.3432	15.1694	14.9262	14.8461	14.7341	14.5334	14.8859	14.7371	14.7623	17.0617	14.4035	14.6616	14.5416	14.6731	14.6634	14.8751	15.3175	15.5472	15.6236	15.5282	14.5619	15.587	14.4982	15.2686	15.6729	15.0992	15.2997	15.5242	14.4794	14.8837
ABLIM2	Q6H8Q1	Actin-binding LIM protein 2	0.502724	-0.082441	-0.0414451		1.34015	-0.169832	-0.2276		1.2373	0.251505	0.311188		biological regulation;biosynthetic process;cellular component organization;cellular metabolic process;cellular nitrogen compound metabolic process;cellular process;cytoskeleton organization;locomotion;macromolecule metabolic process;metabolic process;nitrogen compound metabolic process;nucleobase-containing compound metabolic process;organelle organization;primary metabolic process;response to ch…	cell part;cytoskeleton;intracellular non-membrane-bounded organelle;intracellular organelle;organelle	Axon guidance	16.3813	16.2296	16.5173	16.3134	16.4529	16.3302	16.6238	16.6728	16.7817	16.5448	16.3157	17.0804	16.4867	16.5388	16.559	16.5286	16.4873	16.9348	16.6925	16.342	16.5214	16.3444	16.4613	16.6346	16.5535	16.4806	16.4408	16.5146	16.3822	16.4849	16.5489	16.5282
ABLIM3	O94929	Actin-binding LIM protein 3	0.116256	-0.397707	-0.046236		0.412559	1.25051	0.515908		0.356957	-0.971022	-0.346614		anatomical structure formation involved in morphogenesis;biological regulation;biosynthetic process;cellular component assembly;cellular component organization;cellular metabolic process;cellular nitrogen compound metabolic process;cellular process;cytoskeleton organization;developmental process;locomotion;macromolecule metabolic process;metabolic process;nitrogen compound metabolic process;nucle…	cell part;cell projection;cytoplasm	Axon guidance	16.0145	15.2329	15.8411	15.8964	15.7775	15.714	15.9974	NaN	NaN	15.9588	15.2731	15.433	15.0656	NaN	15.9444	15.869	15.2365	NaN	NaN	15.1215	15.3473	NaN	15.478	15.6579	NaN	15.6414	16.0746	15.914	16.0285	15.1433	14.7051	14.3818
ABRA	Q8N0Z2	Actin-binding Rho-activating protein	1.23511	0.563745	0.696288		1.74087	0.647338	1.12693	+	0.645519	1.33417	0.86123		biological regulation;biosynthetic process;cellular metabolic process;cellular nitrogen compound metabolic process;cellular process;establishment of localization;macromolecule metabolic process;metabolic process;nitrogen compound metabolic process;nucleobase-containing compound metabolic process;primary metabolic process;protein transport;RNA metabolic process;transport	cell part;cytoskeleton;intracellular non-membrane-bounded organelle;intracellular organelle;membrane;organelle;plasma membrane		14.4953	15.2638	15.1823	15.0061	15.3876	15.6348	15.3483	15.9868	14.8516	15.843	14.5941	13.8287	15.4245	15.7873	15.4056	15.4456	14.5305	15.077	14.7951	15.28	14.3068	15.443	14.8905	15.0768	14.769	16.1781	14.4586	15.9966	NaN	15.4712	15.9155	15.6342
ACAA1	P09110	3-ketoacyl-CoA thiolase, peroxisomal	0.0709251	0.0403474	0.00286164		0.420924	-0.142493	-0.0599788		0.00603243	-0.00318416	-1.92082e-05		catabolic process;cellular ketone metabolic process;cellular lipid metabolic process;cellular metabolic process;cellular process;lipid metabolic process;metabolic process;organic acid metabolic process;primary metabolic process;small molecule metabolic process	cell part;intracellular membrane-bounded organelle;intracellular organelle;membrane;microbody;organelle;peroxisome	Benzoate degradation;Biosynthesis of unsaturated fatty acids;Fatty acid metabolism;Peroxisome;PPAR signaling pathway;Valine, leucine and isoleucine degradation	13.568	13.8999	14.037	13.9125	13.6907	13.7178	13.9013	13.9547	14.2548	14.1895	13.9988	14.2757	14.7513	14.3415	14.0953	14.4144	13.9402	14.5556	14.0319	14.4672	14.1906	14.1877	14.0286	14.0805	13.99	14.3188	14.6412	13.5861	14.2883	13.4788	14.6226	14.1249
ACAA2	P42765	3-ketoacyl-CoA thiolase, mitochondrial	0.42347	0.157315	0.066618		0.293435	0.129102	0.0378831		0.669732	-0.162045	-0.108527		alcohol metabolic process;biosynthetic process;cellular ketone metabolic process;cellular lipid metabolic process;cellular metabolic process;cellular process;lipid metabolic process;metabolic process;organic acid metabolic process;primary metabolic process;response to chemical stimulus;response to stimulus;response to stress;small molecule metabolic process	cell part;extracellular organelle;intracellular membrane-bounded organelle;intracellular organelle;membrane;mitochondrion;organelle;vesicle	Benzoate degradation;Fatty acid elongation in mitochondria;Fatty acid metabolism;Valine, leucine and isoleucine degradation	16.19	16.2558	16.1611	16.1062	16.3571	16.2722	16.3198	16.5445	16.5904	16.6129	16.4676	16.1851	17.0521	17.0408	16.9337	16.9803	16.8613	16.2512	16.4221	16.8171	16.9415	16.984	16.4309	16.5457	16.4781	16.8004	16.2667	16.6933	16.4767	16.0439	16.7773	16.7245
ACAD9	Q9H845	Complex I assembly factor ACAD9, mitochondrial	1.12506	-0.41954	-0.472007		0.132496	0.121639	0.0161167		0.0804571	0.0697136	0.00560895		cellular component assembly;cellular component organization;cellular macromolecular complex assembly;cellular process;macromolecular complex assembly;protein complex assembly;protein complex biogenesis	cell part;cell projection;intracellular membrane-bounded organelle;intracellular organelle;mitochondrion;neuron projection;nucleus;organelle	Geraniol degradation;Naphthalene degradation	11.4588	10.9611	11.0679	11.4858	11.1298	10.7451	NaN	NaN	NaN	10.664	NaN	10.9634	11.6541	11.1333	10.3519	11.3641	10.7998	11.2753	10.8097	NaN	11.0808	NaN	9.85484	11.5801	11.6436	11.4841	11.5688	10.4224	11.8366	NaN	NaN	11.3385
ACADM	P11310	Medium-chain specific acyl-CoA dehydrogenase, mitochondrial	0.258819	0.102685	0.0265768		0.852002	0.22309	0.190074		0.376779	-0.144107	-0.0542963		amine metabolic process;biosynthetic process;catabolic process;cellular amino acid metabolic process;cellular ketone metabolic process;cellular lipid metabolic process;cellular metabolic process;cellular nitrogen compound metabolic process;cellular process;lipid metabolic process;metabolic process;nitrogen compound metabolic process;organic acid metabolic process;primary metabolic process;small m…	cell part;cell projection;extracellular organelle;intracellular membrane-bounded organelle;intracellular organelle;mitochondrion;neuron projection;nucleus;organelle;vesicle	beta-Alanine metabolism;Fatty acid metabolism;PPAR signaling pathway;Propanoate metabolism;Valine, leucine and isoleucine degradation	18.2943	18.4125	18.02	18.3193	18.3231	18.4511	18.0499	18.1312	18.1397	18.2976	18.183	17.6272	19.0352	18.7403	18.5979	18.9606	18.7225	18.6587	18.4419	18.651	18.5723	18.6235	18.4426	18.4867	18.4079	18.7881	18.2193	18.5979	18.6322	18.1568	18.3799	18.5021
ACADS	P16219	Short-chain specific acyl-CoA dehydrogenase, mitochondrial	0.488486	0.174223	0.0851052		0.212137	0.141841	0.0300897		0.0298271	-0.0151823	-0.000452845		catabolic process;cellular component assembly;cellular component organization;cellular ketone metabolic process;cellular lipid metabolic process;cellular metabolic process;cellular process;lipid metabolic process;macromolecular complex assembly;metabolic process;organic acid metabolic process;primary metabolic process;protein complex assembly;response to chemical stimulus;response to endogenous s…	cell part;intracellular membrane-bounded organelle;intracellular organelle;membrane;mitochondrion;nucleus;organelle	Butanoate metabolism;Fatty acid metabolism;Valine, leucine and isoleucine degradation	16.0151	16.0618	15.4354	15.7148	15.9972	16.1353	16.0593	16.0862	16.0378	16.1099	15.9794	15.6171	16.6501	16.6049	16.7464	16.8988	16.595	16.4551	16.2681	16.7034	16.756	16.8085	16.0355	16.5223	16.4717	16.7727	16.1173	16.2076	16.5461	16.1311	16.0171	16.2977
ACADSB	P45954	Short/branched chain specific acyl-CoA dehydrogenase, mitochondrial	0.724011	-0.236496	-0.171226		0.244671	-0.287526	-0.0703492		0.322014	0.452778	0.145801		amine metabolic process;catabolic process;cellular amino acid metabolic process;cellular ketone metabolic process;cellular lipid metabolic process;cellular metabolic process;cellular nitrogen compound metabolic process;cellular process;lipid metabolic process;metabolic process;nitrogen compound metabolic process;organic acid metabolic process;primary metabolic process;small molecule metabolic pro…	cell part;extracellular organelle;intracellular membrane-bounded organelle;intracellular organelle;mitochondrion;organelle;vesicle	Fatty acid metabolism;Valine, leucine and isoleucine degradation	13.3057	13.2148	13.4081	13.076	13.4446	13.5204	13.2223	12.4972	12.689	NaN	NaN	12.4561	13.7203	13.2497	13.607	13.2996	13.3578	13.2398	13.5014	13.3255	13.0795	13.1847	13.4264	13.2971	13.0018	13.1607	12.6998	14.0001	13.2176	13.2862	13.0554	12.94
ACADVL	P49748	Very long-chain specific acyl-CoA dehydrogenase, mitochondrial	0.150251	0.0464102	0.00697319		0.267204	0.0859849	0.0229755		0.0269294	-0.00735188	-0.000197982		biological regulation;catabolic process;cell differentiation;cellular ketone metabolic process;cellular lipid metabolic process;cellular metabolic process;cellular process;developmental process;generation of precursor metabolites and energy;homeostatic process;lipid metabolic process;macromolecule metabolic process;metabolic process;multicellular organismal process;organic acid metabolic process;…	cell part;cytoplasm;intracellular membrane-bounded organelle;intracellular non-membrane-bounded organelle;intracellular organelle;membrane;mitochondrion;nucleolus;nucleus;organelle	Fatty acid metabolism	17.9616	17.8664	17.7588	18.0287	18.0184	18.1136	18.0253	17.9984	18.0303	17.9977	18.082	18.0942	18.4772	18.2442	18.309	18.3685	18.1895	18.156	18.1461	18.4644	18.4521	18.4896	18.057	18.2993	17.9261	18.2259	17.8763	18.0709	18.0779	17.644	18.2281	18.2435
ACAT1	P24752	Acetyl-CoA acetyltransferase, mitochondrial	0.332018	0.19815	0.0657892		0.330636	0.196334	0.0649149		0.755986	-0.38003	-0.287297		amine metabolic process;anatomical structure development;biosynthetic process;catabolic process;cellular amino acid metabolic process;cellular component assembly;cellular component organization;cellular ketone body metabolic process;cellular ketone metabolic process;cellular lipid metabolic process;cellular metabolic process;cellular nitrogen compound metabolic process;cellular process;developmen…	cell part;extracellular organelle;intracellular membrane-bounded organelle;intracellular organelle;membrane;mitochondrion;organelle;vesicle	Benzoate degradation;Butanoate metabolism;Carbon fixation pathways in prokaryotes;Fatty acid metabolism;Glyoxylate and dicarboxylate metabolism;Lysine degradation;Propanoate metabolism;Pyruvate metabolism;Synthesis and degradation of ketone bodies;Terpenoid backbone biosynthesis;Tryptophan metabolism;Two-component system;Valine, leucine and isoleucine degradation	16.5044	16.6493	16.6067	16.6301	16.8492	16.8237	17.1516	17.1721	17.4723	17.3326	17.518	16.4116	17.6976	17.8071	17.3952	17.9287	17.8934	17.6242	17.3416	17.6158	17.5251	17.6304	17.1984	17.2044	16.9585	17.3119	16.5876	17.1625	17.3176	16.4825	17.6018	17.8881
ACIN1	Q9UKV3	Apoptotic chromatin condensation inducer in the nucleus	0.500558	-0.184985	-0.0925959		0.265811	-0.0976451	-0.0259552		0.108303	-0.0649966	-0.0070393		biological regulation;cell death;cell differentiation;cellular component disassembly;cellular component organization;cellular metabolic process;cellular nitrogen compound metabolic process;cellular process;chromosome organization;death;developmental process;DNA metabolic process;DNA packaging;macromolecule metabolic process;metabolic process;mRNA metabolic process;mRNA processing;nitrogen compoun…	cell part;cytoplasm;cytosol;intracellular membrane-bounded organelle;intracellular non-membrane-bounded organelle;intracellular organelle;membrane;nucleolus;nucleoplasm;nucleus;organelle;plasma membrane	mRNA surveillance pathway;RNA transport;Spliceosome	13.2197	13.7316	13.5537	13.798	13.6938	13.0767	13.1188	13.4803	13.4151	13.2453	13.4021	14.3291	13.3684	13.139	12.9419	13.1326	13.2997	13.5161	13.9424	13.4243	13.6108	13.376	13.6888	12.9065	13.5326	13.0637	13.838	13.4629	13.1868	13.5301	13.7218	12.9549
ACO1	P21399	Cytoplasmic aconitate hydratase	0.169749	-0.0712295	-0.0120912		0.0205117	0.00791915	0.000162436		1.40321	-0.263094	-0.369176		biological regulation;catabolic process;cellular homeostasis;cellular ion homeostasis;cellular ketone metabolic process;cellular metabolic process;cellular process;cofactor metabolic process;developmental process;homeostatic process;metabolic process;multicellular organismal process;organic acid metabolic process;post-embryonic development;regulation of translation;response to chemical stimulus;r…	cell part;cytoplasm;cytosol;endoplasmic reticulum;extracellular organelle;Golgi apparatus;intracellular membrane-bounded organelle;intracellular organelle;mitochondrion;organelle;vesicle	Carbon fixation pathways in prokaryotes;Citrate cycle (TCA cycle);Glyoxylate and dicarboxylate metabolism	15.5589	15.1649	15.4071	15.5545	15.7922	15.7014	15.8274	15.6866	15.7132	15.7555	15.6844	15.5262	15.7108	15.9022	15.998	15.7968	15.6929	15.0278	15.75	15.6756	15.9685	15.9898	15.6681	15.6643	15.7189	16.0679	15.7151	15.5628	15.8151	15.2787	15.481	15.1224
ACO2	Q99798	Aconitate hydratase, mitochondrial	0.116913	0.0466194	0.00545041		0.212494	0.0635932	0.0135132		0.363736	-0.0985387	-0.0358421		catabolic process;cellular ketone metabolic process;cellular metabolic process;cellular process;cofactor metabolic process;generation of precursor metabolites and energy;metabolic process;organic acid metabolic process;small molecule metabolic process	cell part;intracellular membrane-bounded organelle;intracellular organelle;mitochondrion;nucleus;organelle	Carbon fixation pathways in prokaryotes;Citrate cycle (TCA cycle);Glyoxylate and dicarboxylate metabolism	18.9194	18.8018	18.7873	18.9521	19.0408	19.1663	18.8055	18.8712	19.0101	18.9785	18.8581	18.8149	19.5214	19.4191	19.3863	19.4919	19.3527	19.149	19.0533	19.1616	19.3055	19.2475	19.0837	19.1061	19.0608	19.3198	18.9656	19.0982	19.1256	18.5912	19.2971	19.3639
ACOT2	P49753	Acyl-coenzyme A thioesterase 2, mitochondrial	0.141334	0.162879	0.0230202		0.700655	1.22499	0.858299		0.546202	-0.920429	-0.50274		cellular ketone metabolic process;cellular lipid metabolic process;cellular metabolic process;cellular process;cofactor metabolic process;lipid metabolic process;metabolic process;organic acid metabolic process;primary metabolic process;small molecule metabolic process	cell part;extracellular organelle;intracellular membrane-bounded organelle;intracellular organelle;mitochondrion;organelle;vesicle	Biosynthesis of unsaturated fatty acids	14.872	15.3657	14.8691	15.529	15.3034	14.7465	15.1291	16.1395	15.1386	15.6069	14.8908	14.6679	16.2404	15.6967	15.5004	16.0448	15.8316	16.0105	14.4068	13.9916	14.4366	15.0642	15.099	14.9675	14.7361	15.4551	NaN	15.7016	15.1764	10.5282	16.2192	15.9323
ACOT9	Q9Y305	Acyl-coenzyme A thioesterase 9, mitochondrial	0.375218	0.099014	0.0371518		0.539996	0.141912	0.0766316		0.273057	0.0925021	0.0252583		cellular metabolic process;cellular process;cofactor metabolic process;metabolic process	cell part;intracellular membrane-bounded organelle;intracellular organelle;mitochondrion;organelle		14.5815	14.8122	14.4975	14.9304	14.6371	14.8634	14.6807	14.8166	14.9545	15.0016	15.0757	15.3964	15.1553	15.0061	14.6898	14.9802	14.7973	14.7367	14.6444	14.7689	14.9519	14.746	14.6969	14.8888	14.9117	15.2089	14.9677	14.9232	14.9723	14.8152	14.7161	14.671
ACSL1	P33121	Long-chain-fatty-acid--CoA ligase 1	0.0402176	-0.0160125	-0.000643984		0.130774	0.0399488	0.00522427		0.949639	-0.217585	-0.206627		biological regulation;biosynthetic process;catabolic process;cellular ketone metabolic process;cellular lipid metabolic process;cellular metabolic process;cellular process;cofactor metabolic process;glycerol ether metabolic process;lipid metabolic process;metabolic process;organic acid metabolic process;primary metabolic process;regulation of protein modification process;response to chemical stim…	cell part;intracellular membrane-bounded organelle;intracellular organelle;membrane;microbody;mitochondrion;organelle;plasma membrane	Adipocytokine signaling pathway;Fatty acid metabolism;Peroxisome;PPAR signaling pathway	17.0325	16.9106	16.9119	16.9821	16.9884	17.205	17.1402	17.093	17.3349	17.3336	17.2353	16.9381	17.6765	17.5054	17.4984	17.486	17.3079	17.0376	17.2696	17.4364	17.436	17.4195	17.3773	17.1761	17.3077	17.3529	17.0521	17.2564	17.2082	16.5152	17.5045	17.5368
ACSL3	O95573	Fatty acid CoA ligase Acsl3	0.518687	-0.323742	-0.167921		0.0521852	-0.0342654	-0.00178814		0.448875	-0.4204	-0.188707		anatomical structure development;biological regulation;biosynthetic process;cellular component assembly;cellular component organization;cellular ketone metabolic process;cellular lipid metabolic process;cellular metabolic process;cellular process;cofactor metabolic process;developmental process;glycerol ether metabolic process;lipid metabolic process;macromolecular complex assembly;metabolic proc…	cell part;endoplasmic reticulum;Golgi apparatus;intracellular membrane-bounded organelle;intracellular organelle;lipid particle;membrane;microbody;organelle	Adipocytokine signaling pathway;Fatty acid metabolism;Peroxisome;PPAR signaling pathway	13.5238	12.7835	13.5247	13.8132	13.852	14.071	14.4759	14.0471	14.343	13.6681	14.0832	14.5698	13.3262	13.4689	13.5436	14.0082	13.8637	13.5691	14.271	13.8758	14.2741	13.9862	14.538	NaN	14.1744	13.9572	13.4823	13.8574	13.8781	13.7848	14.5323	14.2289
ACSS1	Q9NUB1	Acetyl-coenzyme A synthetase 2-like, mitochondrial	0.449656	-0.499817	-0.224745		0.00509499	-0.010509	-5.35433e-05		0.117709	0.194839	0.0229344		alcohol metabolic process;biosynthetic process;cellular ketone metabolic process;cellular metabolic process;cellular process;cofactor metabolic process;metabolic process;organic acid metabolic process;small molecule metabolic process;xenobiotic metabolic process	cell part	Carbon fixation pathways in prokaryotes;Glycolysis / Gluconeogenesis;Methane metabolism;Propanoate metabolism;Pyruvate metabolism	13.8756	NaN	NaN	13.1815	NaN	NaN	13.8935	13.4459	13.3834	13.8767	13.7284	NaN	14.0819	14.0737	13.9964	14.0418	13.4407	13.0231	14.2507	13.957	14.4183	13.6526	NaN	13.1358	13.3	13.6788	14.0025	14.3191	14.1499	14.7011	13.0937	13.4373
ACTA1	P68133	Actin, alpha skeletal muscle	0.509362	-0.127256	-0.0648193		0.0684683	0.0195402	0.00133788		0.061245	-0.025897	-0.00158606		anatomical structure development;cell development;cell growth;cellular component movement;cellular component organization;cellular process;cytoskeleton organization;developmental process;growth;multicellular organismal process;muscle adaptation;muscle contraction;organelle organization;response to abiotic stimulus;response to chemical stimulus;response to endogenous stimulus;response to external …	cell part;cytoskeleton;cytosol;extracellular organelle;extracellular space;intracellular non-membrane-bounded organelle;intracellular organelle;macromolecular complex;membrane;organelle;plasma membrane;protein complex;vesicle		25.5793	25.4308	25.2115	25.2413	25.4287	25.2677	25.6979	25.2221	25.5094	25.2969	25.1197	25.3523	24.9605	25.234	24.9671	25.0518	25.0152	24.6381	25.4983	25.2844	25.4781	25.3987	25.2381	25.636	25.5837	25.3325	25.08	25.3714	25.4521	25.1763	25.204	25.2565
ACTG2	P63267	Actin, gamma-enteric smooth muscle	0.323858	0.155972	0.0505129		0.282994	0.203231	0.0575132		0.554097	-0.32129	-0.178026		multicellular organismal process;muscle contraction	cell part;cytoskeleton;cytosol;extracellular organelle;extracellular space;intracellular non-membrane-bounded organelle;intracellular organelle;organelle;vesicle	Vascular smooth muscle contraction	18.9066	18.9871	19.7987	19.9508	20.1781	18.8073	18.9078	20.0489	18.9725	18.8459	18.8899	18.6639	18.6133	18.731	18.7373	18.495	18.6548	18.0627	18.9918	18.9678	18.9519	19.1671	18.7127	18.9799	19.0172	18.8305	18.1092	18.7856	18.6376	18.631	19.1549	18.9621
ACTN1	P12814	Alpha-actinin-1	0.255587	0.0833975	0.0213154		0.362084	-0.0971311	-0.0351696		0.859686	0.262657	0.225802		biological regulation;cell activation;cell junction organization;cellular component assembly;cellular component organization;cellular process;coagulation;cytoskeleton organization;establishment of localization;exocytosis;extracellular matrix organization;extracellular structure organization;multicellular organismal process;organelle organization;regulation of body fluid levels;secretion;transport…	cell part;cell projection;cytoplasm;cytoskeleton;cytosol;extracellular organelle;extracellular region;extracellular space;intracellular membrane-bounded organelle;intracellular non-membrane-bounded organelle;intracellular organelle;membrane;neuron projection;nucleus;organelle;plasma membrane;pseudopodium;vesicle	Adherens junction;Amoebiasis;Arrhythmogenic right ventricular cardiomyopathy (ARVC);Focal adhesion;Leukocyte transendothelial migration;Regulation of actin cytoskeleton;Systemic lupus erythematosus;Tight junction	19.7351	20.1012	19.6983	19.5154	19.7491	19.6099	19.634	19.6918	19.7594	19.515	19.5648	20.1901	19.6915	20.1983	19.6268	19.7289	19.7409	19.8996	20.1273	19.6228	19.7655	19.9184	19.6925	19.9549	19.7848	20.1791	20.1143	20.0409	20.1983	19.9747	20.0608	19.7406
ACTN2	P35609	Alpha-actinin-2	0.353517	-0.0489616	-0.0173088		0.204913	0.0391305	0.00801836		0.0249904	-0.00731405	-0.000182781		biological adhesion;biological regulation;cell activation;cell adhesion;cell communication;cell junction organization;cell-cell signaling;cellular component assembly;cellular component movement;cellular component organization;cellular homeostasis;cellular ion homeostasis;cellular process;coagulation;establishment of localization;exocytosis;homeostatic process;macromolecular complex assembly;multi…	cell part;cell projection;cytoskeleton;cytosol;extracellular organelle;extracellular region;filopodium;intracellular non-membrane-bounded organelle;intracellular organelle;macromolecular complex;neuron projection;organelle;protein complex;pseudopodium;vesicle	Adherens junction;Amoebiasis;Arrhythmogenic right ventricular cardiomyopathy (ARVC);Focal adhesion;Leukocyte transendothelial migration;Regulation of actin cytoskeleton;Systemic lupus erythematosus;Tight junction	24.767	24.7576	24.6868	24.6256	24.7497	24.7028	24.6822	24.7536	24.6462	24.703	24.5801	24.2843	24.8484	24.7875	24.735	24.6377	24.5499	24.6436	24.8891	24.7255	24.8235	24.7702	24.4998	24.9384	24.6314	24.5924	24.4715	24.8473	24.6082	24.3811	24.6323	24.5401
ACTN3	Q08043	Alpha-actinin-3	0.127678	-0.112908	-0.0144159		0.0404464	0.0389802	0.00157661		0.0523253	0.0425806	0.00222804		biological regulation;cell junction organization;cellular component assembly;cellular component movement;cellular component organization;cellular process	cell part;cell projection;cytosol;extracellular organelle;macromolecular complex;organelle;protein complex;pseudopodium;vesicle	Adherens junction;Amoebiasis;Arrhythmogenic right ventricular cardiomyopathy (ARVC);Focal adhesion;Leukocyte transendothelial migration;Regulation of actin cytoskeleton;Systemic lupus erythematosus;Tight junction	21.9182	21.9241	22.2915	21.6916	21.7125	21.9054	21.4658	21.8613	21.3593	21.049	21.3492	21.496	21.4197	22.1028	20.4104	21.5764	21.0363	21.4797	21.9799	20.1496	21.7338	22.1258	22.5548	22.3116	22.0613	21.8414	21.8531	22.0641	22.1153	22.0594	22.0063	22.2944
ACTN4	O43707	Alpha-actinin-4	0.263758	0.0896298	0.0236406		1.53325	-0.158756	-0.243413		0.615936	0.175249	0.107942		biological regulation;cell activation;cell junction organization;cellular component assembly;cellular component organization;cellular process;coagulation;cytoskeleton organization;establishment of localization;exocytosis;multicellular organismal process;organelle organization;protein transport;regulation of body fluid levels;regulation of transport;response to chemical stimulus;response to stimul…	cell part;cell projection;cytoplasm;cytoskeleton;extracellular organelle;extracellular region;extracellular space;intracellular membrane-bounded organelle;intracellular non-membrane-bounded organelle;intracellular organelle;macromolecular complex;neuron projection;nucleus;organelle;protein complex;pseudopodium;ribonucleoprotein complex;vesicle	Adherens junction;Amoebiasis;Arrhythmogenic right ventricular cardiomyopathy (ARVC);Focal adhesion;Leukocyte transendothelial migration;Regulation of actin cytoskeleton;Systemic lupus erythematosus;Tight junction	22.5444	22.8026	22.7213	22.5246	22.595	22.3045	22.3975	22.4141	22.662	22.4665	22.3229	22.8614	22.5625	22.86	22.6214	22.4442	22.6532	22.6079	22.8331	22.6649	22.5886	22.6851	22.2595	22.8463	22.0645	22.6093	22.8526	22.6943	22.6643	22.3984	22.6583	22.2474
ACTR1A	P61163	Alpha-centractin	0.673237	0.200932	0.135275		0.192674	0.0727873	0.0140242		0.403996	-0.226575	-0.0915351					14.0649	14.2083	14.008	13.8042	13.8266	13.9853	13.3013	14.0429	13.9714	13.9967	14.5838	14.7192	14.1326	14.0238	13.9965	14.3283	14.2819	13.4433	14.0832	14.0572	13.7557	13.5745	14.078	14.0877	13.5333	14.0843	13.3637	13.7792	13.995	13.1905	14.1342	14.0385
ACTR2	P61160	Actin-related protein 2	0.0173922	-0.0222556	-0.000387074		0.0849344	0.0559699	0.00475377		0.155318	-0.35135	-0.0545709		anatomical structure formation involved in morphogenesis;biological regulation;cell division;cellular component assembly;cellular component movement;cellular component organization;cellular localization;cellular process;cytokinesis;cytoskeleton organization;developmental process;establishment of localization;establishment or maintenance of cell polarity;immune system process;localization;locomoti…	cell part;cell projection;cytoplasm;cytoskeleton;cytosol;extracellular organelle;intracellular non-membrane-bounded organelle;intracellular organelle;macromolecular complex;membrane;organelle;protein complex;vesicle		12.9156	NaN	13.5168	13.8816	NaN	NaN	13.2786	NaN	13.8645	13.2623	13.5706	14.3512	NaN	13.8679	14.2449	13.7203	14.0158	13.2502	13.7607	13.2212	13.5229	13.9847	13.6518	14.0823	NaN	13.6628	12.6653	13.6128	14.2435	13.4702	13.8742	13.682
ACTR3	P61158	Actin-related protein 3	0.0594987	0.0206904	0.00123105		0.544817	-0.0867167	-0.0472447		0.995242	0.169894	0.169086		anatomical structure morphogenesis;biological regulation;cell division;cellular component morphogenesis;cellular component movement;cellular component organization;cellular localization;cellular process;cytokinesis;cytoskeleton organization;developmental process;establishment of localization;establishment or maintenance of cell polarity;immune system process;localization;locomotion;organelle loca…	cell part;cell projection;cytoskeleton;cytosol;extracellular organelle;intracellular non-membrane-bounded organelle;intracellular organelle;macromolecular complex;membrane;organelle;protein complex;synapse;vesicle		15.2686	15.5485	15.6158	15.6526	15.4732	15.4414	15.1831	15.2734	15.4701	15.307	15.3003	15.8487	15.2919	15.3267	15.5464	15.4752	15.4776	15.7945	15.6246	15.3377	15.4476	15.3258	15.3454	15.5292	15.6099	15.8636	15.6222	15.4737	15.6372	15.3594	15.6616	15.414
ACY1	Q03154	Aminoacylase-1	0.391844	0.787063	0.308406		0.469855	0.832819	0.391304		0.824066	-1.12892	-0.930303		amine metabolic process;cellular amino acid metabolic process;cellular ketone metabolic process;cellular metabolic process;cellular nitrogen compound metabolic process;cellular process;metabolic process;nitrogen compound metabolic process;organic acid metabolic process;primary metabolic process;small molecule metabolic process;xenobiotic metabolic process	cell part;cytosol;extracellular organelle;organelle;vesicle	Arginine and proline metabolism	15.6105	15.5144	15.3382	15.3168	15.6469	15.3545	15.3554	15.0406	15.4455	14.8933	15.37	15.3834	15.7974	15.4803	15.1452	15.6172	15.4452	15.8959	NaN	15.5545	NaN	15.3899	14.6756	NaN	15.5955	15.1324	14.9277	15.1482	15.7139	NaN	15.0106	15.4715
ACYP2	P14621	Acylphosphatase-2	0.139646	0.0717847	0.0100245		0.323565	0.11596	0.0375207		0.5489	-0.321253	-0.176335		cellular metabolic process;cellular process;metabolic process;phosphorus metabolic process	cell part;intracellular membrane-bounded organelle;intracellular organelle;mitochondrion;organelle	Aminobenzoate degradation;Pyruvate metabolism	17.3183	17.2597	16.9843	17.5684	17.2919	17.2391	17.4236	17.1455	17.4701	17.1835	17.3709	17.4897	17.3754	17.3791	17.3132	17.6685	17.4776	15.8362	17.8449	17.7892	17.9204	17.7835	17.5269	17.7646	17.6915	17.6509	17.1966	17.3739	17.6819	17.229	16.624	17.4841
ADH1B	P00325	All-trans-retinol dehydrogenase [NAD(+)] ADH1B	0.393128	0.202962	0.0797901		0.739907	-0.364425	-0.26964		0.251804	0.178993	0.0450712					12.8484	13.3067	14.1859	13.3108	13.389	12.5658	12.7062	12.5711	13.0881	12.852	12.1279	13.5279	12.9764	13.5743	13.1919	12.6847	13.6373	13.4074	13.2795	13.9675	12.9535	13.039	12.5589	13.4487	13.3592	13.4284	13.6461	13.1464	13.3075	13.261	13.5142	13.0538
ADH5	P11766	Alcohol dehydrogenase class-3	0.528237	0.207729	0.10973		0.466545	0.798721	0.372639		0.0908385	-0.0533527	-0.00484648		aging;alcohol metabolic process;biological regulation;catabolic process;cellular aldehyde metabolic process;cellular lipid metabolic process;cellular metabolic process;cellular process;developmental process;lipid metabolic process;macromolecule metabolic process;macromolecule modification;metabolic process;multicellular organismal process;peptidyl-amino acid modification;primary metabolic process…	cell part;extracellular organelle;intracellular membrane-bounded organelle;intracellular organelle;mitochondrion;nucleus;organelle;vesicle	Chloroalkane and chloroalkene degradation;Drug metabolism - cytochrome P450;Fatty acid metabolism;Glycolysis / Gluconeogenesis;Metabolism of xenobiotics by cytochrome P450;Methane metabolism;Naphthalene degradation;Retinol metabolism;Tyrosine metabolism	16.0514	16.3561	16.3439	16.7472	16.5644	16.0617	15.7044	16.3859	NaN	16.1537	16.106	16.5761	16.2036	15.9838	16.0076	16.1911	15.9623	15.7518	15.4269	16.1659	15.7264	15.7615	16.3798	16.4885	15.6136	15.8741	16.462	16.2193	15.4932	16.026	15.9488	15.4294
ADHFE1	Q8IWW8	Hydroxyacid-oxoacid transhydrogenase, mitochondrial	0.305769	-0.435481	-0.133157		0.239253	0.452855	0.108347		0.503353	-0.819278	-0.412386		cellular ketone metabolic process;cellular metabolic process;cellular process;establishment of localization;hydrogen transport;metabolic process;organic acid metabolic process;small molecule metabolic process;transport	cell part;intracellular membrane-bounded organelle;intracellular organelle;mitochondrion;organelle		NaN	NaN	NaN	NaN	12.1223	NaN	13.4764	13.4833	13.3263	13.5694	13.5221	13.2116	13.2143	13.3067	12.9042	13.8913	13.5112	12.7498	12.8672	13.4907	13.238	13.8173	NaN	NaN	13.0913	NaN	NaN	NaN	NaN	NaN	11.8926	NaN
ADIPOQ	Q15848	Adiponectin	0.0484335	0.102732	0.00497568		0.171727	0.256955	0.0441261		0.130697	-0.195948	-0.0256099		alcohol metabolic process;anatomical structure development;biological regulation;carbohydrate metabolic process;catabolic process;cell differentiation;cellular component assembly;cellular component organization;cellular homeostasis;cellular ion homeostasis;cellular ketone metabolic process;cellular lipid metabolic process;cellular localization;cellular membrane organization;cellular metabolic pro…	cell part;cell surface;endoplasmic reticulum;extracellular organelle;extracellular region;extracellular space;intracellular membrane-bounded organelle;intracellular organelle;organelle;vesicle	Adipocytokine signaling pathway;PPAR signaling pathway;Type II diabetes mellitus	14.0192	14.4906	14.2074	13.6022	13.3392	13.3117	12.5135	13.7401	13.9455	13.9262	13.3229	14.1823	12.656	NaN	NaN	13.8471	13.6009	13.6703	13.7198	13.5001	13.6823	13.1245	13.1452	13.7324	NaN	13.6171	13.5369	13.3436	13.1239	NaN	13.6451	NaN
ADPRHL1	Q8NDY3	Inactive ADP-ribosyltransferase ARH2	0.0269097	0.020031	0.000539028		0.0260978	0.0102231	0.0002668		0.464788	0.202521	0.0941291		cellular metabolic process;cellular process;macromolecule metabolic process;macromolecule modification;metabolic process;primary metabolic process;protein metabolic process;protein modification process			17.2768	17.1585	17.0919	17.1485	17.1205	17.0418	16.9947	17.2178	16.9895	16.8957	17.0773	17.5563	16.6718	16.5666	16.3152	16.7272	16.4712	16.7117	16.5772	16.9659	16.9236	16.8233	16.5638	17.0946	16.2503	15.807	16.7519	16.8241	16.5678	16.3337	16.5445	16.7198
ADPRS	Q9NX46	ADP-ribosylhydrolase ARH3	0.191694	0.515738	0.0988639		1.2488	1.77101	2.21163	+	0.744335	-1.14957	-0.855667		cellular process;response to chemical stimulus;response to oxidative stress;response to stimulus;response to stress	cell part;nucleoplasm		14.6079	NaN	NaN	13.8527	14.8133	13.9682	NaN	14.4197	NaN	14.4048	NaN	NaN	NaN	NaN	NaN	NaN	14.6731	NaN	NaN	13.4454	NaN	NaN	13.2462	NaN	13.7908	14.1879	NaN	NaN	14.5444	NaN	13.7707	13.3232
ADSL	P30566	Adenylosuccinate lyase	0.108637	-0.0217195	-0.00235954		0.358409	0.120331	0.0431276		0.674151	-0.205715	-0.138683		biosynthetic process;cellular aromatic compound metabolic process;cellular component assembly;cellular component organization;cellular metabolic process;cellular nitrogen compound metabolic process;cellular process;cellular respiration;generation of precursor metabolites and energy;heterocycle metabolic process;macromolecular complex assembly;metabolic process;nitrogen compound metabolic process;…	cell part;cytosol;intracellular membrane-bounded organelle;intracellular organelle;mitochondrion;organelle	Alanine, aspartate and glutamate metabolism;Purine metabolism	16.1365	16.1019	15.9324	16.0319	16.0528	16.146	15.9005	15.9804	15.795	15.748	15.9699	15.3766	15.9699	15.8914	15.7941	15.9546	16.0708	15.7267	15.9129	15.8895	15.7394	15.8496	15.905	16.1293	15.7376	15.7028	15.0598	15.4963	15.7852	15.2873	15.9093	15.8705
ADSS1	Q8N142	Adenylosuccinate synthetase isozyme 1	0.217967	-0.038868	-0.00847195		0.0469178	-0.0122801	-0.000576158		0.424918	-0.253322	-0.107641		amine metabolic process;biosynthetic process;cellular amino acid metabolic process;cellular aromatic compound metabolic process;cellular ketone metabolic process;cellular metabolic process;cellular nitrogen compound metabolic process;cellular process;heterocycle metabolic process;immune system process;metabolic process;nitrogen compound metabolic process;nucleobase-containing compound metabolic p…	cell part;cytoplasm;cytosol	Alanine, aspartate and glutamate metabolism;Purine metabolism	17.72	17.6909	17.9122	17.7269	17.7922	17.9832	17.8038	17.9156	17.6017	17.5193	17.6181	16.1479	17.7579	17.4822	17.571	17.5818	17.6417	17.6104	17.7044	17.6729	17.8877	17.8037	17.669	17.7528	17.6762	17.7441	17.4248	17.8047	17.74	17.451	17.9316	17.855
AFG3L2	Q9Y4W6	AFG3-like protein 2	0.0468055	-0.0379252	-0.00177511		0.704353	-0.253057	-0.178241		0.138531	0.0443854	0.00614875		anatomical structure development;anatomical structure morphogenesis;biological regulation;cell development;cellular component morphogenesis;cellular component organization;cellular membrane organization;cellular metabolic process;cellular process;death;developmental process;macromolecule metabolic process;membrane fusion;membrane organization;metabolic process;mitochondrion organization;organelle…	cell part;intracellular membrane-bounded organelle;intracellular organelle;membrane;mitochondrion;organelle		14.6862	13.2968	14.8348	14.2785	14.472	14.6332	14.5882	14.4015	14.329	14.2675	14.8832	14.8477	14.903	14.7372	14.9041	14.9384	14.3121	14.3617	14.3675	14.5491	14.8753	14.5125	14.3502	14.7466	14.5782	15.1994	14.2847	14.1141	14.8775	14.6344	14.0819	14.7934
AGL	P35573	Glycogen debranching enzyme	2.52565	-0.450761	-1.13846	+	2.42467	-0.198363	-0.480965		1.27957	-0.464735	-0.594661		alcohol metabolic process;biosynthetic process;carbohydrate metabolic process;catabolic process;cellular metabolic process;cellular process;energy reserve metabolic process;generation of precursor metabolites and energy;macromolecule metabolic process;metabolic process;polysaccharide metabolic process;primary metabolic process;response to chemical stimulus;response to endogenous stimulus;response…	cell part;cytoplasm;cytosol;endoplasmic reticulum;intracellular membrane-bounded organelle;intracellular organelle;isoamylase complex;macromolecular complex;nucleoplasm;organelle;protein complex	Starch and sucrose metabolism	20.2472	20.0019	20.1491	19.9553	20.1887	20.074	20.6015	19.9772	20.2233	19.8734	20.176	18.7436	19.9648	19.7794	19.9078	19.7973	20.0363	19.7027	20.1415	19.6788	20.1069	19.8678	20.0988	20.0993	20.5599	19.7214	20.0202	19.9774	20.2548	19.5067	20.1715	19.8231
AGRN	O00468	Agrin	0.249344	-0.135319	-0.0337411		0.159795	-0.0931837	-0.0148903		0.00877993	-0.00830253	-7.28956e-05		amine metabolic process;biological regulation;biosynthetic process;carbohydrate metabolic process;catabolic process;cellular component organization;cellular lipid metabolic process;cellular localization;cellular membrane organization;cellular metabolic process;cellular process;detection of stimulus;extracellular matrix organization;extracellular structure organization;lipid metabolic process;loca…	cell part;cell surface;cytoplasm;extracellular matrix;extracellular organelle;extracellular region;extracellular space;membrane;organelle;plasma membrane;synapse;vesicle	ECM-receptor interaction	13.3797	13.3499	13.4893	13.1706	13.4313	13.677	13.0453	12.5018	13.9024	13.4736	13.6748	14.4311	12.9764	13.593	13.215	12.8556	13.1576	12.4891	13.5125	12.6686	12.7657	13.7479	13.7397	13.0987	13.4189	13.7629	13.8784	13.779	14.2247	13.702	13.2966	12.9414
AGT	P01019	Angiotensinogen	0.176335	0.172428	0.0304052		0.724366	-0.326173	-0.236268		0.264185	-0.420742	-0.111154		aging;anatomical structure development;anatomical structure morphogenesis;behavior;biological adhesion;biological regulation;cell activation;cell adhesion;cell communication;cell development;cell differentiation;cell growth;cell proliferation;cell-cell signaling;cellular component organization;cellular homeostasis;cellular ion homeostasis;cellular lipid metabolic process;cellular metabolic proces…	cell part;cytoplasm;extracellular organelle;extracellular region;extracellular space;organelle;vesicle	Hypertrophic cardiomyopathy (HCM);Renin-angiotensin system;Vascular smooth muscle contraction	12.8222	14.0071	14.0484	13.4475	13.1814	13.6105	13.5461	13.1376	13.3792	13.339	13.7149	13.8582	12.5746	13.4773	13.6619	13.8935	13.5252	13.2645	13.8247	13.3034	13.4106	13.1976	13.3217	NaN	14.7396	13.6205	13.9517	12.8525	NaN	NaN	13.66	14.656
AHCY	P23526	Adenosylhomocysteinase	0.532253	0.797275	0.424352		2.39277	0.186153	0.445421		0.057276	0.0281835	0.00161424		amine metabolic process;cellular amino acid metabolic process;cellular ketone metabolic process;cellular metabolic process;cellular nitrogen compound metabolic process;cellular process;cofactor metabolic process;heterocycle metabolic process;metabolic process;nitrogen compound metabolic process;nucleobase-containing compound metabolic process;nucleobase-containing small molecule metabolic process…	cell part;cytoplasm;cytoplasmic membrane-bounded vesicle;cytosol;extracellular organelle;intracellular membrane-bounded organelle;intracellular organelle;organelle;vesicle	Cysteine and methionine metabolism	15.5493	15.7953	15.5477	15.7801	15.6869	15.6419	15.7388	15.784	15.5697	15.6929	15.921	16.293	15.7172	15.8373	15.7006	16.0002	15.6988	15.8911	15.3653	15.7763	15.5661	15.736	15.491	15.1732	15.7604	15.1583	15.6637	15.8044	15.4359	15.3532	NaN	15.9455
AHNAK	Q09666	Neuroblast differentiation-associated protein AHNAK	0.30013	-0.0604324	-0.0181376		1.24729	-0.197166	-0.245923		0.952184	0.298208	0.283949		biological regulation;cellular component assembly;cellular component organization;macromolecular complex assembly;protein complex assembly	cell part;cytoplasm;cytoskeleton;cytosol;extracellular organelle;intracellular membrane-bounded organelle;intracellular non-membrane-bounded organelle;intracellular organelle;membrane;nucleus;organelle;plasma membrane;vesicle		17.4095	17.4668	17.8655	17.5834	17.4879	17.5704	17.3409	17.5182	17.7287	17.5338	17.6046	18.6971	17.4819	17.3751	17.4559	17.4267	17.6177	17.8194	17.6508	17.3871	17.5672	17.3333	17.5835	17.6125	17.8703	17.601	17.9629	17.6929	17.6291	17.797	17.5258	17.5682
AIFM1	O95831	Apoptosis-inducing factor 1, mitochondrial	0.223841	-0.0440241	-0.00985441		0.0943261	0.0330245	0.00311507		0.37316	-0.0786638	-0.0293542		biological regulation;catabolic process;cell death;cell differentiation;cellular component assembly;cellular component organization;cellular homeostasis;cellular macromolecular complex assembly;cellular metabolic process;cellular nitrogen compound metabolic process;cellular process;chromosome organization;death;developmental process;DNA metabolic process;DNA packaging;homeostatic process;macromol…	cell part;cytosol;intracellular membrane-bounded organelle;intracellular organelle;membrane;mitochondrion;nucleus;organelle	Apoptosis	18.2527	18.1798	18.104	17.9986	18.1637	18.2053	18.1615	18.0717	18.1726	18.0844	18.1752	17.9489	18.4875	18.3856	18.38	18.4584	18.3441	18.1755	18.4402	18.3899	18.5954	18.5431	18.3394	18.5209	18.2176	18.3446	17.959	18.3992	18.3509	18.0368	18.469	18.3929
AK1	P00568	Adenylate kinase isoenzyme 1	0.0823825	0.0323664	0.00266643		0.000672674	0.000294685	1.98227e-07		0.0382942	0.0106185	0.000406628		biological regulation;biosynthetic process;cellular metabolic process;cellular nitrogen compound metabolic process;cellular process;heterocycle metabolic process;metabolic process;nitrogen compound metabolic process;nucleobase-containing compound metabolic process;nucleobase-containing small molecule interconversion;nucleobase-containing small molecule metabolic process;nucleotide metabolic proce…	cell part;cytoplasm;cytosol;extracellular organelle;membrane;organelle;plasma membrane;vesicle	Purine metabolism	20.7045	20.809	20.7496	20.794	20.7256	20.7121	20.9712	21.093	20.9225	20.6192	20.7203	21.1369	20.7121	20.5182	20.3931	21.0369	20.7433	21.0608	20.5171	20.3662	20.3772	20.2532	20.9277	20.6963	20.6418	20.4349	20.5572	20.6812	20.8984	20.7459	20.4853	21.005
AK2	P54819	Adenylate kinase 2, mitochondrial	0.410405	0.177262	0.0727493		0.0392873	0.016057	0.000630836		0.0507535	-0.0257829	-0.00130857		anatomical structure development;biosynthetic process;cellular metabolic process;cellular nitrogen compound metabolic process;cellular process;developmental process;generation of precursor metabolites and energy;heterocycle metabolic process;metabolic process;nitrogen compound metabolic process;nucleobase-containing compound metabolic process;nucleobase-containing small molecule interconversion;n…	cell part;cytosol;extracellular organelle;membrane;organelle;vesicle	Purine metabolism	19.7865	19.767	19.9515	19.9865	20.0896	20.0509	19.7464	20.1598	20.0704	19.9427	20.0679	19.8035	20.1233	20.3799	20.2006	20.3741	20.6054	20.1178	20.0381	19.8927	19.8637	19.6252	19.3832	19.8113	19.4242	19.404	19.5649	19.6419	19.6985	20.0725	19.2347	19.8132
AKAP1	Q92667	A-kinase anchor protein 1, mitochondrial	0.588069	0.272791	0.16042		0.541537	-0.139159	-0.0753599		0.436264	-0.141632	-0.0617891		biological regulation;coagulation;multicellular organismal process;regulation of body fluid levels	cell part;cytosol;intracellular membrane-bounded organelle;intracellular organelle;membrane;mitochondrion;organelle		13.4928	14.1716	14.1066	14.0951	14.3253	14.2129	13.8803	14.1146	14.4105	14.0511	14.4133	13.7624	13.7649	14.4613	14.2441	14.0936	14.3917	13.9985	14.6187	14.429	14.7748	14.0822	14.4247	14.4154	14.505	14.6398	14.1197	14.2251	13.8133	14.1234	14.6513	14.7334
AKR1A1	P14550	Aldo-keto reductase family 1 member A1	0.855756	-0.526837	-0.450844		1.44219	-1.48733	-2.14502	+	0.547468	0.659059	0.360814		alcohol metabolic process;biosynthetic process;carbohydrate metabolic process;catabolic process;cellular aldehyde metabolic process;cellular ketone metabolic process;cellular metabolic process;cellular process;metabolic process;organic acid metabolic process;primary metabolic process;small molecule metabolic process;vitamin metabolic process	cell part;cytosol;extracellular organelle;extracellular space;organelle;vesicle	Caprolactam degradation;Glycerolipid metabolism;Glycolysis / Gluconeogenesis	11.8897	NaN	NaN	NaN	NaN	NaN	11.9559	12.7776	12.9996	12.7527	12.3951	13.1078	12.3567	NaN	12.5231	NaN	12.7174	13.2385	12.4465	12.0796	NaN	NaN	NaN	11.8029	NaN	NaN	NaN	NaN	NaN	NaN	12.0624	NaN
AKR1B1	P15121	Aldo-keto reductase family 1 member B1	0.734431	0.228538	0.167845		0.367548	0.127137	0.046729		0.0503839	-0.0360996	-0.00181884		alcohol metabolic process;biological regulation;biosynthetic process;carbohydrate metabolic process;cellular metabolic process;cellular process;hormone metabolic process;lipid metabolic process;metabolic process;primary metabolic process;response to stimulus;response to stress;small molecule metabolic process	cell part;cytoplasm;cytosol;extracellular organelle;extracellular space;nucleoplasm;organelle;vesicle	Fructose and mannose metabolism;Galactose metabolism;Glycerolipid metabolism;Pentose and glucuronate interconversions;Pyruvate metabolism	16.7695	16.7525	16.4845	16.6155	16.9743	16.5975	16.9577	16.9064	17.0988	16.9281	16.6735	17.1161	16.5213	17.1054	16.688	16.9866	17.0046	17.0326	16.2649	16.7322	16.7243	16.7541	15.8872	16.289	16.4403	16.4859	16.3695	16.4286	16.7495	15.8802	16.1333	16.4756
AKR7A2	O43488	Aflatoxin B1 aldehyde reductase member 2	1.18968	0.368785	0.438735		0.377134	0.235981	0.0889965		0.0389989	0.0321285	0.00125298		carbohydrate metabolic process;cellular aldehyde metabolic process;cellular metabolic process;cellular process;metabolic process;primary metabolic process;small molecule metabolic process;xenobiotic metabolic process	cell part;cytosol;extracellular organelle;Golgi apparatus;intracellular membrane-bounded organelle;intracellular organelle;mitochondrion;organelle;vesicle		14.6631	15.3211	14.9237	15.1572	14.6174	14.4352	14.7014	14.9677	14.9878	14.9332	14.997	15.2664	14.9696	14.736	14.7487	15.2699	15.1126	14.9136	14.479	14.7521	13.6906	13.9229	13.9167	13.8557	13.9057	14.6481	14.6643	14.914	13.982	14.4067	14.5403	15.0467
ALB	P02768	Albumin	1.72372	0.422678	0.728581		0.30607	-0.11199	-0.0342768		0.0624695	0.0390533	0.00243964		behavior;biological regulation;cell activation;cell communication;cell killing;cellular component organization;cellular ketone metabolic process;cellular membrane organization;cellular metabolic process;cellular process;coagulation;endocytosis;establishment of localization;exocytosis;homeostatic process;interspecies interaction between organisms;ion transport;killing of cells of other organism;li…	cell part;extracellular organelle;extracellular region;extracellular space;intracellular membrane-bounded organelle;intracellular organelle;macromolecular complex;nucleus;organelle;protein complex;vesicle		21.3518	22.2458	22.1655	22.1071	21.6426	21.7045	22.0469	22.0209	21.7928	22.055	22.1612	22.4774	21.7106	21.7009	22.0822	22.291	21.8048	21.9598	21.3696	21.9613	21.659	21.4583	21.3907	21.142	21.6347	22.0931	22.1196	21.6041	21.4248	21.3365	21.8233	22.4507
ALDH1A1	P00352	Aldehyde dehydrogenase 1A1	0.0759345	0.0291773	0.00221557		0.27509	0.10818	0.0297592		1.01716	-0.239005	-0.243106		alcohol metabolic process;biological regulation;cellular aldehyde metabolic process;cellular lipid metabolic process;cellular metabolic process;cellular process;hormone metabolic process;lipid metabolic process;metabolic process;primary metabolic process;small molecule metabolic process;vitamin metabolic process;xenobiotic metabolic process	cell part;cytoplasm;cytosol;extracellular organelle;organelle;vesicle	Retinol metabolism	16.1171	16.3359	15.8785	16.0914	15.99	15.9619	16.2683	16.2768	16.1232	16.2878	16.4212	15.9356	16.8614	16.6805	16.7123	16.7938	16.5953	16.2185	16.2839	16.4441	16.5031	16.4922	15.9948	16.113	16.7532	16.6437	16.4526	16.5615	16.6712	16.0779	16.2987	16.3768
ALDH1B1	P30837	Aldehyde dehydrogenase X, mitochondrial	0.137311	0.0657091	0.00902259		0.136465	-0.0615444	-0.00839865		0.616835	0.341593	0.210706		alcohol metabolic process;carbohydrate metabolic process;catabolic process;metabolic process;primary metabolic process;small molecule metabolic process	cell part;intracellular membrane-bounded organelle;intracellular organelle;mitochondrion;nucleoplasm;organelle	Arginine and proline metabolism;Ascorbate and aldarate metabolism;beta-Alanine metabolism;Chloroalkane and chloroalkene degradation;Fatty acid metabolism;Glycerolipid metabolism;Glycolysis / Gluconeogenesis;Histidine metabolism;Limonene and pinene degradation;Lysine degradation;Pentose and glucuronate interconversions;Propanoate metabolism;Pyruvate metabolism;Tryptophan metabolism;Valine, leucine…	18.7774	18.5208	18.4282	18.8803	18.3602	18.7122	18.671	19.0161	19.007	18.9006	18.7087	20.1823	18.8236	18.6254	18.6195	18.7981	18.525	19.0627	19.0659	19.0202	19.0082	19.0834	18.9399	19.1428	18.0899	18.3124	18.9967	18.7468	18.8735	18.3304	18.3371	18.6642
ALDH1L1	O75891	Cytosolic 10-formyltetrahydrofolate dehydrogenase	0.173913	-0.061734	-0.0107364		0.0396835	-0.0104103	-0.000413118		0.0981681	0.0354428	0.00347936		biosynthetic process;catabolic process;cellular aromatic compound metabolic process;cellular metabolic process;cellular nitrogen compound metabolic process;cellular process;cofactor metabolic process;heterocycle metabolic process;metabolic process;nitrogen compound metabolic process;one-carbon metabolic process;small molecule metabolic process	cell part;extracellular organelle;intracellular membrane-bounded organelle;intracellular organelle;mitochondrion;organelle;vesicle	One carbon pool by folate	14.6441	14.5971	14.8042	14.8718	14.8996	15.0215	14.9383	15.2388	14.972	14.74	15.2714	15.0187	15.1362	14.6399	14.5947	15.1088	14.9284	15.2501	14.9407	14.8141	14.9135	14.6611	14.7243	15.0605	14.6697	14.4606	15.0229	14.8327	14.77	14.4532	14.801	15.0091
ALDH2	P05091	Aldehyde dehydrogenase, mitochondrial	0.0130028	-0.00525157	-6.8285e-05		0.413639	0.0828263	0.0342602		0.463247	0.253985	0.117658		alcohol metabolic process;biological regulation;biosynthetic process;carbohydrate metabolic process;catabolic process;cell communication;cell-cell signaling;cellular metabolic process;cellular process;metabolic process;neurotransmitter metabolic process;primary metabolic process;signaling;small molecule metabolic process;xenobiotic metabolic process	cell part;extracellular organelle;organelle;vesicle	Arginine and proline metabolism;Ascorbate and aldarate metabolism;beta-Alanine metabolism;Chloroalkane and chloroalkene degradation;Fatty acid metabolism;Glycerolipid metabolism;Glycolysis / Gluconeogenesis;Histidine metabolism;Limonene and pinene degradation;Lysine degradation;Pentose and glucuronate interconversions;Propanoate metabolism;Pyruvate metabolism;Tryptophan metabolism;Valine, leucine…	16.5419	16.3871	16.4916	16.7252	16.5624	16.7368	16.7009	16.462	16.4224	16.658	16.6107	18.1241	17.1203	16.8412	16.7981	16.921	16.8474	16.9271	16.4159	16.7096	16.7512	16.8331	16.7296	16.6114	16.4487	16.7786	16.9307	16.7199	16.686	16.3394	16.8569	16.8746
ALDH3A2	P51648	Aldehyde dehydrogenase family 3 member A2	0.915851	0.115487	0.105769		0.0923272	0.0377857	0.00348865		0.526877	0.277052	0.145972		alcohol metabolic process;anatomical structure development;cellular aldehyde metabolic process;cellular lipid metabolic process;cellular metabolic process;cellular process;developmental process;lipid metabolic process;metabolic process;primary metabolic process;small molecule metabolic process	cell part;extracellular organelle;intracellular membrane-bounded organelle;intracellular organelle;membrane;microbody;organelle;peroxisome;vesicle	Arginine and proline metabolism;Ascorbate and aldarate metabolism;beta-Alanine metabolism;Chloroalkane and chloroalkene degradation;Fatty acid metabolism;Glycerolipid metabolism;Glycolysis / Gluconeogenesis;Histidine metabolism;Limonene and pinene degradation;Lysine degradation;Pentose and glucuronate interconversions;Propanoate metabolism;Pyruvate metabolism;Tryptophan metabolism;Valine, leucine…	13.8004	14.1566	13.676	13.9001	13.48	13.6025	13.7818	13.8538	13.6958	14.1392	14.2744	14.9412	13.9354	13.8821	13.8443	14.1211	13.9457	14.1347	13.9758	13.8858	14.052	13.989	13.5408	14.0355	13.9252	14.0418	14.0722	13.52	13.4557	13.7163	13.6613	13.9528
ALDH4A1	P30038	Delta-1-pyrroline-5-carboxylate dehydrogenase, mitochondrial	0.0524047	0.0175225	0.000918261		0.313007	0.0845871	0.0264764		0.19003	-0.0605496	-0.0115063		amine metabolic process;biosynthetic process;catabolic process;cellular amino acid metabolic process;cellular ketone metabolic process;cellular metabolic process;cellular nitrogen compound metabolic process;cellular process;heterocycle metabolic process;metabolic process;nitrogen compound metabolic process;organic acid metabolic process;primary metabolic process;small molecule metabolic process	cell part	Alanine, aspartate and glutamate metabolism;Arginine and proline metabolism	16.2355	16.0823	16.1952	16.3513	16.3689	16.484	16.3061	16.4131	16.2625	16.3212	16.1728	16.3753	16.7422	16.6904	16.6535	16.5297	16.6786	16.4979	16.2787	16.2831	16.7078	16.519	16.4411	16.4478	16.3552	16.6367	16.2048	16.6259	16.5751	15.8558	16.4695	16.3866
ALDH5A1	P51649	Succinate-semialdehyde dehydrogenase, mitochondrial	0.171579	0.12031	0.0206428		0.232336	0.17222	0.040013		0.41479	-0.268267	-0.111274		alcohol metabolic process;amine metabolic process;anatomical structure development;biological regulation;carbohydrate metabolic process;catabolic process;cell communication;cell-cell signaling;cellular amino acid metabolic process;cellular component assembly;cellular component organization;cellular ketone metabolic process;cellular lipid metabolic process;cellular metabolic process;cellular nitro…	cell part;intracellular membrane-bounded organelle;intracellular organelle;mitochondrion;organelle	Alanine, aspartate and glutamate metabolism;Butanoate metabolism	14.7702	14.7508	14.6993	14.7172	15.2475	15.1488	14.3225	14.6059	14.576	14.507	14.4368	14.4486	15.5247	15.4712	15.4172	15.3107	15.4721	15.3572	15.1836	15.5323	15.5696	15.6731	15.192	15.1367	14.9676	15.2262	14.0886	15.0259	15.1425	13.8783	15.76	15.6641
ALDH6A1	Q02252	Methylmalonate-semialdehyde dehydrogenase [acylating], mitochondrial	0.226488	-0.417957	-0.0946623		0.371197	0.206071	0.0764929		0.870592	-0.273437	-0.238052		amine metabolic process;catabolic process;cell differentiation;cellular amino acid metabolic process;cellular aromatic compound metabolic process;cellular ketone metabolic process;cellular metabolic process;cellular nitrogen compound metabolic process;cellular process;developmental process;heterocycle metabolic process;metabolic process;nitrogen compound metabolic process;nucleobase-containing co…	cell part;extracellular organelle;intracellular membrane-bounded organelle;intracellular organelle;mitochondrion;nucleoplasm;organelle;vesicle	Inositol phosphate metabolism;Propanoate metabolism;Valine, leucine and isoleucine degradation	15.0498	NaN	13.5648	14.7673	14.7207	14.8537	14.7543	14.6189	14.9079	14.9374	14.7872	14.3334	15.0853	15.1055	14.785	15.0594	14.9448	15.0666	15.0683	15.3159	14.8844	14.5835	15.2416	14.6097	14.5509	15.2805	15.1197	15.2337	15.289	14.2966	14.439	15.4145
ALDH9A1	P49189	4-trimethylaminobutyraldehyde dehydrogenase	0.168778	-0.0458876	-0.00774484		0.354768	0.0980453	0.0347833		0.3348	-0.166101	-0.0556106		amine metabolic process;anatomical structure development;biological regulation;biosynthetic process;cellular aldehyde metabolic process;cellular amino acid metabolic process;cellular ketone metabolic process;cellular metabolic process;cellular nitrogen compound metabolic process;cellular process;developmental process;hormone metabolic process;metabolic process;neurotransmitter metabolic process;n…	cell part;cytoplasm;cytosol;extracellular organelle;intracellular membrane-bounded organelle;intracellular organelle;mitochondrion;organelle;vesicle	Arginine and proline metabolism;Ascorbate and aldarate metabolism;beta-Alanine metabolism;Fatty acid metabolism;Glycerolipid metabolism;Glycolysis / Gluconeogenesis;Histidine metabolism;Lysine degradation;Propanoate metabolism;Pyruvate metabolism;Tryptophan metabolism;Valine, leucine and isoleucine degradation	17.2103	16.8965	17.0516	17.1147	17.2598	17.2613	17.3055	17.2817	17.2822	17.0857	17.3081	17.0389	17.1625	16.9883	16.9281	17.2456	17.1608	17.2748	16.8759	16.9707	16.8641	16.9905	16.9559	17.0433	16.8885	17.0551	16.4847	16.8576	17.1848	15.9613	17.328	17.3031
ALDOA	P04075	Fructose-bisphosphate aldolase A	0.193714	0.0623668	0.0120813		0.30164	0.0774085	0.0233495		0.589388	-0.153247	-0.090322		alcohol metabolic process;biological regulation;biosynthetic process;carbohydrate metabolic process;catabolic process;cell activation;cellular component assembly;cellular component organization;cellular homeostasis;cellular metabolic process;cellular nitrogen compound metabolic process;cellular process;coagulation;cytoskeleton organization;establishment of localization;exocytosis;generation of pr…	cell part;cytoskeleton;cytosol;extracellular organelle;extracellular region;extracellular space;intracellular membrane-bounded organelle;intracellular non-membrane-bounded organelle;intracellular organelle;membrane;nucleus;organelle;vesicle	Carbon fixation in photosynthetic organisms;Fructose and mannose metabolism;Glycolysis / Gluconeogenesis;Pentose phosphate pathway	22.3301	22.3318	22.3495	22.3085	22.3917	22.4084	22.3575	22.5025	22.3534	22.2187	22.3776	21.9018	22.2386	22.0416	22.0149	22.3737	22.2518	22.5148	21.9375	22.0364	22.0001	22.0425	22.1738	22.1698	21.9423	21.8805	21.8507	22.3578	22.2958	21.7208	22.0567	22.444
ALDOC	P09972	Fructose-bisphosphate aldolase C	0.00762503	0.0049146	3.7474e-05		0.265333	-0.0922912	-0.0244879		0.0789476	-0.0366402	-0.00289265		aging;alcohol metabolic process;anatomical structure morphogenesis;biosynthetic process;carbohydrate metabolic process;cell death;cell differentiation;cellular component assembly;cellular component organization;cellular metabolic process;cellular process;death;developmental process;macromolecular complex assembly;metabolic process;primary metabolic process;protein complex assembly;response to che…	cell part;cell projection;cytoskeleton;cytosol;extracellular organelle;intracellular membrane-bounded organelle;intracellular non-membrane-bounded organelle;intracellular organelle;mitochondrion;neuron projection;organelle;vesicle	Carbon fixation in photosynthetic organisms;Fructose and mannose metabolism;Glycolysis / Gluconeogenesis;Pentose phosphate pathway	17.7232	17.7988	18.0925	17.812	18.1767	18.4218	18.9329	18.7024	18.1735	17.6509	17.8238	17.5242	17.9476	18.0188	17.7506	18.3965	18.1867	18.317	17.9733	17.8539	18.1064	17.9504	17.9128	18.3543	18.1409	18.2825	17.8663	18.2086	18.4649	17.8591	17.963	18.054
ALPK3	Q96L96	Alpha-protein kinase 3	0.737387	0.32741	0.241427		0.301154	0.0995584	0.0299824		0.798328	0.502667	0.401293		anatomical structure development;developmental process	cell part;intracellular membrane-bounded organelle;intracellular organelle;nucleus;organelle		15.0513	15.1259	15.0385	15.3932	14.6435	15.3948	15.5509	16.1362	15.7063	15.6112	15.7506	17.1971	14.7773	15.1618	15.1626	15.4782	15.5103	15.4688	15.4165	15.4896	15.2667	15.4876	15.1311	15.3129	15.7197	16.0952	15.9215	15.5198	15.2344	15.6306	15.2929	15.7644
ALYREF	Q86V81	THO complex subunit 4	1.54252	2.08136	3.21053	+	0.105201	0.161785	0.01702		0.49528	-0.689836	-0.341662		biological regulation;biosynthetic process;cell differentiation;cellular metabolic process;cellular nitrogen compound metabolic process;cellular process;developmental process;DNA metabolic process;establishment of localization;interspecies interaction between organisms;macromolecule metabolic process;metabolic process;mRNA metabolic process;mRNA processing;multi-organism process;nitrogen compound…	cell part;cytosol;extracellular organelle;intracellular membrane-bounded organelle;intracellular organelle;macromolecular complex;membrane;nucleoplasm;nucleus;organelle;protein complex;ribonucleoprotein complex;spliceosomal complex;transcription export complex;vesicle	mRNA surveillance pathway;RNA transport;Spliceosome	14.7673	14.1594	13.6772	15.4441	14.9489	14.7087	NaN	14.4243	14.901	14.4942	14.6146	NaN	NaN	14.6522	12.8904	NaN	15.0715	14.9608	14.9497	13.7076	14.3763	14.7841	14.1627	15.1862	NaN	14.8747	14.2616	14.974	14.2734	14.1037	NaN	15.0039
AMPD1	P23109	AMP deaminase 1	0.373422	0.844198	0.315242		0.22105	-0.692081	-0.152984		0.384174	-0.748467	-0.287542		biosynthetic process;cellular aromatic compound metabolic process;cellular metabolic compound salvage;cellular metabolic process;cellular nitrogen compound metabolic process;cellular process;heterocycle metabolic process;metabolic process;nitrogen compound metabolic process;nucleobase-containing compound metabolic process;nucleobase-containing small molecule metabolic process;nucleotide metabolic…	cell part;cytosol	Purine metabolism	18.2948	17.9762	17.9032	17.9877	18.0151	18.3861	NaN	17.8876	14.657	NaN	17.9986	12.7831	18.1946	17.9116	17.9708	17.8229	18.0359	18.0191	18.0211	18.2096	18.6186	18.4375	17.3114	18.0972	17.8631	17.7933	17.5599	17.8783	17.9629	17.2484	17.4956	17.1648
AMPD3	Q01432	AMP deaminase 3	0.125294	0.20789	0.0260473		0.0111573	0.0203228	0.000226748		0.0785136	-0.145836	-0.0114501		biological regulation;biosynthetic process;catabolic process;cellular aromatic compound metabolic process;cellular metabolic compound salvage;cellular metabolic process;cellular nitrogen compound metabolic process;cellular process;heterocycle metabolic process;homeostatic process;metabolic process;multicellular organismal process;nitrogen compound metabolic process;nucleobase-containing compound …	cell part;cytosol	Purine metabolism	11.3647	NaN	11.3752	12.7025	NaN	10.4903	13.4742	13.8141	12.8554	13.0228	9.89073	13.8848	NaN	NaN	11.8559	NaN	NaN	NaN	10.6642	11.3487	NaN	11.4451	NaN	NaN	NaN	NaN	13.5675	10.2568	12.6862	NaN	NaN	12.5926
ANK1	P16157	Ankyrin-1	0.428987	0.284259	0.121944		0.255788	-0.179908	-0.0460185		0.125372	0.111266	0.0139497		anatomical structure development;biological regulation;biosynthetic process;cell development;cellular component organization;cellular metabolic process;cellular nitrogen compound metabolic process;cellular process;cofactor metabolic process;cytoskeleton organization;developmental process;establishment of localization;establishment or maintenance of cell polarity;exocytosis;Golgi vesicle transport…	cell part;cytoskeleton;cytosol;endoplasmic reticulum;intracellular membrane-bounded organelle;intracellular non-membrane-bounded organelle;intracellular organelle;membrane;nucleus;organelle;plasma membrane		14.3665	16.2555	16.292	15.6766	14.4451	14.9565	15.8169	15.5437	15.0422	15.5069	15.8944	15.6652	15.1697	15.2331	15.4796	16.2236	14.7364	14.3549	14.8168	15.174	15.153	14.7494	14.8528	14.2128	15.4837	14.9218	15.5847	15.1727	14.4864	15.5815	15.6776	15.9087
ANK2	Q01484	Ankyrin-2	0.277756	-0.105299	-0.0292473		0.104207	-0.0578213	-0.00602536		0.804473	0.459403	0.369577		anatomical structure development;anatomical structure formation involved in morphogenesis;biological regulation;cell junction organization;cellular component assembly;cellular component organization;cellular homeostasis;cellular ion homeostasis;cellular localization;cellular membrane organization;cellular process;developmental process;establishment of localization;homeostatic process;ion transpor…	cell part;cell projection;cytoskeleton;cytosol;intracellular;intracellular non-membrane-bounded organelle;intracellular organelle;membrane;neuron projection;organelle;plasma membrane		14.3675	14.6892	14.1819	14.3056	14.5567	14.3121	14.4521	14.5673	15.0423	14.5606	14.4057	15.1434	14.3297	14.465	14.0872	14.2018	14.1792	14.4584	14.4416	13.6172	14.3266	14.2817	14.3423	14.4827	14.2771	14.1416	14.4507	14.582	12.8849	14.8001	14.4275	14.1833
ANK3	Q12955	Ankyrin-3	0.558215	-0.166605	-0.0930012		0.357676	-0.150753	-0.0539206		0.925637	0.214463	0.198515		anatomical structure morphogenesis;biological regulation;cellular component assembly;cellular component morphogenesis;cellular component organization;cellular homeostasis;cellular ion homeostasis;cellular localization;cellular membrane organization;cellular process;cytokinesis;cytoskeleton organization;developmental process;establishment of localization;Golgi vesicle transport;homeostatic process…	cell part;cell projection;cell surface;cytoskeleton;endoplasmic reticulum;Golgi apparatus;intracellular membrane-bounded organelle;intracellular non-membrane-bounded organelle;intracellular organelle;lysosome;membrane;neuron projection;organelle;plasma membrane;synapse;vacuole		14.7372	14.2997	15.1831	14.2581	14.7471	15.0005	15.1059	15.0441	14.9244	14.6547	14.9702	15.412	14.543	14.7154	14.4355	14.7309	14.8406	14.8401	14.712	14.4998	14.2157	14.5698	14.5246	14.8726	14.97	14.9102	14.9898	15.0536	14.7459	14.8138	14.8122	14.4114
ANKRD1	Q15327	Ankyrin repeat domain-containing protein 1	0.350447	0.839728	0.29428		0.458562	1.71918	0.788352		0.0834693	-0.413737	-0.0345343		anatomical structure morphogenesis;biological regulation;cell differentiation;cellular component organization;cellular lipid metabolic process;cellular metabolic process;cellular process;cytoskeleton organization;developmental process;lipid metabolic process;metabolic process;organelle organization;primary metabolic process;regulation of DNA metabolic process;regulation of transport;response to a…	cell part;cytoplasm;cytosol;intracellular membrane-bounded organelle;intracellular non-membrane-bounded organelle;intracellular organelle;macromolecular complex;nucleolus;nucleoplasm;nucleus;organelle;protein complex;transcription factor complex		NaN	16.4301	NaN	16.4217	16.5564	16.5391	11.8458	NaN	NaN	15.1457	16.5239	18.8096	13.495	12.6791	13.067	NaN	13.7277	16.6751	NaN	NaN	NaN	17.6794	NaN	NaN	NaN	NaN	17.4962	NaN	18.1464	NaN	14.2156	13.9893
ANKRD2	Q9GZV1	Ankyrin repeat domain-containing protein 2	0.444702	0.232754	0.103506		0.521667	0.372337	0.194236		0.132398	-0.0831232	-0.0110054		anatomical structure development;biological regulation;cell differentiation;cellular process;developmental process;multicellular organismal process;muscle contraction;response to chemical stimulus;response to oxidative stress;response to stimulus;response to stress	cell part;cytosol;intracellular membrane-bounded organelle;intracellular organelle;nucleus;organelle		17.1505	16.8837	15.6824	17.0593	16.4641	16.0302	16.9922	17.3826	17.4012	17.7433	17.1988	17.5251	17.5227	17.5367	17.5155	17.679	16.9711	16.8994	17.5169	17.7221	17.648	17.6111	16.608	17.1058	16.4028	16.9106	16.521	17.041	16.9059	16.5328	16.5162	17.0622
ANKRD23	Q86SG2	Ankyrin repeat domain-containing protein 23	0.625775	1.17313	0.734113		0.520073	0.8135	0.423079		0.180441	-0.370174	-0.0667946		response to abiotic stimulus;response to external stimulus;response to stimulus	cell part;cytoplasm;cytoskeleton;intracellular non-membrane-bounded organelle;intracellular organelle;nucleoplasm;organelle		11.6522	NaN	NaN	13.1333	13.478	12.5418	13.2383	NaN	12.9191	13.0065	13.194	14.0594	10.7158	14.0043	NaN	NaN	12.5139	NaN	NaN	NaN	12.2816	12.8642	NaN	NaN	NaN	13.4623	12.4996	12.5541	14.0271	NaN	NaN	13.0919
ANOS1	P23352	Anosmin-1	0.145718	-0.263152	-0.038346		0.173085	-0.387266	-0.0670301		0.40562	0.723779	0.293579		biological adhesion;cell adhesion;cellular component movement;cellular process;locomotion;response to chemical stimulus;response to external stimulus;response to stimulus	cell part;extracellular matrix;extracellular space;membrane;plasma membrane;proteinaceous extracellular matrix		13.9846	13.8748	14.3013	13.5396	13.7687	14.6055	12.8989	12.146	NaN	NaN	13.0476	13.9152	NaN	NaN	NaN	12.628	12.7566	13.2954	13.162	NaN	12.7501	13.1171	NaN	12.0161	13.4673	NaN	NaN	NaN	NaN	NaN	NaN	12.4918
ANXA1	P04083	Annexin A1	0.338605	-0.431077	-0.145965		0.985459	-0.338945	-0.334017		1.03155	0.537325	0.554277		anatomical structure development;biological regulation;cell activation;cell differentiation;cellular component movement;cellular metabolic process;cellular nitrogen compound metabolic process;cellular process;developmental process;DNA geometric change;DNA metabolic process;establishment of localization;homeostatic process;hormone transport;immune system process;lipid transport;macromolecule metab…	cell part;cell projection;cell surface;cilium;cytoplasm;cytoskeleton;endosome;extracellular organelle;extracellular region;extracellular space;intracellular membrane-bounded organelle;intracellular non-membrane-bounded organelle;intracellular organelle;lysosome;macromolecular complex;membrane;nucleus;organelle;plasma membrane;protein complex;vacuole;vesicle		14.168	14.9316	15.2157	14.4881	13.8099	14.4176	13.645	14.0788	15.1225	14.7011	14.454	16.0361	14.3611	14.6374	14.5737	14.5563	14.9512	15.3529	14.5972	14.3293	14.2882	14.0259	14.4556	14.6171	17.3935	14.6784	14.5069	14.3558	14.3941	14.836	15.2573	14.18
ANXA11	P50995	Annexin A11	0.26868	0.0391022	0.010506		1.34125	0.208025	0.279014		0.078793	-0.00880067	-0.000693431		cell cycle;cell division;cellular component organization;cellular membrane organization;cellular process;endocytosis;establishment of localization;membrane invagination;membrane organization;response to chemical stimulus;response to stimulus;transport;vesicle-mediated transport	cell part;cytoplasm;cytoplasmic membrane-bounded vesicle;extracellular organelle;intracellular membrane-bounded organelle;intracellular non-membrane-bounded organelle;intracellular organelle;lysosome;membrane;midbody;nuclear envelope;nucleoplasm;organelle;vacuole;vesicle		15.3158	15.1766	15.2257	15.1458	15.1933	15.2596	15.4575	15.4997	15.3451	15.4339	15.2648	15.3399	15.4267	15.4311	15.1982	15.5522	15.22	15.2336	15.2812	15.2728	15.3202	15.5876	15.3846	15.3694	15.2351	15.4253	14.9739	15.5174	15.3411	15.1955	15.2822	15.4277
ANXA2	P07355	Annexin A2	0.0596597	0.0149488	0.000891844		0.467724	-0.178448	-0.0834644		0.690581	0.281794	0.194602		anatomical structure formation involved in morphogenesis;biological regulation;cellular component assembly;cellular component organization;cellular membrane organization;cellular process;developmental process;establishment of localization;extracellular matrix organization;extracellular structure organization;macromolecular complex assembly;membrane organization;multicellular organismal process;or…	cell cortex;cell part;cell projection;cell surface;cytoplasmic membrane-bounded vesicle;endosome;extracellular organelle;extracellular space;intracellular membrane-bounded organelle;intracellular organelle;lipid particle;membrane;midbody;nucleus;organelle;plasma membrane;vesicle		16.9724	17.2708	17.5723	17.1359	17.1414	17.0394	16.732	17.0413	17.4546	16.9582	17.1891	18.2435	17.2127	17.092	17.0874	16.9754	17.3188	17.5506	17.1284	16.9333	17.1845	16.9497	16.8247	17.0894	17.0062	17.0797	17.2311	17.9347	17.3554	17.0632	17.1873	16.9116
ANXA3	P12429	Annexin A3	0.595115	-0.345336	-0.205515		0.450966	0.305243	0.137654		0.621095	-0.391836	-0.243367		biological regulation;cell activation;cellular component organization;cellular membrane organization;cellular process;endocytosis;establishment of localization;exocytosis;immune system process;membrane invagination;membrane organization;multi-organism process;response to biotic stimulus;response to stimulus;response to stress;secretion;transport;vesicle-mediated transport	cell part;cytoplasm;cytoplasmic membrane-bounded vesicle;extracellular organelle;intracellular membrane-bounded organelle;intracellular organelle;membrane;organelle;plasma membrane;vesicle		12.8652	13.2557	13.3979	13.3431	13.6324	12.6746	13.7429	13.2938	13.3209	13.6249	12.6863	13.1075	13.6875	12.272	13.1338	14.0003	13.5016	12.9645	13.2986	13.2613	12.9276	12.8383	13.378	12.3656	12.5078	12.2992	13.4222	13.1694	12.7524	NaN	12.9274	12.5754
ANXA4	P09525	Annexin A4	0.448705	0.102682	0.046074		0.409141	0.177135	0.0724732		0.18292	0.0860945	0.0157485		biological regulation;cell differentiation;cellular process;developmental process;regulation of transport;response to stimulus;signal transduction	cell part;cell surface;cytoplasm;extracellular organelle;intracellular membrane-bounded organelle;intracellular organelle;membrane;nucleus;organelle;plasma membrane;vesicle		13.497	13.3022	13.5191	13.6331	13.3147	13.2177	13.3423	13.4645	13.5206	13.2571	13.5987	13.8062	13.5287	13.6335	13.4252	13.8949	13.6464	13.6537	13.0425	13.3072	13.2508	13.3028	13.2073	13.5874	13.432	13.5475	12.487	13.4592	13.7542	14.0249	13.0721	13.2758
ANXA5	P08758	Annexin A5	0.664507	0.250109	0.166199		0.153426	0.075514	0.0115858		0.323009	0.211727	0.0683899		biological regulation;cellular process;coagulation;multicellular organismal process;regulation of body fluid levels;response to chemical stimulus;response to stimulus;signal transduction	cell part;cytoplasm;extracellular organelle;intracellular;membrane;organelle;vesicle		16.1866	16.679	15.9922	16.2875	16.1961	16.073	15.9554	16.3008	16.5707	16.2472	16.1898	16.9575	16.4795	16.606	16.3976	16.7027	16.7166	17.0366	16.1495	16.2992	16.0484	16.1025	15.4713	16.3398	15.5469	15.7154	15.6377	15.7594	16.1405	15.5905	15.9565	16.1746
ANXA6	P08133	Annexin A6	0.342899	-0.0441523	-0.0151397		0.0833631	-0.0165443	-0.00137919		0.076031	-0.0247971	-0.00188535		biological regulation;cellular component assembly;cellular component organization;cellular process;establishment of localization;ion transport;macromolecular complex assembly;protein complex assembly;transmembrane transport;transport	cell part;cytoplasmic membrane-bounded vesicle;extracellular organelle;intracellular membrane-bounded organelle;intracellular organelle;membrane;organelle;vesicle		18.337	18.3422	18.2444	18.3087	18.3568	18.4048	18.3352	18.2515	18.2007	17.9861	18.2164	18.3887	18.2367	17.9851	18.1326	18.2332	18.0667	18.2341	18.2226	18.1839	18.4392	18.3198	18.2607	18.4118	18.2483	18.2968	18.1773	18.309	18.4039	17.7211	18.2105	18.266
ANXA7	P20073	Annexin A7	0.711015	0.158182	0.11247		0.521066	0.183486	0.0956084		0.0161801	-0.0102107	-0.000165209		autophagy;behavior;behavioral interaction between organisms;biological regulation;catabolic process;cell differentiation;cell proliferation;cellular component organization;cellular homeostasis;cellular ion homeostasis;cellular metabolic process;cellular process;developmental process;homeostatic process;membrane fusion;membrane organization;metabolic process;multicellular organismal process;multi-…	cell part;cytosol;extracellular organelle;intracellular membrane-bounded organelle;intracellular organelle;membrane;nuclear envelope;nucleus;organelle;plasma membrane;vesicle		15.523	15.796	15.309	15.3405	15.3912	15.3946	15.5026	15.5908	15.727	15.634	15.5555	16.0496	15.9106	15.9033	15.8673	15.9086	16.0624	15.947	15.5178	15.6822	15.2157	15.5667	15.2214	15.4396	15.2796	15.3891	14.8551	15.5165	15.4365	14.8249	15.3734	15.6946
AOC3	Q16853	Membrane primary amine oxidase	0.0617006	0.0281719	0.00173822		0.393517	0.125785	0.0494986		0.149896	0.0785306	0.0117714		amine metabolic process;biological adhesion;cell adhesion;cellular process;establishment of localization;ion transport;metabolic process;nitrogen compound metabolic process;response to chemical stimulus;response to stimulus;response to stress;transport	cell part;cell projection;cell surface;cytoplasm;endoplasmic reticulum;endosome;Golgi apparatus;intracellular membrane-bounded organelle;intracellular organelle;membrane;microvillus;organelle;plasma membrane	beta-Alanine metabolism;Glycine, serine and threonine metabolism;Isoquinoline alkaloid biosynthesis;Phenylalanine metabolism;Tropane, piperidine and pyridine alkaloid biosynthesis;Tyrosine metabolism	15.2004	15.4172	15.5407	15.3998	15.4374	15.4022	15.7891	15.5738	15.7751	15.5426	15.4774	16.0643	15.6212	15.3235	15.5114	15.5707	15.1992	15.2481	15.5874	15.7135	15.0525	15.9169	15.3449	15.7224	16.032	15.9299	15.6214	15.869	16.1759	15.262	15.1449	15.586
AP1M1	Q9BXS5	AP-1 complex subunit mu-1	0.66725	0.659355	0.439954		0.305163	-1.05735	-0.322663		0.227194	-0.690259	-0.156823		biological regulation;cellular component organization;cellular process;endosome transport;establishment of localization;Golgi vesicle transport;immune system process;membrane organization;organelle organization;pigment granule organization;protein transport;transport;vesicle organization;vesicle-mediated transport;viral reproduction	AP-type membrane coat adaptor complex;cell part;cytosol;extracellular organelle;macromolecular complex;membrane;organelle;protein complex;vesicle	Lysosome	NaN	12.6796	NaN	NaN	NaN	13.7513	13.7486	12.3761	NaN	13.2763	13.2149	13.8624	12.3438	12.7681	NaN	12.7506	NaN	12.7934	NaN	12.2694	12.2666	NaN	NaN	NaN	12.5067	NaN	NaN	NaN	18.8026	NaN	NaN	13.4415
AP2B1	P63010	AP-2 complex subunit beta	0.456444	-0.18309	-0.0835702		1.40984	0.23018	0.324515		0.0684759	-0.0489853	-0.00335432					12.4085	12.6839	12.7055	12.6857	12.9865	12.2446	12.7518	12.3916	12.2741	12.4366	12.8046	12.6678	12.4835	12.1436	12.154	12.6296	11.5241	12.2039	13.2513	12.8477	12.2088	12.7008	12.2448	12.748	12.6626	12.639	12.3345	12.4454	12.5079	11.7778	12.3266	12.0799
APEH	P13798	Acylamino-acid-releasing enzyme	0.245925	-0.0430711	-0.0105923		1.15765	0.16469	0.190654		0.373214	-0.0592098	-0.0220979		cellular metabolic process;cellular process;macromolecule metabolic process;metabolic process;primary metabolic process;protein metabolic process;proteolysis	cell part;cytoplasm;extracellular organelle;membrane;organelle;vesicle		20.4355	20.4048	20.1093	20.4428	20.4511	20.3878	20.6279	20.5955	20.4136	20.3007	20.3576	20.3448	20.3944	20.3108	20.3212	20.6227	20.3588	20.0603	20.4656	20.2811	20.4222	20.6024	20.2625	20.4847	20.5271	20.4923	20.2621	20.5408	20.4155	20.3789	20.2351	20.3426
APEX1	P27695	DNA-(apurinic or apyrimidinic site) endonuclease	0.145184	0.124978	0.0181448		0.67304	-0.18401	-0.123846		0.747088	0.320104	0.239146		aging;biological regulation;biosynthetic process;cell cycle;cellular component organization;cellular homeostasis;cellular metabolic process;cellular nitrogen compound metabolic process;cellular process;chromosome organization;developmental process;DNA metabolic process;DNA modification;DNA recombination;DNA repair;DNA replication;homeostatic process;macromolecule metabolic process;macromolecule m…	cell part;centrosome;cytoplasm;endoplasmic reticulum;intracellular membrane-bounded organelle;intracellular non-membrane-bounded organelle;intracellular organelle;macromolecular complex;microtubule organizing center;mitochondrion;nucleolus;nucleoplasm;nucleus;organelle;protein complex;ribonucleoprotein complex;ribosome;transcription factor complex	Base excision repair	13.5043	13.7318	14.4834	13.6951	13.0331	13.6953	13.8542	13.7007	13.5875	13.7354	13.3965	14.2164	14.3107	13.629	14.0483	13.7831	13.9961	13.373	14.3064	14.0863	13.7455	13.7107	13.9894	13.9014	12.2914	14.2371	14.1189	13.8253	13.9342	14.3161	14.2306	13.8626
APOBEC2	Q9Y235	C->U-editing enzyme APOBEC-2	0.574326	0.0921564	0.0529278		0.0695317	0.0221408	0.00153949		0.249439	0.0722726	0.0180276		biological regulation;catabolic process;cellular metabolic process;cellular nitrogen compound metabolic process;cellular process;DNA metabolic process;DNA modification;heterocycle metabolic process;macromolecule metabolic process;macromolecule modification;metabolic process;mRNA metabolic process;mRNA processing;nitrogen compound metabolic process;nucleobase-containing compound catabolic process;…		Atrazine degradation	18.6426	18.7197	18.6865	18.5044	18.7609	18.8668	18.6934	18.7742	18.7021	18.5996	18.9347	18.4558	18.5723	18.5916	18.4853	18.7897	18.6095	18.7745	18.5775	18.6793	18.845	18.7043	18.2309	18.7835	18.7342	18.6279	18.113	18.4962	18.6804	18.57	18.2349	18.615
APOD	P05090	Apolipoprotein D	1.21042	1.72187	2.08419	+	0.629583	1.04707	0.659219		0.498009	-0.632746	-0.315113		aging;alcohol metabolic process;anatomical structure development;anatomical structure formation involved in morphogenesis;anatomical structure morphogenesis;biological regulation;carbohydrate metabolic process;cellular component morphogenesis;cellular component organization;cellular metabolic process;cellular process;developmental process;establishment of localization;growth;lipid metabolic proce…	cell body;cell part;cell projection;endoplasmic reticulum;extracellular organelle;extracellular region;extracellular space;intracellular membrane-bounded organelle;intracellular non-membrane-bounded organelle;intracellular organelle;macromolecular complex;neuron projection;neuronal cell body;organelle;ribonucleoprotein complex;ribosome;vesicle		14.052	15.6336	14.4195	14.6289	14.6534	14.2967	14.8239	15.229	14.5197	14.8284	15.442	15.066	NaN	14.6026	14.9101	15.1223	15.6703	15.4152	13.5266	14.069	NaN	14.3413	14.2927	14.4314	NaN	12.9777	NaN	14.5258	14.4401	NaN	13.7203	15.5668
APOE	P02649	Apolipoprotein E	0.227611	0.403863	0.0919239		0.618024	-1.16225	-0.718295		0.40664	-0.858254	-0.349001		aging;alcohol metabolic process;anatomical structure morphogenesis;biological regulation;biosynthetic process;catabolic process;cell communication;cell differentiation;cell-cell signaling;cellular component assembly;cellular component morphogenesis;cellular component organization;cellular homeostasis;cellular ion homeostasis;cellular lipid metabolic process;cellular localization;cellular membrane…	cell body;cell part;cell projection;cytoplasm;endoplasmic reticulum;endosome;extracellular matrix;extracellular organelle;extracellular region;extracellular space;Golgi apparatus;intracellular membrane-bounded organelle;intracellular organelle;lysosome;macromolecular complex;membrane;neuron projection;neuronal cell body;nuclear envelope;nucleus;organelle;plasma membrane;protein complex;vacuole;ve…	Alzheimer's disease	NaN	NaN	14.0485	13.8974	NaN	13.4637	13.923	13.8533	13.6807	13.8932	14.0264	13.8173	13.1243	13.4389	14.4314	14.4709	NaN	14.0693	NaN	13.123	12.9568	NaN	13.643	NaN	14.3075	NaN	13.5367	13.7667	13.5248	NaN	12.5116	14.2959
APOO	Q9BUR5	MICOS complex subunit MIC26	0.00061544	-0.000300248	-1.84785e-07		0.0699831	-0.0284103	-0.00198824		0.64651	-0.471484	-0.304819		establishment of localization;lipid transport;transport	cell part;extracellular space;intracellular membrane-bounded organelle;intracellular organelle;macromolecular complex;mitochondrion;organelle		15.1739	14.8564	14.606	14.685	14.9772	14.7794	14.9703	14.9136	15.0889	14.6775	14.8554	14.5119	14.8106	15.3548	14.803	15.2572	15.1758	15.1618	14.4621	14.3853	14.8712	14.4077	14.74	14.768	14.6749	14.6471	15.0928	15.0154	15.4543	NaN	14.8985	14.8313
APOOL	Q6UXV4	MICOS complex subunit MIC27	0.020165	-0.00734679	-0.000148148		0.151089	0.0387217	0.00585042		0.0605302	0.0241071	0.00145921			cell part;membrane		16.2179	16.2001	16.0449	15.9205	15.8935	16.3628	15.59	15.9613	15.517	15.7941	15.798	15.4888	16.2524	16.1506	16.1188	16.0067	15.9986	15.8118	15.8891	15.8108	16.0247	15.9494	15.4744	15.6148	16.3076	16.0447	15.6915	15.9152	15.8897	15.8981	16.0727	16.1182
AQP1	P29972	Aquaporin-1	0.337185	-0.672321	-0.226697		0.0407135	-0.0475283	-0.00193504		0.130726	0.343422	0.0448943		anatomical structure development;anatomical structure morphogenesis;biological regulation;biosynthetic process;carbohydrate transport;cell communication;cellular component organization;cellular homeostasis;cellular metabolic process;cellular nitrogen compound metabolic process;cellular process;cytoskeleton organization;developmental process;digestion;establishment of localization;establishment or…	apical part of cell;brush border;cell part;cell projection;cytoplasm;extracellular organelle;intracellular membrane-bounded organelle;intracellular organelle;membrane;nucleus;organelle;plasma membrane;vesicle	Bile secretion;Proximal tubule bicarbonate reclamation	NaN	13.6546	14.2379	14.3177	NaN	NaN	14.5505	14.4847	13.6438	13.5138	13.8877	14.9692	13.865	13.6309	15.2737	14.9863	14.6259	14.0567	14.8672	14.7065	14.8557	14.6091	14.6225	14.9166	14.7778	NaN	13.375	13.6439	14.3596	14.6794	15.16	14.773
AQP4	P55087	Aquaporin-4	0.458931	-0.206682	-0.0948526		0.959942	-0.241517	-0.231843		0.0936545	0.0716581	0.00671111		biological regulation;carbohydrate transport;cellular component assembly;cellular component organization;cellular homeostasis;cellular process;establishment of localization;fluid transport;gas transport;homeostatic process;ion transport;macromolecular complex assembly;multicellular organismal process;multi-organism process;neurological system process;polyol transport;protein complex assembly;regu…	cell part;cytoplasm;macromolecular complex;membrane;plasma membrane;protein complex	Bile secretion;Vasopressin-regulated water reabsorption	13.9926	13.6449	14.4334	13.96	14.3249	13.7273	14.6275	14.5706	14.9231	14.7122	14.773	15.4394	14.777	14.5556	14.5422	14.6555	14.6508	14.9242	14.3502	14.4147	14.5967	14.5031	14.8806	14.5333	14.62	14.1775	14.6383	14.185	13.796	14.4713	14.9447	14.7086
ARHGDIA	P52565	Rho GDP-dissociation inhibitor 1	0.035738	-0.010424	-0.000372532		0.203431	0.0587749	0.0119566		0.75213	0.23665	0.177991		biological regulation;cellular component movement;cellular process;response to stimulus;signal transduction	cell part;cytoskeleton;cytosol;extracellular organelle;intracellular non-membrane-bounded organelle;intracellular organelle;organelle;vesicle	Neurotrophin signaling pathway;Vasopressin-regulated water reabsorption	16.689	16.5984	16.4564	16.7672	16.6009	16.892	16.8139	16.5578	16.5873	16.4751	16.4192	17.3013	16.3493	16.4353	16.192	16.8144	16.4511	16.5405	16.5362	16.6816	16.7928	16.7551	16.2495	16.8946	16.7977	16.8463	16.7861	16.4151	16.8044	16.2952	16.4251	16.4292
ARL6IP5	O75915	PRA1 family protein 3	0.0963226	-0.0233754	-0.00225157		0.267334	-0.0950222	-0.0254026		0.370317	0.140541	0.0520448		amine transport;amino acid transport;biological regulation;cellular homeostasis;cellular ion homeostasis;cellular process;establishment of localization;homeostatic process;ion transport;organic acid transport;regulation of transport;transport	cell part;endoplasmic reticulum;extracellular organelle;intracellular membrane-bounded organelle;intracellular organelle;membrane;organelle;vesicle		15.1316	15.0705	15.1445	14.9985	15.304	15.0079	15.1119	14.8842	15.2503	15.055	15.1437	15.629	14.6815	14.8633	14.5624	14.9437	14.5735	14.9142	14.891	14.9553	14.8152	14.6978	14.7957	14.9912	14.9759	14.9686	15.345	14.8569	15.0918	14.8894	14.7788	14.6887
ARPC2	O15144	Actin-related protein 2/3 complex subunit 2	0.253026	-0.381707	-0.0965819		1.0007	0.747217	0.747743		0.0873404	0.124789	0.0108991		biological regulation;cellular component movement;cellular component organization;cellular process;cytoskeleton organization;immune system process;locomotion;organelle organization;regulation of organelle organization;response to chemical stimulus;response to external stimulus;response to stimulus;response to stress;signal transduction	cell leading edge;cell part;cell projection;cytoplasm;cytoskeleton;cytosol;endosome;extracellular organelle;Golgi apparatus;intracellular membrane-bounded organelle;intracellular non-membrane-bounded organelle;intracellular organelle;macromolecular complex;membrane;neuron projection;organelle;plasma membrane;protein complex;synapse;vesicle	Bacterial invasion of epithelial cells;Fc gamma R-mediated phagocytosis;Pathogenic Escherichia coli infection;Regulation of actin cytoskeleton;Shigellosis	11.1511	11.3419	11.1779	11.7606	11.3248	10.4007	12.1508	12.4107	12.5072	11.8109	10.8473	12.4564	NaN	NaN	12.3546	NaN	11.757	NaN	NaN	NaN	12.1859	12.7261	11.5197	11.1155	11.7254	12.0835	NaN	12.6315	11.8457	10.847	NaN	NaN
ARVCF	O00192	Armadillo repeat protein deleted in velo-cardio-facial syndrome	0.0294503	-0.0427567	-0.0012592		0.158029	-0.190732	-0.0301412		1.2221	0.969296	1.18458	+	biological adhesion;cell adhesion;cellular process;developmental process;multicellular organismal development;multicellular organismal process	cell part;cytoplasm;intracellular;membrane;nucleoplasm;plasma membrane		12.3369	NaN	NaN	NaN	NaN	12.9577	12.4195	12.321	NaN	NaN	NaN	13.2105	NaN	NaN	NaN	NaN	NaN	NaN	NaN	NaN	12.2825	12.3391	NaN	12.3215	NaN	10.9258	13.016	11.6919	NaN	12.4416	12.307	NaN
ASAH1	Q13510	Acid ceramidase	0.0914126	-0.265486	-0.0242688		0.876277	1.3927	1.22039	+	0.143271	-0.395424	-0.0566528		anatomical structure development;cellular lipid metabolic process;cellular metabolic process;cellular process;developmental process;lipid metabolic process;metabolic process;primary metabolic process;response to chemical stimulus;response to stimulus;small molecule metabolic process	cell part;extracellular organelle;organelle;vesicle	Lysosome;Sphingolipid metabolism	14.2766	14.5392	NaN	14.3271	14.2169	NaN	14.3734	14.1323	14.0011	14.4521	14.3694	14.872	13.8729	NaN	NaN	14.7273	NaN	14.3051	14.4228	13.2946	14.5512	13.8089	NaN	NaN	13.7694	13.9656	14.3419	15.0954	14.5259	NaN	NaN	14.3025
ASB2	Q96Q27	Ankyrin repeat and SOCS box protein 2	0.02191	-0.00912555	-0.000199941		0.568401	0.153663	0.0873425		0.306082	-0.19519	-0.0597443		biological regulation;cell differentiation;cellular metabolic process;cellular process;developmental process;macromolecule metabolic process;macromolecule modification;metabolic process;primary metabolic process;protein metabolic process;protein modification by small protein conjugation or removal;protein modification process;response to stimulus;signal transduction	cell part;macromolecular complex;protein complex;ubiquitin ligase complex		15.2965	15.3115	15.0098	15.2064	15.0646	15.289	15.0686	15.43	14.9554	15.313	15.2858	13.7757	15.3671	15.3956	15.3661	15.5005	15.6779	15.3513	15.0456	14.7598	14.8264	14.7797	14.879	15.1727	15.6601	15.4683	14.872	14.9549	15.0163	14.8328	15.1384	15.1564
ASB4	Q9Y574	Ankyrin repeat and SOCS box protein 4	0.601564	0.23317	0.140266		0.153	-0.101588	-0.015543		0.444794	-0.298991	-0.132989		biological regulation;cellular metabolic process;cellular process;macromolecule metabolic process;macromolecule modification;metabolic process;primary metabolic process;protein metabolic process;protein modification by small protein conjugation or removal;protein modification process;response to stimulus;signal transduction	cell part;macromolecular complex;protein complex;ubiquitin ligase complex		12.3406	12.7552	12.878	12.5564	12.1698	11.9159	12.4242	12.8411	12.304	11.9848	12.6722	11.767	12.3178	12.7508	12.5745	12.5386	13.2809	13.4489	12.93	12.8918	12.8057	12.8319	12.6081	12.9782	12.5092	11.9053	11.6742	11.9896	12.7306	11.9556	12.18	12.9566
ASPH	Q12797	Aspartyl/asparaginyl beta-hydroxylase	0.22292	0.138564	0.0308887		0.0293371	-0.0121692	-0.000357009		0.113037	0.0540648	0.00611131		anatomical structure development;anatomical structure morphogenesis;biological regulation;cellular metabolic process;cellular process;detection of stimulus;developmental process;establishment of localization;ion transport;macromolecule metabolic process;macromolecule modification;metabolic process;multicellular organismal process;muscle contraction;peptidyl-amino acid modification;primary metabol…	cell part;endoplasmic reticulum;intracellular membrane-bounded organelle;intracellular organelle;macromolecular complex;membrane;organelle;plasma membrane;protein complex		14.4073	15.087	14.9538	14.9623	14.4583	14.9882	15.4642	15.3127	15.2376	14.9715	15.4538	15.5406	14.3144	15.1327	14.3121	14.9238	15.2915	15.0123	15.0125	14.5255	15.025	15.1065	14.9318	14.7288	15.4215	15.6054	14.8792	14.6785	15.1333	15.037	15.3271	15.1149
ASPN	Q9BXN1	Asporin	0.0120719	0.0119988	0.000144849		0.884449	-1.73967	-1.53865	+	0.202489	0.246386	0.0498905		anatomical structure development;biological regulation;developmental process	extracellular matrix;proteinaceous extracellular matrix		14.8213	15.6632	17.3608	14.7686	15.4365	15.903	15.1362	15.1641	17.7763	14.8644	14.7669	17.205	14.9378	15.5327	15.0792	NaN	15.962	16.3264	14.9308	14.2667	14.2989	14.7131	16.2763	14.4209	15.2986	15.7152	15.9179	16.0741	16.1482	15.6379	16.5283	15.3831
ASS1	P00966	Argininosuccinate synthase	0.19931	-0.346229	-0.0690068		0.0248228	0.0536044	0.00133061		0.529117	0.992187	0.524982		aging;amine metabolic process;anatomical structure development;biological regulation;biosynthetic process;cellular amide metabolic process;cellular amino acid metabolic process;cellular ketone metabolic process;cellular metabolic process;cellular nitrogen compound metabolic process;cellular process;developmental process;metabolic process;nitrogen compound metabolic process;nitrogen cycle metaboli…	cell part;cell projection;cytoplasm;cytosol;endoplasmic reticulum;extracellular organelle;intracellular membrane-bounded organelle;intracellular organelle;lysosome;membrane;neuron projection;nucleus;organelle;vacuole;vesicle	Alanine, aspartate and glutamate metabolism;Arginine and proline metabolism	NaN	NaN	NaN	NaN	NaN	NaN	13.2086	NaN	13.398	12.9092	13.091	13.9616	13.1511	12.9471	12.6326	NaN	NaN	NaN	12.84	12.3262	13.2795	12.8828	NaN	13.7395	12.3542	13.1532	NaN	NaN	NaN	NaN	11.8873	NaN
ATAD1	Q8NBU5	Outer mitochondrial transmembrane helix translocase	0.0369354	-0.0554028	-0.00204632		0.429792	0.464093	0.199464		0.488811	0.756641	0.369855		behavior;biological regulation;cellular component organization;cellular process;cytoskeleton organization;metabolic process;multicellular organismal process;neurological system process;organelle organization;regulation of transport;response to stimulus	cell part;intracellular membrane-bounded organelle;intracellular organelle;membrane;microbody;mitochondrion;nucleus;organelle		13.6263	13.7671	13.7827	12.8805	NaN	13.6013	13.7469	13.3584	13.3819	12.4806	13.6069	13.8393	13.4625	NaN	11.8195	12.1736	11.445	NaN	11.536	13.418	11.3338	13.6547	NaN	NaN	12.3838	11.4865	NaN	12.2204	NaN	NaN	12.9661	13.5026
ATAD3A	Q9NVI7	ATPase family AAA domain-containing protein 3A	0.0149687	0.0121849	0.000182393		0.448744	0.402802	0.180755		0.896289	-0.976223	-0.874978		biological regulation;cell growth;cellular process;growth	cell part;intracellular membrane-bounded organelle;intracellular non-membrane-bounded organelle;intracellular organelle;membrane;mitochondrion;organelle		12.6526	12.869	13.661	13.0733	13.2203	12.8723	12.824	13.0322	13.1972	13.3938	12.8779	12.8034	12.7893	13.4979	13.012	12.8599	12.6405	NaN	13.4449	13.0947	13.0956	13.1507	13.0515	12.9712	13.85	13.1007	NaN	13.3518	13.0246	NaN	12.2908	12.3304
ATIC	P31939	Bifunctional purine biosynthesis protein ATIC	0.334818	-0.153021	-0.0512343		0.01729	0.0108622	0.000187808		0.128016	0.0726838	0.00930466		anatomical structure development;anatomical structure morphogenesis;biosynthetic process;cellular aromatic compound metabolic process;cellular metabolic process;cellular nitrogen compound metabolic process;cellular process;cofactor metabolic process;developmental process;heterocycle metabolic process;metabolic process;nitrogen compound metabolic process;nucleobase-containing compound metabolic pr…	cell part;cytosol;extracellular organelle;intracellular membrane-bounded organelle;intracellular organelle;membrane;mitochondrion;organelle;vesicle	One carbon pool by folate;Purine metabolism	15.9823	15.7104	15.8029	15.9611	15.7853	15.9729	15.3473	15.276	15.1698	14.9299	15.3051	15.233	15.2142	14.7444	14.8282	15.4062	15.0759	15.3104	15.1903	14.9802	15.1056	14.9394	14.7539	15.1336	15.0058	15.0434	15.0043	15.0929	15.1345	14.73	14.9995	15.067
ATP1A2	P50993	Sodium/potassium-transporting ATPase subunit alpha-2	0.333137	-0.0628751	-0.020946		0.387078	-0.0790178	-0.030586		0.0764982	0.0232226	0.00177649		behavior;biological regulation;cellular homeostasis;cellular ion homeostasis;cellular process;establishment of localization;homeostatic process;hydrogen transport;ion transport;locomotion;multicellular organismal process;muscle contraction;neurological system process;neurotransmitter transport;regulation of transport;response to abiotic stimulus;response to chemical stimulus;response to endogenou…	cell part;cell projection;cytoplasm;endosome;intracellular membrane-bounded organelle;intracellular organelle;macromolecular complex;membrane;neuron projection;organelle;plasma membrane;protein complex;synapse;vesicle	Aldosterone-regulated sodium reabsorption;Bile secretion;Carbohydrate digestion and absorption;Cardiac muscle contraction;Endocrine and other factor-regulated calcium reabsorption;Gastric acid secretion;Mineral absorption;Pancreatic secretion;Protein digestion and absorption;Proximal tubule bicarbonate reclamation;Salivary secretion	15.6379	15.5766	15.5452	15.7191	15.5909	15.5966	15.5022	15.4533	15.4269	15.198	15.2547	15.4978	15.8156	15.4889	15.5729	15.6836	15.5803	15.8049	15.5155	15.291	15.6945	15.5307	15.5936	15.5141	15.2873	15.5272	15.5227	15.5094	15.5209	15.1054	15.4925	15.5367
ATP1B1	P05026	Sodium/potassium-transporting ATPase subunit beta-1	0.28597	0.0390398	0.0111642		0.290825	0.090844	0.0264197		0.197616	-0.0687332	-0.0135828		biological adhesion;biological regulation;cell adhesion;cell motility;cellular component movement;cellular component organization;cellular homeostasis;cellular ion homeostasis;cellular localization;cellular membrane organization;cellular process;coagulation;establishment of localization;homeostatic process;immune system process;ion transport;localization;locomotion;membrane organization;multicell…	cell part;extracellular organelle;macromolecular complex;membrane;organelle;plasma membrane;protein complex;vesicle	Aldosterone-regulated sodium reabsorption;Bile secretion;Carbohydrate digestion and absorption;Cardiac muscle contraction;Endocrine and other factor-regulated calcium reabsorption;Gastric acid secretion;Mineral absorption;Pancreatic secretion;Protein digestion and absorption;Proximal tubule bicarbonate reclamation;Salivary secretion	15.5092	15.4808	15.5318	15.725	15.6194	15.7466	15.363	15.4651	15.2927	15.1316	15.312	15.5175	15.7275	15.6328	15.4234	15.9892	15.6679	15.805	15.4069	15.5686	15.8021	15.6173	15.8004	15.5435	15.5083	15.5451	15.5414	15.6409	15.6336	14.9576	15.5389	15.5956
ATP2A1	O14983	Sarcoplasmic/endoplasmic reticulum calcium ATPase 1	0.37851	-0.187071	-0.070808		0.365538	-0.186294	-0.0680975		0.143417	-0.0574284	-0.00823618		biological regulation;cell death;cellular component organization;cellular homeostasis;cellular ion homeostasis;cellular process;coagulation;death;establishment of localization;homeostatic process;ion transport;mitochondrion organization;multicellular organismal process;organelle organization;regulation of body fluid levels;response to stimulus;response to stress;transmembrane transport;transport	cell part;endoplasmic reticulum;intracellular membrane-bounded organelle;intracellular organelle;macromolecular complex;membrane;organelle;protein complex	Alzheimer's disease;Calcium signaling pathway;Pancreatic secretion	20.415	20.0842	20.4997	20.2259	20.3225	20.333	20.5779	20.5353	20.3901	19.8653	20.4256	19.8728	19.8997	19.5957	19.4897	20.1622	20.0223	20.5718	19.9588	19.6729	19.7715	19.3272	20.3451	20.304	20.0123	19.3906	19.7023	19.8297	20.0787	19.6911	19.8915	20.3541
ATP2A2	P16615	Sarcoplasmic/endoplasmic reticulum calcium ATPase 2	0.003487	-0.00123628	-4.31091e-06		0.926038	0.301266	0.278984		0.359698	-0.13925	-0.0500879		anatomical structure development;biological adhesion;biological regulation;cell adhesion;cellular homeostasis;cellular ion homeostasis;cellular process;coagulation;developmental process;establishment of localization;homeostatic process;ion transport;multicellular organismal process;regulation of body fluid levels;response to stimulus;response to stress;signal transduction;transmembrane transport;…	cell part;endoplasmic reticulum;intracellular membrane-bounded organelle;intracellular organelle;membrane;organelle	Alzheimer's disease;Calcium signaling pathway;Pancreatic secretion	19.6797	19.6125	18.9667	19.6286	19.6622	19.7084	19.457	19.2214	19.0673	19.5037	19.4686	19.3781	19.777	19.5699	19.8989	19.5671	19.1988	18.8332	19.1652	19.7598	19.6399	19.9585	19.0742	19.1462	19.6768	19.7138	19.2085	19.3215	19.3634	18.7391	19.5833	19.4543
ATP5F1A	P25705	ATP synthase subunit alpha, mitochondrial	0.639078	0.26215	0.167534		0.394568	0.23959	0.0945345		0.286204	-0.135833	-0.0388761		biological regulation;biosynthetic process;cellular metabolic process;cellular nitrogen compound metabolic process;cellular process;developmental process;embryo development;establishment of localization;generation of precursor metabolites and energy;heterocycle metabolic process;hydrogen transport;ion transport;lipid metabolic process;metabolic process;nitrogen compound metabolic process;nucleoba…	cell part;extracellular organelle;intracellular membrane-bounded organelle;intracellular organelle;macromolecular complex;membrane;mitochondrion;organelle;plasma membrane;protein complex;proton-transporting two-sector ATPase complex;vesicle	Alzheimer's disease;Huntington's disease;Oxidative phosphorylation;Parkinson's disease	18.7351	19.0398	18.5029	18.6613	19.0298	18.9411	18.9868	19.2486	19.4929	19.4049	19.3905	19.0982	19.8164	19.88	19.7036	19.9374	19.8416	19.6908	19.2994	19.6631	19.4134	19.4872	18.9485	19.1919	19.192	19.4088	18.4855	19.2414	19.1902	18.5817	19.4565	19.8188
ATP5F1B	P06576	ATP synthase subunit beta, mitochondrial	0.307954	0.109227	0.033637		0.482466	0.184634	0.0890797		1.03115	-0.275031	-0.283598		anatomical structure formation involved in morphogenesis;biological regulation;biosynthetic process;cell differentiation;cellular component organization;cellular homeostasis;cellular ion homeostasis;cellular metabolic process;cellular nitrogen compound metabolic process;cellular process;developmental process;establishment of localization;generation of precursor metabolites and energy;heterocycle …	cell part;cell surface;extracellular organelle;intracellular membrane-bounded organelle;intracellular non-membrane-bounded organelle;intracellular organelle;macromolecular complex;membrane;mitochondrion;nucleus;organelle;plasma membrane;protein complex;proton-transporting two-sector ATPase complex;vesicle	Alzheimer's disease;Huntington's disease;Oxidative phosphorylation;Parkinson's disease	18.9797	19.0494	18.7669	18.98	19.1983	19.1552	19.265	19.307	19.5096	19.5084	19.5344	19.1639	19.7771	19.7148	19.5837	19.6918	19.5134	19.2746	19.446	19.6488	19.5981	19.6812	19.3094	19.405	19.3901	19.6709	18.9328	19.4996	19.5324	18.4958	19.5046	19.6268
ATP5F1C	P36542	ATP synthase subunit gamma, mitochondrial	0.621946	0.239896	0.149202		0.33176	0.108697	0.0360613		0.202984	-0.0890516	-0.0180761		biosynthetic process;cellular metabolic process;cellular nitrogen compound metabolic process;cellular process;establishment of localization;generation of precursor metabolites and energy;heterocycle metabolic process;hydrogen transport;ion transport;metabolic process;nitrogen compound metabolic process;nucleobase-containing compound metabolic process;nucleobase-containing small molecule metabolic…	cell part;extracellular organelle;intracellular membrane-bounded organelle;intracellular organelle;macromolecular complex;membrane;mitochondrion;organelle;protein complex;proton-transporting two-sector ATPase complex;vesicle	Alzheimer's disease;Huntington's disease;Oxidative phosphorylation;Parkinson's disease	17.2594	17.2651	17.4972	17.2423	17.3587	17.6064	17.3945	17.7239	17.8082	17.9336	18.0253	17.7052	18.1584	18.0413	17.6566	18.0616	18.2115	17.8242	17.3757	17.9839	17.6158	17.553	17.3538	17.3049	17.3511	17.5543	17.3054	17.5298	17.4553	17.2672	17.6913	18.1013
ATP5F1D	P30049	ATP synthase subunit delta, mitochondrial	0.176692	0.404976	0.0715561		0.319538	-0.698875	-0.223317		0.0150163	-0.0058953	-8.85254e-05		biosynthetic process;cellular metabolic process;cellular nitrogen compound metabolic process;cellular process;establishment of localization;generation of precursor metabolites and energy;heterocycle metabolic process;hydrogen transport;ion transport;metabolic process;nitrogen compound metabolic process;nucleobase-containing compound metabolic process;nucleobase-containing small molecule metabolic…	cell part;intracellular membrane-bounded organelle;intracellular organelle;macromolecular complex;membrane;mitochondrion;organelle;protein complex;proton-transporting two-sector ATPase complex	Alzheimer's disease;Huntington's disease;Oxidative phosphorylation;Parkinson's disease	16.5439	13.4413	16.1663	NaN	16.4206	16.6684	16.3305	16.7964	16.6741	16.9335	16.6104	16.5314	16.4752	16.7252	16.515	16.9227	16.5867	16.4801	16.81	16.915	16.6363	17.1501	16.6726	16.6786	16.5317	17.2429	16.3695	16.2943	16.3661	16.6762	NaN	16.3143
ATP5MF	P56134	ATP synthase subunit f, mitochondrial	0.502021	0.370632	0.186065		0.177998	0.140138	0.0249443		0.121069	-0.111788	-0.0135341		biosynthetic process;cellular metabolic process;cellular nitrogen compound metabolic process;cellular process;establishment of localization;generation of precursor metabolites and energy;heterocycle metabolic process;hydrogen transport;ion transport;metabolic process;nitrogen compound metabolic process;nucleobase-containing compound metabolic process;nucleobase-containing small molecule metabolic…	cell part;extracellular organelle;intracellular membrane-bounded organelle;intracellular organelle;macromolecular complex;membrane;nucleus;organelle;protein complex;proton-transporting two-sector ATPase complex;vesicle	Oxidative phosphorylation	16.3404	16.4069	17.0859	16.8555	16.5996	17.7918	17.9617	17.9788	18.1521	18.223	18.7347	18.0109	17.7218	18.0021	17.5074	17.9811	17.7032	17.3341	17.0832	18.1411	17.6356	17.2698	17.2285	16.8767	17.4299	17.5965	17.1839	17.033	17.5963	16.9173	17.2525	17.8878
ATP5MG	O75964	ATP synthase subunit g, mitochondrial	0.0489237	-0.0296747	-0.0014518		0.196998	0.141131	0.0278026		0.508194	-1.25116	-0.63583		biosynthetic process;cellular metabolic process;cellular nitrogen compound metabolic process;cellular process;establishment of localization;generation of precursor metabolites and energy;heterocycle metabolic process;hydrogen transport;ion transport;metabolic process;nitrogen compound metabolic process;nucleobase-containing compound metabolic process;nucleobase-containing small molecule metabolic…	cell part;extracellular organelle;intracellular membrane-bounded organelle;intracellular organelle;macromolecular complex;membrane;mitochondrion;organelle;protein complex;proton-transporting two-sector ATPase complex;vesicle	Oxidative phosphorylation	15.5663	15.237	15.6562	15.2858	15.7859	16.1069	15.8982	16.0587	16.1769	16.273	16.4822	15.8756	16.1046	15.52	15.991	16.6381	16.4102	15.9964	15.6578	16.4279	15.5981	15.3634	15.7053	15.4447	15.5124	15.3716	15.3312	15.3258	15.5885	NaN	16.0551	16.0012
ATP5MK	Q96IX5	ATP synthase membrane subunit K, mitochondrial	0.365936	0.237032	0.0867385		0.158755	0.072018	0.0114332		0.137811	-0.0940415	-0.01296			cell part;extracellular organelle;macromolecular complex;organelle;protein complex;proton-transporting two-sector ATPase complex;vesicle		15.2344	15.0004	16.0232	15.6425	15.4257	15.9372	16.2196	15.9598	16.3841	16.4521	16.3692	16.2251	16.3959	16.3529	16.0244	16.28	16.0291	15.9026	15.8859	16.5697	15.9904	16.0331	15.5112	15.0041	15.6946	16.3524	15.4736	15.7181	15.7963	15.0251	15.7564	16.3738
ATP5PB	P24539	ATP synthase F(0) complex subunit B1, mitochondrial	0.595089	0.240344	0.143026		0.311705	0.160104	0.0499053		0.876023	-1.01882	-0.892509		anatomical structure development;biosynthetic process;cellular metabolic process;cellular nitrogen compound metabolic process;cellular process;developmental process;establishment of localization;generation of precursor metabolites and energy;heterocycle metabolic process;hydrogen transport;ion transport;metabolic process;nitrogen compound metabolic process;nucleobase-containing compound metabolic…	cell part;extracellular organelle;intracellular membrane-bounded organelle;intracellular organelle;macromolecular complex;membrane;mitochondrion;nucleoplasm;nucleus;organelle;protein complex;proton-transporting two-sector ATPase complex;vesicle	Alzheimer's disease;Huntington's disease;Oxidative phosphorylation;Parkinson's disease	15.7127	16.0324	15.6035	14.9638	15.632	15.7978	15.6582	16.0185	15.5414	16.0805	15.7752	15.7351	16.0893	16.1923	15.7334	16.1626	15.982	15.6291	16.0173	15.9106	15.5994	15.8499	15.7981	NaN	15.1113	15.2857	15.2786	15.1021	15.6898	14.5402	15.606	16.1975
ATP5PD	O75947	ATP synthase subunit d, mitochondrial	0.248911	0.211327	0.0526016		0.429155	-0.786487	-0.337525		0.168488	-0.353747	-0.0596021		biosynthetic process;cellular metabolic process;cellular nitrogen compound metabolic process;cellular process;establishment of localization;generation of precursor metabolites and energy;heterocycle metabolic process;hydrogen transport;ion transport;metabolic process;nitrogen compound metabolic process;nucleobase-containing compound metabolic process;nucleobase-containing small molecule metabolic…	cell part;cytoplasm;extracellular organelle;intracellular membrane-bounded organelle;intracellular organelle;macromolecular complex;membrane;mitochondrion;nucleoplasm;organelle;protein complex;proton-transporting two-sector ATPase complex;vesicle	Alzheimer's disease;Huntington's disease;Oxidative phosphorylation;Parkinson's disease	15.1269	14.8525	13.6337	13.4771	14.1666	14.3471	13.6234	14.8641	12.9255	15.1424	14.6792	13.4709	15.5321	15.4848	15.0193	15.5955	15.5943	15.2476	14.1245	14.4455	14.671	13.4648	NaN	13.3541	14.5229	13.9289	14.1367	NaN	14.2409	NaN	14.3741	14.996
ATP5PF	P18859	ATP synthase-coupling factor 6, mitochondrial	0.597694	0.651853	0.389609		0.203802	0.288586	0.0588144		0.127469	0.296356	0.0377762		anatomical structure development;biosynthetic process;cellular metabolic process;cellular nitrogen compound metabolic process;cellular process;developmental process;establishment of localization;generation of precursor metabolites and energy;heterocycle metabolic process;hydrogen transport;ion transport;metabolic process;nitrogen compound metabolic process;nucleobase-containing compound metabolic…	cell part;intracellular membrane-bounded organelle;intracellular organelle;macromolecular complex;membrane;mitochondrion;organelle;protein complex;proton-transporting two-sector ATPase complex	Alzheimer's disease;Huntington's disease;Oxidative phosphorylation;Parkinson's disease	13.6487	13.2122	NaN	13.5321	NaN	13.6588	NaN	13.0293	13.7153	13.2057	13.3741	13.6353	14.0835	14.4259	14.2658	14.679	14.5375	14.6691	13.1942	13.7897	13.9843	13.0892	12.9727	NaN	13.8634	13.8553	12.8457	13.4529	NaN	NaN	13.3086	14.6104
ATP5PO	P48047	ATP synthase subunit O, mitochondrial	0.0144805	0.0121206	0.000175512		0.34822	0.269732	0.0939259		0.0300527	-0.0210004	-0.000631118		biosynthetic process;cellular metabolic process;cellular nitrogen compound metabolic process;cellular process;establishment of localization;generation of precursor metabolites and energy;heterocycle metabolic process;hydrogen transport;ion transport;metabolic process;nitrogen compound metabolic process;nucleobase-containing compound metabolic process;nucleobase-containing small molecule metabolic…	cell part;extracellular organelle;intracellular membrane-bounded organelle;intracellular organelle;macromolecular complex;membrane;mitochondrion;nucleus;organelle;plasma membrane;protein complex;proton-transporting two-sector ATPase complex;vesicle	Alzheimer's disease;Huntington's disease;Oxidative phosphorylation;Parkinson's disease	14.2809	14.2806	14.251	14.6416	14.5677	15.1411	15.1616	14.4381	15.2651	15.3006	15.2982	14.6984	15.5825	15.4615	15.2545	15.9887	15.9003	15.2939	14.9847	15.1867	15.2864	14.7742	14.4002	15.0336	14.9949	15.254	13.8471	14.9109	15.0292	14.7223	15.2006	15.657
AZGP1	P25311	Zinc-alpha-2-glycoprotein	0.791862	0.412855	0.326924		0.37051	0.428725	0.158847		0.0389941	0.0482152	0.00188011		biological adhesion;biological regulation;cell adhesion;cellular process;detection of stimulus;establishment of localization;homeostatic process;immune system process;protein transport;response to chemical stimulus;response to stimulus;transmembrane transport;transport	cell part;extracellular organelle;extracellular region;extracellular space;intracellular membrane-bounded organelle;intracellular organelle;macromolecular complex;membrane;MHC protein complex;nucleus;organelle;plasma membrane;protein complex;vesicle		16.1709	16.4187	16.2002	16.064	15.9047	16.0296	15.5823	16.3148	15.3822	16.005	16.5674	16.5587	15.637	15.4013	16.3402	17.6908	16.2464	16.4978	15.8519	15.7533	15.367	15.1103	15.2435	16.3994	14.9406	16.1424	16.3367	17.9217	15.2129	14.1256	16.1434	16.7728
BAG2	O95816	BAG family molecular chaperone regulator 2	1.63879	1.49476	2.4496	+	0.0185346	0.0394484	0.000731162		0.397441	0.523982	0.208252		cellular metabolic process;cellular process;macromolecule metabolic process;metabolic process;primary metabolic process;protein folding;protein metabolic process;response to abiotic stimulus;response to heat;response to stimulus;response to stress	cell part;cytosol	Protein processing in endoplasmic reticulum	10.7751	13.5636	NaN	NaN	13.0079	NaN	NaN	12.353	12.2112	12.9409	12.4514	12.2944	13.0171	13.0743	12.9056	13.9821	13.2499	13.9395	13.1852	13.4139	NaN	NaN	NaN	11.8117	NaN	13.4325	12.6314	NaN	NaN	12.7453	NaN	12.3796
BAG3	O95817	BAG family molecular chaperone regulator 3	1.18923	0.118044	0.140381		0.314725	0.0733121	0.0230731		0.888519	0.333302	0.296146		anatomical structure development;biological regulation;cellular metabolic process;cellular process;developmental process;macromolecule metabolic process;metabolic process;primary metabolic process;protein folding;protein metabolic process;regulation of protein stability;response to abiotic stimulus;response to external stimulus;response to heat;response to stimulus;response to stress	cell part;cell projection;cytoplasm;cytosol;membrane;neuron projection;plasma membrane		18.6659	18.7602	18.5826	18.7138	18.4847	18.4103	18.6403	18.8244	18.8229	18.9721	18.6139	19.7728	18.564	18.744	18.6988	18.6904	18.3981	18.7915	18.8244	18.8372	18.4075	18.7601	18.4816	18.7444	18.8184	18.8238	19.0437	18.8004	18.3634	18.6227	18.5017	18.7334
BANF1	O75531	Barrier-to-autointegration factor	1.66191	0.635075	1.05544		0.352072	-0.450421	-0.158581		0.548515	0.525263	0.288114		cell cycle;cellular component disassembly;cellular component organization;cellular membrane organization;cellular metabolic process;cellular nitrogen compound metabolic process;cellular process;DNA integration;DNA metabolic process;macromolecule metabolic process;membrane organization;metabolic process;mitotic cell cycle;multi-organism process;nitrogen compound metabolic process;nucleobase-contai…	cell part;chromosome;cytoplasm;cytosol;extracellular organelle;intracellular membrane-bounded organelle;intracellular non-membrane-bounded organelle;intracellular organelle;nucleoplasm;nucleus;organelle;vesicle		12.515	13.6008	14.0738	12.5391	12.2721	13.697	13.4825	13.4867	14.029	14.3986	12.991	15.0982	12.4197	13.7359	12.6237	13.2376	13.8141	13.9337	12.7024	13.1187	12.5271	11.0936	13.2936	12.8094	12.2811	12.8945	13.2246	12.2514	12.338	12.3823	12.4787	12.8533
BCAM	P50895	Basal cell adhesion molecule	0.17886	0.0444749	0.00795479		0.19521	-0.0319255	-0.00623217		0.493585	0.191148	0.0943478		biological adhesion;biological regulation;cell adhesion;cellular process;response to stimulus;signal transduction	cell part;extracellular organelle;membrane;organelle;plasma membrane;vesicle		15.8484	15.9798	15.7715	15.6405	15.8704	15.5016	15.6998	15.7599	15.9193	15.8595	15.5484	16.5804	15.643	16.0788	15.8081	15.7787	15.8337	15.6643	15.9863	15.7209	15.664	15.7784	15.5258	16.0749	15.6521	15.8948	15.7613	15.9635	15.94	15.6918	15.8645	15.5267
BCKDHA	P12694	2-oxoisovalerate dehydrogenase subunit alpha, mitochondrial	0.312879	0.147515	0.0461542		0.161358	-0.0566427	-0.00913973		0.408983	0.0943201	0.0385754		amine metabolic process;catabolic process;cellular amino acid metabolic process;cellular ketone metabolic process;cellular metabolic process;cellular nitrogen compound metabolic process;cellular process;metabolic process;nitrogen compound metabolic process;organic acid metabolic process;primary metabolic process;small molecule metabolic process	cell part;intracellular membrane-bounded organelle;intracellular organelle;macromolecular complex;mitochondrion;organelle;protein complex;tricarboxylic acid cycle enzyme complex	Valine, leucine and isoleucine degradation	16.3326	16.4347	16.2461	16.1083	16.3312	16.0813	15.9017	15.9008	16.0701	15.9716	15.8499	16.1892	16.3508	15.8729	16.4779	16.3287	16.1055	16.0675	16.1719	16.1432	16.5117	16.3856	15.8553	16.3565	15.8447	16.4365	16.2872	16.213	16.1941	16.2921	15.2194	15.918
BCKDK	O14874	[3-methyl-2-oxobutanoate dehydrogenase [lipoamide]] kinase, mitochondrial	0.320884	-0.177159	-0.0568477		0.143025	0.0757915	0.0108401		0.298574	-0.175907	-0.0525214		amine metabolic process;catabolic process;cellular amino acid metabolic process;cellular ketone metabolic process;cellular metabolic process;cellular nitrogen compound metabolic process;cellular process;macromolecule metabolic process;macromolecule modification;metabolic process;nitrogen compound metabolic process;organic acid metabolic process;phosphorus metabolic process;primary metabolic proce…	cell part;intracellular membrane-bounded organelle;intracellular organelle;macromolecular complex;mitochondrion;organelle;protein complex;tricarboxylic acid cycle enzyme complex		14.013	14.4753	14.879	13.7935	14.0903	14.3083	14.3151	13.8856	14.4284	14.2001	14.5079	14.6421	14.947	14.6906	14.3357	14.5987	14.6596	14.6731	14.9254	14.6956	14.473	14.6667	14.3313	14.4271	14.869	15.0591	14.2805	14.9522	14.8415	13.2818	15.1168	14.3173
BCL2L13	Q9BXK5	Bcl-2-like protein 13	0.128071	0.0371238	0.00475447		0.655805	0.158815	0.104152		0.289782	0.105134	0.0304659		biological regulation;cell death;cellular process;death	cell part;intracellular membrane-bounded organelle;intracellular organelle;membrane;mitochondrion;nucleus;organelle		14.9602	14.8494	14.9839	15.1817	15.3724	15.3346	15.2526	15.1787	15.2568	15.2264	15.1926	15.5678	15.2731	14.8492	15.1427	15.5328	14.8759	15.2555	14.8207	15.2347	15.315	15.2348	14.9202	15.0753	14.7751	14.9895	14.9243	15.0117	14.8865	14.6781	14.9276	15.1307
BCLAF1	Q9NYF8	Bcl-2-associated transcription factor 1	0.279549	-0.151676	-0.0424009		0.425457	-0.247582	-0.105336		0.202693	0.0706724	0.0143248		biological regulation;biosynthetic process;cell death;cellular metabolic process;cellular nitrogen compound metabolic process;cellular process;death;macromolecule metabolic process;metabolic process;nitrogen compound metabolic process;nucleobase-containing compound metabolic process;primary metabolic process;response to stimulus;response to stress;RNA metabolic process	cell part;cytoplasm;intracellular membrane-bounded organelle;intracellular non-membrane-bounded organelle;intracellular organelle;nucleolus;nucleoplasm;nucleus;organelle		14.2044	14.1283	14.6371	14.3498	14.5051	14.0195	14.0249	14.3764	14.8281	14.4461	14.2883	14.0295	14.1683	13.4024	14.6933	14.8611	14.3815	14.5506	14.7379	14.6507	13.7471	13.4047	14.1677	14.722	14.0097	13.5515	15.0037	14.4838	14.3502	14.3016	13.8776	14.0036
BDH1	Q02338	D-beta-hydroxybutyrate dehydrogenase, mitochondrial	0.17057	0.155041	0.0264452		0.359339	0.224175	0.0805548		0.333997	-0.200543	-0.0669808		anatomical structure development;biosynthetic process;catabolic process;cellular ketone body metabolic process;cellular lipid metabolic process;cellular metabolic process;cellular process;developmental process;lipid metabolic process;metabolic process;primary metabolic process;response to chemical stimulus;response to drug;response to endogenous stimulus;response to external stimulus;response to …	cell part;cytoplasm;intracellular membrane-bounded organelle;intracellular organelle;membrane;mitochondrion;nucleoplasm;organelle	Butanoate metabolism;Synthesis and degradation of ketone bodies	15.0483	15.2143	15.2472	14.9766	15.3647	15.435	15.6066	15.283	15.5167	15.9894	15.6742	14.3754	16.6293	16.5898	16.2363	16.3878	15.9013	15.6941	16.0395	16.5694	16.0895	16.4672	15.1502	15.758	16.2733	16.7431	15.6821	16.224	16.0503	15.841	15.7678	15.8955
BGN	P21810	Biglycan	0.0632021	0.0396787	0.00250778		0.46358	-0.268471	-0.124458		0.0663361	0.0502431	0.00333293		amine metabolic process;biosynthetic process;carbohydrate metabolic process;catabolic process;cellular component organization;cellular metabolic process;cellular process;extracellular matrix organization;extracellular structure organization;macromolecule metabolic process;macromolecule modification;metabolic process;multicellular organismal process;nitrogen compound metabolic process;peptidyl-ami…	cell part;cell surface;cytoplasmic membrane-bounded vesicle;extracellular matrix;extracellular organelle;extracellular region;intracellular membrane-bounded organelle;intracellular organelle;membrane;organelle;plasma membrane;proteinaceous extracellular matrix;vesicle		16.4026	17.112	16.773	16.6806	16.3362	16.5595	16.4719	16.0618	17.6406	16.6181	16.642	17.7022	16.16	16.8576	16.1548	16.2831	17.0476	16.1461	16.493	16.4915	16.5831	16.549	16.6054	16.4661	16.7351	16.9622	17.5658	17.2394	17.312	16.7067	16.9351	15.9507
BIN1	O00499	Myc box-dependent-interacting protein 1	0.28532	0.0589457	0.0168184		0.000104757	1.71661e-05	1.79828e-09		0.32363	0.086044	0.0278464		biological regulation;cell differentiation;cell proliferation;cellular component assembly;cellular component organization;cellular macromolecular complex assembly;cellular membrane organization;cellular process;developmental process;endocytosis;establishment of localization;macromolecular complex assembly;membrane invagination;membrane organization;regulation of cell cycle;regulation of transport…	cell part;cell projection;cytoplasm;cytoplasmic membrane-bounded vesicle;cytoskeleton;intracellular membrane-bounded organelle;intracellular non-membrane-bounded organelle;intracellular organelle;macromolecular complex;membrane;neuron projection;nucleus;organelle;vesicle		18.7663	18.7302	18.6954	18.768	18.7781	19.097	18.9257	19.1296	18.8778	18.8414	19.0396	19.2459	18.7134	18.7674	18.6543	18.8334	18.9262	18.7253	18.8018	18.7182	18.9827	18.7439	18.689	18.7381	18.6985	18.6945	18.7463	18.8358	18.9041	18.7749	18.5079	18.7274
BLMH	Q13867	Bleomycin hydrolase	0.503128	0.835315	0.420271		0.435002	1.04341	0.453886		0.774505	-0.263572	-0.204138		cellular metabolic process;cellular process;immune system process;macromolecule metabolic process;macromolecule modification;metabolic process;primary metabolic process;protein metabolic process;protein modification by small protein conjugation or removal;protein modification process;proteolysis;response to chemical stimulus;response to drug;response to stimulus	cell part;cytoplasm;cytosol;extracellular organelle;intracellular membrane-bounded organelle;intracellular organelle;nucleoplasm;nucleus;organelle;vesicle		17.1165	16.9564	16.6147	16.5696	16.8535	16.7613	16.7457	17.0534	16.9612	16.6845	16.7535	16.2923	16.3034	16.4414	17.0284	16.6744	16.8579	16.8719	NaN	16.5384	16.5088	16.8042	16.7091	16.8303	16.7418	16.5418	16.8802	17.2702	16.6924	15.7555	16.3715	16.7837
BLVRA	P53004	Biliverdin reductase A	0.0177098	0.00747649	0.000132407		0.241539	-0.0805955	-0.0194669		0.0573716	0.0316532	0.001816		catabolic process;cellular metabolic process;cellular nitrogen compound metabolic process;cellular process;cofactor metabolic process;heterocycle metabolic process;metabolic process;nitrogen compound metabolic process;pigment metabolic process;small molecule metabolic process	cell part;cytosol;extracellular organelle;organelle;vesicle	Porphyrin and chlorophyll metabolism	15.4779	15.6527	15.5002	15.5423	15.3106	15.3015	15.7072	15.4849	15.6088	15.5058	15.5662	15.4878	15.2684	15.1183	15.1267	15.6781	14.9827	15.0687	14.9535	15.329	15.2984	15.1361	15.4908	15.5445	15.355	15.0513	15.6104	14.9814	14.9018	15.1239	15.4459	15.6165
BLVRB	P30043	Flavin reductase (NADPH)	0.657648	0.220059	0.144721		0.211461	0.0794703	0.0168049		0.307003	0.125491	0.0385261		catabolic process;cellular metabolic process;cellular nitrogen compound metabolic process;cellular process;cofactor metabolic process;heterocycle metabolic process;metabolic process;nitrogen compound metabolic process;pigment metabolic process;small molecule metabolic process	cell part;cytoplasm;cytosol;extracellular organelle;membrane;nucleoplasm;organelle;plasma membrane;vesicle	Porphyrin and chlorophyll metabolism;Riboflavin metabolism	16.3417	16.9104	16.7742	16.9753	16.6284	16.286	17.0505	16.9579	16.9166	17.0044	17.1188	17.0201	16.2385	16.5409	16.6649	17.3002	16.1231	16.6206	16.6934	16.7121	16.5165	16.4584	16.2034	16.5969	16.5456	16.5162	16.6028	16.4848	16.5885	16.8192	16.7269	17.2796
BPHL	Q86WA6	Valacyclovir hydrolase	0.186313	0.211142	0.0393384		0.113147	-0.171538	-0.0194091		0.162023	-0.135115	-0.0218917		amine metabolic process;cellular amino acid metabolic process;cellular ketone metabolic process;cellular metabolic process;cellular nitrogen compound metabolic process;cellular process;metabolic process;nitrogen compound metabolic process;organic acid metabolic process;primary metabolic process;response to chemical stimulus;response to stimulus;small molecule metabolic process	cell part;extracellular organelle;intracellular membrane-bounded organelle;intracellular organelle;mitochondrion;organelle;vesicle		10.9391	9.86049	NaN	11.0453	11.1224	10.7348	11.1245	11.3616	10.869	11.7023	10.34	11.5646	11.8629	11.3105	10.8736	8.95924	11.2653	NaN	NaN	NaN	10.4616	10.6846	10.7782	10.0278	9.48374	NaN	NaN	8.93709	10.3422	NaN	10.2728	NaN
BSG	P35613	Basigin	0.314252	-0.228502	-0.0718072		0.038435	0.0205539	0.00078999		0.32943	-0.147196	-0.0484908		anatomical structure development;anatomical structure morphogenesis;biological regulation;cell motility;cellular component disassembly;cellular component movement;cellular component organization;cellular ketone metabolic process;cellular metabolic process;cellular process;coagulation;developmental process;establishment of localization;extracellular matrix organization;extracellular structure orga…	cell part;cytoplasmic membrane-bounded vesicle;extracellular organelle;intracellular membrane-bounded organelle;intracellular organelle;membrane;mitochondrion;organelle;plasma membrane;vesicle		16.4909	16.2159	16.8572	16.5165	16.5079	16.2565	15.9677	16.384	16.5235	16.4009	16.4254	15.713	17.23	16.9397	16.4723	16.9512	16.7386	16.6891	16.4495	16.6326	17.0829	16.9289	17.0569	16.4852	16.8137	17.0116	16.1116	16.5155	16.312	16.6621	16.8698	15.2667
BZW2	Q9Y6E2	eIF5-mimic protein 1	0.0236886	-0.0884042	-0.00209417		0.0200133	0.0796266	0.00159359		0.708827	-1.33467	-0.946049		anatomical structure development;cell differentiation;cellular process;developmental process	cell part;membrane		15.6027	14.8115	15.6204	15.3407	15.531	15.3961	15.5015	15.7989	NaN	14.9761	15.9064	14.0925	15.1814	15.6114	15.3465	15.2171	15.7727	15.1413	NaN	NaN	NaN	15.1717	14.2183	13.8593	14.8688	NaN	15.3221	NaN	14.4585	NaN	NaN	14.6474
C11orf54	Q9H0W9	Ester hydrolase C11orf54	0.257549	-0.0928771	-0.0239204		0.599476	0.256758	0.15392		0.323646	-0.148814	-0.0481629		metabolic process	cell part;extracellular organelle;intracellular membrane-bounded organelle;intracellular organelle;nucleus;organelle;vesicle		15.2088	14.8667	15.4625	14.9028	15.3759	15.274	14.7691	14.9152	14.7752	15.0347	14.9885	14.8713	15.2617	14.7889	14.7806	15.4351	15.557	15.2023	14.962	14.4354	14.8193	14.8594	14.9264	15.3049	14.4652	15.0873	14.0456	14.8473	15.0391	14.3984	14.7696	14.7858
C19orf47	Q8N9M1	Uncharacterized protein C19orf47	0.197402	0.773871	0.152764		0.271708	-0.998542	-0.271312		0.0360852	-0.121867	-0.0043976			cell part;nucleoplasm		15.4885	15.593	15.3065	NaN	15.9172	15.556	NaN	16.0013	15.1474	NaN	15.7732	16.1646	16.1897	15.7815	15.9451	15.9358	16.0374	NaN	15.1318	16.3014	14.9901	NaN	NaN	15.635	NaN	NaN	NaN	16.1427	15.6148	15.5473	NaN	NaN
C1QBP	Q07021	Complement component 1 Q subcomponent-binding protein, mitochondrial	0.752745	0.18658	0.140448		0.0500586	0.0152656	0.000764175		0.480885	0.141293	0.0679459		biological regulation;biosynthetic process;cell death;cellular component assembly;cellular component organization;cellular macromolecular complex assembly;cellular metabolic process;cellular nitrogen compound metabolic process;cellular process;coagulation;death;immune system process;macromolecular complex assembly;macromolecule metabolic process;metabolic process;mRNA metabolic process;mRNA proce…	cell part;cell surface;cytoplasm;cytosol;extracellular space;intracellular membrane-bounded organelle;intracellular non-membrane-bounded organelle;intracellular organelle;membrane;mitochondrion;nucleolus;nucleus;organelle;plasma membrane		15.8698	15.976	15.9687	15.9923	16.0171	16.0776	15.9288	16.1262	16.1628	16.0422	15.7874	16.5987	16.2773	16.2954	16.1984	16.3024	16.2357	16.3099	15.7728	15.9373	16.2194	16.2175	15.9091	16.083	16.1496	16.6314	16.1018	16.4515	16.4649	15.9835	15.9951	16.1465
C1QC	P02747	Complement C1q subcomponent subunit C	0.704554	1.38377	0.974937		0.104687	-0.381044	-0.0398905		0.0397067	-0.139341	-0.00553275		biological regulation;immune system process;macromolecule metabolic process;metabolic process;primary metabolic process;protein metabolic process;response to stimulus;response to stress	extracellular organelle;extracellular region;extracellular space;organelle;vesicle	Chagas disease (American trypanosomiasis);Complement and coagulation cascades;Prion diseases;Staphylococcus aureus infection;Systemic lupus erythematosus	NaN	NaN	NaN	NaN	NaN	NaN	14.4311	15.3428	15.1062	15.3756	14.8929	15.6019	NaN	15.7099	15.1241	15.0644	NaN	NaN	14.873	14.9082	NaN	15.1449	14.8824	14.6802	NaN	15.1073	15.6227	NaN	15.3635	14.725	15.0376	14.6735
C3	P01024	Complement C3	0.91383	0.35408	0.323568		0.220915	-0.0944144	-0.0208575		0.299913	0.17225	0.05166		biological regulation;cellular ketone metabolic process;cellular lipid metabolic process;cellular metabolic process;cellular process;immune system process;lipid metabolic process;macromolecule metabolic process;metabolic process;organic acid metabolic process;primary metabolic process;protein metabolic process;regulation of protein modification process;regulation of transport;response to stimulus…	cell part;extracellular organelle;extracellular region;extracellular space;membrane;organelle;plasma membrane;vesicle	Chagas disease (American trypanosomiasis);Complement and coagulation cascades;ko05152;Leishmaniasis;Phagosome;Staphylococcus aureus infection;Systemic lupus erythematosus	16.0543	17.2855	16.9454	16.9599	16.2398	16.4086	17.1831	16.6843	16.4435	16.8937	17.118	17.403	16.3881	16.4558	16.8957	16.9692	15.8895	16.2271	16.2881	16.6595	16.6537	16.4002	16.4285	16.2168	16.4107	16.8049	16.6424	16.0001	16.2183	16.3857	16.6732	17.2319
C4A	P0C0L4	Complement C4-A	0.156351	-0.227368	-0.0355492		0.959242	-0.839155	-0.804953		0.143425	-0.205894	-0.0295304		biological regulation;immune system process;macromolecule metabolic process;metabolic process;primary metabolic process;protein metabolic process;regulation of transport;response to stimulus;response to stress	cell part;extracellular organelle;extracellular region;membrane;organelle;plasma membrane;vesicle	Complement and coagulation cascades;Staphylococcus aureus infection;Systemic lupus erythematosus	NaN	13.1245	12.7193	11.2953	NaN	NaN	13.2648	11.7432	12.9759	12.7208	12.9848	13.0765	NaN	NaN	11.5458	NaN	NaN	NaN	NaN	NaN	10.9742	NaN	NaN	NaN	NaN	NaN	12.466	NaN	NaN	NaN	11.5824	12.6165
C4B	P0C0L5	Complement C4-B	0.0296737	0.0549502	0.00163058		0.717957	0.800667	0.574845		1.31172	1.45221	1.9049	+				12.8131	14.1728	11.623	13.0407	NaN	13.538	13.9378	12.9552	13.286	13.6717	13.6948	12.7662	NaN	NaN	NaN	13.0096	NaN	12.5337	12.9799	12.1573	NaN	12.1165	NaN	NaN	12.5533	13.3403	13.4118	13.24	NaN	11.9348	13.3396	13.7864
C4orf54	D6RIA3	Uncharacterized protein C4orf54	1.54828	0.213658	0.330802		1.71169	0.230674	0.394843		2.60203	0.252023	0.655771					17.3926	17.6118	17.4272	17.6165	17.2722	17.6398	17.5316	17.7032	17.7827	17.859	17.4514	17.6165	17.2469	17.7176	17.4364	17.561	17.4724	17.4461	17.7839	17.751	17.4552	17.964	17.3479	17.7204	17.3664	17.7739	17.5665	17.774	17.3409	17.7678	17.4972	17.5431
C6orf136	Q5SQH8	Uncharacterized protein C6orf136	0.161966	0.224312	0.036331		0.736116	-0.740888	-0.545379		0.00816561	-0.00942977	-7.69998e-05			cell part;intracellular membrane-bounded organelle;intracellular organelle;mitochondrion;organelle		10.1693	NaN	NaN	9.54018	9.37612	10.2472	10.5088	9.07496	11.6569	12.2509	11.592	9.27037	10.5724	10.9123	10.69	11.7245	10.2273	NaN	8.96846	11.7258	11.0271	10.0281	10.2857	10.6457	10.655	11.6053	10.8658	9.73594	10.7463	10.5995	10.8152	9.21513
CA1	P00915	Carbonic anhydrase 1	0.795078	0.518934	0.412593		0.176723	0.115071	0.0203358		0.222529	0.211161	0.0469895		cellular metabolic process;cellular process;establishment of localization;ion transport;metabolic process;one-carbon metabolic process;small molecule metabolic process;transport	cell part;cytosol;extracellular organelle;organelle;vesicle	Nitrogen metabolism	17.2271	19.3429	18.5507	19.0246	17.8287	17.8753	19.0751	18.5135	17.9325	18.8173	19.1498	18.5526	18.0771	18.1596	18.6348	19.521	17.4104	17.44	17.9947	18.948	18.7227	18.3586	17.471	17.3989	18.6856	18.5437	18.9106	18.1401	17.4741	19.1392	18.7571	19.4227
CA2	P00918	Carbonic anhydrase 2	0.662211	0.153034	0.101341		0.303802	0.0996482	0.0302734		0.405503	-0.0969286	-0.0393049		anatomical structure development;anatomical structure morphogenesis;biological regulation;cellular homeostasis;cellular ion homeostasis;cellular metabolic process;cellular process;developmental process;establishment of localization;homeostatic process;ion transport;metabolic process;one-carbon metabolic process;regulation of transport;response to abiotic stimulus;response to chemical stimulus;res…	apical part of cell;cell part;cell projection;cytoplasm;cytosol;extracellular organelle;extracellular space;membrane;microvillus;neuron projection;organelle;plasma membrane;vesicle	Nitrogen metabolism	16.6402	17.1713	16.8082	16.9893	16.5107	16.7262	17.0185	16.8393	16.4231	16.8479	16.9402	16.8572	16.7631	16.802	17.0311	17.3811	16.9108	16.5415	16.5539	17.0442	16.7485	16.6577	16.5668	16.2842	17.0446	16.825	16.7611	16.6564	16.628	16.6987	16.9842	17.2408
CA3	P07451	Carbonic anhydrase 3	0.0473872	0.0102043	0.000483554		0.683281	0.14126	0.0965199		0.153955	0.0623455	0.00959841		cellular metabolic process;cellular process;establishment of localization;ion transport;metabolic process;one-carbon metabolic process;response to chemical stimulus;response to oxidative stress;response to stimulus;response to stress;small molecule metabolic process;transport	cell part;cytosol	Nitrogen metabolism	21.5342	21.5174	21.3301	21.7589	21.6363	21.7224	21.7169	21.7589	21.4702	21.7574	21.6879	22.0277	21.4917	21.4785	21.5317	21.4849	21.3601	21.3568	21.8097	21.8626	21.9258	21.9535	21.7711	21.9639	21.6238	21.6116	21.675	21.7775	21.6866	21.2538	21.6745	21.6831
CA4	P22748	Carbonic anhydrase 4	0.0571741	0.0374988	0.00214396		0.517642	0.507281	0.26259		0.0535753	0.0389584	0.00208721		anatomical structure development;cellular metabolic process;cellular process;developmental process;establishment of localization;ion transport;metabolic process;one-carbon metabolic process;response to chemical stimulus;response to drug;response to endogenous stimulus;response to stimulus;small molecule metabolic process;transport	cell part;cell surface;endoplasmic reticulum;extracellular organelle;Golgi apparatus;intracellular membrane-bounded organelle;intracellular organelle;membrane;organelle;plasma membrane;vesicle	Nitrogen metabolism	15.5526	15.4174	15.4875	14.9998	14.8478	15.153	15.4154	14.974	14.9806	15.463	15.3764	15.7353	15.4805	15.5246	15.4994	15.6843	15.3143	14.8883	15.0879	15.0677	15.2889	15.5797	14.6274	15.4851	14.8458	14.529	14.9881	15.0812	14.9755	14.9368	14.561	15.6556
CAB39	Q9Y376	Calcium-binding protein 39	0.63216	0.299801	0.189522		0.205908	0.147071	0.030283		0.302439	-0.400345	-0.12108		biological regulation;cellular component assembly;cellular component organization;cellular process;macromolecular complex assembly;protein complex assembly;regulation of cell cycle;regulation of protein modification process;regulation of transport;response to abiotic stimulus;response to chemical stimulus;response to endogenous stimulus;response to osmotic stress;response to stimulus;response to …	cell part;cytosol;extracellular organelle;organelle;vesicle	mTOR signaling pathway	14.6328	15.2742	15.1755	14.7372	14.7802	14.8076	14.6976	14.9307	14.9554	15.0779	14.9665	15.237	15.1662	15.1787	15.0463	15.3737	15.5508	15.4369	13.9345	15.0735	14.3778	14.4299	13.6761	14.3467	14.3305	14.1971	13.6884	14.1807	14.5779	11.9977	14.7158	14.622
CACNA1S	Q13698	Voltage-dependent L-type calcium channel subunit alpha-1S	0.0555692	0.0239131	0.00132883		0.884068	-0.178102	-0.157455		0.410337	-0.0680567	-0.0279262		anatomical structure development;anatomical structure formation involved in morphogenesis;cell development;cellular component organization;cellular process;developmental process;endoplasmic reticulum organization;establishment of localization;ion transport;locomotion;multicellular organismal process;muscle adaptation;muscle contraction;organelle organization;response to chemical stimulus;response…	cell part;cytoplasm;endoplasmic reticulum;intracellular membrane-bounded organelle;intracellular organelle;macromolecular complex;membrane;organelle;plasma membrane;protein complex;voltage-gated calcium channel complex	Alzheimer's disease;Arrhythmogenic right ventricular cardiomyopathy (ARVC);Calcium signaling pathway;Cardiac muscle contraction;Dilated cardiomyopathy;GnRH signaling pathway;Hypertrophic cardiomyopathy (HCM);MAPK signaling pathway;Vascular smooth muscle contraction	17.0351	16.7374	17.2871	17.0984	17.0855	17.1274	17.3069	17.4153	16.913	17.1751	17.2603	16.9819	17.3156	17.2216	17.2792	17.2231	17.2996	17.423	17.1082	17.0168	17.152	16.7483	17.1579	17.1498	16.9224	16.8189	17.092	16.92	17.1274	17.0764	16.5789	17.2007
CACNA2D1	P54289	Voltage-dependent calcium channel subunit alpha-2/delta-1	0.250028	-0.0737136	-0.0184305		0.542864	-0.0840206	-0.0456118		0.288648	0.0712981	0.02058		biological regulation;cellular process;establishment of localization;ion transport;regulation of transport;transmembrane transport;transport	cell part;endoplasmic reticulum;extracellular organelle;intracellular membrane-bounded organelle;intracellular organelle;macromolecular complex;organelle;protein complex;vesicle;voltage-gated calcium channel complex	Arrhythmogenic right ventricular cardiomyopathy (ARVC);Cardiac muscle contraction;Dilated cardiomyopathy;Hypertrophic cardiomyopathy (HCM);MAPK signaling pathway	16.1522	16.1351	16.1099	16.0103	16.1667	16.3608	16.0059	16.0462	15.9094	15.7714	15.8593	16.1772	15.7544	15.6793	15.7739	16.0643	15.9971	16.1573	15.8049	15.7371	15.9296	15.7753	15.9583	15.9291	15.8901	15.4442	15.933	15.7003	15.9827	15.6713	15.8813	16.0046
CACNB1	Q02641	Voltage-dependent L-type calcium channel subunit beta-1	0.869991	0.343357	0.298717		0.0372173	0.016247	0.000604667		0.139419	0.0478654	0.00667336		cell communication;cell-cell signaling;cellular component organization;cellular process;establishment of localization;locomotion;protein targeting;protein transport;response to chemical stimulus;response to external stimulus;response to stimulus;signaling;transport	cell part;endoplasmic reticulum;intracellular membrane-bounded organelle;intracellular organelle;macromolecular complex;organelle;protein complex;voltage-gated calcium channel complex	Arrhythmogenic right ventricular cardiomyopathy (ARVC);Cardiac muscle contraction;Dilated cardiomyopathy;Hypertrophic cardiomyopathy (HCM);MAPK signaling pathway	14.4827	14.4972	14.2855	14.5712	14.5378	14.8753	14.5649	14.3935	14.5273	14.6367	14.728	14.8686	14.6891	14.5737	14.5118	14.1268	14.8127	14.6687	14.0485	14.825	13.8722	14.0956	14.8971	14.5166	14.4588	14.8789	14.5263	14.1828	14.574	14.3677	13.3985	14.5342
CACNG1	Q06432	Voltage-dependent calcium channel gamma-1 subunit	0.907407	-0.238568	-0.216478		0.543291	-0.187693	-0.101972		0.120981	0.0540449	0.00653843		establishment of localization;ion transport;multicellular organismal process;muscle contraction;transport	cell part;macromolecular complex;protein complex;voltage-gated calcium channel complex	Arrhythmogenic right ventricular cardiomyopathy (ARVC);Cardiac muscle contraction;Dilated cardiomyopathy;Hypertrophic cardiomyopathy (HCM);MAPK signaling pathway	14.6069	14.5792	14.6584	14.6307	13.9865	14.8154	14.2929	14.0524	14.4731	13.9749	13.8606	14.3904	14.1783	14.241	14.1439	14.5142	14.4583	14.2385	14.3869	13.6469	14.4245	14.3092	14.6013	14.4067	14.5184	14.1207	14.4005	14.3674	14.5858	13.9987	14.4157	14.3275
CACYBP	Q9HB71	Calcyclin-binding protein	0.0470864	0.0430838	0.00202866		0.27425	0.294634	0.0808035		0.0995845	-0.12809	-0.0127558		aging;biological regulation;cell differentiation;cellular process;developmental process;regulation of DNA metabolic process;response to chemical stimulus;response to endogenous stimulus;response to stimulus	cell body;cell part;cell projection;cytoplasm;extracellular organelle;macromolecular complex;neuron projection;nucleoplasm;organelle;protein complex;vesicle	Wnt signaling pathway	12.5445	13.3023	NaN	13.0021	12.2551	12.1881	12.5355	13.3037	12.9367	13.1105	13.2037	13.809	12.5174	11.6957	13.0453	13.0702	13.2576	NaN	12.5839	12.8967	13.1547	13.1302	12.7334	NaN	13.1008	NaN	13.4629	12.8714	11.2932	13.1318	12.3949	13.0339
CALD1	Q05682	Caldesmon	0.318244	0.156859	0.0499195		0.179106	0.0614244	0.0110015		0.326683	0.169559	0.0553919		cellular component movement;cellular process;multicellular organismal process;muscle contraction	cell part;cytoskeleton;cytosol;intracellular non-membrane-bounded organelle;intracellular organelle;membrane;organelle;plasma membrane	Vascular smooth muscle contraction	12.8043	13.2579	12.8083	13.1128	12.9341	12.9058	12.6435	12.9205	13.3292	12.9271	12.9443	13.6647	13.2735	13.7872	12.9762	13.034	13.5654	13.351	13.7085	13.2891	12.8994	13.304	13.2388	13.4077	13.0531	13.4727	13.2769	13.5735	13.8203	13.0496	13.0759	12.7726
CALR	P27797	Calreticulin	0.0446227	-0.0111392	-0.000497063		0.461919	-0.0748587	-0.0345786		0.388263	0.163219	0.063372		aging;biological regulation;carbohydrate metabolic process;cell differentiation;cellular component assembly;cellular component organization;cellular homeostasis;cellular ion homeostasis;cellular localization;cellular macromolecular complex assembly;cellular membrane organization;cellular metabolic process;cellular process;cytoskeleton organization;developmental process;endocytosis;establishment o…	cell part;cell surface;cytoplasm;cytoplasmic membrane-bounded vesicle;cytosol;endoplasmic reticulum;extracellular matrix;extracellular organelle;extracellular region;extracellular space;Golgi apparatus;intracellular;intracellular membrane-bounded organelle;intracellular organelle;macromolecular complex;membrane;MHC class I peptide loading complex;nucleus;organelle;polysome;protein complex;protein…	Antigen processing and presentation;Chagas disease (American trypanosomiasis);Phagosome;Protein processing in endoplasmic reticulum	16.1489	15.8623	15.9523	16.0524	16.0532	15.8018	16.0929	16.05	16.1296	16.0847	15.9151	16.8685	15.8318	15.757	15.8495	16.014	15.6841	15.9027	15.9839	15.8757	16.2114	16.0812	15.8274	15.9384	15.8664	16.1542	16.0734	15.8371	15.9198	15.59	16.0387	16.1967
CALU	O43852	Calumenin	0.526046	0.123458	0.0649446		0.237892	0.0454556	0.0108135		0.68986	0.160626	0.110809		biological regulation;cell activation;cellular process;coagulation;establishment of localization;exocytosis;multicellular organismal process;regulation of body fluid levels;secretion;transport;vesicle-mediated transport	cell part;cytoplasmic membrane-bounded vesicle;endoplasmic reticulum;extracellular region;Golgi apparatus;intracellular membrane-bounded organelle;intracellular organelle;membrane;organelle;vesicle		16.1926	16.2913	15.9471	16.2048	16.0564	15.9864	16.1597	16.3726	16.354	16.4403	16.3203	16.1479	16.2403	16.1553	16.2339	16.3109	15.7737	16.4043	15.9689	16.0169	16.167	16.1115	16.0376	16.2094	15.5986	16.049	16.2885	16.2962	16.375	16.2439	16.1207	16.1365
CAMK2A	Q9UQM7	Calcium/calmodulin-dependent protein kinase type II subunit alpha	0.541836	-0.282816	-0.15324		0.124804	-0.0317248	-0.00395938		0.317244	-0.0911764	-0.0289252		biological regulation;cell communication;cell-cell signaling;cellular metabolic process;cellular process;establishment of localization;ion transport;macromolecule metabolic process;macromolecule modification;metabolic process;peptidyl-amino acid modification;phosphorus metabolic process;primary metabolic process;protein metabolic process;protein modification process;protein phosphorylation;regula…	cell part;cytosol;intracellular membrane-bounded organelle;intracellular organelle;membrane;mitochondrion;nucleoplasm;nucleus;organelle;plasma membrane	Calcium signaling pathway;ErbB signaling pathway;Gastric acid secretion;Glioma;GnRH signaling pathway;ko05152;Long-term potentiation;Melanogenesis;Neurotrophin signaling pathway;Olfactory transduction;Oocyte meiosis;Phototransduction - fly;Wnt signaling pathway	16.3066	16.444	16.4825	16.3124	16.4741	16.6144	16.4074	16.5961	16.3048	16.1576	16.5564	16.068	16.1613	15.4805	15.9316	16.0845	16.0783	15.9843	16.3144	16.1231	16.437	16.1929	16.2886	16.4326	17.4386	16.1798	16.1002	16.2022	16.486	16.1752	16.2857	16.3936
CAMK2B	Q13554	Calcium/calmodulin-dependent protein kinase type II subunit beta	1.34383	0.46766	0.628456		0.479819	0.179252	0.0860084		0.144287	0.0883153	0.0127428		biological regulation;cell communication;cell-cell signaling;cellular metabolic process;cellular process;establishment of localization;ion transport;macromolecule metabolic process;macromolecule modification;metabolic process;multicellular organismal process;neurological system process;peptidyl-amino acid modification;phosphorus metabolic process;primary metabolic process;protein metabolic proces…	cell part;cytosol;membrane;microtubule organizing center;nucleoplasm;plasma membrane	Calcium signaling pathway;ErbB signaling pathway;Gastric acid secretion;Glioma;GnRH signaling pathway;ko05152;Long-term potentiation;Melanogenesis;Neurotrophin signaling pathway;Olfactory transduction;Oocyte meiosis;Phototransduction - fly;Wnt signaling pathway	15.1299	15.1496	14.3823	15.2605	15.3845	15.3518	15.6149	15.6389	15.1628	15.3403	15.6896	15.8031	14.3791	15.4066	14.7639	15.1226	14.9778	14.8355	15.1338	15.61	15.4575	15.2156	14.372	14.9057	14.6662	15.2319	15.1641	15.408	15.1494	14.9723	14.5766	15.2696
CAMK2D	Q13557	Calcium/calmodulin-dependent protein kinase type II subunit delta	0.292752	-0.0974212	-0.0285202		0.14389	-0.0431492	-0.00620872		0.147968	0.106204	0.0157148		biological regulation;cell communication;cell growth;cell-cell signaling;cellular component assembly;cellular component organization;cellular homeostasis;cellular ion homeostasis;cellular metabolic process;cellular process;developmental process;establishment of localization;growth;homeostatic process;ion transport;macromolecular complex assembly;macromolecule metabolic process;macromolecule modif…	cell body;cell part;cytoplasm;cytosol;intracellular membrane-bounded organelle;intracellular organelle;macromolecular complex;membrane;neuronal cell body;nucleoplasm;nucleus;organelle;plasma membrane;protein complex;synapse	Calcium signaling pathway;ErbB signaling pathway;Gastric acid secretion;Glioma;GnRH signaling pathway;ko05152;Long-term potentiation;Melanogenesis;Neurotrophin signaling pathway;Olfactory transduction;Oocyte meiosis;Phototransduction - fly;Wnt signaling pathway	15.2894	15.0281	15.205	15.2896	14.9025	15.0477	15.1282	15.6532	15.3202	15.3145	15.9382	16.2478	15.0292	14.9016	14.7905	15.1265	14.9187	15.0702	15.1027	15.1354	15.2613	15.0218	14.8866	14.9954	15.6119	15.0702	15.6	15.2667	14.9119	14.6572	15.1298	14.9181
CAMK2G	Q13555	Calcium/calmodulin-dependent protein kinase type II subunit gamma	0.120375	0.0621626	0.0074828		3.83444	0.334109	1.28112	+	0.0200457	0.0108393	0.000217281		anatomical structure development;biological regulation;cell communication;cell differentiation;cell-cell signaling;cellular component assembly;cellular component organization;cellular metabolic process;cellular process;developmental process;establishment of localization;hormone transport;ion transport;macromolecular complex assembly;macromolecule metabolic process;macromolecule modification;metab…	cell part;cytosol;membrane;nucleoplasm;plasma membrane	Calcium signaling pathway;ErbB signaling pathway;Gastric acid secretion;Glioma;GnRH signaling pathway;ko05152;Long-term potentiation;Melanogenesis;Neurotrophin signaling pathway;Olfactory transduction;Oocyte meiosis;Phototransduction - fly;Wnt signaling pathway	14.8095	14.8425	14.4182	14.9182	14.3575	14.7693	14.9951	15.2138	14.432	14.7484	15.331	14.7073	14.5807	14.5947	14.5407	14.7737	14.3517	14.5732	14.249	14.7682	14.6418	14.9302	14.8455	14.6378	15.3783	14.964	14.4858	14.8964	14.885	15.1742	14.4792	14.4815
CAND1	Q86VP6	Cullin-associated NEDD8-dissociated protein 1	0.695689	0.238113	0.165653		0.934769	0.215886	0.201804		0.245324	-0.499726	-0.122595		biological regulation;cell differentiation;cellular component assembly;cellular component organization;cellular macromolecular complex assembly;cellular metabolic process;cellular process;developmental process;macromolecular complex assembly;macromolecule metabolic process;macromolecule modification;metabolic process;primary metabolic process;protein complex assembly;protein metabolic process;pro…	cell part;cytoplasm;extracellular organelle;intracellular membrane-bounded organelle;intracellular organelle;macromolecular complex;membrane;nucleoplasm;nucleus;organelle;protein complex;ubiquitin ligase complex;vesicle		15.6293	15.7538	15.5781	15.5658	15.0654	15.6732	15.6676	15.3055	15.4483	15.9185	15.3697	15.9746	15.7336	16.1137	15.5506	15.9688	15.1271	NaN	15.2722	16.2913	15.1088	15.632	15.5075	15.4826	15.7584	15.4936	15.7525	15.423	15.3564	15.8418	15.5537	16.0857
CAND2	O75155	Cullin-associated NEDD8-dissociated protein 2	0.154191	0.0590434	0.00910393		0.462633	0.24425	0.112998		0.910959	-0.363566	-0.331194		biological regulation;biosynthetic process;cellular component assembly;cellular component organization;cellular macromolecular complex assembly;cellular metabolic process;cellular nitrogen compound metabolic process;cellular process;macromolecular complex assembly;macromolecule metabolic process;macromolecule modification;metabolic process;nitrogen compound metabolic process;nucleobase-containing…	cell part;intracellular;intracellular membrane-bounded organelle;intracellular organelle;nucleus;organelle		14.9807	14.9563	14.1317	14.8968	14.8382	15.2546	15.5215	15.4276	14.7702	15.1896	15.5435	15.1993	15.713	15.5358	15.4754	15.5588	15.6012	15.1736	15.2757	15.3945	15.542	15.3127	15.4993	15.4198	15.459	15.4971	15.4845	15.4169	15.4606	14.2408	14.9911	15.484
CANX	P27824	Calnexin	0.162628	-0.0743221	-0.0120869		0.467531	-0.0921699	-0.0430922		0.603303	0.302059	0.182233		aging;carbohydrate metabolic process;cellular component organization;cellular membrane organization;cellular metabolic process;cellular process;developmental process;endocytosis;establishment of localization;immune system process;macromolecule metabolic process;macromolecule modification;membrane invagination;membrane organization;metabolic process;peptidyl-amino acid modification;primary metabol…	cell body;cell part;cell projection;cytoplasmic membrane-bounded vesicle;endoplasmic reticulum;extracellular organelle;intracellular membrane-bounded organelle;intracellular non-membrane-bounded organelle;intracellular organelle;macromolecular complex;membrane;neuron projection;neuronal cell body;organelle;protein complex;ribonucleoprotein complex;ribosome;vesicle	Antigen processing and presentation;Phagosome;Protein processing in endoplasmic reticulum	15.1184	14.4291	14.9305	14.7691	14.8166	14.9435	14.3954	14.953	14.6518	14.4843	14.8271	15.6242	14.3996	14.1065	14.6889	14.8422	14.7146	14.9136	14.7419	14.7851	14.8302	14.895	13.7023	14.6104	15.0151	14.8644	15.0907	14.8034	15.1641	14.8774	14.6182	14.7046
CAP1	Q01518	Adenylyl cyclase-associated protein 1	0.738376	0.275589	0.203488		0.277737	-0.075036	-0.0208403		0.216575	0.0770623	0.0166898		biological regulation;cell activation;cell motility;cellular component movement;cellular component organization;cellular membrane organization;cellular process;coagulation;cytoskeleton organization;endocytosis;establishment of localization;establishment or maintenance of cell polarity;exocytosis;locomotion;membrane invagination;membrane organization;multicellular organismal process;organelle orga…	cell part;cytoskeleton;extracellular organelle;intracellular non-membrane-bounded organelle;intracellular organelle;membrane;organelle;plasma membrane;vesicle		14.7046	15.2207	14.7477	14.8134	14.9565	14.6708	14.4166	14.9171	15.0727	14.9299	14.7068	15.2882	15.2269	14.9853	14.972	14.7004	14.9215	14.5187	15.0773	14.7201	14.9324	14.9791	14.7159	15.2644	14.0355	15.1102	14.8991	14.8283	14.7741	14.5969	14.6631	14.8242
CAP2	P40123	Adenylyl cyclase-associated protein 2	0.415322	-0.163017	-0.0677045		0.183528	-0.0664673	-0.0121986		0.0898542	-0.028815	-0.00258914		biological regulation;cellular component organization;cellular process;cytoskeleton organization;establishment or maintenance of cell polarity;locomotion;organelle organization;response to chemical stimulus;response to external stimulus;response to stimulus;signal transduction	cell part;membrane;plasma membrane		18.8455	18.6769	18.7181	18.7536	18.8203	18.5574	18.6415	18.4165	18.3458	18.1297	18.4015	18.5483	18.5686	18.2395	18.3022	18.2672	18.5092	18.5208	18.6627	18.593	18.68	18.7455	18.6088	18.6988	17.8901	17.8614	18.184	18.3432	18.2293	18.094	18.5506	18.3936
CAPN1	P07384	Calpain-1 catalytic subunit	0.00340534	-0.000823975	-2.80591e-06		1.28657	0.144035	0.185312		0.565577	-0.107545	-0.0608248		biological regulation;catabolic process;cellular component disassembly;cellular component organization;cellular metabolic process;cellular process;extracellular matrix organization;extracellular structure organization;macromolecule metabolic process;metabolic process;primary metabolic process;protein metabolic process;proteolysis	cell part;cytoplasm;cytosol;extracellular organelle;membrane;organelle;plasma membrane;vesicle	Alzheimer's disease;Apoptosis;Protein processing in endoplasmic reticulum	15.8549	15.764	15.6251	15.98	15.9634	15.9117	15.8015	15.8618	15.6113	15.7197	15.7527	15.5923	15.6705	15.6592	15.5909	15.8542	15.5628	15.5675	15.543	15.4571	15.5808	15.5869	15.614	15.4785	15.6884	15.6033	15.6143	15.8385	15.7813	15.4409	15.6994	15.9073
CAPN2	P17655	Calpain-2 catalytic subunit	0.608657	-0.095939	-0.0583939		0.157932	-0.0602296	-0.0095122		0.361042	0.133526	0.0482085		anatomical structure development;anatomical structure formation involved in morphogenesis;biological regulation;cellular process;developmental process;macromolecule metabolic process;metabolic process;primary metabolic process;protein maturation;protein metabolic process;proteolysis;proteolysis involved in cellular protein catabolic process;regulation of organelle organization;response to chemica…	cell part;cell projection;cytoplasm;cytoskeleton;cytosol;endoplasmic reticulum;extracellular organelle;Golgi apparatus;intracellular membrane-bounded organelle;intracellular non-membrane-bounded organelle;intracellular organelle;membrane;neuron projection;nucleus;organelle;plasma membrane;pseudopodium;vesicle	Alzheimer's disease;Apoptosis;Focal adhesion;Protein processing in endoplasmic reticulum	15.5057	15.3937	15.4987	15.5896	15.4299	15.2866	15.4897	15.4519	15.4157	15.5494	15.6029	16.128	15.3002	15.1787	14.9955	15.1004	15.1011	15.3575	15.3831	15.4485	15.7058	15.6609	15.118	15.3562	15.3165	15.228	15.7771	15.2728	15.4658	15.2462	15.3217	15.0404
CAPN3	P20807	Calpain-3	0.0195899	0.00957362	0.000187547		0.19327	0.0541763	0.0104707		0.516038	-0.241627	-0.124689		anatomical structure development;anatomical structure formation involved in morphogenesis;biological regulation;cell death;cellular component assembly;cellular component organization;cellular homeostasis;cellular localization;cellular membrane organization;cellular process;cytoskeleton organization;death;developmental process;homeostatic process;localization;macromolecular complex assembly;macrom…	cell part;cytoplasm;cytosol;intracellular;intracellular membrane-bounded organelle;intracellular non-membrane-bounded organelle;intracellular organelle;macromolecular complex;membrane;nucleus;organelle;plasma membrane;protein complex		16.9007	16.3148	16.8654	16.9518	17.1447	16.2541	16.6196	16.3974	16.793	16.7041	16.3421	15.7267	15.9412	16.5249	16.751	16.5794	16.4292	16.3531	16.9216	16.5511	16.5929	16.7467	16.6445	16.9677	16.2846	16.7975	16.2175	16.5196	16.763	16.9147	16.4055	16.5448
CAPNS1	P04632	Calpain small subunit 1	0.125967	0.304971	0.0384163		0.299011	-0.353703	-0.105761		0.0784154	0.0498204	0.00390669		biological regulation;cellular component disassembly;cellular component organization;cellular process;extracellular matrix organization;extracellular structure organization;macromolecule metabolic process;metabolic process;primary metabolic process;protein metabolic process;proteolysis	cell part;cytoplasm;cytosol;extracellular organelle;membrane;organelle;plasma membrane;vesicle		13.039	NaN	14.598	14.207	14.0644	14.5543	14.7351	14.5549	14.93	14.3784	14.7914	14.6779	NaN	13.9329	13.6239	14.794	14.1473	14.6262	14.1043	14.725	14.9369	NaN	14.1234	14.651	14.432	14.1395	13.7735	13.747	14.3855	13.4503	14.8349	15.1301
CAPZA1	P52907	F-actin-capping protein subunit alpha-1	0.0362153	-0.0116819	-0.000423063		0.541074	-0.14339	-0.0775845		0.663299	0.327282	0.217085		biological regulation;cellular component assembly;cellular component movement;cellular component organization;cellular process;coagulation;immune system process;macromolecular complex assembly;multicellular organismal process;protein complex assembly;regulation of body fluid levels;regulation of organelle organization;response to stimulus;response to stress	cell part;cytoskeleton;cytosol;extracellular organelle;extracellular region;F-actin capping protein complex;intracellular non-membrane-bounded organelle;intracellular organelle;macromolecular complex;organelle;protein complex;vesicle		17.1348	17.3642	17.4987	17.3511	17.0795	16.9934	17.3555	17.3099	17.2998	17.1966	17.0162	18.529	17.0157	16.9684	17.0257	17.0943	16.9935	17.4159	16.8254	16.8058	16.8566	16.8779	17.0468	17.0861	17.1816	16.986	17.3489	16.9751	16.8434	16.9863	17.0971	17.1058
CAPZA2	P47755	F-actin-capping protein subunit alpha-2	0.71705	-0.0691277	-0.049568		0.0176593	-0.00341447	-6.02972e-05		0.303244	-0.0494544	-0.0149968		biological regulation;cellular component assembly;cellular component movement;cellular component organization;cellular process;coagulation;immune system process;macromolecular complex assembly;multicellular organismal process;protein complex assembly;regulation of body fluid levels;regulation of organelle organization;response to stimulus;response to stress	cell part;cytoskeleton;cytosol;extracellular organelle;extracellular region;F-actin capping protein complex;intracellular non-membrane-bounded organelle;intracellular organelle;macromolecular complex;membrane;organelle;protein complex;vesicle		19.4366	19.4974	19.3183	19.1596	19.4316	19.3664	19.395	19.3288	19.222	19.3433	19.2071	19.08	19.4148	19.3249	19.4064	19.3032	19.2564	19.3306	19.4663	19.1717	19.1735	19.2617	19.2166	19.3683	19.4129	19.4755	19.0764	19.3623	19.3783	19.2483	19.4444	19.357
CAPZB	P47756	F-actin-capping protein subunit beta	0.922562	-0.0820653	-0.0757103		0.400946	0.0490249	0.0196563		0.0362455	-0.00709756	-0.000257255		biological regulation;cellular component movement;cellular component organization;cellular process;coagulation;cytoskeleton organization;multicellular organismal process;organelle organization;regulation of body fluid levels;regulation of organelle organization	cell part;cytoskeleton;cytosol;extracellular organelle;F-actin capping protein complex;intracellular non-membrane-bounded organelle;intracellular organelle;macromolecular complex;organelle;protein complex;vesicle		21.2875	21.3649	21.2872	21.2667	21.4191	21.3447	21.2919	21.2266	21.1451	21.3454	21.1119	21.3042	21.3532	21.2716	21.3839	21.2325	21.1399	21.1887	21.328	21.1249	21.2532	21.306	21.3687	21.4439	21.5009	21.2708	21.1297	21.3977	21.2808	21.1748	21.2493	21.2596
CARNS1	A5YM72	Carnosine synthase 1	0.113739	-0.139539	-0.015871		0.111477	-0.180686	-0.0201422		0.280278	0.459596	0.128815		amine metabolic process;biosynthetic process;cellular amino acid metabolic process;cellular ketone metabolic process;cellular metabolic process;cellular nitrogen compound metabolic process;cellular process;metabolic process;nitrogen compound metabolic process;organic acid metabolic process;primary metabolic process;small molecule metabolic process		Arginine and proline metabolism;beta-Alanine metabolism;Histidine metabolism	NaN	NaN	12.9111	12.0505	12.3299	12.336	12.1835	13.0326	12.6963	13.1724	12.2299	13.3439	12.8334	NaN	12.1543	NaN	NaN	13.4319	NaN	11.6911	NaN	12.0103	NaN	11.3409	NaN	NaN	NaN	NaN	NaN	NaN	NaN	NaN
CASP14	P31944	Caspase-14	0.0877442	-0.230708	-0.0202433		0.0339932	-0.0851207	-0.00289353		0.37212	-0.611964	-0.227724		anatomical structure development;biological regulation;cell death;cellular process;death;developmental process;response to DNA damage stimulus;response to stimulus;response to stress;signal transduction	cell part;cytoplasm;extracellular organelle;intracellular membrane-bounded organelle;intracellular organelle;macromolecular complex;nucleus;organelle;protein complex;vesicle		13.7079	NaN	NaN	NaN	12.7599	14.2144	13.2038	15.1547	13.5841	13.9855	14.7583	NaN	13.6227	NaN	13.8216	15.298	14.5951	14.4257	NaN	13.886	13.688	NaN	13.9946	14.2983	13.6117	13.3392	14.3538	15.6203	13.3786	NaN	14.3916	14.7601
CASQ1	P31415	Calsequestrin-1	0.0092037	-0.00312869	-2.87955e-05		0.155103	-0.0429471	-0.00666124		0.260499	0.0855885	0.0222957		anatomical structure development;biological regulation;cellular component assembly;cellular component organization;cellular macromolecular complex assembly;cellular process;cytoskeleton organization;developmental process;endoplasmic reticulum organization;establishment of localization;ion transport;macromolecular complex assembly;organelle organization;protein complex assembly;protein polymerizat…	cell part;endoplasmic reticulum;Golgi apparatus;intracellular membrane-bounded organelle;intracellular organelle;membrane;mitochondrion;organelle		23.0714	23.197	23.0183	23.02	22.9586	23.0625	23.1451	23.0388	22.9169	22.7073	22.8207	23.0401	22.8042	22.6233	22.6099	22.6554	22.7148	22.9136	22.7635	22.8538	23.0016	22.9009	22.9382	23.1216	22.6636	22.74	22.7564	23.1119	22.8478	22.3204	22.7919	22.7682
CASQ2	O14958	Calsequestrin-2	0.274351	0.119884	0.0328904		0.410786	0.209636	0.0861158		0.086565	0.0570793	0.00494107		biological regulation;cellular component assembly;cellular component organization;cellular homeostasis;cellular ion homeostasis;cellular macromolecular complex assembly;cellular process;cytoskeleton organization;detection of stimulus;establishment of localization;homeostatic process;ion transport;macromolecular complex assembly;multicellular organismal process;muscle contraction;organelle organiz…	cell part;cytoplasm;endoplasmic reticulum;intracellular;intracellular membrane-bounded organelle;intracellular organelle;macromolecular complex;membrane;organelle;protein complex		18.2803	18.4752	17.7776	18.3334	18.2666	18.4923	18.2651	18.1999	18.0187	18.5353	18.6215	18.3949	18.8359	18.844	18.7401	18.4919	18.4088	17.933	18.3213	18.6417	18.9026	18.6987	17.5725	18.3676	18.2024	18.6617	18.4286	18.7014	18.4585	18.1132	18.0431	17.8447
CAST	P20810	Calpastatin	0.471583	0.16641	0.0784763		0.230795	0.103643	0.0239203		0.230566	-0.134474	-0.0310051		biological regulation	cell part;cytoplasm;cytosol;membrane		13.7705	14.638	14.4053	14.592	14.0788	14.0322	14.3531	14.7478	14.9211	14.4281	15.067	14.9732	14.4373	13.9735	14.3104	14.833	14.1064	13.809	14.5063	14.5081	14.0656	14.1699	14.0215	13.9044	14.6337	14.5203	13.8201	14.4388	14.1946	13.88	14.294	14.6057
CAT	P04040	Catalase	0.927971	0.445669	0.413568		0.651501	0.31099	0.20261		0.292091	0.141597	0.0413592		aging;alcohol metabolic process;anatomical structure development;biological regulation;catabolic process;cell differentiation;cellular aromatic compound metabolic process;cellular component assembly;cellular component organization;cellular lipid metabolic process;cellular metabolic process;cellular nitrogen compound metabolic process;cellular process;cellular respiration;developmental process;gen…	cell part;cytosol;endoplasmic reticulum;extracellular organelle;Golgi apparatus;intracellular membrane-bounded organelle;intracellular organelle;lysosome;membrane;microbody;organelle;peroxisome;plasma membrane;vacuole;vesicle	Amyotrophic lateral sclerosis (ALS);Methane metabolism;Peroxisome;Tryptophan metabolism	15.962	17.2489	16.7576	17.1063	16.1971	16.4338	17.1641	17.19	16.1773	16.8334	17.1259	16.6291	16.2835	16.538	16.9022	17.7957	16.0995	16.326	16.1127	16.8185	16.5577	16.4588	16.0988	16.0277	16.6991	16.5278	16.8252	17.1961	15.854	16.7541	16.9687	17.541
CAV1	Q03135	Caveolin-1	0.0470323	0.0262122	0.00123282		0.312803	-0.119753	-0.037459		0.720561	0.238286	0.171699		anatomical structure development;anatomical structure formation involved in morphogenesis;biological regulation;cell communication;cell differentiation;cell motility;cellular component assembly;cellular component movement;cellular component organization;cellular homeostasis;cellular ion homeostasis;cellular lipid metabolic process;cellular membrane organization;cellular metabolic process;cellular…	cell cortex;cell part;cell projection;cilium;endoplasmic reticulum;endosome;intracellular;intracellular membrane-bounded organelle;intracellular organelle;lipid particle;macromolecular complex;membrane;organelle;plasma membrane;protein complex;vesicle	Bacterial invasion of epithelial cells;Endocytosis;Focal adhesion;Viral myocarditis	16.0001	16.168	15.8998	15.8165	15.669	15.9049	15.9221	16.2302	16.1755	16.443	16.0709	16.6662	16.5589	16.5489	16.6371	15.9965	16.3611	16.6866	16.4825	16.1644	16.3433	16.3659	15.9545	16.4107	16.4767	16.5617	16.7475	16.4449	16.2099	16.2546	15.7283	15.6527
CAVIN1	Q6NZI2	Caveolae-associated protein 1	0.150725	-0.0378653	-0.00570726		0.00266311	-0.000964801	-2.56937e-06		0.350453	0.121799	0.0426849		biological regulation;biosynthetic process;cellular metabolic process;cellular nitrogen compound metabolic process;cellular process;macromolecule metabolic process;metabolic process;nitrogen compound metabolic process;nucleobase-containing compound metabolic process;primary metabolic process;RNA metabolic process;transcription from RNA polymerase I promoter;transcription initiation, DNA-dependent…	cell part;cytoplasm;cytosol;endoplasmic reticulum;intracellular membrane-bounded organelle;intracellular organelle;macromolecular complex;membrane;mitochondrion;nucleoplasm;nucleus;organelle;plasma membrane;protein complex		17.1002	17.0371	17.4868	17.1148	17.1591	17.1257	16.8738	17.0077	17.1225	17.4834	17.3043	17.8147	17.2792	17.3747	17.3768	17.1915	17.4839	17.3668	17.3293	16.9278	16.8425	17.0423	16.8409	17.0713	17.1683	17.2982	17.333	17.369	17.1147	17.2903	17.1651	17.0432
CAVIN2	O95810	Caveolae-associated protein 2	0.0942627	-0.0231903	-0.00218598		0.685178	0.129641	0.0888274		0.00721185	0.00255998	1.84622e-05			cell part;cytoplasm;cytosol		14.9702	15.1451	15.2388	15.0587	15.2441	15.0014	14.8653	14.9207	14.8291	15.3477	15.3325	15.3985	15.1615	15.2741	15.2589	15.21	15.1558	15.2923	15.3317	14.9454	14.8127	15.1057	14.7885	15.0121	15.0576	15.1394	15.0402	15.1508	15.0691	15.3382	15.0632	14.8855
CAVIN3	Q969G5	Caveolae-associated protein 3	0.0750715	-0.203286	-0.015261		0.46119	-0.803517	-0.370574		0.0618135	-0.120397	-0.00744217		biological regulation;cellular component organization;cellular process;cytoskeleton organization;organelle organization;rhythmic process	cell part;cytoplasm;macromolecular complex;protein complex		14.1318	NaN	14.1841	NaN	14.2349	NaN	NaN	NaN	14.3311	NaN	13.8955	15.1926	NaN	14.6011	14.2438	14.463	14.1721	14.9573	14.6415	13.7427	NaN	14.0757	13.8323	14.434	13.3271	13.3287	13.2372	NaN	13.9917	14.2685	13.9915	13.9959
CAVIN4	Q5BKX8	Caveolae-associated protein 4	0.0984845	-0.0619434	-0.00610046		0.225493	-0.120501	-0.0271722		0.812702	0.551923	0.448549		anatomical structure development;biological regulation;biosynthetic process;cell differentiation;cellular metabolic process;cellular nitrogen compound metabolic process;cellular process;developmental process;macromolecule metabolic process;metabolic process;nitrogen compound metabolic process;nucleobase-containing compound metabolic process;primary metabolic process;RNA metabolic process	cell part;cytoplasm		15.2821	14.8251	15.2159	15.0611	14.3838	15.7605	14.3723	14.3886	15.1924	15.1045	15.6013	15.6277	14.0389	14.3749	14.5581	14.5851	14.6245	14.7909	13.9315	14.2061	14.4734	14.7368	14.2177	14.5543	14.6281	14.3507	14.7523	14.6258	13.7855	14.4663	14.1916	13.9274
CBR1	P16152	Carbonyl reductase [NADPH] 1	0.27858	0.0607293	0.016918		0.321475	-0.0993528	-0.0319394		0.70635	0.207605	0.146642		cell differentiation;cellular ketone metabolic process;cellular lipid metabolic process;cellular metabolic process;cellular process;cofactor metabolic process;developmental process;drug metabolic process;lipid metabolic process;metabolic process;organic acid metabolic process;primary metabolic process;small molecule metabolic process;vitamin metabolic process	cell part;cytosol;extracellular organelle;organelle;vesicle	Arachidonic acid metabolism	15.29	15.5238	15.4422	15.5804	15.287	15.2738	15.5075	15.4859	15.4639	14.7533	15.4104	16.0894	15.2006	15.1918	15.1717	15.5232	15.0542	15.4354	15.6204	15.4368	15.5949	15.446	15.1206	15.4922	15.2014	15.3432	15.3965	15.3125	15.6186	15.3183	15.4115	15.6143
CC2D1A	Q6P1N0	Coiled-coil and C2 domain-containing protein 1A	0.0883403	-0.139833	-0.0123529		0.143083	0.207897	0.0297465		1.19302	-0.575557	-0.686652		biological regulation;biosynthetic process;cellular metabolic process;cellular nitrogen compound metabolic process;cellular process;macromolecule metabolic process;metabolic process;nitrogen compound metabolic process;nucleobase-containing compound metabolic process;primary metabolic process;response to stimulus;RNA metabolic process;signal transduction;transcription from RNA polymerase II promot…	cell part;cytoplasm;extracellular organelle;intracellular membrane-bounded organelle;intracellular organelle;membrane;microtubule organizing center;nucleus;organelle;vesicle		NaN	9.63214	10.3972	10.4044	10.853	11.0022	8.75829	NaN	NaN	10.7841	10.998	10.6607	NaN	NaN	NaN	10.5908	NaN	10.7151	11.4805	10.4738	9.46163	NaN	NaN	11.1753	11.4798	NaN	NaN	NaN	11.1408	9.59185	10.9517	10.7979
CCAR2	Q8N163	Cell cycle and apoptosis regulator protein 2	0.176925	0.209915	0.0371392		0.320006	-0.156871	-0.0501998		0.00296785	0.00552146	1.63869e-05		biological regulation;cell cycle;cellular component organization;cellular metabolic process;cellular nitrogen compound metabolic process;cellular process;macromolecule metabolic process;metabolic process;mitochondrion organization;mRNA metabolic process;mRNA processing;nitrogen compound metabolic process;nucleobase-containing compound metabolic process;organelle fission;organelle organization;pri…	cell part;cytoplasm;intracellular membrane-bounded organelle;intracellular organelle;nucleoplasm;nucleus;organelle		11.176	11.8877	12.044	11.9212	11.6248	11.9904	10.5883	9.56961	11.6796	11.384	11.4984	12.8205	9.56933	11.3111	11.0566	11.189	10.8354	8.80047	12.0879	10.7	11.7586	11.0513	11.0637	12.2786	10.7689	11.4472	12.0145	11.8063	NaN	10.7797	10.7593	11.2936
CCT2	P78371	T-complex protein 1 subunit beta	0.684704	0.239967	0.164306		0.399382	-0.159853	-0.0638424		0.611939	-0.306569	-0.187601		cell recognition;cellular component assembly;cellular component organization;cellular macromolecular complex assembly;cellular metabolic process;cellular process;macromolecular complex assembly;macromolecule metabolic process;metabolic process;primary metabolic process;protein complex assembly;protein folding;protein metabolic process	cell body;cell part;cytoplasm;cytosol;extracellular organelle;macromolecular complex;organelle;protein complex;vesicle		14.8157	14.878	14.458	14.9055	14.7703	13.6064	14.0317	14.668	14.4273	14.117	14.6333	15.0285	14.4764	14.7867	14.4656	14.7055	14.6113	14.6624	14.5618	14.7447	14.9031	14.1663	14.6961	13.5884	13.9949	14.0577	14.5748	13.966	14.5373	14.6101	14.3114	14.4967
CCT3	P49368	T-complex protein 1 subunit gamma	0.450409	0.0697467	0.0314145		0.0859491	-0.0193559	-0.00166363		0.00807825	-0.00407187	-3.28936e-05		cell recognition;cellular component assembly;cellular component organization;cellular metabolic process;cellular process;macromolecule metabolic process;metabolic process;primary metabolic process;protein folding;protein metabolic process	cell body;cell part;cytoplasm;cytoskeleton;cytosol;extracellular organelle;intracellular non-membrane-bounded organelle;intracellular organelle;macromolecular complex;membrane;organelle;plasma membrane;protein complex;vesicle		16.2593	16.3956	16.1517	16.157	16.0317	16.1167	16.2176	16.2838	16.1742	16.0609	16.3583	16.7857	16.0314	16.0013	15.9082	16.2872	15.8737	15.8014	16.0325	16.2331	16.0999	16.1161	15.9498	15.8909	16.1896	16.1082	16.3739	16.0606	16.0782	15.9245	16.0243	16.1513
CCT4	P50991	T-complex protein 1 subunit delta	0.614229	0.182161	0.111889		1.35642	0.320204	0.434332		0.0240521	-0.0178057	-0.000428265		cell recognition;cellular metabolic process;cellular process;macromolecule metabolic process;metabolic process;primary metabolic process;protein folding;protein metabolic process	cell body;cell part;centrosome;cytoplasm;cytoplasmic membrane-bounded vesicle;cytosol;extracellular organelle;intracellular membrane-bounded organelle;intracellular non-membrane-bounded organelle;intracellular organelle;macromolecular complex;microtubule organizing center;nucleoplasm;organelle;protein complex;vesicle		13.7221	13.7189	13.1339	13.8791	13.7604	13.3704	13.818	13.9629	13.7945	13.8864	14.2075	14.3561	13.8687	13.9585	13.472	13.6049	13.1898	13.7698	13.4297	13.8725	13.5348	13.7609	13.267	13.0532	13.1243	13.3595	12.953	13.6425	13.4288	13.0327	13.6333	13.8168
CCT5	P48643	T-complex protein 1 subunit epsilon	0.82474	0.33518	0.276436		0.0323043	0.0229487	0.000741342		0.20405	-0.0933167	-0.0190413		cell recognition;cellular metabolic process;cellular process;macromolecule metabolic process;metabolic process;multi-organism process;primary metabolic process;protein folding;protein metabolic process;response to biotic stimulus;response to stimulus	cell body;cell part;centrosome;cytoplasm;cytosol;extracellular organelle;intracellular non-membrane-bounded organelle;intracellular organelle;macromolecular complex;microtubule organizing center;nucleolus;organelle;protein complex;vesicle		15.0511	14.5597	14.5382	15.0393	14.3802	14.2316	14.0195	14.7456	15.4664	14.687	14.5836	14.9085	14.5758	14.3796	13.9916	14.9261	14.1901	13.9243	13.812	14.5177	14.9415	14.4179	14.7626	14.0341	14.086	14.5569	14.241	14.4367	13.914	14.3083	13.6985	14.4944
CCT6A	P40227	T-complex protein 1 subunit zeta	0.236569	0.116358	0.0275268		0.165815	-0.0669238	-0.011097		0.488072	-0.169687	-0.0828195		cell recognition;cellular metabolic process;cellular process;macromolecule metabolic process;metabolic process;primary metabolic process;protein folding;protein metabolic process	cell body;cell part;cytoplasm;cytoplasmic membrane-bounded vesicle;cytosol;extracellular organelle;intracellular membrane-bounded organelle;intracellular organelle;macromolecular complex;organelle;protein complex;vesicle		14.6697	14.5665	14.0402	14.8152	14.7259	14.3022	14.3413	14.676	14.4783	14.4912	14.7979	14.4854	14.419	14.4589	14.3794	14.0274	14.5127	14.4503	14.5827	14.6577	14.819	14.4146	14.6048	14.4304	14.8947	14.7282	14.4426	14.0615	14.682	14.3233	13.6015	14.1197
CCT8	P50990	T-complex protein 1 subunit theta	0.0758923	0.0347989	0.00264097		0.419979	-0.110355	-0.0463469		0.0396129	-0.0183023	-0.000725006		cell recognition;cellular component assembly;cellular component organization;cellular metabolic process;cellular process;macromolecule metabolic process;metabolic process;primary metabolic process;protein folding;protein metabolic process	cell body;cell part;centrosome;cytoplasm;cytoskeleton;cytosol;extracellular organelle;intracellular non-membrane-bounded organelle;intracellular organelle;macromolecular complex;microtubule organizing center;organelle;protein complex;vesicle		17.4749	17.7363	17.4042	17.3363	17.3669	17.3153	17.7472	17.8994	17.6055	17.6177	17.6996	18.1507	17.2012	17.1394	17.5057	17.405	17.2954	17.3378	17.3175	17.6015	17.8434	17.2127	17.6141	17.2263	17.4701	16.9341	17.5661	17.5353	17.5566	17.3145	17.3637	17.4727
CD36	P16671	Platelet glycoprotein 4	0.473398	0.121812	0.0576655		0.423582	0.135111	0.0572304		0.49251	0.151039	0.0743882		biological adhesion;biological regulation;cell activation;cell adhesion;cell recognition;cellular component organization;cellular lipid metabolic process;cellular membrane organization;cellular metabolic process;cellular process;coagulation;endocytosis;establishment of localization;exocytosis;immune system process;lipid metabolic process;lipid transport;localization;membrane invagination;membrane…	cell part;cell surface;cytoplasmic membrane-bounded vesicle;extracellular space;Golgi apparatus;intracellular membrane-bounded organelle;intracellular organelle;membrane;organelle;plasma membrane;vesicle	Adipocytokine signaling pathway;ECM-receptor interaction;Fat digestion and absorption;Hematopoietic cell lineage;Malaria;Phagosome;PPAR signaling pathway	15.7837	15.6305	15.633	15.6893	15.4989	15.4624	15.7067	15.7991	15.855	15.7543	15.7957	16.1276	15.9708	16.0375	15.7398	15.8972	15.9111	15.5939	15.7187	16.0214	15.9194	15.9607	15.597	15.7696	15.3008	15.6006	15.0061	15.7604	15.207	15.5788	15.8154	15.9379
CD44	P16070	CD44 antigen	0.222156	0.416966	0.0926315		1.07463	-0.893063	-0.959717		0.665084	0.499122	0.331958		amine metabolic process;anatomical structure development;anatomical structure morphogenesis;biological adhesion;biological regulation;carbohydrate metabolic process;catabolic process;cell adhesion;cell motility;cellular component disassembly;cellular component movement;cellular component organization;cellular process;coagulation;developmental process;extracellular matrix organization;extracellula…	cell part;cell surface;cytoplasm;extracellular organelle;Golgi apparatus;intracellular membrane-bounded organelle;intracellular organelle;macromolecular complex;membrane;organelle;plasma membrane;protein complex;receptor complex;vesicle	ECM-receptor interaction;Hematopoietic cell lineage;Shigellosis	NaN	12.9044	13.6366	12.9042	12.9243	12.0637	12.3287	NaN	12.6413	12.7662	11.6076	13.3339	NaN	12.9945	13.3162	NaN	12.9002	13.202	12.7605	13.0472	11.9635	NaN	NaN	12.1887	12.4282	NaN	13.2999	12.7502	NaN	12.3259	NaN	12.3472
CD99	P14209	CD99 antigen	0.573674	0.504348	0.289331		0.72798	0.490913	0.357375		0.0672144	0.102921	0.00691781		biological adhesion;cell adhesion;cellular process	cell part;cytoplasm;membrane;plasma membrane	Cell adhesion molecules (CAMs);Leukocyte transendothelial migration	11.9984	11.7369	12.3369	NaN	11.7762	11.8334	12.2582	10.9336	12.2573	12.9685	12.6404	13.0765	NaN	NaN	11.4052	12.6138	11.7593	12.3202	10.7802	11.4606	11.602	NaN	11.6852	12.8563	10.2295	NaN	10.556	11.8162	12.5897	NaN	11.5055	12.037
CDC37	Q16543	Hsp90 co-chaperone Cdc37	0.624784	-0.577421	-0.360763		0.431159	0.621272	0.267867		0.137466	-0.286766	-0.0394207		biological regulation;cellular metabolic process;cellular process;establishment of localization;macromolecule metabolic process;metabolic process;primary metabolic process;protein folding;protein metabolic process;protein targeting;protein transport;regulation of cell cycle;regulation of protein modification process;regulation of protein stability;transport	cell part;cytoplasm;cytosol;extracellular organelle;macromolecular complex;organelle;protein complex;vesicle		13.2732	13.1946	NaN	13.4788	NaN	NaN	13.9168	14.2357	13.7949	13.7535	14.2938	14.2288	13.1494	13.577	13.2436	14.3262	13.5037	13.5988	14.004	12.8394	14.2413	13.8205	13.4662	13.8169	13.9649	13.9981	13.6028	13.7657	13.5179	NaN	14.4164	NaN
CDC42	P60953	Cell division control protein 42 homolog	3.65172	0.357416	1.30518	+	0.493353	0.155462	0.0766978		0.0655625	0.0243667	0.00159754		anatomical structure development;anatomical structure formation involved in morphogenesis;anatomical structure morphogenesis;biological adhesion;biological regulation;cell adhesion;cell communication;cell development;cell differentiation;cell junction organization;cell-cell signaling;cellular component assembly;cellular component movement;cellular component organization;cellular localization;cell…	apical part of cell;cell body;cell part;cell projection;cytoplasm;cytoplasmic membrane-bounded vesicle;cytosol;extracellular organelle;filopodium;intracellular membrane-bounded organelle;intracellular non-membrane-bounded organelle;intracellular organelle;membrane;microtubule organizing center;midbody;neuron projection;neuronal cell body;organelle;plasma membrane;vesicle	Adherens junction;Axon guidance;Bacterial invasion of epithelial cells;Chemokine signaling pathway;Endocytosis;Epithelial cell signaling in Helicobacter pylori infection;Fc gamma R-mediated phagocytosis;Focal adhesion;GnRH signaling pathway;Leukocyte transendothelial migration;MAPK signaling pathway;MAPK signaling pathway - yeast;Neurotrophin signaling pathway;Pancreatic cancer;Pathogenic Escheri…	14.3015	14.5352	14.5712	14.5466	14.2786	14.4652	14.2773	14.7363	14.7954	14.6202	14.5248	14.9239	14.2984	14.4767	14.2143	14.527	14.5755	14.0406	14.0776	14.5431	14.676	14.3498	14.2868	14.3559	14.2511	14.5623	13.8912	14.5499	14.2323	14.2963	14.0096	14.5064
CDH13	P55290	Cadherin-13	0.0371747	-0.0120966	-0.000449686		0.163124	-0.0385365	-0.00628625		0.568552	0.151176	0.0859514		anatomical structure formation involved in morphogenesis;biological adhesion;biological regulation;cell adhesion;cell junction organization;cell motility;cell proliferation;cellular component assembly;cellular component movement;cellular component organization;cellular localization;cellular process;developmental process;localization;locomotion;regulation of transport;response to stimulus;signal t…	cell part;cell projection;cytoplasm;extracellular organelle;extracellular space;membrane;neuron projection;organelle;plasma membrane;vesicle		15.9972	15.9743	16.2116	16.1073	16.081	16.0366	15.8293	15.9033	16.0379	16.05	16.099	16.5231	16.2898	16.3493	16.3147	16.3467	16.2164	16.0417	16.1719	16.2804	16.1505	16.1593	15.9426	16.3386	16.0571	16.089	16.1907	16.1122	16.3724	16.2052	16.0575	15.7339
CDK5RAP3	Q96JB5	CDK5 regulatory subunit-associated protein 3	2.2129	1.41318	3.12722	+	0.00904144	0.0135452	0.000122468		0.397384	-0.618542	-0.245798		anatomical structure development;biological regulation;cell proliferation;cellular metabolic process;cellular process;developmental process;macromolecule metabolic process;macromolecule modification;metabolic process;primary metabolic process;protein metabolic process;protein modification by small protein conjugation or removal;protein modification process;regulation of cell cycle;regulation of m…	cell part;centrosome;cytoplasm;endomembrane system;intracellular membrane-bounded organelle;intracellular non-membrane-bounded organelle;intracellular organelle;macromolecular complex;membrane;microtubule organizing center;nucleus;organelle;protein complex		NaN	13.1086	NaN	NaN	NaN	NaN	NaN	12.8077	NaN	NaN	13.389	13.1299	12.2348	12.9647	12.2146	NaN	NaN	NaN	11.9071	12.7204	NaN	NaN	12.3086	12.6404	NaN	12.5427	NaN	11.8799	NaN	NaN	11.3025	NaN
CEFIP	Q711Q0	Cardiac-enriched FHL2-interacting protein	0.853127	0.0880264	0.0750977		0.0801455	0.0240575	0.0019281		0.519817	0.145895	0.0758386					15.0425	15.2399	15.4583	15.2424	14.9785	15.3799	15.049	15.1879	15.1086	14.953	15.1018	15.4794	15.1159	15.24	15.0602	14.8823	14.8899	15.0019	15.1333	15.3371	14.823	15.2656	15.3258	15.0838	15.3332	15.2247	14.9029	15.1707	14.7476	14.929	15.2982	15.2708
CENPV	Q7Z7K6	Centromere protein V	0.885784	-0.196702	-0.174235		0.0646645	-0.0222027	-0.00143572		0.361411	-0.0596735	-0.0215666		biological regulation;cell division;cell motility;cellular component assembly;cellular component movement;cellular component organization;cellular macromolecular complex assembly;cellular process;chromatin modification;chromatin organization;chromosome organization;locomotion;macromolecular complex assembly;mitosis;nuclear division;organelle fission;organelle organization;regulation of organelle …	cell part;cytoplasm;cytoskeleton;intracellular membrane-bounded organelle;intracellular non-membrane-bounded organelle;intracellular organelle;kinetochore;macromolecular complex;nucleoplasm;nucleus;organelle;protein complex		16.0522	15.8926	15.3407	15.8656	15.8356	15.8132	15.9924	15.8505	15.7619	15.7616	15.9084	15.8903	15.7916	15.9092	16.0392	15.615	16.11	15.8692	16.1883	15.9158	15.9973	15.9757	15.9952	15.7934	15.6227	15.5	16.0365	15.8631	15.7808	15.8635	16.1236	15.5226
CES1	P23141	Liver carboxylesterase 1	0.0540395	-0.0263405	-0.00142343		0.146546	0.0929594	0.0136228		0.44304	-0.12388	-0.0548838		cell differentiation;cellular process;developmental process;metabolic process;response to chemical stimulus;response to stimulus	cell part;extracellular space	Drug metabolism - other enzymes;Tropane, piperidine and pyridine alkaloid biosynthesis	17.4926	17.508	16.7324	17.2446	17.4466	17.488	17.1557	17.1558	17.1584	17.442	17.5456	17.28	17.848	17.8966	17.947	17.2601	17.737	17.102	17.5982	17.9102	18.0396	18.0499	17.1588	17.7967	17.8022	17.2753	17.2321	17.2305	17.5237	17.1547	17.2979	17.2909
CES2	O00748	Cocaine esterase	0.163832	0.298349	0.0488793		0.109424	-0.191018	-0.0209019		0.025884	-0.0607789	-0.0015732		catabolic process;metabolic process	cell part;endoplasmic reticulum;extracellular space;intracellular membrane-bounded organelle;intracellular organelle;organelle	Drug metabolism - other enzymes	14.8463	14.8378	NaN	14.8742	13.6899	NaN	13.4152	NaN	14.362	13.9513	15.0022	14.3856	13.4315	12.8604	13.6672	13.2028	NaN	NaN	NaN	13.3202	13.6621	NaN	NaN	NaN	12.8445	13.3106	14.0101	12.6381	NaN	13.3529	12.8773	13.7814
CFB	P00751	Complement factor B	0.39643	0.242186	0.0960097		0.577048	-0.604034	-0.348557		0.509348	-0.380443	-0.193778		biological regulation;immune system process;macromolecule metabolic process;metabolic process;primary metabolic process;protein metabolic process;response to stimulus;response to stress	cell part;extracellular organelle;extracellular region;extracellular space;membrane;organelle;plasma membrane;vesicle	Complement and coagulation cascades;Staphylococcus aureus infection	13.2336	14.5142	14.0632	13.8466	13.2129	12.8878	13.8091	13.1925	13.2585	13.6749	13.9819	14.137	13.6108	13.5444	14.1459	13.1981	13.3483	12.6591	13.3146	13.0042	12.587	NaN	12.6854	12.4026	13.2096	13.533	13.1739	13.0872	12.8448	NaN	13.5907	14.4333
CFH	P08603	Complement factor H	0.423199	0.239366	0.101299		0.258412	0.127752	0.0330127		0.138001	0.116092	0.0160208		biological regulation;immune system process;macromolecule metabolic process;metabolic process;primary metabolic process;protein metabolic process;response to stimulus;response to stress	extracellular organelle;extracellular region;extracellular space;organelle;vesicle	Complement and coagulation cascades;Staphylococcus aureus infection	14.1414	15.0809	14.9242	14.6413	14.2997	13.7294	15.01	14.3244	14.5068	14.8784	15.0451	15.2114	14.46	14.6595	14.8358	14.9257	13.8633	13.9818	13.8572	14.3144	13.9271	14.5112	14.3911	13.8844	14.2654	14.4212	13.9875	14.1796	13.5693	14.5806	14.9814	15.3511
CFL1	P23528	Cofilin-1	0.160535	-0.0463374	-0.00743878		0.402806	-0.0852709	-0.0343476		0.17631	-0.184218	-0.0324795		anatomical structure morphogenesis;biological regulation;cell activation;cell motility;cellular component disassembly;cellular component movement;cellular component organization;cellular metabolic process;cellular process;coagulation;cytokinesis;cytoskeleton organization;developmental process;establishment of localization;establishment or maintenance of cell polarity;exocytosis;immune system proc…	cell part;cytoplasm;cytoskeleton;extracellular organelle;extracellular space;intracellular membrane-bounded organelle;intracellular non-membrane-bounded organelle;intracellular organelle;membrane;nucleus;organelle;vesicle	Axon guidance;Fc gamma R-mediated phagocytosis;Regulation of actin cytoskeleton	17.2296	17.2898	17.2478	17.255	17.5394	17.335	17.7475	17.4185	17.3848	17.3111	17.099	17.2087	17.0991	17.3897	17.2877	16.9361	16.9476	17.5051	17.6617	17.3112	17.3838	17.5537	17.08	17.5292	17.3892	17.5888	17.2472	17.2887	17.3406	15.0624	17.5863	17.4373
CFL2	Q9Y281	Cofilin-2	0.713839	0.139018	0.0992363		0.532327	0.216323	0.115154		0.167592	-0.0784632	-0.0131498		biological regulation;cellular component disassembly;cellular component organization;cellular homeostasis;cellular process;cytoskeleton organization;homeostatic process;organelle organization;protein depolymerization;regulation of organelle organization	cell part;cytoskeleton;extracellular organelle;extracellular space;intracellular non-membrane-bounded organelle;intracellular organelle;organelle;vesicle	Axon guidance;Fc gamma R-mediated phagocytosis;Regulation of actin cytoskeleton	16.7591	16.8328	16.4016	16.6011	16.5685	16.1515	16.7734	16.7518	16.7547	16.7238	16.7261	16.4515	16.9997	17.1041	16.9182	17.4392	17.2077	17.1284	16.5705	16.8607	16.4695	16.7957	16.3108	16.7387	16.442	16.6548	16.0166	16.4475	16.5004	16.4198	16.6431	16.8177
CHCHD3	Q9NX63	MICOS complex subunit MIC19	0.0898815	-0.0531276	-0.00477519		0.372205	0.10644	0.0396175		0.0753051	-0.0340802	-0.00256641		biological regulation;cellular component organization;cellular membrane organization;cellular process;membrane fusion;membrane organization;mitochondrion organization;organelle fusion;organelle organization	cell part;cytoplasm;extracellular organelle;intracellular membrane-bounded organelle;intracellular organelle;membrane;mitochondrion;nucleus;organelle;vesicle		17.1844	17.3556	17.6695	17.2822	17.1862	17.9087	17.3115	17.6536	17.8194	17.7965	17.838	17.5658	17.7596	17.7591	17.5094	17.7809	18.0206	17.3575	17.5483	17.6997	17.4254	17.6834	17.4174	17.4291	18.5247	17.2788	17.1165	17.4788	17.3272	17.1958	17.6817	17.9446
CHMP4B	Q9H444	Charged multivesicular body protein 4b	0.433762	0.8643	0.374901		0.250193	-0.370501	-0.0926967		0.0151976	0.0311441	0.000473318		biological regulation;cellular component assembly;cellular component organization;cellular process;endosome transport;establishment of localization;macromolecular complex assembly;membrane organization;nucleus organization;organelle organization;protein complex assembly;protein targeting;protein transport;regulation of cell cycle;regulation of organelle organization;transport;vacuolar transport;v…	cell part;cytoplasm;cytosol;endosome;extracellular organelle;intracellular membrane-bounded organelle;intracellular organelle;macromolecular complex;membrane;midbody;nucleus;organelle;protein complex;vesicle	Endocytosis	13.6083	13.8008	13.015	13.0037	13.3728	12.8825	11.1087	13.881	12.8724	13.5967	12.3219	13.9331	14.1716	13.935	13.3673	13.5831	13.8001	14.3862	NaN	13.2145	13.9592	NaN	13.4347	NaN	NaN	NaN	12.0812	13.9377	12.4731	NaN	NaN	12.945
CILP	O75339	Cartilage intermediate layer protein 1	0.0734885	0.108605	0.00798119		0.780908	-0.858216	-0.670188		0.536585	-0.80558	-0.432262		biological regulation	extracellular matrix;extracellular organelle;extracellular space;organelle;proteinaceous extracellular matrix;vesicle		NaN	12.3285	12.5576	12.4976	12.446	NaN	12.3823	NaN	13.3194	12.2311	12.125	13.6203	12.3189	12.2845	12.3696	NaN	13.3056	10.6083	12.7016	10.6107	12.1829	NaN	14.2638	10.7788	NaN	12.2546	12.3194	12.454	11.8913	12.8727	11.5903	12.0798
CIRBP	Q14011	Cold-inducible RNA-binding protein	1.48771	-0.513042	-0.763257		0.297925	-0.148921	-0.0443673		0.467328	0.205403	0.0959905		biological regulation;cellular component assembly;cellular component organization;cellular macromolecular complex assembly;cellular metabolic process;cellular nitrogen compound metabolic process;cellular process;macromolecular complex assembly;macromolecule metabolic process;metabolic process;mRNA metabolic process;nitrogen compound metabolic process;nucleobase-containing compound metabolic proce…	cell part;cytoplasm;intracellular membrane-bounded organelle;intracellular non-membrane-bounded organelle;intracellular organelle;macromolecular complex;nucleoplasm;nucleus;organelle;ribonucleoprotein complex		15.1111	13.6127	14.9116	14.9534	15.0549	14.45	14.5973	14.6155	14.042	14.0114	13.8643	15.1888	14.9429	14.1481	14.5983	14.2661	14.8031	14.9152	14.8301	14.5626	14.8968	14.9035	14.8527	14.8542	15.1895	14.895	14.9568	14.2489	14.4619	14.8206	14.8883	14.6471
CISD1	Q9NZ45	CDGSH iron-sulfur domain-containing protein 1	0.230901	0.300247	0.0693272		0.262113	0.216799	0.0568259		0.235546	0.305945	0.0720641		biological regulation	cell part;extracellular organelle;intracellular membrane-bounded organelle;intracellular organelle;membrane;mitochondrion;organelle;vesicle		NaN	13.4588	13.6884	NaN	NaN	13.7316	13.623	NaN	14.0968	13.8163	13.8697	13.3307	14.1426	14.4416	13.1872	14.9845	14.4187	14.4283	13.7553	13.9791	13.7737	13.8338	13.1502	13.7336	13.1377	13.8759	13.0881	13.5363	13.8777	12.9643	13.6801	14.2826
CKB	P12277	Creatine kinase B-type	0.0516907	-0.0680787	-0.00351903		0.173512	0.177957	0.0308776		0.0789976	0.0716658	0.00566142		amine metabolic process;anatomical structure development;biological regulation;cellular amino acid metabolic process;cellular homeostasis;cellular ion homeostasis;cellular ketone metabolic process;cellular metabolic process;cellular nitrogen compound metabolic process;cellular process;developmental process;homeostatic process;metabolic process;nitrogen compound metabolic process;organic acid meta…	cell part;cytosol;extracellular organelle;intracellular membrane-bounded organelle;intracellular organelle;mitochondrion;organelle;vesicle	Arginine and proline metabolism	18.7363	18.2325	18.3293	18.5242	18.7573	18.7784	18.4829	18.3496	18.2222	18.6412	18.413	18.1757	20.5336	20.4354	20.0532	20.0683	19.9152	19.2533	18.8	19.2262	19.0172	19.261	17.9777	18.7393	18.8765	19.249	18.5995	19.0436	18.7972	18.7315	18.6828	18.2109
CKM	P06732	Creatine kinase M-type	0.0708586	-0.00962639	-0.000682113		0.103714	0.0185121	0.00191997		0.532034	-0.0972719	-0.051752		amine metabolic process;biosynthetic process;cellular amino acid metabolic process;cellular ketone metabolic process;cellular metabolic process;cellular nitrogen compound metabolic process;cellular process;metabolic process;nitrogen compound metabolic process;organic acid metabolic process;primary metabolic process;small molecule metabolic process	cell part;cytosol	Arginine and proline metabolism	24.9905	24.9361	25.0567	24.9451	25.0153	25.1018	25.0345	25.0625	24.8605	24.8948	24.9538	24.6094	25.138	24.9843	24.9623	25.0937	25.1154	25.0712	24.9164	24.9096	25.0163	24.9406	24.9279	25.0637	24.8879	24.9068	24.8878	25.0824	25.0043	24.7446	24.8525	24.9626
CKMT2	P17540	Creatine kinase S-type, mitochondrial	0.00356675	0.00250753	8.94372e-06		0.394516	0.166097	0.0655278		1.04219	-0.419389	-0.437084		amine metabolic process;cellular amino acid metabolic process;cellular ketone metabolic process;cellular metabolic process;cellular nitrogen compound metabolic process;cellular process;metabolic process;multicellular organismal process;muscle contraction;nitrogen compound metabolic process;organic acid metabolic process;primary metabolic process;small molecule metabolic process	cell part;intracellular membrane-bounded organelle;intracellular organelle;membrane;mitochondrion;organelle	Arginine and proline metabolism	20.2336	20.1642	20.2347	20.347	20.4945	20.5456	20.4322	20.5134	20.6399	20.8572	20.573	19.6274	21.4208	21.3144	21.2357	21.2284	21.3899	20.7952	20.7686	20.773	20.9407	20.874	20.6932	20.5809	20.8084	20.9854	20.3517	20.904	20.8458	20.0793	21.035	20.9633
CLASP1	Q7Z460	CLIP-associating protein 1	0.0397836	-0.0792079	-0.00315117		1.44364	1.16165	1.677	+	0.168379	0.125179	0.0210775		biological regulation;cell cycle;cell division;cellular component organization;cellular process;cytoskeleton organization;establishment of localization;establishment or maintenance of cell polarity;locomotion;microtubule organizing center organization;mitotic cell cycle;organelle organization;regulation of organelle organization;response to chemical stimulus;response to external stimulus;response…	cell cortex;cell part;centrosome;cytoskeleton;cytosol;extracellular organelle;Golgi apparatus;intracellular membrane-bounded organelle;intracellular non-membrane-bounded organelle;intracellular organelle;kinetochore;macromolecular complex;membrane;microtubule organizing center;organelle;protein complex;vesicle		8.45736	10.015	NaN	10.4736	9.38846	10.4499	9.1259	9.34023	10.2384	10.2553	10.1763	10.5179	9.9459	NaN	8.92548	10.2332	10.1137	10.3152	11.0417	9.62266	9.73773	NaN	NaN	10.2344	NaN	10.339	10.2212	NaN	10.2415	NaN	NaN	NaN
CLIC5	Q9NZA1	Chloride intracellular channel protein 5	0.212102	-0.12711	-0.0269603		0.0321781	-0.0360993	-0.0011616		0.206346	0.137269	0.028325		biological regulation;cellular component organization;cellular process;establishment of localization;ion transport;localization;multicellular organismal process;multi-organism process;neurological system process;transport	cell cortex;cell part;cell projection;cytoskeleton;extracellular organelle;Golgi apparatus;intracellular membrane-bounded organelle;intracellular non-membrane-bounded organelle;intracellular organelle;macromolecular complex;microtubule organizing center;microvillus;organelle;protein complex;vesicle		12.6982	13.4008	13.409	13.2353	12.7037	13.3632	13.0515	12.6952	12.9388	12.6499	13.079	13.221	13.0553	13.1083	13.8619	13.6368	13.8949	13.8957	13.7704	12.5576	13.2541	12.9756	13.1216	13.7645	13.1272	12.4346	NaN	NaN	13.3938	12.4381	12.8238	13.5675
CLINT1	Q14677	Clathrin interactor 1	1.66852	0.515304	0.859796		0.418524	0.157929	0.0660969		0.185316	0.109784	0.0203447		cellular component assembly;cellular component organization;cellular macromolecular complex assembly;cellular membrane organization;cellular process;endocytosis;establishment of localization;Golgi vesicle transport;macromolecular complex assembly;membrane invagination;membrane organization;organelle organization;protein complex assembly;transport;vesicle organization;vesicle-mediated transport	cell part;cytoplasmic membrane-bounded vesicle;cytosol;Golgi apparatus;intracellular membrane-bounded organelle;intracellular organelle;membrane;nucleoplasm;organelle;vesicle		14.8276	15.8587	15.7187	15.6836	14.9701	15.8412	15.205	15.7262	15.4977	15.9853	15.6382	15.7116	15.4678	15.1671	15.4187	15.363	15.5622	14.6685	15.6379	16.0722	15.6465	15.3025	15.8558	15.8749	15.0072	16.1453	15.1172	15.4019	15.6966	15.6916	15.3799	15.6479
CLIP1	P30622	CAP-Gly domain-containing linker protein 1	0.118006	0.198288	0.0233992		0.00153444	-0.00210381	-3.22816e-06		0.0371208	0.0530222	0.00196823		biological regulation;cell cycle;cellular component organization;cellular process;cytoskeleton organization;mitosis;mitotic cell cycle;nuclear division;organelle fission;organelle organization;regulation of organelle organization;response to stimulus;signal transduction	cell part;cell projection;centrosome;cytoplasm;cytoskeleton;cytosol;endosome;intracellular membrane-bounded organelle;intracellular non-membrane-bounded organelle;intracellular organelle;kinetochore;macromolecular complex;membrane;microtubule organizing center;organelle;protein complex		NaN	NaN	NaN	13.3568	13.5858	12.3646	13.0495	13.1827	12.2807	11.8666	12.9206	12.8874	NaN	11.6793	13.0908	13.0156	11.5788	13.2831	12.985	11.749	13.0761	12.7374	12.6209	13.2006	NaN	13.1142	12.3617	11.016	11.6911	NaN	12.7263	12.3851
CLTC	Q00610	Clathrin heavy chain 1	0.293655	-0.0651189	-0.0191225		1.19513	-0.170376	-0.203621		0.0462938	-0.0188093	-0.000870756					14.5637	14.8104	14.8372	14.6517	14.9049	14.7335	14.8685	14.9635	14.8672	14.6853	14.9579	15.195	14.6207	14.4798	14.5017	14.658	14.5656	14.6618	14.8479	14.6525	14.9215	14.4723	14.5574	14.8248	14.9778	14.5878	14.9375	14.8277	14.6684	14.3044	14.742	14.7359
CLU	P10909	Clusterin	1.03496	0.360566	0.373172		0.011537	-0.00766627	-8.84459e-05		0.972398	0.272522	0.265		anatomical structure morphogenesis;biological regulation;cell activation;cell morphogenesis;cellular component assembly;cellular component morphogenesis;cellular component organization;cellular macromolecular complex assembly;cellular membrane organization;cellular metabolic process;cellular process;coagulation;developmental process;establishment of localization;exocytosis;immune system process;l…	cell part;cytoplasm;cytoplasmic membrane-bounded vesicle;cytosol;endoplasmic reticulum;extracellular matrix;extracellular organelle;extracellular region;extracellular space;Golgi apparatus;intracellular membrane-bounded organelle;intracellular organelle;macromolecular complex;membrane;mitochondrion;nucleus;organelle;vesicle		15.8293	16.8139	16.5492	16.2391	15.9128	16.3442	16.4901	16.1649	16.3716	16.8514	16.4141	16.7988	15.8938	15.8821	16.3993	16.4245	15.9692	16.2495	15.9027	16.1716	15.5066	15.6024	15.9452	15.9073	15.4754	16.1189	16.4477	16.145	15.8935	16.0021	15.9866	16.5898
CMAS	Q8NFW8	N-acylneuraminate cytidylyltransferase	1.02451	-0.246304	-0.252342		0.805171	-0.216606	-0.174405		0.200433	-0.0878696	-0.017612		alcohol metabolic process;biosynthetic process;carbohydrate metabolic process;cellular ketone metabolic process;cellular metabolic process;cellular process;macromolecule metabolic process;macromolecule modification;metabolic process;oligosaccharide metabolic process;organic acid metabolic process;peptidyl-amino acid modification;primary metabolic process;protein glycosylation;protein metabolic pr…	cell part;intracellular membrane-bounded organelle;intracellular organelle;membrane;nucleoplasm;nucleus;organelle	Amino sugar and nucleotide sugar metabolism	14.0915	13.4082	14.2377	14.1133	13.5424	13.5437	13.8328	13.7914	13.8743	13.4077	14.06	14.3253	13.98	13.636	13.7729	13.9304	14.0297	13.5453	14.2647	13.5142	14.1832	13.771	14.1226	14.1574	13.5682	13.8254	13.8999	13.4146	13.716	14.0018	13.9418	14.026
CMBL	Q96DG6	Carboxymethylenebutenolidase homolog	0.383069	0.239984	0.0919304		1.34275	0.463712	0.622648		0.314954	0.136418	0.0429655			cell part;cytosol;extracellular organelle;organelle;vesicle	Chlorocyclohexane and chlorobenzene degradation;Fluorobenzoate degradation;Toluene degradation	16.9546	16.9952	16.4262	16.927	16.8213	17.0552	16.8976	17.438	16.7447	16.8739	16.5957	16.3938	15.7791	16.2171	16.104	16.5221	16.3752	16.0107	16.2133	16.0259	16.1962	16.269	16.437	16.5764	16.4465	16.6726	15.4589	16.7797	16.3606	16.7319	16.1412	16.5232
CMPK1	P30085	UMP-CMP kinase	0.810288	0.192852	0.156265		0.401117	0.074077	0.0297135		1.1877	0.204285	0.24263		biosynthetic process;cellular aromatic compound metabolic process;cellular ketone metabolic process;cellular metabolic process;cellular nitrogen compound metabolic process;cellular process;heterocycle metabolic process;metabolic process;nitrogen compound metabolic process;nucleobase-containing compound metabolic process;nucleobase-containing small molecule interconversion;nucleobase-containing sm…	cell part;cytoplasm;cytosol;extracellular organelle;intracellular membrane-bounded organelle;intracellular non-membrane-bounded organelle;intracellular organelle;nucleolus;nucleoplasm;nucleus;organelle;vesicle	Pyrimidine metabolism	15.1232	15.4261	15.1084	15.156	14.9458	15.4312	15.3371	15.5081	15.3478	15.2282	15.2895	15.6523	15.2116	15.366	15.2143	15.6194	15.5673	15.3558	15.3478	15.2135	15.3425	15.2795	15.2968	15.6167	14.9503	15.3962	15.3079	15.4375	15.2434	15.3501	14.7446	14.9618
CMYA5	Q8N3K9	Cardiomyopathy-associated protein 5	0.837084	-0.159719	-0.133698		0.537215	-0.0887171	-0.0476602		0.463289	-0.108737	-0.0503765		biological regulation	cell part		16.7591	16.7054	16.9746	16.8569	16.8785	16.8108	16.7851	16.7225	16.744	16.6611	16.7658	16.4168	16.6529	16.6818	16.8672	16.7514	16.8101	16.9025	17.0305	16.7242	16.801	16.7965	16.9502	16.8439	17.1209	16.693	16.5932	16.6317	16.7098	16.6221	17.1559	17.0193
CNBP	P62633	CCHC-type zinc finger nucleic acid binding protein	0.383941	-0.319895	-0.122821		0.19992	0.165992	0.0331851		0.00158593	0.00200081	3.17315e-06		alcohol metabolic process;biological regulation;biosynthetic process;cellular metabolic process;cellular nitrogen compound metabolic process;cellular process;lipid metabolic process;macromolecule metabolic process;metabolic process;nitrogen compound metabolic process;nucleobase-containing compound metabolic process;primary metabolic process;RNA metabolic process;small molecule metabolic process	cell part;cytosol;endoplasmic reticulum;intracellular membrane-bounded organelle;intracellular organelle;nucleus;organelle		11.9449	11.997	11.1695	11.6526	12.1861	11.0768	11.3717	10.1905	11.6128	11.0145	11.0665	11.8869	11.5327	10.857	10.7927	11.4175	9.73874	10.8916	11.5806	11.345	10.639	11.8945	10.9329	10.4496	10.3669	10.2429	10.3224	10.6374	10.7258	10.4121	11.4276	11.6725
CNDP2	Q96KP4	Cytosolic non-specific dipeptidase	0.100549	0.0330758	0.00332574		0.350402	-0.106834	-0.037435		0.666167	-0.993958	-0.662142		amine metabolic process;biosynthetic process;cellular amino acid metabolic process;cellular ketone metabolic process;cellular metabolic process;cellular nitrogen compound metabolic process;cellular process;metabolic process;nitrogen compound metabolic process;organic acid metabolic process;peptide metabolic process;primary metabolic process;small molecule metabolic process;sulfur compound metabol…	cell part;cytosol;extracellular organelle;organelle;vesicle		15.3298	15.2891	15.2075	15.4078	15.6272	15.3006	15.4613	15.0343	15.6469	15.2536	15.0832	15.1589	15.339	15.8283	15.0788	15.3918	15.6108	15.4543	15.3108	15.362	15.5692	15.0405	15.7042	15.6039	15.2531	15.0986	15.4061	15.1341	15.6965	NaN	15.2228	15.5029
CNPY2	Q9Y2B0	Protein canopy homolog 2	0.0204957	-0.048847	-0.00100115		0.370276	0.668792	0.247637		0.0804504	0.216877	0.0174478		biological regulation	cell part;endoplasmic reticulum;intracellular membrane-bounded organelle;intracellular organelle;organelle		NaN	13.0129	NaN	13.858	NaN	13.5992	13.8917	13.4809	13.8418	13.8348	13.5725	14.4414	NaN	13.6652	NaN	NaN	NaN	NaN	NaN	13.8239	NaN	14.03	14.3727	NaN	13.5976	NaN	NaN	NaN	13.9752	NaN	13.1601	14.2521
COASY	Q13057	Bifunctional coenzyme A synthase	0.592708	0.466895	0.276732		0.38343	-0.192397	-0.0737708		0.397098	-0.357375	-0.141913		amine metabolic process;biosynthetic process;cellular amino acid metabolic process;cellular ketone metabolic process;cellular metabolic process;cellular nitrogen compound metabolic process;cellular process;cofactor metabolic process;heterocycle metabolic process;metabolic process;nitrogen compound metabolic process;nucleobase-containing compound metabolic process;nucleobase-containing small molec…	cell part;cytoplasm;extracellular organelle;membrane;nucleoplasm;organelle;vesicle	Pantothenate and CoA biosynthesis	10.569	NaN	11.3952	11.4899	11.5123	11.9584	11.8245	11.6634	11.7223	10.8074	11.1216	11.277	11.8783	12.0476	11.7019	12.2743	12.4557	12.384	NaN	11.9731	11.4358	10.9668	11.1798	10.7903	9.84427	11.9671	11.2728	11.3348	11.3523	NaN	11.7942	10.9853
COBL	O75128	Protein cordon-bleu	0.127291	-0.104769	-0.0133362		1.26559	-0.377851	-0.478205		0.460792	0.286048	0.131809		anatomical structure development;anatomical structure formation involved in morphogenesis;cell growth;cellular component assembly;cellular component organization;cellular macromolecular complex assembly;cellular process;cytoskeleton organization;developmental process;growth;macromolecular complex assembly;organelle organization;protein complex assembly;protein polymerization	cell body;cell cortex;cell part;cell projection;macromolecular complex;membrane;neuron projection;neuronal cell body;plasma membrane;protein complex;site of polarized growth		13.7377	13.443	13.566	13.2572	13.3718	13.7257	13.4246	13.6344	13.426	13.2552	13.9076	14.2834	12.7746	13.2763	12.9044	12.5133	13.5831	13.7981	12.8845	11.9088	13.239	12.6122	13.284	12.9569	13.2061	12.5559	12.9224	12.8535	12.4471	13.0458	12.8723	13.4527
COL14A1	Q05707	Collagen alpha-1(XIV) chain	0.24968	0.397	0.099123		1.20144	-1.16019	-1.3939	+	1.00162	0.934995	0.936506		anatomical structure development;biological adhesion;biological regulation;cell adhesion;cellular component disassembly;cellular component organization;cellular process;developmental process;extracellular matrix organization;extracellular structure organization;homeostatic process;macromolecule metabolic process;metabolic process;multicellular organismal process	cell part;extracellular matrix;extracellular organelle;extracellular region;extracellular space;organelle;proteinaceous extracellular matrix;vesicle	Protein digestion and absorption	NaN	12.781	13.0369	NaN	NaN	13.1949	NaN	NaN	13.9366	NaN	11.4397	13.9794	NaN	11.4474	11.9112	NaN	11.9301	12.4187	12.4835	12.0537	12.8131	11.8289	NaN	12.5094	12.4528	11.1957	11.9867	13.0623	13.8911	NaN	13.2508	NaN
COL15A1	P39059	Collagen alpha-1(XV) chain	0.0695413	-0.00983493	-0.000683933		1.23695	-0.15896	-0.196625		0.856163	0.237288	0.203157		anatomical structure formation involved in morphogenesis;biological adhesion;biological regulation;cell adhesion;cell differentiation;cellular component disassembly;cellular component organization;cellular process;developmental process;extracellular matrix organization;extracellular structure organization;macromolecule metabolic process;metabolic process;multicellular organismal process;response …	cell part;extracellular organelle;extracellular region;extracellular space;organelle;vesicle	Protein digestion and absorption	17.9394	18.0401	18.2111	18.0482	17.9033	17.8893	17.9887	17.8665	18.0088	18.054	18.1308	18.8338	17.9902	17.9023	17.9519	17.8015	17.9993	18.3754	17.9966	17.8872	18.1158	18.0241	18.0554	18.2517	17.7299	17.942	18.3577	18.0155	17.9292	17.8924	18.0221	17.9697
COL18A1	P39060	Collagen alpha-1(XVIII) chain	0.453418	0.0906159	0.0410869		0.618938	-0.189263	-0.117142		0.808261	0.257249	0.207925		anatomical structure formation involved in morphogenesis;anatomical structure morphogenesis;biological adhesion;biological regulation;cell adhesion;cell morphogenesis;cellular component disassembly;cellular component morphogenesis;cellular component organization;cellular process;developmental process;extracellular matrix organization;extracellular structure organization;macromolecule metabolic pr…	cell part;extracellular matrix;extracellular organelle;extracellular region;extracellular space;organelle;vesicle	Protein digestion and absorption	15.8448	16.0987	16.2645	15.9376	15.9364	15.942	16.0004	16.1169	16.1938	15.929	15.9303	16.9649	15.9363	16.1559	15.9054	15.9363	16.3474	16.3906	15.917	15.7097	15.8706	15.8762	15.9985	16.1302	16.0111	16.3205	16.6313	16.4936	16.4266	16.3704	16.0394	15.8909
COL1A1	P02452	Collagen alpha-1(I) chain	0.155461	0.3091	0.048053		0.0280982	-0.0811146	-0.00227917		0.205	-0.579219	-0.11874		anatomical structure development;anatomical structure formation involved in morphogenesis;anatomical structure morphogenesis;biological regulation;biosynthetic process;cell activation;cell communication;cell differentiation;cell motility;cellular component assembly;cellular component disassembly;cellular component movement;cellular component organization;cellular localization;cellular membrane or…	cell part;cytoplasmic membrane-bounded vesicle;extracellular matrix;extracellular region;extracellular space;Golgi apparatus;intracellular membrane-bounded organelle;intracellular organelle;organelle;vesicle	Amoebiasis;ECM-receptor interaction;Focal adhesion;Protein digestion and absorption	14.654	15.0384	16.0134	14.2153	16.87	16.2625	15.7641	13.3203	15.5764	13.1849	14.9819	16.8857	13.9648	14.1957	13.8934	13.5822	15.2629	14.6337	15.3243	13.9769	14.9249	17.0277	21.0045	16.2036	15.3299	17.6806	16.0168	14.0418	18.296	17.791	14.4228	17.1025
COL1A2	P08123	Collagen alpha-2(I) chain	0.0451933	0.101845	0.00460272		0.0236444	-0.0718598	-0.00169908		0.254544	-0.7454	-0.189737		anatomical structure development;anatomical structure morphogenesis;biological regulation;cell activation;cell motility;cellular component assembly;cellular component disassembly;cellular component movement;cellular component organization;cellular membrane organization;cellular process;coagulation;developmental process;endocytosis;establishment of localization;extracellular matrix organization;ex…	cell part;extracellular matrix;extracellular organelle;extracellular region;extracellular space;organelle;vesicle	Amoebiasis;ECM-receptor interaction;Focal adhesion;Protein digestion and absorption	13.7082	13.7373	14.5265	13.2507	15.6067	14.791	14.791	12.4744	14.4838	12.2798	13.908	15.6953	12.6903	12.7877	13.2993	12.2442	14.3798	13.1414	14.3584	13.3751	13.7604	16.2408	20.1921	15.1801	14.8693	17.1617	15.5016	12.9077	17.6073	17.2368	13.8157	15.3078
COL3A1	P02461	Collagen alpha-1(III) chain	0.302447	-0.564635	-0.170772		0.14622	-0.44238	-0.0646846		0.289577	-0.836407	-0.242204		aging;anatomical structure development;anatomical structure morphogenesis;biological adhesion;biological regulation;cell activation;cell adhesion;cellular component disassembly;cellular component organization;cellular membrane organization;cellular metabolic process;cellular process;developmental process;endocytosis;establishment of localization;extracellular matrix organization;extracellular str…	cell part;extracellular matrix;extracellular region;extracellular space	Amoebiasis;ECM-receptor interaction;Focal adhesion;Protein digestion and absorption	NaN	11.4801	12.6764	10.7916	13.3188	13.0695	12.2568	10.1938	12.6067	8.13117	11.1748	13.1167	NaN	9.13478	11.0583	9.92033	NaN	10.9952	11.7928	9.65944	NaN	13.5465	17.8197	12.9562	11.4038	14.3244	13.1626	NaN	15.3711	14.9352	NaN	NaN
COL4A1	P02462	Collagen alpha-1(IV) chain	0.355307	-0.946122	-0.336164		0.611731	1.59445	0.975373		0.243138	0.850719	0.206842		anatomical structure development;anatomical structure morphogenesis;cell differentiation;cellular component disassembly;cellular component organization;cellular membrane organization;cellular process;developmental process;endocytosis;establishment of localization;extracellular matrix organization;extracellular structure organization;locomotion;macromolecule metabolic process;membrane invagination…	cell part;extracellular matrix;extracellular region	Amoebiasis;ECM-receptor interaction;Focal adhesion;Pathways in cancer;Protein digestion and absorption;Small cell lung cancer	NaN	NaN	14.7057	15.0002	15.2067	15.0377	14.9615	NaN	NaN	14.4783	NaN	15.2508	NaN	NaN	NaN	NaN	NaN	15.0901	14.7963	NaN	14.14	16.2166	17.4512	15.3568	NaN	16.0847	15.0433	NaN	16.4564	16.2569	13.8154	NaN
COL4A2	P08572	Collagen alpha-2(IV) chain	0.0708465	-0.0848346	-0.00601023		0.375608	0.424635	0.159496		0.249333	-0.446571	-0.111345		anatomical structure formation involved in morphogenesis;biological regulation;biosynthetic process;cell differentiation;cellular component disassembly;cellular component organization;cellular membrane organization;cellular metabolic process;cellular nitrogen compound metabolic process;cellular process;developmental process;endocytosis;establishment of localization;extracellular matrix organizati…	cell part;extracellular matrix;extracellular organelle;extracellular region;intracellular membrane-bounded organelle;intracellular organelle;organelle;vesicle	Amoebiasis;ECM-receptor interaction;Focal adhesion;Pathways in cancer;Protein digestion and absorption;Small cell lung cancer	16.2834	16.0047	16.0786	16.0394	16.8377	16.5029	16.4722	15.5656	16.0889	15.5514	16.0068	16.2177	15.6126	15.4723	15.9675	15.8293	15.7791	15.9259	16.3796	15.7361	15.7918	17.4723	19.5976	16.2902	16.4606	18.0889	16.6642	15.5557	18.1598	18.4214	15.7894	15.6212
COL4A3	Q01955	Collagen alpha-3(IV) chain	0.502777	1.22148	0.614133		0.483299	-1.1714	-0.566134		0.0863614	-0.266819	-0.0230429		biological adhesion;biological regulation;blood circulation;cell adhesion;cell death;cell proliferation;cellular component disassembly;cellular component organization;cellular process;circulatory system process;death;extracellular matrix organization;extracellular structure organization;locomotion;macromolecule metabolic process;metabolic process;multicellular organismal process;neurological syst…	cell part;extracellular region		NaN	NaN	NaN	14.696	14.4465	NaN	15.042	15.0891	14.9185	NaN	13.8356	NaN	14.6358	NaN	14.9178	13.8147	14.5562	NaN	NaN	14.5102	15.3317	NaN	NaN	15.2177	NaN	14.7719	15.2284	14.7502	14.0395	15.0978	13.9394	15.0264
COL6A1	P12109	Collagen alpha-1(VI) chain	0.00250848	0.00119305	2.99273e-06		1.09542	-0.338168	-0.370435		0.388344	0.198795	0.0772008		biological adhesion;cell adhesion;cell differentiation;cellular component assembly;cellular component disassembly;cellular component organization;cellular process;developmental process;extracellular matrix organization;extracellular structure organization;locomotion;macromolecular complex assembly;macromolecule metabolic process;metabolic process;multicellular organismal process;protein complex a…	cell part;extracellular matrix;extracellular organelle;extracellular region;macromolecular complex;membrane;organelle;plasma membrane;protein complex;vesicle	ECM-receptor interaction;Focal adhesion;Protein digestion and absorption	17.7166	18.0325	18.2591	17.8244	17.9602	17.9592	17.9173	17.4466	18.3563	17.6427	17.9237	19.14	17.4653	17.5764	17.6585	17.4514	17.9792	18.2983	17.9073	17.8824	18.0209	17.9319	18.73	18.0304	17.8537	18.2148	18.6331	18.173	18.4222	18.1269	17.6116	17.3263
COL6A2	P12110	Collagen alpha-2(VI) chain	0.0125655	-0.00589275	-7.40455e-05		1.28744	-0.345357	-0.444627		0.401583	0.202568	0.0813478		biological adhesion;cell adhesion;cellular component assembly;cellular component disassembly;cellular component organization;cellular process;extracellular matrix organization;extracellular structure organization;locomotion;macromolecular complex assembly;macromolecule metabolic process;metabolic process;multicellular organismal process;protein complex assembly;response to chemical stimulus;respo…	cell part;extracellular matrix;extracellular organelle;extracellular region;extracellular space;macromolecular complex;membrane;organelle;plasma membrane;protein complex;proteinaceous extracellular matrix;vesicle	ECM-receptor interaction;Focal adhesion;Protein digestion and absorption	18.27	18.6568	18.7314	18.4047	18.5354	18.5028	18.4245	17.9832	18.8803	18.0626	18.3215	19.6833	18.2164	18.1815	18.2601	18.0963	18.5096	18.7507	18.6436	18.5295	18.6535	18.4144	19.2156	18.6572	18.3384	18.7966	19.119	18.6628	19.0323	18.6743	18.2415	17.9513
COL6A3	P12111	Collagen alpha-3(VI) chain	0.00191193	0.000947316	1.8112e-06		1.18174	-0.367427	-0.434204		0.202992	0.117952	0.0239432		anatomical structure development;biological adhesion;cell adhesion;cellular component disassembly;cellular component organization;cellular process;developmental process;extracellular matrix organization;extracellular structure organization;locomotion;macromolecule metabolic process;metabolic process;multicellular organismal process;response to chemical stimulus;response to external stimulus;respo…	cell part;extracellular matrix;extracellular organelle;extracellular region;extracellular space;membrane;organelle;plasma membrane;proteinaceous extracellular matrix;vesicle	ECM-receptor interaction;Focal adhesion;Protein digestion and absorption	18.4711	18.8749	19.0805	18.6493	18.7316	18.6672	18.6852	18.3504	19.2165	18.4343	18.6517	19.8213	18.2405	18.3482	18.3737	18.1219	18.7179	19.0472	18.7975	18.6747	18.8266	18.7064	19.462	18.7621	18.5527	18.9376	19.3268	18.8837	19.1655	18.5786	18.4332	18.0001
COMT	P21964	Catechol O-methyltransferase	1.09371	-0.175516	-0.191964		0.128998	0.0468512	0.0060437		0.709292	-0.146393	-0.103835		alcohol metabolic process;amine metabolic process;behavior;biological regulation;biosynthetic process;catabolic process;cell communication;cell-cell signaling;cellular aromatic compound metabolic process;cellular metabolic process;cellular nitrogen compound metabolic process;cellular process;developmental process;hormone metabolic process;lipid metabolic process;metabolic process;multicellular or…	cell body;cell part;cell projection;cytosol;extracellular organelle;intracellular membrane-bounded organelle;intracellular organelle;membrane;mitochondrion;neuron projection;organelle;plasma membrane;vesicle	Betalain biosynthesis;Steroid hormone biosynthesis;Tyrosine metabolism	17.6811	17.5889	17.7387	17.6445	17.706	17.7374	17.9056	17.7717	17.4985	17.6968	17.6679	17.9286	18.0783	17.8925	18.0026	17.9996	18.1166	17.3703	18.0176	17.6522	18.0629	17.8091	17.9173	17.8473	17.9711	17.9111	17.3128	17.9866	17.8468	17.5728	18.1575	17.9417
COPS3	Q9UNS2	COP9 signalosome complex subunit 3	0.20505	-0.619593	-0.127048		0.709167	1.47373	1.04512		0.735846	-1.87901	-1.38266	+	biological regulation;catabolic process;cellular metabolic process;cellular process;developmental process;embryo development;macromolecule metabolic process;macromolecule modification;metabolic process;primary metabolic process;protein metabolic process;protein modification by small protein conjugation or removal;protein modification process;proteolysis;proteolysis involved in cellular protein ca…	cell part;cytoplasm;intracellular membrane-bounded organelle;intracellular organelle;macromolecular complex;nucleoplasm;nucleus;organelle;protein complex		NaN	13.0891	NaN	14.6245	14.7289	NaN	NaN	14.4562	14.4824	14.4198	14.6557	14.4133	14.5612	NaN	13.6853	NaN	15.033	14.6305	14.88	NaN	NaN	14.4019	NaN	NaN	15.281	14.5724	NaN	14.6852	15.2242	NaN	NaN	NaN
COPS7A	Q9UBW8	COP9 signalosome complex subunit 7a	0.0974777	0.0843678	0.00822397		0.133696	0.199326	0.026649		0.0243336	0.0273636	0.000665856		cellular metabolic process;cellular process;macromolecule metabolic process;macromolecule modification;metabolic process;primary metabolic process;protein metabolic process;protein modification by small protein conjugation or removal;protein modification process	cell part;cytoplasm;macromolecular complex;nucleoplasm;protein complex		NaN	10.6604	NaN	NaN	NaN	10.9299	11.2063	10.9111	11.7543	11.6662	11.7008	11.1362	10.5024	11.966	11.254	13.027	11.714	11.5946	NaN	10.1587	NaN	10.664	NaN	11.5429	NaN	11.0253	NaN	9.91464	NaN	NaN	NaN	11.8142
COQ10A	Q96MF6	Coenzyme Q-binding protein COQ10 homolog A, mitochondrial	0.103215	0.0555482	0.00573339		0.341948	0.175989	0.0601791		0.428	-0.701578	-0.300275			cell part;membrane		15.9963	15.7037	15.949	15.9883	16.0856	16.2447	15.738	16.0637	16.0301	16.1963	16.09	NaN	16.6542	16.5183	16.6204	16.8011	16.6966	16.4892	16.191	16.5681	16.4569	16.458	15.5408	16.0728	16.2724	16.0827	15.6099	15.9577	16.1418	15.7606	16.4175	16.6662
COQ5	Q5HYK3	2-methoxy-6-polyprenyl-1,4-benzoquinol methylase, mitochondrial	0.684106	0.335196	0.229309		0.36027	0.16759	0.0603777		0.170914	0.0736794	0.0125928		biosynthetic process;cellular ketone metabolic process;cellular metabolic process;cellular process;cofactor metabolic process;metabolic process;one-carbon metabolic process;small molecule metabolic process	cell part;intracellular membrane-bounded organelle;intracellular organelle;membrane;mitochondrion;organelle	Ubiquinone and other terpenoid-quinone biosynthesis	14.203	15.1733	14.7645	14.7862	15.1115	15.1874	15.1365	15.4727	15.1967	15.2065	14.8058	15.0132	15.7655	15.5824	15.3861	15.5144	15.2289	14.9057	15.0766	15.6085	15.6474	15.4789	14.789	15.4503	15.519	15.5685	14.527	15.3655	15.4483	15.56	15.585	15.8915
COQ6	Q9Y2Z9	Ubiquinone biosynthesis monooxygenase COQ6, mitochondrial	0.733619	0.230179	0.168864		0.264601	0.0900949	0.0238392		0.594858	-0.322665	-0.19194		biosynthetic process;cellular ketone metabolic process;cellular metabolic process;cellular process;cofactor metabolic process;metabolic process;small molecule metabolic process	cell part;cell projection;Golgi apparatus;intracellular membrane-bounded organelle;intracellular organelle;membrane;mitochondrion;organelle	Ubiquinone and other terpenoid-quinone biosynthesis	14.5056	14.5678	14.4324	14.4599	14.3398	14.7288	14.4113	14.3789	14.7428	15.0259	14.7572	14.5928	14.9124	14.8835	14.662	14.4346	15.1182	14.8058	14.4147	14.8431	14.8722	14.9214	14.8904	14.6076	14.0917	14.8071	14.5083	14.6361	14.9216	13.3121	14.8509	15.0873
COQ8A	Q8NI60	Atypical kinase COQ8A, mitochondrial	0.0937367	0.0530605	0.00497372		0.586588	0.314786	0.18465		0.650078	-0.269444	-0.175159		biosynthetic process;cellular ketone metabolic process;cellular metabolic process;cellular process;cofactor metabolic process;metabolic process;phosphorus metabolic process;small molecule metabolic process	cell part;intracellular membrane-bounded organelle;intracellular organelle;mitochondrion;organelle		16.7701	16.9013	16.4719	16.7561	16.9946	17.2241	16.8699	17.0066	16.9659	17.1934	17.2143	16.3548	17.7177	17.8337	17.5821	17.59	17.6249	17.2232	17.3354	17.5253	17.5372	17.6056	17.0679	17.2052	17.092	17.0522	16.2405	17.0278	16.902	16.2979	17.5155	17.3
COQ9	O75208	Ubiquinone biosynthesis protein COQ9, mitochondrial	0.971329	0.30377	0.295061		0.375226	0.220971	0.0829142		0.529953	-0.16965	-0.0899064		biosynthetic process;cellular ketone metabolic process;cellular metabolic process;cellular process;cofactor metabolic process;generation of precursor metabolites and energy;metabolic process;small molecule metabolic process	cell part;intracellular membrane-bounded organelle;intracellular organelle;mitochondrion;organelle		15.4278	15.6181	15.043	15.1978	15.6051	15.567	15.0292	15.419	15.4531	15.4369	15.5086	15.443	15.938	15.8596	15.9737	16.4072	16.0076	15.8636	15.4907	16.1033	15.8883	15.7227	15.3766	15.4132	15.2073	15.702	14.6791	15.4658	15.4686	14.9325	15.7625	15.976
CORO6	Q6QEF8	Coronin-6	0.671124	-0.120533	-0.0808925		0.742376	-0.101544	-0.0753839		0.405032	-0.118585	-0.0480306		cellular component organization;cellular process;cytoskeleton organization;organelle organization	cell part;cytoskeleton;intracellular non-membrane-bounded organelle;intracellular organelle;organelle		17.386	17.1757	17.0155	17.2937	17.0989	17.1222	17.1377	17.1993	17.2944	17.0869	17.2914	16.9989	17.3299	17.1872	17.191	17.0252	17.2851	16.882	16.9964	17.0453	17.2138	17.1532	16.8954	17.1896	17.1233	17.0245	17.3812	17.1198	16.9444	16.4811	17.1397	16.7579
COX17	Q14061	Cytochrome c oxidase copper chaperone	0.460033	0.282024	0.12974		0.0305336	0.0268582	0.000820077		0.256348	-0.334005	-0.0856215		anatomical structure development;cellular metabolic process;cellular process;developmental process;establishment of localization;generation of precursor metabolites and energy;ion transport;metabolic process;transport	cell part;cytoplasm;intracellular membrane-bounded organelle;intracellular organelle;mitochondrion;organelle	Oxidative phosphorylation	12.1097	13.3151	13.6889	13.0038	12.932	13.405	12.6387	13.1716	12.0522	13.6678	13.5161	13.2615	13.676	13.0961	13.5898	13.3933	13.2553	13.4732	13.435	13.9049	13.0499	12.8055	13.188	12.8378	13.6852	13.5854	12.5377	12.7693	12.369	NaN	13.0723	13.2358
COX4I1	P13073	Cytochrome c oxidase subunit 4 isoform 1, mitochondrial	0.260905	0.191915	0.0500715		0.20915	0.139191	0.0291118		0.388223	-0.261519	-0.101528		biosynthetic process;cellular metabolic process;cellular nitrogen compound metabolic process;cellular process;generation of precursor metabolites and energy;macromolecule metabolic process;metabolic process;nitrogen compound metabolic process;nucleobase-containing compound metabolic process;primary metabolic process;response to chemical stimulus;response to external stimulus;response to extracell…	cell part;extracellular organelle;intracellular membrane-bounded organelle;intracellular organelle;membrane;mitochondrion;nucleus;organelle;vesicle	Alzheimer's disease;Cardiac muscle contraction;Huntington's disease;Oxidative phosphorylation;Parkinson's disease	17.5987	17.8022	17.714	17.6897	17.8195	17.5339	17.2135	17.8523	18.3392	18.0424	18.1343	17.4137	18.7427	18.8655	18.6026	18.9248	18.7733	18.7895	18.201	18.7982	18.1841	18.3622	17.3386	17.7929	18.6936	18.2281	17.2842	17.697	17.8514	17.1414	18.2795	18.3341
COX5A	P20674	Cytochrome c oxidase subunit 5A, mitochondrial	0.674503	0.415735	0.280415		0.0143579	0.0100039	0.000143635		0.0361544	0.0276249	0.000998762		biosynthetic process;cellular metabolic process;cellular nitrogen compound metabolic process;cellular process;generation of precursor metabolites and energy;macromolecule metabolic process;metabolic process;nitrogen compound metabolic process;nucleobase-containing compound metabolic process;primary metabolic process;RNA metabolic process;small molecule metabolic process;transcription initiation, …	cell part;extracellular organelle;membrane;organelle;vesicle	Alzheimer's disease;Cardiac muscle contraction;Huntington's disease;Oxidative phosphorylation;Parkinson's disease	14.8216	15.2384	15.0329	15.1092	15.3859	15.0598	14.5265	15.1026	15.8326	15.5776	14.9242	14.6732	15.699	16.2416	15.8465	16.0284	15.6968	16.3233	15.3788	15.6186	15.517	15.3214	15.154	15.4392	15.8958	15.4573	14.6542	15.0965	15.1221	14.7635	14.2983	15.456
COX6B1	P14854	Cytochrome c oxidase subunit 6B1	0.280635	0.186638	0.0523772		0.534967	0.634877	0.339638		0.234145	-0.160494	-0.0375789		anatomical structure development;biosynthetic process;cellular metabolic process;cellular nitrogen compound metabolic process;cellular process;developmental process;generation of precursor metabolites and energy;macromolecule metabolic process;metabolic process;nitrogen compound metabolic process;nucleobase-containing compound metabolic process;primary metabolic process;RNA metabolic process;smal…	cell part;intracellular membrane-bounded organelle;intracellular organelle;membrane;mitochondrion;organelle	Alzheimer's disease;Cardiac muscle contraction;Huntington's disease;Oxidative phosphorylation;Parkinson's disease	14.832	14.1681	14.6896	13.6618	14.6829	14.5639	13.5065	14.3257	14.4416	15.127	14.4613	14.2194	15.2318	14.952	14.8175	15.4698	15.4203	15.2	14.3298	14.3987	14.215	14.7461	14.2606	13.5777	14.2121	14.8698	NaN	14.7691	14.2058	14.6526	14.5079	15.0255
COX7A1	P24310	Cytochrome c oxidase subunit 7A1, mitochondrial	0.226317	-0.340427	-0.0770446		0.313472	0.213727	0.0669972		0.942165	-1.0151	-0.956388		cellular metabolic process;cellular process;generation of precursor metabolites and energy;metabolic process	cell part;intracellular membrane-bounded organelle;intracellular organelle;mitochondrion;organelle	Alzheimer's disease;Cardiac muscle contraction;Huntington's disease;Oxidative phosphorylation;Parkinson's disease	12.7728	NaN	13.3755	12.8419	12.8491	13.7214	12.8128	12.4757	13.9992	14.1325	14.2096	NaN	13.4038	13.8857	13.3488	13.9117	13.6815	13.1946	13.4756	14.2895	13.7827	13.6672	12.9712	13.3545	14.5457	13.7286	12.5585	13.2284	14.0624	NaN	13.625	13.6187
CP	P00450	Ceruloplasmin	0.753965	0.773556	0.583235		0.212018	-0.168401	-0.0357041		0.237894	-0.146749	-0.0349106		biological regulation;cellular homeostasis;cellular ion homeostasis;cellular process;establishment of localization;homeostatic process;ion transport;transmembrane transport;transport	cell part;extracellular organelle;extracellular region;extracellular space;membrane;organelle;vesicle	Porphyrin and chlorophyll metabolism	NaN	15.7108	15.6032	15.4061	15.3371	14.7909	15.6422	14.965	14.7041	15.3008	15.2714	15.6828	14.3632	14.8888	15.5443	15.4445	15.3892	14.6896	14.4183	14.8622	14.5059	13.7783	14.9805	14.2848	14.4337	14.6795	15.034	14.7234	14.3432	14.8752	15.4034	16.1311
CPA3	P15088	Mast cell carboxypeptidase A	0.638784	-1.31061	-0.837198		0.218898	-0.648471	-0.141949		0.220439	-0.554019	-0.122128		biological regulation;cellular metabolic process;cellular process;hormone metabolic process;macromolecule metabolic process;metabolic process;primary metabolic process;protein maturation;protein metabolic process;proteolysis	cell part;cytoplasmic membrane-bounded vesicle;extracellular region;intracellular membrane-bounded organelle;intracellular organelle;organelle;vesicle	Pancreatic secretion;Protein digestion and absorption;Renin-angiotensin system	15.7618	15.9861	15.8927	15.2351	16.5575	16.2679	15.025	14.278	15.4084	15.0861	14.849	16.3532	NaN	NaN	15.0133	NaN	15.2826	NaN	14.8908	NaN	16.1765	15.1437	15.862	15.5557	15.3272	15.3969	15.3431	NaN	15.2182	15.8025	15.5781	NaN
CPEB3	Q8NE35	Cytoplasmic polyadenylation element-binding protein 3	2.0756	0.585876	1.21605	+	0.503851	0.22933	0.115548		4.75123	0.952768	4.52682	+				11.3426	11.9928	11.6377	11.7983	11.1876	12.1967	11.1656	12.5202	11.631	12.4129	11.3433	12.4066	11.9081	11.8668	12.7089	11.8499	11.3435	12.3018	12.0978	12.4697	11.7448	11.9854	11.4977	12.4303	11.7217	12.3004	12.1042	12.4504	11.7583	12.6692	11.514	12.1153
CPNE1	Q99829	Copine-1	0.773126	0.771534	0.596493		0.223247	0.299895	0.0669506		0.523601	-0.679577	-0.355827		biological regulation;biosynthetic process;cellular lipid metabolic process;cellular metabolic process;cellular process;establishment of localization;lipid metabolic process;macromolecule metabolic process;metabolic process;primary metabolic process;protein metabolic process;proteolysis;response to chemical stimulus;response to stimulus;small molecule metabolic process;transport;vesicle-mediated …	cell part;cytoplasm;cytosol;extracellular organelle;intracellular membrane-bounded organelle;intracellular organelle;membrane;nucleus;organelle;plasma membrane;vesicle		NaN	NaN	NaN	NaN	10.8414	NaN	12.3041	NaN	10.2618	NaN	11.1902	12.7125	NaN	11.9146	13.0019	NaN	12.8917	NaN	12.0137	12.3881	11.6665	NaN	11.2746	11.8196	10.7556	11.3166	NaN	NaN	11.5114	NaN	NaN	14.032
CPPED1	Q9BRF8	Serine/threonine-protein phosphatase CPPED1	0.0048189	-0.00483338	-2.32916e-05		0.197345	-0.131248	-0.0259012		0.282631	0.242883	0.0686462			cell part;cytoplasm;extracellular organelle;organelle;vesicle		12.4639	12.6658	12.7389	12.6592	13.0699	12.7588	12.7526	12.8413	12.6136	12.1947	12.2583	13.3716	11.4576	11.027	11.2556	11.7448	11.2548	11.5449	12.079	11.9211	12.6137	11.9205	12.7437	12.3995	11.6343	11.6374	12.0549	12.4388	11.8628	12.3296	11.8001	12.066
CPT1B	Q92523	Carnitine O-palmitoyltransferase 1, muscle isoform	0.0159827	-0.00778453	-0.000124417		0.988085	0.163216	0.161271		1.00048	-0.473219	-0.473446		amine transport;amino acid transport;catabolic process;cellular ketone metabolic process;cellular lipid metabolic process;cellular metabolic process;cellular process;establishment of localization;ion transport;lipid metabolic process;lipid transport;metabolic process;organic acid metabolic process;organic acid transport;primary metabolic process;small molecule metabolic process;transmembrane tran…	cell part;intracellular membrane-bounded organelle;intracellular organelle;membrane;mitochondrion;organelle	Adipocytokine signaling pathway;Fatty acid metabolism;PPAR signaling pathway	16.3283	16.1823	16.3323	16.4143	16.5671	16.9324	16.426	16.2257	16.5623	16.759	16.7817	15.0289	16.7616	16.8716	16.5281	16.6886	16.5099	15.9607	16.6131	16.718	16.5739	16.6146	16.4194	16.1574	16.6633	16.9148	16.1755	16.4158	16.4858	15.9924	17.0019	16.8352
CPT2	P23786	Carnitine O-palmitoyltransferase 2, mitochondrial	0.462479	0.56841	0.262878		0.159081	0.206587	0.0328641		0.0548095	0.113124	0.00620025		amine transport;amino acid transport;catabolic process;cellular ketone metabolic process;cellular lipid metabolic process;cellular metabolic process;cellular process;establishment of localization;ion transport;lipid metabolic process;lipid transport;metabolic process;organic acid metabolic process;organic acid transport;primary metabolic process;small molecule metabolic process;transmembrane tran…	cell part;intracellular membrane-bounded organelle;intracellular non-membrane-bounded organelle;intracellular organelle;membrane;mitochondrion;nucleolus;nucleoplasm;organelle	Fatty acid metabolism;PPAR signaling pathway	13.6323	13.3098	13.4312	13.9909	14.416	13.6711	13.7807	14.2467	14.3227	13.9483	13.9205	14.0141	14.1677	13.8288	13.7575	13.9526	14.2963	14.1494	13.677	13.9684	14.5098	14.5289	NaN	14.0451	NaN	13.4103	NaN	13.4906	13.7991	NaN	13.7927	14.2451
CRAT	P43155	Carnitine O-acetyltransferase	0.214998	0.101567	0.0218367		0.672799	0.179131	0.120519		0.943953	-0.40054	-0.378091		amine metabolic process;catabolic process;cellular amino acid metabolic process;cellular ketone metabolic process;cellular lipid metabolic process;cellular metabolic process;cellular nitrogen compound metabolic process;cellular process;establishment of localization;lipid metabolic process;metabolic process;nitrogen compound metabolic process;organic acid metabolic process;primary metabolic proces…	cell part;endoplasmic reticulum;intracellular membrane-bounded organelle;intracellular organelle;membrane;microbody;mitochondrion;organelle;peroxisome	Peroxisome	16.9657	16.8166	16.7817	16.9554	17.2291	17.2878	17.1953	17.2182	16.9707	17.2819	17.4421	16.4002	17.6983	17.7465	17.383	17.4504	17.5781	17.2024	17.0717	17.3504	17.3561	17.3958	17.2881	17.2327	17.0068	17.4982	16.9803	17.2894	17.2976	16.1167	17.692	17.6093
CRIP2	P52943	Cysteine-rich protein 2	0.402101	0.155247	0.0624251		0.160901	0.0868475	0.0139739		2.09046	0.497376	1.03975		anatomical structure development;biological regulation;developmental process	cell cortex;cell part		14.2707	14.5614	14.1446	14.6238	14.3185	14.723	14.9429	14.5268	14.9205	14.4757	14.4699	15.1571	14.5808	15.1308	15.2695	15.1617	14.5119	15.1455	14.5004	14.5116	14.5077	15.0318	14.4026	15.1459	14.8799	15.3278	15.2114	14.9507	15.1411	15.3607	14.6595	14.7073
CRKL	P46109	Crk-like protein	0.219304	-0.0830269	-0.0182081		0.370777	0.0896851	0.0332532		1.00067	0.214804	0.214947		anatomical structure development;anatomical structure morphogenesis;biological regulation;cellular metabolic process;cellular process;developmental process;macromolecule metabolic process;macromolecule modification;metabolic process;phosphorus metabolic process;primary metabolic process;protein metabolic process;protein modification process;protein phosphorylation;regulation of protein modificati…	cell part;cytosol;endosome;extracellular organelle;intracellular membrane-bounded organelle;intracellular organelle;organelle;vesicle	Bacterial invasion of epithelial cells;Chemokine signaling pathway;Chronic myeloid leukemia;ErbB signaling pathway;Fc gamma R-mediated phagocytosis;Focal adhesion;Insulin signaling pathway;MAPK signaling pathway;Neurotrophin signaling pathway;Pathways in cancer;Regulation of actin cytoskeleton;Renal cell carcinoma;Shigellosis	15.9636	15.8854	15.9605	15.9359	15.8706	15.5711	15.869	16.0006	15.7484	15.9554	15.5632	16.0688	15.7207	15.0243	15.6975	15.5181	15.7044	15.8608	15.6236	15.6235	15.7046	15.7686	15.5396	15.6969	15.8745	15.8509	15.311	15.7991	15.7245	16.3021	15.6575	15.8261
CRYAB	P02511	Alpha-crystallin B chain	5.76704	1.93697	11.1706	+	2.54563	1.51806	3.86442	+	2.86335	1.15431	3.30519	+	aging;anatomical structure development;biological regulation;cell death;cellular component assembly;cellular component organization;cellular macromolecular complex assembly;cellular metabolic process;cellular process;cytoskeleton organization;death;developmental process;macromolecular complex assembly;macromolecule metabolic process;metabolic process;multicellular organismal process;muscle contra…	cell part;cell surface;cytoplasm;cytoskeleton;cytosol;extracellular organelle;Golgi apparatus;intracellular membrane-bounded organelle;intracellular non-membrane-bounded organelle;intracellular organelle;membrane;mitochondrion;nucleus;organelle;plasma membrane;vesicle	Protein processing in endoplasmic reticulum	18.1078	19.7184	17.1228	19.1003	18.0234	19.4167	18.3378	20.7472	19.0148	20.323	18.5618	18.9138	18.6843	20.5109	19.1731	20.319	19.1569	19.3962	18.2943	19.794	18.4322	19.548	17.8929	19.2304	17.9975	20.0461	17.5963	19.5238	18.1324	19.7299	18.0459	20.2727
CRYZ	Q08257	Quinone oxidoreductase	0.335913	-0.131352	-0.0441229		0.467283	0.149392	0.0698082		0.183325	-0.097326	-0.0178423		catabolic process;cellular component assembly;cellular component organization;cellular metabolic process;cellular process;macromolecular complex assembly;metabolic process;multicellular organismal process;neurological system process;protein complex assembly;xenobiotic metabolic process	cell part;cytoplasm;cytosol;extracellular organelle;Golgi apparatus;intracellular membrane-bounded organelle;intracellular organelle;organelle;vesicle		16.0984	15.7332	15.5484	16.2133	15.7316	16.0119	16.7855	16.5425	16.2816	16.5521	16.6217	16.809	16.3501	16.1489	16.2669	16.4619	16.1794	16.0489	15.8642	16.1874	16.3891	16.4205	16.1831	15.6449	16.304	16.3677	16.3173	16.1511	16.0744	15.6261	16.5204	16.1549
CS	O75390	Citrate synthase, mitochondrial	0.423094	0.207534	0.0878064		0.433643	0.243243	0.105481		0.407425	-0.2363	-0.0962744		carbohydrate metabolic process;catabolic process;cellular metabolic process;cellular process;cofactor metabolic process;metabolic process;primary metabolic process;small molecule metabolic process	cell part;extracellular organelle;intracellular membrane-bounded organelle;intracellular organelle;mitochondrion;nucleus;organelle;vesicle	Citrate cycle (TCA cycle);Glyoxylate and dicarboxylate metabolism	17.6432	17.8069	17.3458	17.6172	17.8542	17.7761	17.7051	17.8122	18.0774	17.8965	17.9098	17.5868	18.7103	18.7075	18.361	18.6817	18.8331	18.6418	17.8416	18.2014	17.977	17.9537	17.7852	17.8406	17.6092	18.0321	16.9738	17.8888	17.9674	17.0721	18.1717	18.3662
CSDE1	O75534	Cold shock domain-containing protein E1	0.699244	-0.120305	-0.0841223		0.131067	0.0475755	0.00623558		1.13826	-0.282495	-0.321552		anatomical structure development;biological regulation;catabolic process;cellular metabolic process;cellular nitrogen compound metabolic process;cellular process;developmental process;macromolecule metabolic process;metabolic process;mRNA metabolic process;nitrogen compound metabolic process;nucleobase-containing compound metabolic process;primary metabolic process;RNA catabolic process;RNA metab…	cell part;cytoplasm;Golgi apparatus;intracellular membrane-bounded organelle;intracellular organelle;macromolecular complex;membrane;organelle;plasma membrane;protein complex		16.4041	16.6166	15.816	16.4829	16.5607	16.2951	16.2461	16.308	16.1363	16.3852	16.1513	16.4928	16.4987	16.2944	16.4252	16.0245	16.1873	15.7228	16.3473	16.2031	16.6023	16.2809	16.7601	16.0632	16.6402	16.3694	16.2382	16.3266	16.4607	16.0917	16.5376	16.1607
CSE1L	P55060	Exportin-2	0.898373	-0.140193	-0.125946		0.0653194	-0.0410266	-0.00267983		0.812246	-0.328417	-0.266755		cell death;cell proliferation;cellular process;death;establishment of localization;nuclear transport;nucleocytoplasmic transport;protein targeting;protein transport;transport	cell part;cytoplasm;extracellular organelle;intracellular membrane-bounded organelle;intracellular organelle;membrane;nucleoplasm;nucleus;organelle;vesicle		12.7463	12.2893	12.3549	12.3655	12.793	12.7162	12.6194	12.5098	11.9129	12.725	12.479	12.1882	12.6807	12.4089	11.9499	12.7728	11.9893	12.7044	12.2888	12.4085	13.0683	11.9119	12.9696	11.9044	12.3545	12.3753	12.4406	12.1062	12.5604	NaN	12.6516	12.5083
CSNK1A1	P48729	Casein kinase I isoform alpha	0.891581	0.308051	0.274652		0.291525	0.138487	0.0403725		0.171871	0.155528	0.0267308		biological regulation;cell division;cellular component organization;cellular membrane organization;cellular metabolic process;cellular process;endocytosis;establishment of localization;macromolecule metabolic process;macromolecule modification;membrane invagination;membrane organization;metabolic process;mitosis;nuclear division;organelle fission;organelle organization;peptidyl-amino acid modific…	cell part;cell projection;centrosome;cilium;cytoplasm;cytosol;intracellular non-membrane-bounded organelle;intracellular organelle;kinetochore;macromolecular complex;membrane;microtubule organizing center;organelle;protein complex	Hedgehog signaling pathway;Wnt signaling pathway	13.4691	13.7127	13.916	13.5124	13.5823	13.5039	13.3559	13.2886	13.7437	13.7662	13.4168	13.9578	12.8609	13.2198	13.2906	13.8222	13.237	12.255	13.5258	13.6708	13.4102	13.7473	12.006	13.7307	12.5112	13.2253	13.1353	12.8588	13.4278	13.733	13.0191	13.4731
CSRP1	P21291	Cysteine and glycine-rich protein 1	0.160017	-0.161602	-0.0258591		0.41839	-0.404226	-0.169124		0.125516	0.113507	0.014247		biological adhesion;cell adhesion;cellular process	cell part;extracellular organelle;intracellular membrane-bounded organelle;intracellular organelle;nucleus;organelle;vesicle		13.0995	14.0305	12.6371	12.6138	13.0695	13.007	13.3526	NaN	13.404	12.666	13.8009	13.6404	13.666	14.3263	12.9079	12.396	13.095	12.9779	14.1166	13.6541	13.9716	14.2036	13.0327	13.9278	13.7771	14.2136	14.3949	14.2258	14.3513	13.9876	13.9719	12.53
CSRP3	P50461	Cysteine and glycine-rich protein 3	0.155419	0.093434	0.0145214		0.119327	-0.037645	-0.00449208		0.638181	0.23794	0.151849		anatomical structure development;anatomical structure formation involved in morphogenesis;biological regulation;cellular component assembly;cellular component organization;cellular homeostasis;cellular ion homeostasis;cellular localization;cellular process;cytoskeleton organization;detection of stimulus;developmental process;homeostatic process;localization;multicellular organismal process;muscle…	cell part;cytoskeleton;intracellular membrane-bounded organelle;intracellular non-membrane-bounded organelle;intracellular organelle;nucleus;organelle		18.4555	18.4116	18.3709	18.7224	17.882	18.3444	18.5759	18.7711	18.3378	18.2909	18.4825	18.1569	17.6921	17.5694	18.1711	18.0716	17.5844	17.7579	18.4794	18.4302	18.5891	18.6145	18.3058	18.5149	18.2145	18.1716	18.439	18.3492	18.2335	18.6225	17.6355	18.2596
CSTA	P01040	Cystatin-A	0.585474	0.506811	0.296725		0.223958	0.322212	0.0721619		0.156373	-0.234833	-0.0367215		biological adhesion;biological regulation;cell adhesion;cell differentiation;cellular metabolic process;cellular process;developmental process;macromolecule metabolic process;macromolecule modification;metabolic process;primary metabolic process;protein metabolic process;protein modification process	cell part;cytoplasm;cytoskeleton;extracellular organelle;extracellular space;intracellular membrane-bounded organelle;intracellular non-membrane-bounded organelle;intracellular organelle;nucleoplasm;nucleus;organelle;vesicle		14.5446	14.5543	13.2605	15.2788	14.6028	15.0097	14.2035	16.6871	13.5622	14.6139	15.3224	14.6511	14.3656	15.2063	15.0216	15.6384	15.3909	15.9819	14.407	14.2813	14.358	13.2481	14.3093	15.0661	14.4638	13.9861	15.4933	15.7845	13.9224	NaN	15.1601	15.4704
CSTF3	Q12996	Cleavage stimulation factor subunit 3	0.0455347	0.0743338	0.00338477		0.141498	0.280082	0.0396311		0.0481103	0.0701788	0.00337632		biosynthetic process;cellular metabolic process;cellular nitrogen compound metabolic process;cellular process;macromolecule metabolic process;metabolic process;mRNA metabolic process;mRNA processing;nitrogen compound metabolic process;nucleobase-containing compound metabolic process;primary metabolic process;RNA metabolic process;RNA processing;RNA splicing;transcription from RNA polymerase II pr…	cell part;intracellular membrane-bounded organelle;intracellular organelle;nucleoplasm;nucleus;organelle	mRNA surveillance pathway	9.53382	9.65024	10.5783	9.44184	9.33557	8.14938	8.47142	NaN	NaN	8.4949	10.3703	11.0398	NaN	NaN	9.88178	9.1711	9.21456	NaN	NaN	10.6928	9.27837	NaN	NaN	NaN	NaN	NaN	10.6876	NaN	9.93754	NaN	10.258	9.06203
CTNND1	O60716	Catenin delta-1	0.383931	0.437097	0.167815		0.328333	-0.28373	-0.093158		0.157926	-0.108029	-0.0170606		anatomical structure development;biological adhesion;biological regulation;biosynthetic process;cell adhesion;cell junction organization;cellular component assembly;cellular component organization;cellular metabolic process;cellular nitrogen compound metabolic process;cellular process;developmental process;macromolecule metabolic process;metabolic process;nitrogen compound metabolic process;nucle…	cell part;cell projection;cytoplasm;cytosol;extracellular organelle;intracellular membrane-bounded organelle;intracellular organelle;membrane;midbody;neuron projection;nucleus;organelle;plasma membrane;site of polarized growth;synapse;vesicle	Adherens junction;Leukocyte transendothelial migration	11.8724	12.9047	12.4336	10.8401	12.3321	11.042	10.7129	13.0937	12.2004	12.7133	12.53	12.842	12.4619	12.4326	12.5924	12.8216	12.3032	12.4891	12.7753	11.5629	12.1278	NaN	12.0571	12.1407	NaN	12.566	12.3749	12.7563	NaN	12.1251	12.814	11.2522
CTSD	P07339	Cathepsin D	1.18679	0.135247	0.16051		0.0917435	-0.0429675	-0.00394199		0.294299	0.18172	0.05348		autophagy;catabolic process;cellular component disassembly;cellular component organization;cellular metabolic process;cellular process;extracellular matrix organization;extracellular structure organization;immune system process;macromolecule metabolic process;metabolic process;multicellular organismal process;primary metabolic process;protein catabolic process;protein metabolic process;proteolysis	cell part;cytoplasmic membrane-bounded vesicle;extracellular organelle;extracellular region;extracellular space;intracellular membrane-bounded organelle;intracellular organelle;lysosome;organelle;vacuole;vesicle	ko05152;Lysosome	16.3756	16.6263	16.3179	16.2512	16.3918	16.4132	16.4181	16.619	16.4356	16.3531	16.5511	17.8666	16.4925	16.5854	16.6363	16.9936	16.6358	16.8954	16.4785	16.5163	16.6471	16.4606	16.4856	16.5631	16.6038	16.8805	17.0784	17.0348	16.554	15.9572	16.5574	16.5099
CTSG	P08311	Cathepsin G	0.743289	1.09726	0.81558		0.710224	-0.465407	-0.330543		1.29562	0.888781	1.15152	+	biological regulation;cell killing;cellular component disassembly;cellular component organization;cellular metabolic process;cellular process;extracellular matrix organization;extracellular structure organization;hormone metabolic process;immune system process;interspecies interaction between organisms;killing of cells of other organism;macromolecule metabolic process;macromolecule modification;m…	cell part;cell surface;cytoplasmic membrane-bounded vesicle;extracellular organelle;extracellular region;extracellular space;intracellular membrane-bounded organelle;intracellular organelle;membrane;nucleus;organelle;plasma membrane;vesicle	Amoebiasis;Lysosome;Neuroactive ligand-receptor interaction;Renin-angiotensin system;Systemic lupus erythematosus	NaN	15.4525	16.1774	14.4938	14.543	14.9461	15.0036	15.0933	15.4351	15.2806	15.4635	16.9509	14.6147	15.3199	14.9697	15.4051	15.7651	15.4797	14.8511	14.8913	14.562	14.182	14.9478	15.6894	14.0824	15.3156	14.9268	14.5006	14.2933	16.7978	15.2745	14.6938
CTTN	Q14247	Src substrate cortactin	0.299142	-0.0735083	-0.0219894		0.363556	-0.100256	-0.0364489		0.20583	0.0736194	0.015153		anatomical structure morphogenesis;biological regulation;cell junction organization;cell motility;cellular component assembly;cellular component morphogenesis;cellular component movement;cellular component organization;cellular macromolecular complex assembly;cellular membrane organization;cellular process;cytoskeleton organization;developmental process;endocytosis;establishment of localization;l…	cell cortex;cell part;cell projection;cytoplasm;cytoskeleton;extracellular organelle;intracellular non-membrane-bounded organelle;intracellular organelle;macromolecular complex;membrane;neuron projection;organelle;plasma membrane;protein complex;vesicle	Bacterial invasion of epithelial cells;Pathogenic Escherichia coli infection;Shigellosis;Tight junction	15.467	15.5649	15.469	15.6768	15.5767	15.415	15.7143	15.3802	15.7989	15.7449	15.4865	16.1747	15.7684	15.6598	15.7629	15.7613	15.3585	15.7595	15.5875	15.4655	15.6976	15.4305	15.5382	15.2585	15.1845	15.5431	16.0124	15.8139	15.725	15.4399	15.841	15.5081
CUL1	Q13616	Cullin-1	0.358681	0.296868	0.106481		0.399937	-0.363642	-0.145434		0.674399	0.639505	0.431282		anatomical structure morphogenesis;biological regulation;catabolic process;cell cycle;cell proliferation;cellular metabolic process;cellular process;developmental process;immune system process;macromolecule metabolic process;macromolecule modification;metabolic process;mitotic cell cycle;primary metabolic process;protein metabolic process;protein modification by small protein conjugation or remov…	cell part;cytosol;macromolecular complex;nucleoplasm;protein complex;ubiquitin ligase complex	Cell cycle;Cell cycle - yeast;Circadian rhythm - mammal;Oocyte meiosis;Protein processing in endoplasmic reticulum;TGF-beta signaling pathway;Ubiquitin mediated proteolysis;Wnt signaling pathway	13.5137	12.4654	13.5015	12.44	12.8706	13.2282	12.5743	12.6024	12.2668	13.245	12.1728	12.7038	12.4377	12.413	11.9288	13.5157	NaN	12.3854	13.146	12.5355	13.2609	11.9095	12.4078	11.57	NaN	13.3128	NaN	NaN	NaN	NaN	NaN	13.7709
CUL2	Q13617	Cullin-2	1.31341	-0.2691	-0.353438		0.474233	-0.157601	-0.0747395		0.991807	-0.262649	-0.260497		biological regulation;cellular metabolic process;cellular process;macromolecule metabolic process;macromolecule modification;metabolic process;primary metabolic process;protein metabolic process;protein modification by small protein conjugation or removal;protein modification process;regulation of cell cycle;response to chemical stimulus;response to stimulus;response to stress;viral reproduction	cell part;cytosol;macromolecular complex;nucleoplasm;protein complex;ubiquitin ligase complex	Pathways in cancer;Renal cell carcinoma;Ubiquitin mediated proteolysis	14.5355	14.5467	14.4818	14.3884	14.1833	14.2055	14.3138	13.882	13.9069	13.6322	14.3705	13.5688	14.2386	13.8064	14.277	13.954	13.9867	14.0035	14.4197	14.2575	14.6464	14.2735	14.1614	14.3484	14.3599	14.1064	14.1424	14.2682	14.084	13.5473	14.3076	13.9613
CUL3	Q13618	Cullin-3	0.0306696	-0.00871706	-0.000267349		0.020976	0.00984589	0.000206528		0.360555	-0.530975	-0.191446		anatomical structure morphogenesis;biological regulation;catabolic process;cell division;cell morphogenesis;cell motility;cellular component assembly;cellular component morphogenesis;cellular component movement;cellular component organization;cellular metabolic process;cellular process;cytoskeleton organization;developmental process;establishment of localization;Golgi vesicle transport;locomotion…	cell part;cytosol;extracellular organelle;macromolecular complex;membrane;nucleoplasm;organelle;protein complex;ubiquitin ligase complex;vesicle	Ubiquitin mediated proteolysis	14.927	14.648	14.7103	14.8898	13.8563	14.1979	14.507	14.511	14.5223	14.582	14.5675	15.1234	14.6235	14.5023	14.8583	14.9251	14.8586	14.4992	14.3498	14.7016	14.4464	15.0493	14.7345	14.6126	14.6223	14.675	15.1594	14.5151	14.4801	NaN	14.8561	14.7956
CUL4A	Q13619	Cullin-4A	0.267597	0.106037	0.0283751		0.833342	-0.29833	-0.248611		0.257665	-0.151269	-0.0389767					13.4291	13.6926	14.0183	13.3409	14.0587	14.2863	14.0752	13.7695	14.1867	14.0255	14.2137	14.2502	13.9241	14.0159	13.553	13.3349	13.7152	12.8757	13.9896	14.499	14.2337	14.1512	13.6788	13.4049	13.7122	14.1688	13.9021	13.348	13.6787	13.4506	14.1792	13.7998
CUL5	Q93034	Cullin-5	1.38314	-0.253222	-0.35024		0.88793	-0.239388	-0.212559		1.16533	-0.27972	-0.325968		biological regulation;cell proliferation;cellular homeostasis;cellular ion homeostasis;cellular metabolic process;cellular process;establishment of localization;homeostatic process;ion transport;macromolecule metabolic process;macromolecule modification;metabolic process;primary metabolic process;protein metabolic process;protein modification by small protein conjugation or removal;protein modifi…	cell part;cytosol;intracellular membrane-bounded organelle;intracellular organelle;macromolecular complex;membrane;nucleus;organelle;plasma membrane;protein complex;ubiquitin ligase complex	Ubiquitin mediated proteolysis	14.9608	14.5493	15.1348	15.1157	15.1885	15.0745	15.1038	14.824	14.9823	14.4358	15.1734	14.7657	14.8838	15.0569	14.6614	14.5994	14.9636	14.7367	15.2126	15.0013	15.437	14.8142	15.1086	15.1328	15.2429	14.5537	14.8489	14.74	15.0125	14.2623	14.9135	14.8129
CUTC	Q9NTM9	Copper homeostasis protein cutC homolog	0.0516449	-0.0382539	-0.00197562		0.507717	-0.739136	-0.375272		0.201197	0.233801	0.04704		biological regulation;cellular component assembly;cellular component organization;cellular process;establishment of localization;homeostatic process;ion transport;macromolecular complex assembly;protein complex assembly;transmembrane transport;transport	cell part;cytoplasm;intracellular membrane-bounded organelle;intracellular non-membrane-bounded organelle;intracellular organelle;nucleolus;nucleoplasm;nucleus;organelle		12.6801	12.8865	11.2701	12.0486	12.7844	12.4723	12.4723	12.8865	12.4362	12.9999	12.6398	13.4195	12.3361	13.158	13.5846	13.4741	12.455	13.2216	12.7959	11.7843	13.6356	NaN	10.7276	13.0598	13.3998	12.8391	NaN	NaN	12.6859	NaN	13.1861	13.0863
CYB5B	O43169	Cytochrome b5 type B	0.197144	-0.360542	-0.0710786		0.979398	1.0361	1.01475		0.342063	0.203843	0.0697272		metabolic process	cell part;membrane		13.9499	14.7658	14.0301	14.5662	14.2334	14.6892	14.77	14.4261	14.3148	14.7394	14.3925	14.8543	14.4394	14.4998	14.3559	14.6725	14.3878	14.9555	13.9337	14.431	14.324	14.2657	13.8443	13.7577	13.7077	NaN	13.3473	14.4957	14.0191	13.4946	13.965	14.2924
CYB5R1	Q9UHQ9	NADH-cytochrome b5 reductase 1	0.875649	0.296954	0.260028		0.504901	0.263447	0.133014		0.0761982	0.0583617	0.00444705		alcohol metabolic process;biosynthetic process;lipid metabolic process;metabolic process;primary metabolic process;small molecule metabolic process	cell part;extracellular organelle;intracellular membrane-bounded organelle;intracellular organelle;membrane;mitochondrion;organelle;vesicle	Amino sugar and nucleotide sugar metabolism	16.5082	16.8499	16.6814	16.6189	16.6764	17.0846	16.7348	16.7061	16.8585	17.0482	17.1363	17.2228	17.2284	17.6593	17.2598	17.6462	18.0025	17.2016	16.6849	17.285	17.0904	17.1212	16.269	16.5637	16.5623	17.0093	15.9828	16.5049	16.417	16.7161	17.07	17.0608
CYB5R3	P00387	NADH-cytochrome b5 reductase 3	0.202152	0.0429042	0.00867319		0.0734991	0.0288754	0.00212231		1.16085	0.255618	0.296735		alcohol metabolic process;biosynthetic process;blood circulation;cellular ketone metabolic process;cellular metabolic process;cellular process;circulatory system process;lipid metabolic process;metabolic process;multicellular organismal process;organic acid metabolic process;primary metabolic process;small molecule metabolic process;vitamin metabolic process	cell part;cytoplasm;endoplasmic reticulum;extracellular organelle;intracellular membrane-bounded organelle;intracellular organelle;lipid particle;macromolecular complex;membrane;mitochondrion;organelle;protein complex;vesicle	Amino sugar and nucleotide sugar metabolism	16.5398	16.4354	16.4313	16.5139	16.4337	16.4679	16.5059	16.4384	16.5253	16.4145	16.3402	17.1161	16.2222	16.2361	16.0794	16.6749	16.5067	16.5855	16.4827	16.6502	16.7064	16.6922	16.3288	16.8638	16.2014	16.3557	16.5081	15.9407	16.5389	16.29	16.4683	16.562
CYC1	P08574	Cytochrome c1, heme protein, mitochondrial	0.500718	0.34082	0.170655		0.388941	0.315836	0.122842		0.330075	-0.251804	-0.0831142		cellular metabolic process;cellular process;generation of precursor metabolites and energy;metabolic process;response to chemical stimulus;response to endogenous stimulus;response to stimulus;small molecule metabolic process	cell part;intracellular membrane-bounded organelle;intracellular organelle;membrane;mitochondrion;nucleus;organelle	Alzheimer's disease;Cardiac muscle contraction;Huntington's disease;Oxidative phosphorylation;Parkinson's disease	17.0393	17.4415	17.192	17.2233	17.3164	17.5439	16.7214	17.154	17.7591	17.5791	17.5024	17.0476	18.4525	18.5787	18.3103	18.5469	18.834	18.2591	17.5212	17.975	17.4646	17.6936	17.1761	17.1559	17.2136	17.5995	16.0172	17.3526	17.3032	16.7095	17.7577	18.0019
CYCS	P99999	Cytochrome c	0.331454	0.240656	0.0797664		0.110529	0.10979	0.0121349		0.174468	-0.183153	-0.0319543		biological regulation;biosynthetic process;catabolic process;cell death;cellular component organization;cellular metabolic process;cellular nitrogen compound metabolic process;cellular process;cellular respiration;death;DNA metabolic process;generation of precursor metabolites and energy;macromolecule metabolic process;metabolic process;mitochondrion organization;nitrogen compound metabolic proce…	cell part;cytosol;intracellular membrane-bounded organelle;intracellular organelle;macromolecular complex;membrane;mitochondrion;nucleus;organelle;protein complex;protein serine/threonine phosphatase complex	Alzheimer's disease;Amyotrophic lateral sclerosis (ALS);Apoptosis;Colorectal cancer;Huntington's disease;ko05152;p53 signaling pathway;Parkinson's disease;Pathways in cancer;Small cell lung cancer;Toxoplasmosis;Viral myocarditis	17.4233	17.4819	17.4386	17.0157	17.4337	17.4574	17.1985	17.6668	18.2078	17.8139	17.5322	17.0859	18.854	18.9509	18.6674	19.0242	19.7043	18.6424	17.6365	18.0981	18.0823	18.1353	17.567	17.6954	17.5428	17.898	16.8515	17.6478	17.7615	17.889	17.942	17.9453
CYRIB	Q9NUQ9	CYFIP-related Rac1 interactor B	0.00680557	-0.00278362	-1.89441e-05		1.30978	-0.446114	-0.584309		0.882948	0.357139	0.315336			cell part;cell projection;cilium;extracellular organelle;organelle;vesicle		13.4586	13.4199	13.3115	13.0943	13.6602	13.2712	13.6725	13.3897	13.7278	13.5466	13.4776	14.0953	12.9847	12.952	13.427	13.3134	12.473	13.4764	13.3803	13.6527	13.3189	12.8288	12.9006	13.4247	13.2706	13.4308	13.3806	12.3005	13.4262	13.3538	13.2196	13.1246
CZIB	Q9NWV4	CXXC motif containing zinc binding protein	0.24372	0.441747	0.107663		0.0372684	0.10049	0.0037451		0.521547	0.592306	0.308915			extracellular organelle;organelle;vesicle		13.7753	14.1466	13.6981	13.6877	13.9633	13.9999	13.4253	14.3388	14.3919	14.3367	14.7726	14.6183	NaN	14.2978	NaN	NaN	NaN	14.796	14.5725	14.5621	14.3188	14.0508	13.1336	14.0721	14.5418	NaN	14.2292	13.9355	13.9906	13.8644	14.0057	14.3839
DAG1	Q14118	Dystroglycan 1	1.05196	0.200159	0.210559		0.132683	0.0420032	0.00557311		1.48757	0.439699	0.654082		anatomical structure morphogenesis;biological adhesion;biological regulation;cell adhesion;cellular component organization;cellular process;cytoskeleton organization;developmental maturation;developmental process;establishment of localization;extracellular matrix organization;extracellular structure organization;interspecies interaction between organisms;locomotion;macromolecule metabolic process…	cell part;cell projection;cytoplasm;cytoskeleton;dystrophin-associated glycoprotein complex;extracellular organelle;extracellular region;extracellular space;filopodium;intracellular non-membrane-bounded organelle;intracellular organelle;macromolecular complex;membrane;nucleoplasm;organelle;plasma membrane;protein complex;vesicle	Arrhythmogenic right ventricular cardiomyopathy (ARVC);Dilated cardiomyopathy;ECM-receptor interaction;Hypertrophic cardiomyopathy (HCM);Viral myocarditis	15.6157	15.6851	15.7808	15.8319	15.5404	15.5169	15.5441	15.7476	15.6203	15.7011	15.3198	16.4859	15.542	15.8697	15.6869	15.9025	15.7282	16.2555	15.7666	15.7553	15.3103	15.5219	15.5693	15.6504	15.6477	15.4914	15.7706	15.7923	15.2754	15.9759	15.4237	16.1917
DAP3	P51398	28S ribosomal protein S29, mitochondrial	0.0145312	0.0122519	0.000178034		0.323764	0.186168	0.0602746		0.221565	-0.150142	-0.0332662		biosynthetic process;cellular component disassembly;cellular component organization;cellular metabolic process;cellular process;macromolecule metabolic process;metabolic process;mitochondrial translation;mitochondrion organization;organelle organization;primary metabolic process;protein metabolic process;translation;translational elongation;translational initiation	cell part;intracellular membrane-bounded organelle;intracellular non-membrane-bounded organelle;intracellular organelle;macromolecular complex;membrane;mitochondrion;nucleolus;nucleoplasm;nucleus;organelle;ribonucleoprotein complex;ribosome;small ribosomal subunit		11.8455	11.3852	11.9089	12.2278	11.339	11.1715	12.0323	12.0554	11.731	11.1667	11.7092	11.5817	12.9135	11.7299	12.2796	12.4942	12.5192	11.7664	11.5078	12.7814	11.6733	12.399	12.0059	12.6825	12.4105	12.3232	11.4027	12.2484	12.3626	NaN	12.0111	12.5192
DARS1	P14868	Aspartate--tRNA ligase, cytoplasmic	0.116694	0.0503351	0.00587378		0.18944	0.0889425	0.0168492		0.174428	-0.0882991	-0.0154018		amine metabolic process;biosynthetic process;cellular amino acid metabolic process;cellular component assembly;cellular component organization;cellular ketone metabolic process;cellular metabolic process;cellular nitrogen compound metabolic process;cellular process;macromolecular complex assembly;macromolecule metabolic process;metabolic process;nitrogen compound metabolic process;nucleobase-cont…	cell part;cytoplasm;cytosol;extracellular organelle;membrane;organelle;vesicle	Aminoacyl-tRNA biosynthesis	15.1232	14.7771	14.0927	14.8496	14.4598	14.9705	14.2904	15.0872	14.4604	14.9197	15.5972	15.1308	14.5285	14.8217	14.4787	14.8607	14.6969	14.6857	14.9101	15.0345	15.2227	14.5774	14.9539	14.3633	15.2756	14.6621	14.7589	14.2451	14.7576	15.116	14.8248	14.872
DBN1	Q16643	Drebrin	0.82561	-0.9756	-0.805464		0.178623	-0.114478	-0.0204483		0.834795	0.61099	0.510052		biological regulation;cell communication;cell proliferation;cellular component organization;cellular process;cytoskeleton organization;organelle organization	cell cortex;cell part;cell projection;cytoplasm;cytoskeleton;intracellular non-membrane-bounded organelle;intracellular organelle;membrane;neuron projection;organelle;plasma membrane		13.0575	13.5667	14.3814	13.6295	14.1315	13.4418	12.049	12.699	13.7584	13.843	NaN	14.5094	13.3229	NaN	14.0259	13.4333	13.6322	13.9694	13.5559	NaN	13.043	13.5719	13.2457	13.2039	13.4716	13.4042	13.9107	13.1886	13.0862	14.0831	13.0682	NaN
DBNL	Q9UJU6	Drebrin-like protein	1.11352	1.4789	1.64679	+	0.783575	1.43738	1.1263	+	0.339799	-1.02373	-0.347864		anatomical structure morphogenesis;biological regulation;cell death;cellular component assembly;cellular component disassembly;cellular component morphogenesis;cellular component organization;cellular membrane organization;cellular metabolic process;cellular process;death;developmental process;endocytosis;establishment of localization;immune system process;macromolecular complex assembly;macromol…	cell cortex;cell part;cell projection;cytoplasm;cytosol;extracellular organelle;intracellular non-membrane-bounded organelle;intracellular organelle;macromolecular complex;membrane;neuron projection;organelle;plasma membrane;protein complex;vesicle		NaN	15.677	NaN	16.2177	14.795	15.2419	15.799	15.6881	16.0253	15.4372	14.6463	15.9048	13.883	14.6465	15.6423	15.0291	15.2079	NaN	15.2678	16.1607	NaN	15.9857	NaN	NaN	NaN	16.0409	15.9475	16.1223	15.7566	NaN	15.5082	15.1251
DBT	P11182	Lipoamide acyltransferase component of branched-chain alpha-keto acid dehydrogenase complex, mitochondrial	0.0933327	0.0789035	0.00736427		0.538076	-0.236184	-0.127085		0.297635	-0.264853	-0.0788294		amine metabolic process;catabolic process;cellular amino acid metabolic process;cellular ketone metabolic process;cellular metabolic process;cellular nitrogen compound metabolic process;cellular process;metabolic process;nitrogen compound metabolic process;organic acid metabolic process;primary metabolic process;small molecule metabolic process	cell part;intracellular membrane-bounded organelle;intracellular non-membrane-bounded organelle;intracellular organelle;macromolecular complex;mitochondrion;organelle;protein complex;tricarboxylic acid cycle enzyme complex	Valine, leucine and isoleucine degradation	12.8953	12.495	13.2757	12.8346	12.3394	13.2991	11.453	12.501	12.4278	12.8162	13.105	13.6955	13.2362	13.3668	12.4258	12.8629	13.6085	12.7737	13.079	13.1319	13.3094	12.9308	12.9799	12.592	13.1841	12.6631	13.1568	12.6388	13.1713	11.2639	12.4873	12.6507
DCAF11	Q8TEB1	DDB1- and CUL4-associated factor 11	0.144708	-0.104912	-0.0151817		0.324142	0.312479	0.101288		0.595819	-0.352677	-0.210132		cellular metabolic process;cellular process;macromolecule metabolic process;macromolecule modification;metabolic process;primary metabolic process;protein metabolic process;protein modification by small protein conjugation or removal;protein modification process	cell part;macromolecular complex;nucleoplasm;protein complex;ubiquitin ligase complex		NaN	10.5088	10.7636	NaN	NaN	NaN	11.6581	NaN	11.5235	10.9046	11.0094	11.4681	11.5185	10.8465	11.1333	11.1608	NaN	NaN	11.2742	NaN	NaN	10.4023	11.8824	10.9246	11.7292	11.152	9.98677	11.6795	11.1198	11.0958	10.8963	11.7187
DCN	P07585	Decorin	0.0399724	-0.0280253	-0.00112024		0.853663	-0.818843	-0.699016		0.387872	0.329564	0.127829		aging;amine metabolic process;anatomical structure development;anatomical structure morphogenesis;biological regulation;biosynthetic process;carbohydrate metabolic process;catabolic process;cellular component disassembly;cellular component organization;cellular metabolic process;cellular process;developmental process;extracellular matrix organization;extracellular structure organization;macromole…	cell part;extracellular region;extracellular space	TGF-beta signaling pathway	17.673	18.1367	19.4182	17.3942	17.7714	18.3363	17.6681	17.8851	19.4547	17.3263	17.4777	19.7374	17.1099	17.5011	17.0989	16.6595	18.163	18.1246	17.9637	17.0618	17.2484	17.1877	18.213	17.4457	17.0127	17.4983	17.718	17.9341	18.0279	17.4868	18.2287	17.405
DCTN1	Q14203	Dynactin subunit 1	0.288412	0.098117	0.0282982		0.576266	-0.670698	-0.3865		0.249188	-0.347358	-0.0865576		anatomical structure development;biological regulation;cell cycle;cellular component movement;cellular component organization;cellular metabolic process;cellular process;cytoskeleton-dependent intracellular transport;developmental process;endosome transport;establishment of localization;immune system process;macromolecule metabolic process;metabolic process;mitosis;mitotic cell cycle;nuclear divi…	cell leading edge;cell part;centrosome;cytoplasm;cytosol;intracellular non-membrane-bounded organelle;intracellular organelle;kinetochore;macromolecular complex;membrane;microtubule organizing center;organelle;protein complex	Huntington's disease;Vasopressin-regulated water reabsorption	14.1609	14.3113	14.3525	14.0201	14.0228	14.387	14.4284	14.3936	14.3476	13.9233	14.4164	14.9431	13.9871	13.7915	14.0904	14.0559	13.8941	13.771	13.8324	14.5348	14.3704	14.385	14.3202	14.259	14.4508	14.2305	14.1226	NaN	14.4425	NaN	14.2267	14.4132
DCTN2	Q13561	Dynactin subunit 2	0.595153	1.28385	0.764086		0.0911087	0.226932	0.0206755		0.379229	0.633643	0.240296		cell cycle;cell proliferation;cellular component organization;cellular process;cytoskeleton organization;establishment of localization;immune system process;mitosis;mitotic cell cycle;nuclear division;organelle fission;organelle organization;transport	cell part;centrosome;cytoplasm;cytosol;extracellular organelle;intracellular non-membrane-bounded organelle;intracellular organelle;kinetochore;macromolecular complex;membrane;microtubule organizing center;organelle;protein complex;site of polarized growth;vesicle	Huntington's disease;Vasopressin-regulated water reabsorption	14.0141	14.8705	NaN	13.5896	NaN	13.4385	NaN	13.762	13.5728	14.1482	14.2657	14.6829	14.1414	14.2936	13.1619	14.7543	14.439	14.67	14.1308	13.3542	14.1103	13.4979	13.0683	14.4157	NaN	14.0068	NaN	12.2444	13.6666	12.1792	14.4518	14.069
DCXR	Q7Z4W1	L-xylulose reductase	0.0517595	0.122422	0.00633651		0.309178	-0.602638	-0.186322		0.132565	0.314353	0.0416721		alcohol metabolic process;carbohydrate metabolic process;cellular component assembly;cellular component organization;cellular metabolic process;cellular nitrogen compound metabolic process;cellular process;cofactor metabolic process;heterocycle metabolic process;macromolecular complex assembly;metabolic process;nitrogen compound metabolic process;nucleobase-containing compound metabolic process;n…	brush border;cell part;cell projection;extracellular organelle;intracellular membrane-bounded organelle;intracellular organelle;macromolecular complex;membrane;microvillus;nucleus;organelle;protein complex;vesicle	Pentose and glucuronate interconversions	13.6935	NaN	NaN	13.2067	NaN	13.3719	13.6981	14.0217	13.9317	14.0133	11.7503	13.953	12.9503	13.3002	NaN	13.9359	13.4782	13.4515	13.323	13.6253	13.9711	14.2842	NaN	14.0351	14.5462	14.4508	13.7838	NaN	14.6311	NaN	NaN	NaN
DDAH1	O94760	N(G),N(G)-dimethylarginine dimethylaminohydrolase 1	0.163829	0.104524	0.017124		0.280505	-0.458544	-0.128624		0.392231	0.176153	0.0690926		amine metabolic process;biological regulation;catabolic process;cellular amino acid metabolic process;cellular ketone metabolic process;cellular metabolic process;cellular nitrogen compound metabolic process;cellular process;metabolic process;nitrogen compound metabolic process;organic acid metabolic process;primary metabolic process;response to stimulus;signal transduction;small molecule metabol…	cell part;extracellular organelle;intracellular membrane-bounded organelle;intracellular organelle;mitochondrion;organelle;vesicle		14.0605	14.4909	14.1075	14.2611	13.8908	14.2795	14.8677	15.0247	15.0537	14.6835	14.9282	14.9433	13.5458	14.5188	13.7375	NaN	14.0607	14.2644	14.9739	14.601	14.495	14.2834	14.6322	14.8774	14.6392	14.624	14.2806	14.9039	14.3243	14.7481	14.7887	14.2437
DDB1	Q16531	DNA damage-binding protein 1	0.472965	0.0692314	0.032744		0.0493679	0.00719611	0.000355256		0.0161045	0.0095094	0.000153145		biological regulation;biosynthetic process;catabolic process;cellular component organization;cellular metabolic process;cellular nitrogen compound metabolic process;cellular process;chromatin modification;chromatin organization;chromosome organization;detection of stimulus;DNA metabolic process;DNA repair;histone modification;homeostatic process;interspecies interaction between organisms;macromol…	cell part;cytoplasm;extracellular organelle;extracellular space;intracellular membrane-bounded organelle;intracellular organelle;macromolecular complex;nucleoplasm;nucleus;organelle;protein complex;ubiquitin ligase complex;vesicle	Nucleotide excision repair;Ubiquitin mediated proteolysis	16.2659	16.2024	16.2023	16.3462	16.0718	16.1673	16.3102	16.2807	16.2048	16.2385	16.2225	16.7768	16.1169	16.0518	16.1028	16.2277	15.9052	16.1914	16.0982	16.4161	16.3981	16.3373	16.3384	16.1964	16.2968	16.3304	16.3624	16.2414	16.0434	15.3191	16.2003	16.4223
DDOST	P39656	Dolichyl-diphosphooligosaccharide--protein glycosyltransferase 48 kDa subunit	0.0421689	-0.025281	-0.00106607		0.183034	0.126357	0.0231276		0.146684	0.154923	0.0227247		biosynthetic process;carbohydrate metabolic process;cell activation;cellular metabolic process;cellular process;establishment of localization;immune system process;macromolecule metabolic process;macromolecule modification;metabolic process;peptidyl-amino acid modification;primary metabolic process;protein glycosylation;protein metabolic process;protein modification process;protein targeting;prot…	cell part;endoplasmic reticulum;intracellular membrane-bounded organelle;intracellular organelle;macromolecular complex;membrane;organelle;protein complex	N-Glycan biosynthesis;Protein processing in endoplasmic reticulum;Various types of N-glycan biosynthesis	13.3432	13.2292	13.3493	13.9494	13.3571	13.7947	13.5515	13.6289	14.1085	13.9853	13.7163	14.3869	13.3337	13.1399	12.717	13.1717	12.9084	13.7624	13.0519	12.7402	13.4223	12.9141	13.69	13.9147	13.646	13.0103	13.7667	13.8803	13.3911	11.6799	12.5785	13.6046
DDRGK1	Q96HY6	DDRGK domain-containing protein 1	0.515988	-0.336121	-0.173434		0.555746	-0.409989	-0.22785		0.0653319	-0.0405436	-0.00264879		biological regulation;cellular process;response to stimulus;response to stress	cell part;endoplasmic reticulum;intracellular membrane-bounded organelle;intracellular organelle;membrane;organelle		12.9104	11.8575	12.7175	12.7662	12.9472	13.038	13.3915	12.1798	13.0196	12.2616	12.5558	13.6111	12.7578	12.1043	11.7658	13.2467	13.0077	12.4158	12.6046	13.0875	13.5965	11.6008	12.697	12.6011	13.1308	13.2148	13.3283	12.3241	13.0025	12.3739	13.2114	13.546
DDX1	Q92499	ATP-dependent RNA helicase DDX1	0.0865978	0.0279984	0.0024246		0.175873	-0.0560273	-0.00985371		0.108302	0.0456618	0.00494528		biological regulation;biosynthetic process;cellular component assembly;cellular component organization;cellular macromolecular complex assembly;cellular metabolic process;cellular nitrogen compound metabolic process;cellular process;developmental process;DNA geometric change;DNA metabolic process;DNA repair;macromolecular complex assembly;macromolecule metabolic process;metabolic process;multicel…	cell part;cytoplasm;intracellular membrane-bounded organelle;intracellular non-membrane-bounded organelle;intracellular organelle;macromolecular complex;membrane;nucleolus;nucleoplasm;nucleus;organelle;protein complex;ribonucleoprotein complex		15.8136	15.7076	15.8898	15.9087	15.4146	15.6052	15.6472	15.8769	15.7432	15.6589	15.7405	16.0952	15.6876	15.7013	15.5011	15.3616	15.5159	15.7569	15.2368	15.429	15.3265	15.4297	15.5766	15.3265	15.642	15.3821	15.8611	15.522	15.3031	15.0569	15.7557	15.8541
DDX17	Q92841	Probable ATP-dependent RNA helicase DDX17	0.253101	-0.186414	-0.0471815		0.104841	0.0422455	0.00442906		1.05806	0.47166	0.499046		biological regulation;biosynthetic process;cellular metabolic process;cellular nitrogen compound metabolic process;cellular process;macromolecule metabolic process;metabolic process;mRNA metabolic process;mRNA processing;nitrogen compound metabolic process;nucleobase-containing compound metabolic process;primary metabolic process;RNA metabolic process;RNA processing;RNA splicing	cell part;cytoplasm;intracellular membrane-bounded organelle;intracellular non-membrane-bounded organelle;intracellular organelle;membrane;nucleolus;nucleoplasm;nucleus;organelle		12.8695	12.3468	12.2961	12.6632	12.5366	12.986	11.3477	12.7032	12.1312	12.7042	12.8897	13.5397	13.1597	12.9553	12.8023	12.5687	12.4318	13.0091	12.9718	12.1419	12.652	12.8027	11.5767	12.7141	12.5733	12.6062	12.7092	12.7773	12.5866	12.9481	13.0866	12.1367
DDX19A	Q9NUU7	ATP-dependent RNA helicase DDX19A	0.185968	0.305974	0.0569014		0.892958	0.73465	0.656012		0.0227947	-0.0525068	-0.00119688		biological regulation;cellular metabolic process;cellular nitrogen compound metabolic process;cellular process;establishment of localization;macromolecule metabolic process;metabolic process;nitrogen compound metabolic process;nuclear transport;nucleobase-containing compound metabolic process;nucleobase-containing compound transport;nucleocytoplasmic transport;primary metabolic process;protein tr…	cell part;cytoplasm;intracellular non-membrane-bounded organelle;intracellular organelle;macromolecular complex;membrane;nuclear pore;nucleolus;organelle;protein complex		NaN	NaN	NaN	14.5268	13.8369	14.1664	13.871	14.1962	13.7657	13.8278	14.1943	14.3248	NaN	13.4336	13.9161	13.8954	13.6383	13.9619	14.0386	12.9658	NaN	14.052	14.0717	13.9022	11.784	NaN	13.4893	13.9098	NaN	NaN	13.3168	13.8437
DDX39B	Q13838	Spliceosome RNA helicase DDX39B	0.166172	-0.0811222	-0.0134802		0.117943	-0.0706477	-0.00833238		0.170241	0.0507968	0.00864768		biological regulation;cellular component assembly;cellular component organization;cellular macromolecular complex assembly;cellular metabolic process;cellular nitrogen compound metabolic process;cellular process;establishment of localization;interspecies interaction between organisms;macromolecular complex assembly;macromolecule metabolic process;metabolic process;mRNA metabolic process;mRNA proc…	cell part;cytoplasm;intracellular membrane-bounded organelle;intracellular non-membrane-bounded organelle;intracellular organelle;macromolecular complex;nucleolus;nucleoplasm;nucleus;organelle;protein complex;ribonucleoprotein complex;spliceosomal complex;transcription export complex	mRNA surveillance pathway;RNA transport;Spliceosome	15.8765	15.9758	15.7396	15.7928	15.6846	15.1344	14.9698	15.5085	14.8897	15.2299	15.4586	15.5247	15.5316	15.4268	15.5922	15.2786	15.1667	15.5092	15.5757	15.5329	15.2972	15.1631	15.5793	15.6566	15.5237	14.8837	15.9877	16.0821	15.3033	15.6948	15.5075	15.1704
DDX3X	O00571	ATP-dependent RNA helicase DDX3X	0.112949	0.0318305	0.00359523		0.0403851	0.0168769	0.000681574		0.136064	-0.0245894	-0.00334574		biological regulation;biosynthetic process;cellular component assembly;cellular component organization;cellular macromolecular complex assembly;cellular metabolic process;cellular nitrogen compound metabolic process;cellular process;chromosome segregation;DNA geometric change;DNA metabolic process;immune system process;macromolecular complex assembly;macromolecule metabolic process;metabolic proc…	cell part;cytoplasm;extracellular organelle;intracellular membrane-bounded organelle;intracellular non-membrane-bounded organelle;intracellular organelle;macromolecular complex;membrane;nucleolus;nucleus;organelle;ribonucleoprotein complex;vesicle	RIG-I-like receptor signaling pathway	15.8952	15.8425	16.2131	16.0986	15.7664	15.6959	15.7316	15.6568	15.7567	15.6724	15.7188	15.6742	15.8868	15.6428	15.519	15.7548	15.461	15.4581	15.306	15.5309	15.5578	15.5112	15.4206	15.4746	15.4541	15.6671	15.4996	15.598	15.5582	15.569	15.5434	15.668
DDX5	P17844	Probable ATP-dependent RNA helicase DDX5	0.890007	-0.845608	-0.752597		0.392652	0.341645	0.134148		0.344421	0.502241	0.172982		biological regulation;biosynthetic process;cell growth;cellular metabolic process;cellular nitrogen compound metabolic process;cellular process;developmental process;embryo development;growth;macromolecule metabolic process;metabolic process;mRNA metabolic process;mRNA processing;nitrogen compound metabolic process;nucleobase-containing compound metabolic process;primary metabolic process;respons…	cell part;cytoplasm;extracellular organelle;intracellular membrane-bounded organelle;intracellular non-membrane-bounded organelle;intracellular organelle;macromolecular complex;membrane;nucleolus;nucleoplasm;nucleus;organelle;ribonucleoprotein complex;spliceosomal complex;vesicle	Spliceosome	NaN	NaN	NaN	NaN	12.4547	13.5136	11.5772	NaN	12.9116	12.8	12.749	12.6475	11.6495	NaN	12.5842	NaN	NaN	13.3392	NaN	NaN	NaN	NaN	12.8349	13.122	NaN	12.0728	12.5874	12.7977	NaN	NaN	13.4265	NaN
DDX6	P26196	Probable ATP-dependent RNA helicase DDX6	0.912158	0.210071	0.191618		0.246662	0.0402713	0.00993339		0.664271	-0.113021	-0.0750766		biological regulation;catabolic process;cellular component assembly;cellular component organization;cellular macromolecular complex assembly;cellular metabolic process;cellular nitrogen compound metabolic process;cellular process;macromolecular complex assembly;macromolecule metabolic process;metabolic process;mRNA metabolic process;nitrogen compound metabolic process;nucleobase-containing compou…	cell part;cytoplasm;cytosol;intracellular membrane-bounded organelle;intracellular non-membrane-bounded organelle;intracellular organelle;macromolecular complex;membrane;nucleolus;organelle;ribonucleoprotein complex;RNAi effector complex	RNA degradation	15.1113	15.0882	15.2213	15.1468	14.9791	15.2527	15.3003	15.2697	15.1034	15.1977	15.0735	14.8944	14.5892	14.9929	14.9026	14.9893	15.064	15.0887	15.0025	15.0475	15.1957	15.2391	15.0906	15.1092	14.5877	15.2206	15.0477	15.2708	15.2473	14.768	14.939	15.1716
DECR1	Q16698	2,4-dienoyl-CoA reductase [(3E)-enoyl-CoA-producing], mitochondrial	0.382342	0.147075	0.0562331		0.280683	0.107606	0.0302032		0.0599012	-0.018041	-0.00108068		catabolic process;cellular component assembly;cellular component organization;cellular ketone metabolic process;cellular lipid metabolic process;cellular metabolic process;cellular process;lipid metabolic process;macromolecular complex assembly;metabolic process;organic acid metabolic process;primary metabolic process;protein complex assembly;small molecule metabolic process	cell part;cytoplasm;extracellular organelle;intracellular membrane-bounded organelle;intracellular organelle;mitochondrion;nucleoplasm;nucleus;organelle;vesicle		17.7806	18.0549	17.9299	17.872	18.1906	17.8866	18.181	18.1495	18.4856	18.6423	18.3088	18.1185	18.5884	18.3557	18.2736	18.6458	18.3762	18.3668	18.0253	18.2757	18.4271	18.269	17.8423	18.1604	17.9065	18.5482	17.9307	18.2161	18.1036	18.0564	18.6506	18.6307
DENR	O43583	Density-regulated protein	0.177161	0.0902901	0.0159959		0.00816609	-0.00440645	-3.59835e-05		0.934744	0.315439	0.294855		cellular component assembly;cellular component disassembly;cellular component organization;cellular macromolecular complex assembly;cellular process;macromolecular complex assembly;ribonucleoprotein complex assembly;translational initiation			14.0471	14.0159	14.0708	13.4417	13.7914	14.2581	14.0388	14.7169	13.6572	13.9114	13.7304	14.4562	13.721	14.128	13.6248	13.6923	13.9809	13.5878	13.7025	13.7259	14.1655	13.3269	13.4625	13.59	14.2352	14.438	13.5188	13.8706	13.3011	14.0022	14.345	13.6066
DEPTOR	Q8TB45	DEP domain-containing mTOR-interacting protein	3.10836	0.945392	2.93862	+	1.26506	0.684119	0.865453		1.25739	0.954787	1.20054	+	biological regulation;cellular component organization;cellular process;regulation of protein modification process;response to stimulus;signal transduction	cell part;intracellular		14.5625	15.0965	14.7734	14.6037	NaN	15.2474	13.5377	15.2346	14.2343	15.4028	14.2114	14.6009	13.5941	14.596	13.3278	14.2126	14.1903	14.6435	14.4568	15.1027	14.1246	14.7111	14.5793	14.7354	14.1883	15.02	14.8598	15.0451	14.5072	14.933	13.9154	14.8775
DERL1	Q9BUN8	Derlin-1	0.194879	-0.35629	-0.0694335		0.032884	0.0752166	0.00247343		0.636193	0.74737	0.475471		biological regulation;catabolic process;cellular metabolic process;cellular process;establishment of localization;interspecies interaction between organisms;macromolecule metabolic process;metabolic process;multi-organism process;primary metabolic process;protein metabolic process;protein transport;proteolysis;proteolysis involved in cellular protein catabolic process;regulation of protein stabil…	cell part;endoplasmic reticulum;endosome;intracellular membrane-bounded organelle;intracellular organelle;macromolecular complex;membrane;organelle;protein complex;ubiquitin ligase complex	Amyotrophic lateral sclerosis (ALS);Protein processing in endoplasmic reticulum	13.2523	12.0087	13.3947	13.4174	13.7384	12.7986	13.0553	13.5949	12.5988	13.3708	11.8835	13.4994	11.9995	12.5422	NaN	12.4648	12.7314	13.1385	12.7979	NaN	NaN	11.1753	NaN	12.8283	11.9604	NaN	NaN	NaN	NaN	NaN	NaN	13.1615
DES	P17661	Desmin	0.0834888	0.0250928	0.00209496		0.0645099	-0.022398	-0.00144489		0.479018	0.122985	0.0589118		biological regulation;cellular component movement;cellular component organization;cellular process;cytoskeleton organization;multicellular organismal process;muscle contraction;organelle organization	cell part;cytosol;extracellular organelle;macromolecular complex;membrane;organelle;plasma membrane;protein complex;synapse;vesicle	Arrhythmogenic right ventricular cardiomyopathy (ARVC);Dilated cardiomyopathy;Hypertrophic cardiomyopathy (HCM)	23.4404	23.559	23.4631	23.4221	23.4451	23.2762	23.3815	23.5189	23.5258	23.6212	23.2117	23.3254	23.1135	23.1034	23.0521	22.9077	22.6842	23.1058	23.2601	23.2471	23.4169	23.4363	23.0736	23.4212	23.0933	22.997	23.3327	23.3234	23.0065	23.036	23.1462	23.1602
DGLUCY	Q7Z3D6	D-glutamate cyclase, mitochondrial	0.1062	0.0760059	0.00807183		0.00868471	0.0288444	0.000250505		0.158046	-0.105882	-0.0167341			cell part;intracellular membrane-bounded organelle;intracellular organelle;mitochondrion;organelle		15.2478	15.8667	NaN	NaN	15.8004	15.4284	15.9269	15.7634	16.0399	15.9853	15.9599	15.8051	16.3784	16.4625	16.2595	16.4875	16.3529	16.0739	15.2346	15.2609	15.5212	15.5662	14.7243	15.3121	15.9183	16.155	15.6575	16.0013	15.9834	15.638	15.5865	15.2401
DHRS7	Q9Y394	Dehydrogenase/reductase SDR family member 7	0.193003	0.102154	0.0197161		0.238567	-0.374629	-0.0893741		0.381426	0.475538	0.181383			cell part;membrane		14.8079	14.9965	14.729	14.8597	14.5647	14.7335	14.5811	14.291	14.6517	14.6623	15.0108	15.8238	14.7931	14.5426	14.5458	14.6599	14.7376	14.2403	14.1417	14.8537	14.0161	15.4003	14.5206	14.0418	13.9784	14.0627	14.7013	NaN	NaN	14.5659	14.0944	14.263
DHRS7B	Q6IAN0	Dehydrogenase/reductase SDR family member 7B	0.368797	-0.258283	-0.0952542		0.131984	0.0737079	0.0097283		0.413314	-0.185391	-0.0766249			cell part;membrane		15.9572	15.6418	15.8604	15.7659	16.0085	15.7107	16.0594	16.0498	15.8684	15.5799	15.9532	15.255	14.8722	15.1669	15.3108	15.1789	14.8878	15.4905	14.881	14.9731	14.7745	15.0634	15.2521	15.2743	15.9896	14.9738	15.1305	15.4436	15.3589	15.0958	15.2382	14.6426
DHRS7C	A6NNS2	Dehydrogenase/reductase SDR family member 7C	0.158369	0.138042	0.0218615		0.639682	-0.423387	-0.270833		0.0303468	-0.0239442	-0.000726631		biological regulation;regulation of transport	cell part;extracellular region;membrane		13.248	13.9546	14.2835	14.0295	14.044	14.1616	14.2269	14.2254	14.416	14.3747	14.1401	13.1369	13.059	12.5877	13.4877	13.2849	12.9468	13.5046	12.9806	13.4959	13.7253	12.569	13.574	13.6978	13.7868	13.7563	13.6369	12.8186	13.141	13.0943	14.1648	14.2745
DHX15	O43143	ATP-dependent RNA helicase DHX15	0.442549	0.342703	0.151663		0.771407	-0.414886	-0.320046		0.0764165	0.0699247	0.0053434		cellular metabolic process;cellular nitrogen compound metabolic process;cellular process;macromolecule metabolic process;metabolic process;mRNA metabolic process;mRNA processing;nitrogen compound metabolic process;nucleobase-containing compound metabolic process;primary metabolic process;RNA metabolic process;RNA processing;RNA splicing	cell part;cytoplasm;intracellular membrane-bounded organelle;intracellular non-membrane-bounded organelle;intracellular organelle;macromolecular complex;nucleolus;nucleoplasm;nucleus;organelle;ribonucleoprotein complex;spliceosomal complex	Spliceosome	11.3504	13.163	12.7767	12.6382	13.0967	12.2257	13.1996	12.6004	13.0991	12.1373	13.1909	13.9711	NaN	13.2206	13.135	13.2312	12.7358	12.286	13.3327	13.4947	14.0043	12.9747	13.2212	13.3256	13.4138	12.7603	13.5426	13.7123	13.1468	14.0908	12.8998	13.1764
DHX9	Q08211	ATP-dependent RNA helicase A	1.14677	0.144986	0.166266		0.0268723	-0.014088	-0.000378576		0.429388	0.153434	0.0658828		biological regulation;cell differentiation;cellular metabolic process;cellular nitrogen compound metabolic process;cellular process;developmental process;DNA geometric change;DNA metabolic process;immune system process;macromolecule metabolic process;metabolic process;mRNA metabolic process;mRNA processing;nitrogen compound metabolic process;nucleobase-containing compound metabolic process;primar…	cell part;centrosome;cytoplasm;cytosol;intracellular membrane-bounded organelle;intracellular non-membrane-bounded organelle;intracellular organelle;macromolecular complex;membrane;microtubule organizing center;nucleolus;nucleoplasm;nucleus;organelle;protein complex;ribonucleoprotein complex		14.8032	14.9904	14.602	15.0084	14.8946	14.6308	14.8006	15.0237	15.2688	15.2869	14.8999	15.7072	15.0219	14.7305	14.8157	15.0489	14.6867	15.0257	14.6979	14.9172	14.972	14.258	14.6902	14.713	14.6831	15.1041	15.1465	14.7256	14.9079	14.8243	14.8459	14.9567
DIP2C	Q9Y2E4	Disco-interacting protein 2 homolog C	0.244616	-0.103556	-0.0253315		0.289696	0.641495	0.185839		0.0756334	-0.137732	-0.0104171			cell part;intracellular membrane-bounded organelle;intracellular organelle;nucleus;organelle		13.1642	12.8974	13.1376	13.5448	13.4106	13.8873	13.7323	13.3044	13.1167	12.8866	13.5088	12.4893	13.5713	13.2274	12.9386	13.5693	13.6413	12.6206	13.0891	13.0598	NaN	13.1377	14.2108	13.6777	13.1089	13.8374	NaN	13.3534	NaN	12.0875	13.2704	12.9884
DKC1	O60832	H/ACA ribonucleoprotein complex subunit DKC1	1.78854	1.41071	2.52311	+	0.434698	-1.00822	-0.438272		0.485453	0.485668	0.235769		biological regulation;biosynthetic process;cell proliferation;cellular component organization;cellular metabolic process;cellular nitrogen compound metabolic process;cellular process;chromosome organization;DNA metabolic process;DNA replication;homeostatic process;macromolecule metabolic process;macromolecule modification;metabolic process;nitrogen compound metabolic process;nucleobase-containing…	cell part;cytoplasm;intracellular membrane-bounded organelle;intracellular non-membrane-bounded organelle;intracellular organelle;macromolecular complex;nucleolus;nucleoplasm;nucleus;organelle;ribonucleoprotein complex;small nucleolar ribonucleoprotein complex;telomerase holoenzyme complex	Ribosome biogenesis in eukaryotes	12.9546	12.4774	19.4149	12.7949	12.8445	13.1587	NaN	12.9345	13.2429	13.022	13.1977	14.4347	12.6853	13.5125	13.1239	13.1277	12.7541	13.0451	NaN	13.3146	12.7179	13.2196	NaN	12.7455	NaN	13.3514	14.0802	13.1005	13.5439	13.4166	NaN	13.0078
DLAT	P10515	Dihydrolipoyllysine-residue acetyltransferase component of pyruvate dehydrogenase complex, mitochondrial	0.187498	0.0731268	0.0137112		0.445345	0.133413	0.0594148		0.273366	-0.083758	-0.0228966		alcohol metabolic process;biological regulation;carbohydrate metabolic process;catabolic process;cellular ketone metabolic process;cellular metabolic process;cellular process;cofactor metabolic process;metabolic process;organic acid metabolic process;primary metabolic process;small molecule metabolic process	cell part;intracellular membrane-bounded organelle;intracellular organelle;macromolecular complex;mitochondrion;organelle;protein complex;pyruvate dehydrogenase complex	Citrate cycle (TCA cycle);Glycolysis / Gluconeogenesis;Pyruvate metabolism	16.2243	16.3795	16.1436	16.2397	16.3963	16.501	16.1937	16.4595	16.3189	16.232	16.4467	15.9563	16.7605	16.7301	16.6771	16.7769	16.4542	16.5725	16.3371	16.6852	16.2729	16.6062	16.3024	16.5294	17.0278	16.6644	16.267	16.6013	16.5705	15.9623	16.7502	16.8137
DLD	P09622	Dihydrolipoyl dehydrogenase, mitochondrial	0.0097389	-0.00348886	-3.39777e-05		0.208289	0.0709467	0.0147774		0.0763151	-0.0215604	-0.00164538		amine metabolic process;anatomical structure morphogenesis;biological regulation;catabolic process;cell maturation;cellular amino acid metabolic process;cellular homeostasis;cellular ion homeostasis;cellular ketone metabolic process;cellular metabolic process;cellular nitrogen compound metabolic process;cellular process;cofactor metabolic process;developmental maturation;developmental process;gen…	cell part;cell projection;cilium;intracellular membrane-bounded organelle;intracellular organelle;mitochondrion;nucleoplasm;organelle	Citrate cycle (TCA cycle);Glycine, serine and threonine metabolism;Glycolysis / Gluconeogenesis;Pyruvate metabolism;Valine, leucine and isoleucine degradation	18.4397	18.5735	18.3118	18.4516	18.5716	18.829	18.4709	18.4809	18.5186	18.4403	18.506	18.4262	18.9371	18.9255	18.89	19.0113	18.8734	18.7425	18.8398	18.8376	18.8989	18.9885	18.6883	18.7463	19.0213	18.8807	18.571	18.7591	18.7654	18.3436	18.7293	18.719
DLST	P36957	Dihydrolipoyllysine-residue succinyltransferase component of 2-oxoglutarate dehydrogenase complex, mitochondrial	0.719255	0.354906	0.255268		0.578688	0.340486	0.197035		0.00218376	0.00187953	4.10444e-06		amine metabolic process;catabolic process;cellular amino acid metabolic process;cellular ketone metabolic process;cellular metabolic process;cellular nitrogen compound metabolic process;cellular process;cofactor metabolic process;generation of precursor metabolites and energy;metabolic process;nitrogen compound metabolic process;organic acid metabolic process;primary metabolic process;small molec…	cell part;extracellular organelle;intracellular membrane-bounded organelle;intracellular organelle;macromolecular complex;membrane;nucleus;organelle;oxoglutarate dehydrogenase complex;protein complex;vesicle	Citrate cycle (TCA cycle);Lysine degradation	16.1315	16.493	15.9117	16.0531	16.1501	16.3173	16.1239	16.36	16.5041	16.5577	16.5219	16.2716	17.334	17.5611	17.2181	17.6941	17.439	17.4375	16.4163	16.9786	16.5315	16.7758	15.8562	16.4851	16.6857	16.9978	16.0309	16.7672	16.7366	16.1918	16.5213	16.9518
DMAC1	Q96GE9	Distal membrane-arm assembly complex protein 1	2.04529	1.45868	2.98341	+	0.0820865	-0.147832	-0.012135		0.0455181	0.0485595	0.00221034			cell part		NaN	NaN	NaN	11.7941	NaN	12.2448	NaN	13.2984	13.1458	13.1978	13.0912	12.7098	12.9227	12.3598	NaN	NaN	12.4379	NaN	NaN	12.8412	12.7239	12.5944	NaN	NaN	NaN	12.4194	12.2235	NaN	NaN	NaN	NaN	12.7433
DMD	P11532	Dystrophin	0.64561	0.0700588	0.0452307		0.146569	0.0245209	0.00359401		2.22135	0.353189	0.784556		anatomical structure development;biological regulation;biosynthetic process;cell development;cellular component assembly;cellular component movement;cellular component organization;cellular homeostasis;cellular localization;cellular macromolecular complex assembly;cellular metabolic process;cellular process;developmental process;extracellular matrix organization;extracellular structure organizati…	cell part;cell projection;cell surface;cytoskeleton;cytosol;dystrophin-associated glycoprotein complex;filopodium;intracellular membrane-bounded organelle;intracellular non-membrane-bounded organelle;intracellular organelle;macromolecular complex;membrane;nucleus;organelle;plasma membrane;protein complex;synapse	Arrhythmogenic right ventricular cardiomyopathy (ARVC);Dilated cardiomyopathy;Hypertrophic cardiomyopathy (HCM);Viral myocarditis	19.5678	19.6796	19.6843	19.7057	19.5705	19.8157	19.7032	19.8277	19.7334	19.8395	19.5233	20.3364	19.5655	19.8103	19.6321	19.7322	19.5298	20.0217	19.6337	19.5194	19.4323	19.5377	19.5888	19.6876	19.6746	19.6408	19.7722	19.6762	19.4908	19.6921	19.5492	19.6365
DMTN	Q08495	Dematin	0.646036	-0.855627	-0.552765		0.160901	-0.205557	-0.0330743		0.112944	0.269661	0.0304566		anatomical structure development;biological regulation;cell development;cellular component assembly;cellular component organization;cellular process;cytoskeleton organization;developmental process;establishment of localization;macromolecular complex assembly;organelle organization;protein complex assembly;protein transport;regulation of organelle organization;regulation of protein modification pr…	cell part;cytoplasmic membrane-bounded vesicle;cytoskeleton;cytosol;endomembrane system;intracellular membrane-bounded organelle;intracellular non-membrane-bounded organelle;intracellular organelle;macromolecular complex;membrane;organelle;plasma membrane;protein complex;vesicle		12.2725	14.0436	12.9357	13.5927	NaN	13.3317	14.4207	13.2945	13.8033	14.0996	13.9367	14.2175	13.4617	NaN	13.9822	14.4642	NaN	NaN	13.5868	13.5052	13.6658	NaN	NaN	NaN	14.0471	11.9689	13.3	14.3852	12.9405	NaN	14.4919	13.9074
DNAJA1	P31689	DnaJ homolog subfamily A member 1	0.578175	0.370177	0.214027		0.218306	-0.136068	-0.0297046		0.230408	-0.225775	-0.0520204		biological regulation;cell motility;cellular component movement;cellular localization;cellular metabolic process;cellular process;detection of stimulus;localization;locomotion;macromolecule metabolic process;metabolic process;multicellular organismal process;primary metabolic process;protein folding;protein metabolic process;regulation of protein modification process;regulation of transport;respo…	cell part;cytosol;extracellular organelle;intracellular membrane-bounded organelle;intracellular organelle;membrane;mitochondrion;nucleus;organelle;vesicle	Protein processing in endoplasmic reticulum	15.0159	14.5008	14.6757	14.1871	14.7361	14.0619	13.5151	14.4303	14.5622	14.2218	14.5888	14.9038	13.3958	14.6851	13.4744	14.3105	14.5454	12.5086	14.6137	15.2355	14.9193	13.9023	13.7268	14.7973	14.5332	14.6884	14.4931	14.4699	14.7242	14.6349	14.9697	14.7244
DNAJA2	O60884	DnaJ homolog subfamily A member 2	0.970115	-0.132855	-0.128884		0.0630605	-0.0207677	-0.00130962		0.200815	-0.0734439	-0.0147486		biological regulation;cellular metabolic process;cellular process;macromolecule metabolic process;metabolic process;primary metabolic process;protein folding;protein metabolic process;response to abiotic stimulus;response to heat;response to stimulus;response to stress	cell part;cytosol;extracellular organelle;membrane;organelle;vesicle	Protein processing in endoplasmic reticulum	16.5072	16.3118	16.5168	16.3789	16.3226	16.3044	16.3612	16.045	16.1137	16.1014	16.2769	16.3038	16.1735	16.2588	16.367	15.917	16.1907	15.5779	16.4648	16.26	16.3764	16.3736	16.4947	16.3212	16.3086	16.2482	15.9155	16.1922	16.3398	16.4231	16.164	16.0583
DNAJA3	Q96EY1	DnaJ homolog subfamily A member 3, mitochondrial	0.484502	0.079936	0.0387292		0.0704228	-0.0117369	-0.000826543		0.703183	-0.121984	-0.0857772		aging;biological regulation;biosynthetic process;cell activation;cell death;cell differentiation;cellular component organization;cellular localization;cellular membrane organization;cellular metabolic process;cellular nitrogen compound metabolic process;cellular process;death;developmental process;DNA metabolic process;DNA replication;immune system process;localization;macromolecule metabolic pro…	cell part;cytoplasm;cytosol;intracellular membrane-bounded organelle;intracellular non-membrane-bounded organelle;intracellular organelle;membrane;mitochondrion;nucleus;organelle;synapse		19.3964	19.3929	19.6352	19.3997	19.5504	19.5263	19.3229	19.4489	19.4573	19.4109	19.3819	19.2381	19.5862	19.7777	19.5223	19.6248	19.8154	19.5939	19.574	19.5152	19.4966	19.4096	19.6382	19.4642	19.4716	19.6803	19.4729	19.6826	19.6359	19.7148	19.6264	19.6423
DNAJA4	Q8WW22	DnaJ homolog subfamily A member 4	0.266665	0.112823	0.0300859		0.993099	0.145478	0.144474		0.597608	-0.181231	-0.108305		biological regulation;cellular metabolic process;cellular process;macromolecule metabolic process;metabolic process;primary metabolic process;protein folding;protein metabolic process;response to abiotic stimulus;response to heat;response to stimulus;response to stress	cell part;cytosol;membrane		15.7355	15.5377	15.5853	15.6746	15.3166	15.1215	15.0007	15.4792	15.3096	15.6535	15.2888	15.5439	15.5349	15.6849	15.3788	15.4946	15.2781	14.6012	15.5317	15.7019	15.3929	15.6536	15.1628	15.0204	14.9933	15.0052	15.4094	15.3654	15.2736	14.7413	15.0709	15.1348
DNAJB11	Q9UBS4	DnaJ homolog subfamily B member 11	0.166051	-0.373723	-0.0620569		0.468875	-0.70232	-0.3293		0.034595	-0.0815225	-0.00282027		biological regulation;cellular metabolic process;cellular nitrogen compound metabolic process;cellular process;macromolecule metabolic process;macromolecule modification;metabolic process;mRNA metabolic process;nitrogen compound metabolic process;nucleobase-containing compound metabolic process;primary metabolic process;protein folding;protein metabolic process;response to chemical stimulus;respo…	cell part;endoplasmic reticulum;intracellular membrane-bounded organelle;intracellular organelle;membrane;nucleus;organelle	Protein processing in endoplasmic reticulum	13.804	13.7448	13.5967	14.4758	14.0674	13.1509	13.3259	NaN	13.7336	14.5648	NaN	14.7418	13.9211	14.049	13.9233	14.0077	13.6134	14.1575	14.4076	NaN	14.4784	NaN	15.0599	14.7689	NaN	14.1838	14.2629	NaN	14.2482	NaN	14.7574	14.4474
DNAJB4	Q9UDY4	DnaJ homolog subfamily B member 4	0.112588	-0.0311909	-0.00351172		0.0285914	0.00700124	0.000200175		0.192203	-0.055439	-0.0106555		cellular metabolic process;cellular process;macromolecule metabolic process;metabolic process;primary metabolic process;protein folding;protein metabolic process;response to abiotic stimulus;response to chemical stimulus;response to heat;response to stimulus;response to stress	cell part;cytoplasm;cytosol;extracellular organelle;membrane;nucleoplasm;organelle;plasma membrane;vesicle		18.0424	17.832	18.0227	17.8039	17.7926	17.7546	17.7976	17.9338	17.9135	17.8769	17.7493	17.2374	17.5591	17.7613	17.6395	17.6501	17.8403	17.505	18.0209	17.9048	18.0305	18.0114	17.6865	17.9224	17.6893	17.7272	17.7233	17.9836	17.7508	17.9599	17.7057	17.4688
DNAJB5	O75953	DnaJ homolog subfamily B member 5	0.368319	0.105186	0.0387419		0.0277842	-0.0117366	-0.000326091		0.0423199	-0.0202734	-0.000857967		biological regulation;cellular metabolic process;cellular process;macromolecule metabolic process;metabolic process;primary metabolic process;protein folding;protein metabolic process;response to chemical stimulus;response to stimulus;response to stress	cell part;cytosol;intracellular membrane-bounded organelle;intracellular organelle;nucleus;organelle		15.791	15.9693	15.991	15.8704	15.729	15.9543	15.4209	15.5342	15.1055	15.4367	15.4214	14.8607	15.8009	15.8261	15.6533	15.5026	15.587	15.646	15.5438	15.5645	15.7539	15.4889	15.6039	15.6048	15.1727	15.4688	15.3581	15.3586	15.2336	15.2815	15.7082	15.7056
DNAJB6	O75190	DnaJ homolog subfamily B member 6	1.62407	0.234369	0.380632		0.339708	0.0413001	0.01403		0.693261	0.134544	0.0932741					15.9999	16.561	16.231	16.5526	16.0397	16.4352	15.9954	16.1637	16.3209	16.3022	16.1343	16.5026	16.2048	16.4706	16.2929	16.2631	16.4842	16.4595	16.3964	16.5006	16.3281	16.3696	16.3345	16.3546	16.3149	16.387	16.4775	16.4176	15.9925	16.2377	16.2344	16.4692
DNAJC11	Q9NVH1	DnaJ homolog subfamily C member 11	0.0590721	0.0350356	0.00206963		0.218583	0.109533	0.0239419		0.32908	-0.149675	-0.049255			cell part;extracellular organelle;membrane;organelle;vesicle		14.144	14.5657	14.5434	14.3371	14.5755	14.4911	15.071	14.9137	15.2736	15.2854	15.2782	15.2363	15.2313	14.8414	14.1863	14.772	14.4172	14.4366	14.8883	15.1394	14.9992	15.0822	14.6444	14.6795	15.4683	15.2498	14.7028	15.0076	14.9027	14.2076	14.6878	14.9911
DNM1L	O00429	Dynamin-1-like protein	0.768488	0.158252	0.121614		1.96604	0.253211	0.497823		1.14461	-0.389424	-0.44574		anatomical structure morphogenesis;biological regulation;cell death;cellular component assembly;cellular component disassembly;cellular component morphogenesis;cellular component organization;cellular localization;cellular macromolecular complex assembly;cellular membrane organization;cellular process;death;developmental process;endocytosis;establishment of localization;localization;macromolecula…	cell part;cytoplasm;cytosol;Golgi apparatus;intracellular membrane-bounded organelle;intracellular organelle;macromolecular complex;membrane;microbody;mitochondrion;organelle;peroxisome;protein complex	Bacterial invasion of epithelial cells;Endocrine and other factor-regulated calcium reabsorption;Endocytosis;Fc gamma R-mediated phagocytosis	14.4983	14.6726	14.3035	14.8006	14.7054	14.746	14.5923	14.7332	14.4452	14.6964	14.7803	14.3004	14.8238	14.7006	14.3874	14.6847	14.7817	14.1435	14.4826	14.7678	14.7095	14.7691	14.4228	14.6315	14.0804	14.5758	14.477	14.6772	14.7417	13.4839	14.5139	14.4909
DNM2	P50570	Dynamin-2	0.474291	-0.186657	-0.0885297		0.125435	0.182477	0.0228889		0.000793826	0.00148487	1.17873e-06					12.8829	13.1574	13.3598	13.7096	13.2784	13.5581	13.7311	13.1271	13.3862	13.0061	13.4008	13.4936	13.135	13.1963	13.9834	NaN	12.8595	NaN	13.5221	13.247	13.2537	13.7584	NaN	13.7582	13.6125	13.6593	NaN	13.326	12.5486	NaN	13.9952	13.3718
DNPEP	Q9ULA0	Aspartyl aminopeptidase	0.76276	-0.340746	-0.259907		0.298206	-0.119893	-0.035753		0.14911	0.0518942	0.00773796		cellular metabolic process;cellular process;metabolic process;peptide metabolic process	cell part;cytoplasm;intracellular membrane-bounded organelle;intracellular organelle;nucleoplasm;nucleus;organelle		14.2404	13.7659	14.113	14.1085	14.0826	14.3011	14.0957	14.2224	13.9657	13.3317	14.1054	13.6493	13.8496	13.1209	13.5255	13.8173	13.5846	13.9409	14.2218	13.8606	13.8963	13.7035	13.7853	14.0584	14.1241	13.4083	13.333	13.3203	14.0686	13.8193	13.1998	13.3089
DPM1	O60762	Dolichol-phosphate mannosyltransferase subunit 1	0.529882	0.637464	0.337781		0.964014	-0.873679	-0.842239		1.29797	1.03105	1.33828	+	alcohol metabolic process;biosynthetic process;carbohydrate metabolic process;cellular lipid metabolic process;cellular metabolic process;cellular nitrogen compound metabolic process;cellular process;lipid metabolic process;macromolecule metabolic process;macromolecule modification;metabolic process;nitrogen compound metabolic process;nucleobase-containing compound metabolic process;nucleotide-su…	cell part;endoplasmic reticulum;intracellular membrane-bounded organelle;intracellular organelle;macromolecular complex;mannosyltransferase complex;membrane;nucleus;organelle;protein complex	N-Glycan biosynthesis	NaN	13.3809	NaN	NaN	NaN	12.8953	12.7191	13.1416	NaN	NaN	NaN	13.16	NaN	NaN	12.5566	NaN	NaN	12.0265	12.2979	12.4461	NaN	NaN	NaN	12.5106	12.2978	12.7508	12.5253	NaN	NaN	NaN	NaN	12.8001
DPP3	Q9NY33	Dipeptidyl peptidase 3	0.0482158	0.0356654	0.00171963		0.307876	-0.391846	-0.12064		0.037187	0.0362132	0.00134666		macromolecule metabolic process;metabolic process;primary metabolic process;protein metabolic process;proteolysis	cell part;cytoplasm;extracellular organelle;membrane;nucleoplasm;organelle;plasma membrane;vesicle		13.1052	12.6192	NaN	13.294	12.3363	12.8724	12.7771	12.6996	12.8949	NaN	13.2106	13.8231	12.3684	12.2681	12.5423	12.4354	12.7745	12.7598	12.8157	12.5238	12.548	12.6249	NaN	12.8209	NaN	12.5994	13.1463	12.8189	13.0909	11.5053	12.7351	12.644
DPT	Q07507	Dermatopontin	0.00436729	-0.00267998	-1.17043e-05		0.554093	-0.319923	-0.177267		0.610675	0.341168	0.208343		biological adhesion;biological regulation;cell adhesion;cellular component organization;cellular process;extracellular matrix organization;extracellular structure organization	extracellular matrix;extracellular organelle;extracellular space;organelle;proteinaceous extracellular matrix;vesicle		15.9923	16.9107	17.1727	16.0649	16.4277	16.3352	16.3643	16.7066	17.1292	16.7098	16.6864	17.8983	16.1566	16.2599	16.093	16.1586	16.0325	16.6636	16.7036	16.1129	16.2096	16.1908	16.9143	16.4643	16.5752	16.7081	17.3657	16.927	16.9073	17.2655	16.9312	16.0089
DPYSL2	Q16555	Dihydropyrimidinase-related protein 2	0.0481918	0.0780787	0.00376275		0.275784	-0.2301	-0.063458		0.169129	-0.326541	-0.0552276		anatomical structure development;biological regulation;cellular component organization;cellular membrane organization;cellular metabolic process;cellular nitrogen compound metabolic process;cellular process;cytoskeleton organization;developmental process;endocytosis;establishment of localization;locomotion;membrane invagination;membrane organization;metabolic process;nitrogen compound metabolic p…	cell body;cell part;cell projection;cytoskeleton;cytosol;extracellular organelle;intracellular membrane-bounded organelle;intracellular non-membrane-bounded organelle;intracellular organelle;macromolecular complex;membrane;mitochondrion;neuron projection;neuronal cell body;organelle;protein complex;site of polarized growth;vesicle	Axon guidance	NaN	12.1628	14.6668	14.2733	14.1238	14.1514	13.7308	14.0522	14.4819	14.0786	13.7934	14.903	14.6413	14.1566	14.6659	12.8298	14.3312	14.1487	14.3603	14.3864	14.3526	14.1702	13.6199	14.106	14.083	14.2493	14.5198	14.6572	13.8006	NaN	14.3626	14.2031
DPYSL3	Q14195	Dihydropyrimidinase-related protein 3	0.279465	0.11219	0.0313531		0.429505	0.128487	0.0551859		0.17661	-0.105075	-0.0185573		biological regulation;cellular component assembly;cellular component organization;cellular process;cytoskeleton organization;locomotion;macromolecular complex assembly;organelle organization;protein complex assembly;response to chemical stimulus;response to external stimulus;response to stimulus;response to stress	cell body;cell part;cell projection;cytoplasmic membrane-bounded vesicle;cytosol;extracellular space;intracellular membrane-bounded organelle;intracellular organelle;macromolecular complex;organelle;protein complex;site of polarized growth;vesicle		16.1829	16.1619	15.6282	16.1269	16.0795	16.274	15.5645	15.7719	15.5865	15.6595	15.6423	15.4614	15.7479	15.7033	15.5185	15.4228	15.5081	15.0141	15.5561	15.6049	15.6536	15.8252	15.163	15.3056	15.4258	15.811	15.4944	15.6384	15.6304	15.1438	15.2501	15.3475
DRG2	P55039	Developmentally-regulated GTP-binding protein 2	0.0301732	0.0622867	0.00187939		0.0499461	0.0990674	0.00494802		0.0857547	0.190343	0.0163228		biological regulation;cellular process;response to stimulus;signal transduction	cell part;cytoplasm;intracellular membrane-bounded organelle;intracellular organelle;membrane;mitochondrion;organelle		12.669	14.1193	13.8487	13.7728	NaN	13.3162	13.4956	NaN	12.8593	NaN	12.3335	13.8703	13.0869	NaN	13.0805	14.2384	NaN	13.187	NaN	NaN	NaN	12.4728	NaN	NaN	NaN	12.9352	13.7188	12.6006	NaN	NaN	NaN	13.0817
DSG1	Q02413	Desmoglein-1	0.551204	0.515206	0.283983		0.579892	0.964462	0.559284		0.284595	-0.547065	-0.155692		biological adhesion;biological regulation;cell adhesion;cell death;cell junction organization;cellular component assembly;cellular component disassembly;cellular component organization;cellular process;death;multicellular organismal process;regulation of protein stability;response to chemical stimulus;response to endogenous stimulus;response to stimulus	cell part;cytosol;extracellular organelle;membrane;organelle;plasma membrane;vesicle	Staphylococcus aureus infection	14.7575	14.684	15.0446	16.0134	15.1992	16.078	15.2937	17.4064	14.3263	15.2365	16.0992	14.3373	14.5702	14.6691	15.2443	16.8535	16.0236	15.9862	15.0884	15.0953	13.2845	14.0317	15.4016	15.7407	14.5335	15.09	16.6493	18.69	14.9477	NaN	15.4271	15.8168
DSP	P15924	Desmoplakin	0.0813612	0.125813	0.0102363		0.816898	0.734087	0.599675		0.630806	-0.901088	-0.568412		anatomical structure development;anatomical structure morphogenesis;cell death;cell differentiation;cell junction organization;cellular component disassembly;cellular component organization;cellular metabolic process;cellular process;cytoskeleton organization;death;developmental process;localization;macromolecule metabolic process;macromolecule modification;metabolic process;organelle organizatio…	cell part;cytoskeleton;extracellular organelle;intracellular membrane-bounded organelle;intracellular non-membrane-bounded organelle;intracellular organelle;macromolecular complex;membrane;mitochondrion;nucleus;organelle;plasma membrane;protein complex;vesicle	Arrhythmogenic right ventricular cardiomyopathy (ARVC)	14.503	14.6519	15.3513	16.3638	15.8933	15.9441	15.4043	17.5106	14.8124	15.6435	16.4263	15.191	15.0806	13.5861	14.8504	15.8785	15.8303	16.3473	15.1958	15.436	15.2656	15.6513	15.4219	15.6055	15.3789	15.1301	17.0126	17.7375	15.5212	NaN	15.9003	15.903
DST	Q03001	Dystonin	0.707443	0.217362	0.153771		0.104286	-0.0399903	-0.00417041		0.166554	-0.112507	-0.0187385		biological adhesion;biological regulation;cell adhesion;cell junction organization;cell motility;cellular component assembly;cellular component movement;cellular component organization;cellular process;cytoskeleton organization;establishment or maintenance of cell polarity;extracellular matrix organization;extracellular structure organization;locomotion;organelle organization;regulation of cell c…	cell cortex;cell leading edge;cell part;cell projection;cytoplasm;cytoplasmic membrane-bounded vesicle;cytoskeleton;cytosol;extracellular organelle;intracellular membrane-bounded organelle;intracellular non-membrane-bounded organelle;intracellular organelle;macromolecular complex;membrane;neuron projection;nuclear envelope;nucleus;organelle;protein complex;vesicle		12.9982	13.2418	12.6177	12.7246	12.4912	12.9885	12.3577	12.9489	13.0855	13.1224	12.5012	13.1061	12.8535	12.7923	12.5084	12.5974	12.9925	12.0656	12.2371	12.7395	13.2011	12.9129	12.6467	12.7433	12.9518	12.7214	13.1351	12.9852	12.4463	NaN	12.4913	12.7499
DTNA	Q9Y4J8	Dystrobrevin alpha	0.499805	0.08404	0.0420036		0.240735	-0.0578388	-0.0139238		0.424791	0.0963004	0.0409076		biological regulation;cell communication;cell-cell signaling;cellular process;multicellular organismal process;muscle contraction;response to stimulus;signal transduction;signaling	cell part;cell projection;cytoplasm;macromolecular complex;membrane;neuron projection;plasma membrane;protein complex;synapse		17.3929	17.1794	17.5578	17.3781	17.4475	17.2691	17.009	17.3815	17.2405	17.2613	17.2833	17.556	17.1212	17.3602	17.102	17.3583	17.2118	17.3149	17.1267	17.0108	17.1591	17.0079	17.0132	17.2262	17.1242	17.1444	17.2745	17.3859	17.1951	17.0178	17.1362	17.3382
DUSP3	P51452	Dual specificity protein phosphatase 3	1.07567	1.10646	1.19019	+	0.380972	0.602676	0.229603		0.876476	-0.524469	-0.459684		biological regulation;cellular metabolic process;cellular process;developmental process;embryo development;immune system process;macromolecule metabolic process;macromolecule modification;metabolic process;phosphorus metabolic process;primary metabolic process;protein dephosphorylation;protein metabolic process;protein modification process;regulation of cell cycle;regulation of mitotic cell cycle…	cell part;cytoplasm;cytosol;extracellular organelle;intracellular membrane-bounded organelle;intracellular organelle;nucleoplasm;nucleus;organelle;vesicle	MAPK signaling pathway	12.9381	13.2332	NaN	13.3486	13.5408	13.5624	12.9171	13.5843	13.4343	13.5784	13.2385	12.8375	NaN	13.5941	13.265	13.2529	12.8047	NaN	13.7144	13.5182	13.0992	NaN	13.4796	12.475	13.5434	13.3323	NaN	13.2196	13.7198	13.2651	NaN	13.7692
DYNC1H1	Q14204	Cytoplasmic dynein 1 heavy chain 1	0.107306	-0.0325085	-0.00348838		0.276175	-0.0965338	-0.0266603		0.216387	0.0959581	0.020764		cell cycle;cellular component assembly;cellular component movement;cellular component organization;cellular macromolecular complex assembly;cellular process;cytoskeleton organization;establishment of localization;immune system process;macromolecular complex assembly;mitotic cell cycle;organelle organization;ribonucleoprotein complex assembly;transport	cell part;cell projection;centrosome;cytosol;extracellular organelle;filopodium;intracellular non-membrane-bounded organelle;intracellular organelle;macromolecular complex;membrane;microtubule organizing center;organelle;protein complex;vesicle	Phagosome;Vasopressin-regulated water reabsorption	14.9777	14.84	15.0064	15.3509	14.9533	15.3141	14.9245	14.6292	14.8599	14.6529	15.0518	15.5399	14.5621	14.783	14.7022	14.917	14.634	14.7358	15.0682	14.993	14.9474	14.8734	14.8085	14.8738	15.127	14.9925	15.4885	14.854	15.064	14.5603	14.5882	14.815
DYNC1I2	Q13409	Cytoplasmic dynein 1 intermediate chain 2	0.540302	-0.428525	-0.231533		0.380338	-0.260998	-0.0992676		0.688372	0.480593	0.330827		cell cycle;cellular component movement;cellular component organization;cellular process;establishment of localization;immune system process;metabolic process;mitotic cell cycle;organelle organization;transport;viral reproduction	cell part;centrosome;cytoplasm;cytosol;intracellular non-membrane-bounded organelle;intracellular organelle;macromolecular complex;microtubule organizing center;organelle;protein complex;vesicle	Phagosome;Vasopressin-regulated water reabsorption	15.6408	14.7672	14.7684	14.4163	14.3823	14.052	14.639	14.636	15.003	14.2969	14.401	15.7295	13.5298	13.5986	14.0505	14.1903	13.9103	14.5516	14.9223	13.8694	15.0463	15.4065	13.9139	15.3069	14.2628	13.7814	14.5421	14.2155	14.9189	14.4075	13.7982	13.5691
DYNC1LI1	Q9Y6G9	Cytoplasmic dynein 1 light intermediate chain 1	0.0996095	0.0659801	0.00657225		0.296037	-0.208058	-0.0615929		0.295332	0.207369	0.0612428		biological regulation;cell division;cellular component movement;cellular component organization;cellular process;establishment of localization;mitosis;nuclear division;organelle fission;organelle organization;regulation of cell cycle;regulation of mitotic cell cycle;transport;viral reproduction	cell part;centrosome;cytoplasm;intracellular non-membrane-bounded organelle;intracellular organelle;kinetochore;macromolecular complex;membrane;microtubule organizing center;organelle;plasma membrane;protein complex	Phagosome;Vasopressin-regulated water reabsorption	12.0904	12.06	12.2455	12.2807	12.5444	12.6965	11.855	12.3395	11.6186	NaN	12.5299	13.2838	12.0238	12.5902	12.5456	12.1289	12.6408	12.0402	12.2272	11.5374	11.958	11.1418	11.8006	13.058	11.615	11.1098	12.6947	12.6712	12.3076	11.6296	11.7452	12.3157
DYSF	O75923	Dysferlin	0.0907324	-0.027669	-0.00251047		0.268842	-0.0616253	-0.0165675		0.702411	0.201441	0.141494		cellular component organization;cellular membrane organization;cellular process;membrane fusion;membrane organization;organelle fusion;organelle organization;plasma membrane organization;vesicle organization	cell part;cell projection;cytoplasmic membrane-bounded vesicle;endosome;extracellular organelle;intracellular membrane-bounded organelle;intracellular organelle;membrane;organelle;plasma membrane;vesicle		16.0662	15.9686	15.9505	16.0384	15.966	16.0908	16.1222	16.2541	16.0665	16.0182	16.1864	16.7767	15.7503	15.6258	15.5348	15.7936	15.7198	15.9846	15.8486	15.7407	16.0919	15.7787	15.9375	16.0843	16.0577	15.8684	15.9927	15.8521	16.0311	15.8518	15.7376	15.9591
ECH1	Q13011	Delta(3,5)-Delta(2,4)-dienoyl-CoA isomerase, mitochondrial	0.0677081	-0.041656	-0.00282045		0.129723	0.0906671	0.0117616		0.053087	0.0215624	0.00114468		catabolic process;cellular ketone metabolic process;cellular lipid metabolic process;cellular metabolic process;cellular process;lipid metabolic process;metabolic process;organic acid metabolic process;primary metabolic process;small molecule metabolic process	cell part;extracellular organelle;intracellular membrane-bounded organelle;intracellular organelle;membrane;microbody;mitochondrion;organelle;peroxisome;vesicle	Peroxisome	15.6866	15.2398	15.1067	15.6243	15.9127	15.5806	15.9641	16.1561	16.2983	16.2263	15.9713	16.1371	16.5714	16.4262	16.392	16.5668	16.3333	16.0135	15.7453	15.7828	16.2313	16.1091	15.9369	16.0562	15.7883	16.0512	15.5984	15.4676	15.4833	16.0403	16.319	16.1687
ECHS1	P30084	Enoyl-CoA hydratase, mitochondrial	0.6908	0.299172	0.206668		0.40142	0.221196	0.0887926		0.0696466	-0.0473083	-0.00329486		catabolic process;cellular ketone metabolic process;cellular lipid metabolic process;cellular metabolic process;cellular process;lipid metabolic process;metabolic process;organic acid metabolic process;primary metabolic process;small molecule metabolic process	cell part;extracellular organelle;intracellular membrane-bounded organelle;intracellular organelle;mitochondrion;organelle;vesicle	Aminobenzoate degradation;Benzoate degradation;beta-Alanine metabolism;Butanoate metabolism;Caprolactam degradation;Fatty acid elongation in mitochondria;Fatty acid metabolism;Lysine degradation;Propanoate metabolism;Tryptophan metabolism;Valine, leucine and isoleucine degradation	16.4686	16.9268	16.6777	16.9138	16.9128	16.8285	16.7472	17.045	17.1233	17.0599	16.9415	16.9498	17.6807	17.7255	17.5841	17.8182	17.7151	17.5269	16.6974	17.0265	16.6898	16.865	16.3443	16.6663	16.6334	17.0862	16.1685	16.7371	16.845	16.319	17.1671	17.3795
ECI1	P42126	Enoyl-CoA delta isomerase 1, mitochondrial	0.836957	0.63195	0.528915		0.130228	-0.217886	-0.028375		0.614723	-0.533941	-0.328226		catabolic process;cellular ketone metabolic process;cellular lipid metabolic process;cellular metabolic process;cellular process;lipid metabolic process;metabolic process;organic acid metabolic process;primary metabolic process;small molecule metabolic process	cell part;extracellular organelle;intracellular membrane-bounded organelle;intracellular organelle;membrane;mitochondrion;organelle;vesicle	Fatty acid metabolism	12.885	12.2617	NaN	12.096	12.5056	12.8356	13.2631	13.3644	14.3174	13.083	13.3375	12.1563	12.8777	13.4239	13.8112	14.0284	13.1237	13.5668	NaN	13.4684	13.1079	NaN	12.5729	12.3177	NaN	12.7686	12.1178	13.1879	12.915	NaN	12.9663	13.2178
ECI2	O75521	Enoyl-CoA delta isomerase 2	0.234295	-0.12617	-0.029561		0.211111	0.141154	0.0297991		0.33655	-0.127657	-0.042963		catabolic process;cellular ketone metabolic process;cellular lipid metabolic process;cellular metabolic process;cellular process;lipid metabolic process;metabolic process;organic acid metabolic process;primary metabolic process;small molecule metabolic process	cell part;intracellular membrane-bounded organelle;intracellular organelle;membrane;mitochondrion;nucleoplasm;organelle	Fatty acid metabolism;Peroxisome	14.1322	14.0735	13.5617	13.7791	14.2601	14.5107	14.7896	14.3542	14.9091	14.7007	14.4472	14.3292	15.2623	15.0501	14.7754	14.97	15.0418	14.5945	14.6774	14.991	14.8223	14.8176	14.513	14.5984	14.6806	14.8231	14.192	14.4727	14.6852	13.8653	15.0573	14.5504
ECM1	Q16610	Extracellular matrix protein 1	0.270091	0.60633	0.163764		0.340694	0.869925	0.296378		0.963618	-1.30668	-1.25914	+	anatomical structure development;anatomical structure formation involved in morphogenesis;biological regulation;cellular process;developmental process;multicellular organismal process;response to stimulus;response to stress;signal transduction	extracellular matrix;extracellular organelle;extracellular space;organelle;proteinaceous extracellular matrix;vesicle		14.4027	NaN	14.412	14.5266	14.1981	14.4533	NaN	15.2119	NaN	14.5599	14.558	NaN	13.5477	13.3984	14.4744	14.4996	14.6012	14.3664	NaN	NaN	NaN	NaN	14.3302	NaN	NaN	13.6987	14.5848	15.9222	14.4488	14.0183	13.9989	14.1431
ECPAS	Q5VYK3	Proteasome adapter and scaffold protein ECM29	0.126721	-0.0999889	-0.0126707		0.325761	0.182687	0.0595123		0.427249	-0.608435	-0.259954		catabolic process;cellular metabolic process;cellular process;macromolecule metabolic process;metabolic process;primary metabolic process;protein metabolic process;proteolysis;proteolysis involved in cellular protein catabolic process	cell part;centrosome;cytoplasmic membrane-bounded vesicle;endoplasmic reticulum;endosome;intracellular membrane-bounded organelle;intracellular non-membrane-bounded organelle;intracellular organelle;macromolecular complex;membrane;microtubule organizing center;nucleus;organelle;proteasome complex;protein complex;vesicle		12.8459	12.3962	12.6701	12.8641	12.8132	12.8952	12.2444	12.6995	12.2568	12.5223	12.5584	13.0775	12.1903	NaN	12.9094	12.0417	10.8328	12.0279	12.7384	12.755	12.0176	12.8291	13.035	NaN	13.2108	12.8277	12.8922	13.4976	12.8332	NaN	12.2226	12.8867
EEF1A1	P68104	Elongation factor 1-alpha 1	1.0027	0.225287	0.225896		0.744266	-0.403466	-0.300286		1.16874	0.776796	0.907874		biological regulation;biosynthetic process;cellular metabolic process;cellular nitrogen compound metabolic process;cellular process;macromolecule metabolic process;metabolic process;nitrogen compound metabolic process;nucleobase-containing compound metabolic process;primary metabolic process;protein metabolic process;response to chemical stimulus;response to endogenous stimulus;response to stimul…	cell part;cytoplasm;cytoskeleton;cytosol;extracellular organelle;extracellular space;intracellular membrane-bounded organelle;intracellular non-membrane-bounded organelle;intracellular organelle;macromolecular complex;membrane;nucleolus;nucleus;organelle;protein complex;vesicle	RNA transport	14.5237	14.6881	15.1867	15.0601	14.8961	14.9312	14.0257	14.5879	15.4758	15.1697	14.8776	16.9024	14.4576	14.7159	14.6553	14.092	14.4559	15.5973	14.5448	14.4431	14.6361	14.7031	14.4528	15.0905	14.7529	14.8329	16.1537	14.8737	14.669	14.3871	14.1522	14.5406
EEF1A2	Q05639	Elongation factor 1-alpha 2	0.369965	-0.0666377	-0.0246536		0.788097	-0.10261	-0.0808666		0.0134823	0.0031894	4.30005e-05		biological regulation;response to chemical stimulus;response to stimulus	cell body;cell part;cytoplasm;macromolecular complex;neuronal cell body;protein complex	RNA transport	19.7136	19.5678	19.7136	19.7831	19.5074	19.8069	19.9205	19.8757	19.7509	19.6179	19.9146	19.9213	19.9595	19.8915	19.8311	19.85	20.0463	19.885	19.9163	19.9286	20.0411	19.8286	19.9212	19.8903	19.7394	19.7233	19.9796	19.8596	19.9388	19.7819	20.0627	19.9252
EEF1B2	P24534	Elongation factor 1-beta	0.66267	-0.19702	-0.130559		0.224988	-0.095657	-0.0215216		0.0823466	-0.0377526	-0.0031088		biosynthetic process;cellular metabolic process;cellular process;macromolecule metabolic process;metabolic process;primary metabolic process;protein metabolic process;translation;translational elongation	cell part;cytoplasm;cytosol;macromolecular complex;protein complex		15.1327	15.2891	14.9696	15.1761	15.5962	15.4037	15.2993	14.9553	15.8657	15.4886	15.7528	15.5219	15.4397	15.1581	15.2781	15.5563	15.2124	15.2275	15.5158	14.8399	15.2612	15.0351	15.1493	15.4757	15.4142	15.4864	15.0814	14.9118	15.2009	14.7073	15.7403	15.6311
EEF1D	P29692	Elongation factor 1-delta	0.352551	0.0850646	0.0299896		0.868939	0.207578	0.180373		0.532403	-0.142358	-0.0757918		biological regulation;biosynthetic process;cellular metabolic process;cellular nitrogen compound metabolic process;cellular process;macromolecule metabolic process;metabolic process;nitrogen compound metabolic process;nucleobase-containing compound metabolic process;primary metabolic process;protein metabolic process;response to abiotic stimulus;response to stimulus;RNA metabolic process;signal t…	cell part;cytoplasm;cytosol;intracellular membrane-bounded organelle;intracellular non-membrane-bounded organelle;intracellular organelle;macromolecular complex;nucleolus;nucleus;organelle;protein complex		16.4129	16.346	16.3373	16.4559	16.3584	16.1037	16.3865	16.3859	16.3761	16.3648	16.7085	16.3341	16.6738	16.7729	16.351	16.6094	16.5538	16.5444	16.3982	16.538	16.1394	16.391	16.3513	16.5366	16.0299	16.4114	15.6349	16.3591	16.3402	15.8889	16.425	16.3824
EEF1G	P26641	Elongation factor 1-gamma	0.0842458	0.0164868	0.00138894		0.192356	-0.0356113	-0.00685005		0.174381	0.0734231	0.0128036		biosynthetic process;cellular metabolic process;cellular process;macromolecule metabolic process;metabolic process;multi-organism process;primary metabolic process;protein metabolic process;response to biotic stimulus;response to stimulus;translation;translational elongation	cell part;cytoplasm;cytosol;extracellular organelle;intracellular membrane-bounded organelle;intracellular organelle;membrane;nucleus;organelle;vesicle		15.4136	15.1831	15.2973	15.3436	15.3038	15.6383	15.1173	15.3756	15.2549	15.0448	15.7703	15.4313	15.4715	15.3828	15.0554	15.1996	15.0311	15.0885	15.1346	15.2053	15.3684	15.1017	14.9732	15.184	15.3516	15.4259	15.3853	15.3905	15.2215	14.9557	15.3083	15.3229
EEF2	P13639	Elongation factor 2	0.0540214	-0.0095911	-0.000518125		0.343221	-0.0388425	-0.0133316		0.331444	-0.0773033	-0.0256217		biological regulation;biosynthetic process;cell differentiation;cellular metabolic process;cellular process;developmental process;macromolecule metabolic process;macromolecule modification;metabolic process;peptidyl-amino acid modification;primary metabolic process;protein metabolic process;protein modification process;regulation of translation;translation;translational elongation	cell part;cytoplasm;cytosol;extracellular organelle;intracellular membrane-bounded organelle;intracellular organelle;macromolecular complex;membrane;nucleus;organelle;plasma membrane;polysome;ribonucleoprotein complex;vesicle		17.5898	17.4182	17.4103	17.5365	17.5934	17.5616	17.6569	17.813	17.6318	17.4837	17.6753	17.7913	17.6305	17.4831	17.4057	17.4291	17.4508	17.4165	17.4726	17.5305	17.6583	17.5598	17.6434	17.5285	17.6218	17.562	17.5516	17.5432	17.5705	17.0854	17.4966	17.6037
EFEMP1	Q12805	EGF-containing fibulin-like extracellular matrix protein 1	0.0226501	-0.0391223	-0.000886125		1.28206	-1.14691	-1.47041	+	0.266976	-0.421089	-0.112421		biological regulation;cellular component organization;cellular metabolic process;cellular process;extracellular matrix organization;extracellular structure organization;macromolecule metabolic process;macromolecule modification;metabolic process;multicellular organismal process;neurological system process;peptidyl-amino acid modification;phosphorus metabolic process;primary metabolic process;prot…	extracellular matrix;extracellular organelle;extracellular region;extracellular space;organelle;proteinaceous extracellular matrix;vesicle		NaN	13.5417	12.9985	12.9912	13.4008	12.1728	12.9235	NaN	12.8673	NaN	NaN	13.6587	NaN	11.6312	12.806	NaN	NaN	12.2819	11.6819	NaN	13.0879	12.2734	13.4659	12.4372	12.7467	12.0732	13.1876	13.5134	13.4099	NaN	NaN	NaN
EFTUD2	Q15029	116 kDa U5 small nuclear ribonucleoprotein component	0.0734651	-0.0281479	-0.00206789		0.092881	-0.0480202	-0.00446016		0.363532	-0.41474	-0.150771		cellular metabolic process;cellular nitrogen compound metabolic process;cellular process;macromolecule metabolic process;metabolic process;mRNA metabolic process;mRNA processing;nitrogen compound metabolic process;nucleobase-containing compound metabolic process;primary metabolic process;RNA metabolic process;RNA processing;RNA splicing	cell part;cytoplasm;macromolecular complex;membrane;nucleoplasm;ribonucleoprotein complex;spliceosomal complex	Spliceosome	13.7566	13.1571	13.6435	13.5423	13.7495	13.8926	13.42	13.7859	13.4241	13.6945	13.7607	14.0126	13.1196	13.4553	13.2103	13.1672	12.9624	12.812	13.7844	13.6412	13.5729	13.7163	13.4661	13.7275	13.3122	13.4267	14.3638	13.9292	13.9031	NaN	13.6315	13.3893
EHBP1L1	Q8N3D4	EH domain-binding protein 1-like protein 1	0.0287305	0.0223138	0.000641086		0.458843	-0.228789	-0.104978		0.00723852	0.0105435	7.63193e-05			cell part;membrane		11.506	11.8181	12.1756	11.8842	11.9751	11.8793	11.7487	11.8733	11.8227	11.8714	11.7373	12.3261	NaN	11.4888	11.5878	12.3074	NaN	11.9918	12.1325	10.7947	12.1729	11.3753	9.99122	11.959	12.0247	12.3845	11.8635	10.8179	12.0054	NaN	11.3115	12.3207
EHD2	Q9NZN4	EH domain-containing protein 2	0.131742	0.0337499	0.00444628		0.19178	-0.0516806	-0.00991127		0.197454	0.0602306	0.0118928		biological regulation;cellular component organization;cellular localization;cellular membrane organization;cellular process;coagulation;cytoskeleton organization;endocytosis;endosome transport;establishment of localization;localization;membrane invagination;membrane organization;multicellular organismal process;organelle organization;plasma membrane organization;regulation of body fluid levels;tr…	cell part;extracellular organelle;intracellular membrane-bounded organelle;intracellular organelle;membrane;nucleus;organelle;plasma membrane;vesicle	Endocytosis	16.3283	16.3123	16.5253	16.132	16.3122	16.6863	16.3992	16.4667	16.5099	16.5646	16.5589	16.6124	16.8095	16.7855	16.5574	16.4716	16.8843	16.5273	16.49	16.6358	16.3868	16.6084	16.1413	16.4066	16.5776	16.6313	16.8051	16.7412	16.6618	16.3827	16.4556	16.4311
EIF2A	Q9BY44	Eukaryotic translation initiation factor 2A	0.639068	-0.427694	-0.273326		0.844708	-0.371871	-0.314123		0.653252	-0.72384	-0.47285		biological regulation;cellular component assembly;cellular component organization;cellular macromolecular complex assembly;cellular metabolic process;cellular process;macromolecular complex assembly;macromolecule metabolic process;macromolecule modification;metabolic process;organelle assembly;phosphorus metabolic process;primary metabolic process;protein metabolic process;protein modification pr…	cell part;cytoplasm;extracellular space;macromolecular complex;protein complex		12.4858	12.5633	12.718	12.2065	12.6784	12.2265	12.8289	12.6203	12.9516	13.0279	13.1815	12.9357	12.9749	12.7958	12.2244	12.3199	12.7489	12.8921	13.6373	13.028	13.4652	12.9392	13.652	13.1099	12.8732	13.2575	13.405	12.5847	13.2027	NaN	13.2446	NaN
EIF2B4	Q9UI10	Translation initiation factor eIF-2B subunit delta	0.237447	0.235083	0.0558198		0.675203	-0.56199	-0.379458		0.102753	0.136253	0.0140003		anatomical structure development;biological regulation;biosynthetic process;cell development;cellular metabolic process;cellular process;developmental process;macromolecule metabolic process;metabolic process;primary metabolic process;protein metabolic process;regulation of translation;response to abiotic stimulus;response to chemical stimulus;response to endogenous stimulus;response to heat;resp…	cell part;cytoplasm;cytosol;macromolecular complex;protein complex	RNA transport	11.5508	12.522	12.2823	11.7291	11.7586	12.7964	12.0965	12.8566	12.5583	12.5236	13.4476	13.0994	12.8851	12.7624	NaN	11.5061	12.6772	11.2394	10.6735	11.9685	12.9407	NaN	12.0631	12.1481	12.1468	12.0357	12.6717	12.1835	NaN	11.9785	13.0938	11.7118
EIF2S1	P05198	Eukaryotic translation initiation factor 2 subunit 1	0.204675	0.0577599	0.011822		0.47379	0.102599	0.0486104		0.041791	0.0223306	0.000933218		biological regulation;biosynthetic process;cellular metabolic process;cellular process;establishment of localization;macromolecule metabolic process;macromolecule modification;metabolic process;phosphorus metabolic process;primary metabolic process;protein metabolic process;protein modification process;protein phosphorylation;regulation of translation;response to chemical stimulus;response to sti…	cell part;cytosol;extracellular organelle;intracellular membrane-bounded organelle;intracellular non-membrane-bounded organelle;intracellular organelle;macromolecular complex;membrane;nucleus;organelle;polysome;protein complex;ribonucleoprotein complex;ribosome;vesicle	Hepatitis C;Measles;Protein processing in endoplasmic reticulum;RNA transport	15.2017	15.6275	15.0423	15.3391	15.4932	15.7038	15.5076	15.3049	15.4903	15.4524	16.2715	15.7924	15.3607	15.8225	15.1287	15.6062	15.0712	15.2875	15.5587	15.4455	15.4602	15.1827	15.5534	15.523	15.7712	15.7163	15.4516	15.4724	15.2956	15.4549	15.5685	15.3984
EIF2S3	P41091	Eukaryotic translation initiation factor 2 subunit 3	0.0689077	-0.0376051	-0.00259128		0.826611	-0.820264	-0.67804		0.141622	0.0710068	0.0100561		biosynthetic process;cellular metabolic process;cellular process;establishment of localization;macromolecule metabolic process;metabolic process;primary metabolic process;protein metabolic process;translation;translational initiation;transmembrane transport;transport	cell part;cytoplasm;cytosol;extracellular organelle;organelle;vesicle	RNA transport	13.4944	13.8782	13.8976	13.7181	13.8588	14.4122	14.4643	14.142	14.0174	14.1651	14.914	14.5324	14.4782	14.6544	14.0358	13.3935	14.0238	14.4232	14.4025	13.9051	14.2792	13.3896	13.9405	13.8505	13.9757	14.2936	13.7776	NaN	14.2593	13.9964	14.3716	14.0878
EIF3A	Q14152	Eukaryotic translation initiation factor 3 subunit A	0.378423	-0.0980671	-0.0371108		0.429039	-0.217563	-0.093343		0.303011	-0.261107	-0.0791181		biological regulation;biosynthetic process;cellular component assembly;cellular component organization;cellular macromolecular complex assembly;cellular metabolic process;cellular process;macromolecular complex assembly;macromolecule metabolic process;metabolic process;primary metabolic process;protein metabolic process;regulation of translation;ribonucleoprotein complex assembly;translation;tran…	cell part;cytoplasm;cytosol;intracellular membrane-bounded organelle;intracellular non-membrane-bounded organelle;intracellular organelle;macromolecular complex;membrane;nucleolus;nucleus;organelle;protein complex;ribonucleoprotein complex	RNA transport	13.7677	13.8743	14.0932	13.6939	13.5803	13.9407	14.4379	14.0353	13.835	12.8407	13.9469	14.6272	14.1052	14.1883	13.7785	13.9186	14.3097	13.7677	14.2067	14.1411	14.1067	13.6629	13.8806	12.854	14.4075	13.9757	14.3616	14.2287	13.4999	12.2795	14.1562	14.2782
EIF3B	P55884	Eukaryotic translation initiation factor 3 subunit B	0.0519947	0.129789	0.00674834		1.36084	0.382318	0.520274		0.00804354	0.0239065	0.000192293		biological regulation;biosynthetic process;cellular component assembly;cellular component organization;cellular macromolecular complex assembly;cellular metabolic process;cellular process;macromolecular complex assembly;macromolecule metabolic process;metabolic process;primary metabolic process;protein metabolic process;regulation of translation;ribonucleoprotein complex assembly;translation;tran…	cell part;cytoplasm;cytosol;extracellular organelle;macromolecular complex;nucleoplasm;organelle;protein complex;ribonucleoprotein complex;vesicle	RNA transport	13.6668	14.5454	14.5372	14.365	15.0679	14.8926	14.9089	14.7033	14.2274	14.645	14.3545	15.1618	NaN	NaN	14.6711	14.9473	15.3533	14.3796	14.3283	15.1796	14.5486	14.9472	14.2643	14.6729	14.8931	14.7608	14.6052	15.0843	14.5546	NaN	14.509	14.9378
EIF3C	Q99613	Eukaryotic translation initiation factor 3 subunit C	0.285684	0.443235	0.126625		0.0223178	0.0492516	0.00109919		0.439136	-0.749885	-0.329301					14.6664	14.0985	NaN	14.5187	14.2328	14.0344	NaN	13.788	NaN	13.7362	13.1091	14.9539	14.2668	14.4469	14.1524	13.1967	14.3583	14.352	14.7013	13.8654	13.3007	NaN	14.71	13.7119	13.4707	14.1069	13.2255	14.0022	14.7375	NaN	14.2851	14.2513
EIF3D	O15371	Eukaryotic translation initiation factor 3 subunit D	0.43817	-0.142513	-0.062445		0.048192	0.0290605	0.00140049		0.240547	-0.179187	-0.0431028		biological regulation;biosynthetic process;cellular component assembly;cellular component organization;cellular macromolecular complex assembly;cellular metabolic process;cellular process;macromolecular complex assembly;macromolecule metabolic process;metabolic process;primary metabolic process;protein metabolic process;regulation of translation;ribonucleoprotein complex assembly;translation;tran…	cell part;cytosol;macromolecular complex;membrane;protein complex;ribonucleoprotein complex	RNA transport	13.7717	12.925	12.6173	13.2165	13.0985	13.4929	13.7639	13.777	13.681	13.5741	13.6408	14.3716	13.3775	13.3472	13.2451	12.7035	13.2335	12.9228	13.4639	13.2739	12.9579	13.3123	14.0371	12.9704	13.3453	13.3741	13.7362	13.2891	13.2426	13.3811	13.146	13.3159
EIF3E	P60228	Eukaryotic translation initiation factor 3 subunit E	0.298615	-0.0898248	-0.0268231		0.310488	0.147779	0.0458835		0.00142663	0.00100915	1.43968e-06		biological regulation;biosynthetic process;catabolic process;cellular component assembly;cellular component organization;cellular macromolecular complex assembly;cellular metabolic process;cellular nitrogen compound metabolic process;cellular process;macromolecular complex assembly;macromolecule metabolic process;metabolic process;mRNA metabolic process;nitrogen compound metabolic process;nucleob…	cell part;cytoplasm;cytosol;extracellular organelle;intracellular membrane-bounded organelle;intracellular organelle;macromolecular complex;membrane;nucleoplasm;nucleus;organelle;protein complex;ribonucleoprotein complex;vesicle	Hepatitis C;RNA transport	13.1912	12.9836	12.2636	12.7623	12.4841	12.8394	12.9743	13.1883	12.9726	13.2173	13.3772	13.6211	13.1602	12.5185	12.8273	13.3305	12.8816	12.9382	12.7157	13.0802	13.0937	12.7713	12.4997	12.5185	12.9794	13.1191	13.0664	12.4537	12.5451	12.2853	13.1157	12.708
EIF3G	O75821	Eukaryotic translation initiation factor 3 subunit G	0.00600953	0.00409905	2.46334e-05		0.88885	0.395487	0.351528		0.038773	0.0381565	0.00147944		biological regulation;biosynthetic process;cellular component assembly;cellular component organization;cellular macromolecular complex assembly;cellular metabolic process;cellular process;macromolecular complex assembly;macromolecule metabolic process;metabolic process;primary metabolic process;protein metabolic process;regulation of translation;ribonucleoprotein complex assembly;translation;tran…	cell part;cytoplasm;cytosol;macromolecular complex;protein complex;ribonucleoprotein complex	RNA transport	13.487	13.5728	13.6744	13.6754	13.2657	14.2583	14.1815	13.9892	14.0039	13.6486	13.4347	14.6033	13.4831	13.3036	13.2778	14.7292	14.6775	13.6581	14.0756	14.2001	13.4926	14.143	14.2469	14.2092	14.4467	14.4148	14.1955	14.6499	13.4792	12.8623	13.709	13.927
EIF3H	O15372	Eukaryotic translation initiation factor 3 subunit H	0.724006	0.655519	0.474599		0.203393	0.148268	0.0301566		0.108832	0.130028	0.0141512		biological regulation;biosynthetic process;cellular component assembly;cellular component organization;cellular macromolecular complex assembly;cellular metabolic process;cellular process;macromolecular complex assembly;macromolecule metabolic process;metabolic process;primary metabolic process;protein metabolic process;regulation of translation;ribonucleoprotein complex assembly;translation;tran…	cell part;cytosol;extracellular organelle;macromolecular complex;membrane;organelle;protein complex;ribonucleoprotein complex;vesicle	Measles;RNA transport	10.8301	11.1057	NaN	11.4045	10.8944	10.0213	NaN	NaN	11.0802	11.2737	11.3278	11.6556	NaN	NaN	NaN	NaN	9.23806	NaN	NaN	10.6361	10.5604	NaN	NaN	9.48332	10.9077	9.30517	NaN	NaN	10.982	10.5195	NaN	NaN
EIF3J	O75822	Eukaryotic translation initiation factor 3 subunit J	0.337958	0.0733185	0.0247785		0.689857	-0.776677	-0.535796		0.442778	-0.662916	-0.293525		biological regulation;biosynthetic process;cellular component assembly;cellular component organization;cellular macromolecular complex assembly;cellular metabolic process;cellular process;cytoplasmic translation;macromolecular complex assembly;macromolecule metabolic process;metabolic process;primary metabolic process;protein metabolic process;regulation of translation;ribonucleoprotein complex a…	cell part;cytosol;macromolecular complex;protein complex;ribonucleoprotein complex	RNA transport	14.4672	14.2937	14.3536	14.4052	14.3772	NaN	14.5168	14.6018	14.8315	14.6154	14.6898	14.8666	14.4204	14.5517	14.7353	NaN	13.925	14.7933	14.6445	14.5443	14.548	14.7073	14.9841	14.7751	14.4307	14.9476	14.9363	14.5675	14.6741	14.6646	14.6446	14.625
EIF3L	Q9Y262	Eukaryotic translation initiation factor 3 subunit L	1.4765	-0.361063	-0.533108		0.0651644	-0.0187494	-0.00122179		0.0468858	-0.0485123	-0.00227454		biological regulation;cellular component assembly;cellular component organization;cellular macromolecular complex assembly;cellular process;macromolecular complex assembly;regulation of translation;ribonucleoprotein complex assembly;translational initiation	cell part;macromolecular complex;membrane;nucleoplasm;protein complex;ribonucleoprotein complex		13.0221	12.9726	12.6299	12.9949	13.0197	13.571	13.4841	12.9573	12.6164	12.485	13.4995	13.6908	13.2022	12.9764	12.9126	12.9936	12.7956	12.9064	12.8687	12.4755	12.9121	12.8811	12.8321	NaN	13.5494	12.6296	12.8687	12.5819	12.2857	NaN	13.1621	13.1107
EIF4A2	Q14240	Eukaryotic initiation factor 4A-II	0.0181327	-0.00983779	-0.000178386		0.15282	0.0757128	0.0115704		0.467434	0.257921	0.120561					14.529	14.7891	13.5967	14.3906	14.3961	14.325	14.8175	15.0581	14.4105	14.7705	15.0218	14.8987	14.7234	14.19	14.8015	14.128	13.7898	15.0468	14.9093	14.9332	14.4477	14.5361	13.811	14.28	14.3079	14.1674	14.2684	14.0704	14.1294	13.8622	14.3471	14.4376
EIF4A3	P38919	Eukaryotic initiation factor 4A-III	0.7234	0.133683	0.0967063		0.278957	0.0791607	0.0220824		0.0830466	0.0371904	0.00308854		anatomical structure morphogenesis;biological regulation;catabolic process;cellular metabolic process;cellular nitrogen compound metabolic process;cellular process;developmental process;establishment of localization;macromolecule metabolic process;metabolic process;mRNA metabolic process;mRNA processing;nitrogen compound metabolic process;nucleobase-containing compound metabolic process;nucleobas…	cell part;cytoplasm;cytosol;intracellular non-membrane-bounded organelle;intracellular organelle;macromolecular complex;membrane;nucleolus;nucleoplasm;organelle;protein complex;ribonucleoprotein complex;spliceosomal complex	mRNA surveillance pathway;RNA transport;Spliceosome	16.4524	16.4633	16.3272	16.6267	16.4389	16.2295	16.3816	16.8897	16.4704	16.5705	16.3627	16.9088	16.5226	16.5937	16.4517	16.0762	16.4646	16.6319	16.4282	16.3954	16.0259	16.3993	16.1538	16.2623	16.1404	16.4165	16.5766	16.6962	16.2797	15.7821	16.5178	16.4865
EIF4B	P23588	Eukaryotic translation initiation factor 4B	0.447633	0.480544	0.215108		1.08482	0.373715	0.405415		0.424627	-0.569368	-0.241769		biological regulation;biosynthetic process;catabolic process;cellular metabolic process;cellular nitrogen compound metabolic process;cellular process;macromolecule metabolic process;metabolic process;mRNA metabolic process;mRNA processing;nitrogen compound metabolic process;nucleobase-containing compound metabolic process;primary metabolic process;protein metabolic process;regulation of translati…	cell part;cytosol;macromolecular complex;protein complex	mTOR signaling pathway;RNA transport	NaN	NaN	11.7227	12.1121	12.2436	11.757	12.6051	12.7068	12.2955	12.4718	12.066	13.0972	11.9442	11.7244	12.0522	13.1355	12.2233	12.2646	NaN	12.1171	12.1798	12.6291	12.8419	11.8859	12.3229	13.1277	12.7346	12.4779	12.5908	NaN	12.0972	12.6188
EIF4G1	Q04637	Eukaryotic translation initiation factor 4 gamma 1	0.0734005	0.0319403	0.00234443		0.27476	0.0803806	0.0220854		0.205606	0.0711834	0.0146357		biological regulation;biosynthetic process;catabolic process;cellular metabolic process;cellular nitrogen compound metabolic process;cellular process;macromolecule metabolic process;metabolic process;mRNA metabolic process;mRNA processing;nitrogen compound metabolic process;nucleobase-containing compound metabolic process;primary metabolic process;protein metabolic process;regulation of translati…	cell part;cytosol;macromolecular complex;membrane;protein complex	RNA transport;Viral myocarditis	14.8776	14.5531	14.7101	14.8141	14.5713	15.0407	14.7521	14.8563	14.7568	14.6802	14.9478	15.0175	14.0738	14.5153	14.533	14.8802	14.6502	14.35	14.9531	14.8754	14.7144	15.1319	14.9268	14.515	14.9027	14.568	14.4663	14.348	14.6994	15.0404	14.3769	14.7597
EIF4G2	P78344	Eukaryotic translation initiation factor 4 gamma 2	0.126888	0.0586548	0.00744258		0.904609	0.198688	0.179735		1.2948	0.381603	0.494101		biological regulation;cell death;cellular process;death;regulation of cell cycle;regulation of translation;response to chemical stimulus;response to stimulus;signal transduction	cell part;cytosol;macromolecular complex;membrane;protein complex	RNA transport;Viral myocarditis	13.1236	12.5129	12.679	13.205	12.0634	13.1301	12.7682	13.2045	12.7791	13.3139	12.8128	13.4917	13.1294	12.8873	13.0783	13.2365	12.8319	13.0483	12.9523	13.4912	13.0727	13.0542	12.9466	12.9861	13.2028	13.3103	13.3884	13.0472	12.918	13.1675	13.3554	13.4775
EIF4H	Q15056	Eukaryotic translation initiation factor 4H	1.0674	0.210044	0.224202		0.0276944	0.0120258	0.000333048		0.788699	0.210248	0.165822		biological regulation;biosynthetic process;cellular metabolic process;cellular process;developmental process;growth;macromolecule metabolic process;metabolic process;primary metabolic process;protein metabolic process;regulation of translation;reproduction;translation;translational initiation;viral reproduction	cell part;cytosol;macromolecular complex;membrane;protein complex		16.2623	16.4871	16.0535	16.1339	16.3302	16.2538	15.84	16.299	16.144	15.8782	15.8248	16.295	15.9763	16.1813	15.6302	15.9446	15.6125	16.1995	16.1164	15.9795	15.7136	15.4951	15.9417	16.1554	15.8395	16.1547	16.0356	16.28	15.7625	15.658	15.7866	15.9796
EIF5	P55010	Eukaryotic translation initiation factor 5	0.267005	0.107844	0.0287949		0.545076	0.188134	0.102547		0.117186	-0.0680564	-0.00797528		biological regulation;biosynthetic process;cellular metabolic process;cellular process;macromolecule metabolic process;metabolic process;primary metabolic process;protein metabolic process;regulation of translation;translation;translational initiation	cell part;cytoplasm;cytosol;membrane;plasma membrane	RNA transport	14.1692	14.1971	13.8244	13.8812	13.8642	14.0843	13.5774	13.8423	13.6452	13.5883	14.2516	13.3454	13.6711	13.8784	13.338	13.7109	14.1305	13.4326	13.5792	13.9671	13.9602	13.8207	13.6352	13.9414	13.9251	13.3395	13.0594	14.1522	14.0071	14.011	13.3182	13.6628
EIF5A	P63241	Eukaryotic translation initiation factor 5A-1	0.368173	-0.173169	-0.0637562		0.318755	0.186569	0.0594696		0.435642	0.183756	0.0800517					15.8033	15.4613	15.4468	15.4126	15.8334	15.556	15.6193	15.6936	15.8803	15.5059	15.2547	16.1663	15.686	15.5854	15.637	15.5561	15.6781	15.159	15.8491	14.5604	15.8633	15.8666	15.7345	16.1228	15.4988	15.7117	14.2763	15.6564	15.684	15.6127	15.0831	15.4881
EIF5B	O60841	Eukaryotic translation initiation factor 5B	0.55105	0.609243	0.335724		0.216819	-0.115406	-0.0250221		0.426704	-0.33874	-0.144542		biological regulation;biosynthetic process;cellular metabolic process;cellular process;macromolecule metabolic process;metabolic process;primary metabolic process;protein metabolic process;regulation of translation;translation;translational initiation	cell part;cytoplasm;cytosol	RNA transport	13.5143	14.0448	13.8429	13.6325	13.6555	13.7413	13.9535	13.3414	13.3867	13.8583	13.8722	13.9953	13.9197	14.2542	13.0232	13.5013	13.3904	13.1613	13.6735	14.0151	13.8479	13.7651	13.9884	13.8579	NaN	14.0907	14.4832	13.2889	14.2119	11.8314	13.9963	13.7067
ELANE	P08246	Neutrophil elastase	0.478695	0.585474	0.280263		0.0965708	-0.161542	-0.0156002		0.681522	0.972047	0.662472		biological regulation;catabolic process;cell killing;cell motility;cellular component disassembly;cellular component movement;cellular component organization;cellular homeostasis;cellular ion homeostasis;cellular membrane organization;cellular process;endocytosis;establishment of localization;extracellular matrix organization;extracellular structure organization;homeostatic process;immune system …	cell part;cell surface;cytoplasm;cytoplasmic membrane-bounded vesicle;extracellular organelle;extracellular region;intracellular membrane-bounded organelle;intracellular organelle;macromolecular complex;organelle;protein complex;transcriptional repressor complex;vesicle	Systemic lupus erythematosus	11.57	13.1081	12.5103	10.8953	NaN	NaN	11.8794	11.9645	NaN	11.6713	12.5443	11.6078	NaN	NaN	12.5155	13.1603	NaN	NaN	NaN	NaN	10.8334	NaN	NaN	NaN	NaN	13.2525	12.7531	NaN	NaN	14.3186	11.2134	NaN
EMC1	Q8N766	ER membrane protein complex subunit 1	0.153872	0.116343	0.017902		0.863802	-0.540732	-0.467085		0.353898	0.300918	0.106494			cell part;macromolecular complex;protein complex		11.6111	11.5248	12.0123	11.7026	11.9647	11.0764	11.954	12.2363	11.9231	11.3016	11.6823	12.3097	10.5104	11.5049	10.632	11.4851	10.9384	11.5581	11.7722	10.6693	11.9828	NaN	11.6892	11.8192	11.3435	11.5745	12.0857	10.1053	NaN	11.6735	11.4625	11.8419
EMD	P50402	Emerin	0.958123	0.185761	0.177982		0.272398	0.195337	0.0532095		0.100411	0.0485489	0.00487482		anatomical structure development;biological regulation;cell cycle;cell differentiation;cellular component disassembly;cellular component organization;cellular membrane organization;cellular process;developmental process;membrane organization;mitotic cell cycle;multicellular organismal process;muscle contraction;regulation of transport;response to chemical stimulus;response to stimulus	cell part;endoplasmic reticulum;intracellular membrane-bounded organelle;intracellular organelle;macromolecular complex;membrane;nuclear envelope;organelle;protein complex	Arrhythmogenic right ventricular cardiomyopathy (ARVC);Dilated cardiomyopathy;Hypertrophic cardiomyopathy (HCM)	15.1871	15.3436	15.3202	15.6328	15.5075	15.5357	15.4223	15.4347	15.5992	15.905	15.3115	15.9863	15.1815	15.6126	14.1682	15.1056	15.5135	14.8861	15.2097	15.7386	15.2115	15.1144	15.7178	15.6009	15.4581	15.2919	16.1027	15.9106	15.3553	15.8035	15.0425	15.1943
EML1	O00423	Echinoderm microtubule-associated protein-like 1	0.0866205	0.134781	0.0116748		0.416555	0.321244	0.133816		0.0248332	-0.0392869	-0.000975621		anatomical structure development;cell differentiation;cell proliferation;cellular component organization;cellular process;cytoskeleton organization;developmental process;organelle organization	cell part;cytosol;macromolecular complex;protein complex		12.7955	12.181	12.6716	12.536	12.5495	13.1292	11.8464	12.3826	12.3234	12.0032	11.1339	12.6022	12.59	12.5649	NaN	11.3921	12.8424	12.2466	NaN	11.8034	12.4335	12.4763	NaN	NaN	NaN	NaN	11.6123	12.6585	12.1799	NaN	12.7162	12.454
ENDOD1	O94919	Endonuclease domain-containing 1 protein	0.231627	-0.0984672	-0.0228076		0.0497147	0.0259282	0.00128901		0.197142	0.0790366	0.0155814			cell part;extracellular organelle;membrane;organelle;vesicle	Apoptosis	15.4831	15.3731	15.3437	15.6182	15.6249	15.5458	15.6346	15.5551	15.6715	15.6776	15.7232	15.7153	15.1614	15.2416	15.521	14.715	14.9166	15.087	15.7404	15.4458	15.6678	15.5634	15.3654	15.7054	15.4694	15.0307	15.0816	15.3235	15.3202	15.144	14.7438	14.9954
ENDOG	Q14249	Endonuclease G, mitochondrial	0.0193801	0.00803328	0.000155686		0.724976	-0.215926	-0.156541		0.0684362	-0.0286333	-0.00195955		biological regulation;catabolic process;cellular metabolic process;cellular nitrogen compound metabolic process;cellular process;developmental process;DNA metabolic process;DNA recombination;embryo development;macromolecule metabolic process;metabolic process;nitrogen compound metabolic process;nucleobase-containing compound metabolic process;primary metabolic process;response to chemical stimulu…	cell part;intracellular membrane-bounded organelle;intracellular organelle;mitochondrion;organelle	Apoptosis	15.0922	15.3436	15.7274	15.2438	15.3104	15.3953	15.4019	15.7035	15.8025	15.3216	15.3788	15.2821	15.4262	15.4885	15.2715	15.5185	15.7516	15.9315	15.4386	15.0883	15.5026	15.1882	15.5565	15.5055	15.3681	15.1723	14.9732	14.9171	15.3334	15.0247	15.7782	15.7571
ENO1	P06733	Alpha-enolase	1.49255	-0.0872552	-0.130232		0.300611	-0.032993	-0.00991805		0.579715	-0.0756712	-0.0438677		alcohol metabolic process;biological regulation;biosynthetic process;carbohydrate metabolic process;cellular metabolic process;cellular nitrogen compound metabolic process;cellular process;macromolecule metabolic process;metabolic process;multi-organism process;nitrogen compound metabolic process;nucleobase-containing compound metabolic process;primary metabolic process;response to biotic stimulu…	cell part;cytoplasm;cytosol;extracellular organelle;extracellular space;intracellular membrane-bounded organelle;intracellular organelle;macromolecular complex;membrane;nucleus;organelle;plasma membrane;protein complex;vesicle	Glycolysis / Gluconeogenesis;Methane metabolism;RNA degradation	20.183	20.1716	20.2326	20.1503	20.2786	20.0992	20.2607	20.2169	20.2213	20.1496	20.063	20.0472	20.2646	20.1483	20.167	20.1445	20.1291	20.1703	20.2439	20.1184	20.2726	20.1959	20.1561	20.3401	20.2725	20.0987	20.2147	20.2514	20.3447	20.0456	20.1083	20.0555
ENO3	P13929	Beta-enolase	0.128277	-0.0214001	-0.00274515		0.0502967	-0.0120309	-0.000605115		0.460217	-0.154328	-0.0710246		aging;alcohol metabolic process;anatomical structure development;anatomical structure morphogenesis;biosynthetic process;carbohydrate metabolic process;cellular metabolic process;cellular process;developmental process;growth;metabolic process;primary metabolic process;response to chemical stimulus;response to drug;response to stimulus;small molecule metabolic process	cell part;cytoplasm;cytosol;extracellular organelle;extracellular space;macromolecular complex;membrane;organelle;plasma membrane;protein complex;vesicle	Glycolysis / Gluconeogenesis;Methane metabolism;RNA degradation	21.3525	21.2311	21.5175	21.3945	21.3931	21.4398	21.3682	21.4046	21.3392	21.1421	21.2809	20.5941	21.4799	21.2197	21.1998	21.4094	21.3598	21.6011	21.3537	21.2835	21.3222	21.281	21.4558	21.5468	21.2309	21.2134	21.2935	21.5854	21.5384	21.1369	21.1937	21.4981
EPB41	P11171	Protein 4.1	0.579187	0.252249	0.146099		0.121099	0.091073	0.0110288		0.736082	-1.19465	-0.879361		biological regulation;blood circulation;cellular component organization;cellular process;circulatory system process;cytoskeleton organization;multicellular organismal process;organelle organization	cell part;cytoskeleton;Golgi apparatus;intracellular membrane-bounded organelle;intracellular non-membrane-bounded organelle;intracellular organelle;macromolecular complex;membrane;nucleus;organelle;plasma membrane;protein complex	Tight junction	13.3526	14.4088	14.3192	14.6481	14.4571	14.1595	14.5597	14.4636	13.3486	14.8136	14.2647	14.0785	13.9477	14.7341	14.5567	14.8917	13.4964	NaN	14.2647	14.1414	14.7172	14.0591	14.5498	NaN	14.344	14.18	14.1691	13.7556	14.3637	14.4614	14.5816	14.6358
EPDR1	Q9UM22	Mammalian ependymin-related protein 1	0.264831	0.250814	0.0664233		0.255577	-0.246007	-0.0628735		0.0795978	-0.0503581	-0.0040084		biological adhesion;cell adhesion;cellular process	cell part;extracellular organelle;intracellular membrane-bounded organelle;intracellular organelle;lysosome;organelle;vacuole;vesicle		NaN	11.9449	11.5214	10.7543	12.1062	11.9176	11.9636	12.2069	12.6159	12.1103	12.3025	12.6242	12.7037	12.7876	12.4994	12.7034	12.6082	11.9273	NaN	12.2579	NaN	NaN	12.3443	12.7874	12.2231	12.0784	12.8121	11.2606	12.9572	12.7708	12.094	NaN
EPHX1	P07099	Epoxide hydrolase 1	0.476417	-0.122423	-0.0583243		0.209095	0.0663449	0.0138724		0.0193605	0.0120234	0.00023278		catabolic process;cellular aromatic compound metabolic process;cellular metabolic process;cellular process;metabolic process;response to chemical stimulus;response to stimulus	cell part;membrane	Bile secretion;Metabolism of xenobiotics by cytochrome P450	16.2798	16.1719	15.8813	16.2863	16.2177	16.137	16.2152	15.8812	16.2476	16.1408	16.2413	16.9259	15.9859	15.7728	15.7766	15.9266	15.6223	16.0328	16.4758	16.2421	16.3044	16.3329	16.1608	16.2944	16.3212	16.3783	16.4833	16.3783	16.4787	15.5781	16.0083	16.1054
EPM2A	O95278	Laforin	0.730584	-1.12652	-0.823019		0.861158	-1.21947	-1.05016		0.514793	-0.429823	-0.22127		alcohol metabolic process;anatomical structure development;autophagy;behavior;biosynthetic process;carbohydrate metabolic process;catabolic process;cellular metabolic process;cellular process;developmental process;energy reserve metabolic process;generation of precursor metabolites and energy;macromolecule metabolic process;macromolecule modification;metabolic process;multicellular organismal pro…	cell part;cytoplasm;cytosol;endoplasmic reticulum;intracellular membrane-bounded organelle;intracellular organelle;macromolecular complex;membrane;nucleus;organelle;plasma membrane;polysome;ribonucleoprotein complex		13.6052	NaN	13.4296	NaN	12.1522	12.9379	NaN	11.8559	12.7806	NaN	13.5991	NaN	13.0395	12.2486	13.8266	12.202	13.5278	13.025	13.8804	13.1469	13.2035	NaN	12.841	12.007	13.7487	12.4937	14.4391	12.1677	14.1581	13.6148	13.7881	13.4453
EPRS1	P07814	Bifunctional glutamate/proline--tRNA ligase	0.468228	0.174344	0.0816329		1.78813	-0.241711	-0.432211		0.00726262	-0.00598653	-4.34779e-05		amine metabolic process;biological regulation;cellular amino acid metabolic process;cellular component assembly;cellular component organization;cellular ketone metabolic process;cellular metabolic process;cellular nitrogen compound metabolic process;cellular process;macromolecular complex assembly;macromolecule metabolic process;metabolic process;nitrogen compound metabolic process;nucleobase-con…	cell part;cytoplasm;cytosol;macromolecular complex;membrane;protein complex;ribonucleoprotein complex	Aminoacyl-tRNA biosynthesis;Porphyrin and chlorophyll metabolism	13.7198	13.9888	14.2168	14.2603	13.921	14.704	13.9335	14.3706	14.3491	14.0076	15.2761	14.6853	14.1696	14.4441	14.2023	14.0252	14.0373	14.4284	14.2647	13.8172	14.6719	14.0271	14.3933	14.417	14.1872	14.765	14.321	14.0761	14.3114	13.5306	13.9487	13.884
ERAP1	Q9NZ08	Endoplasmic reticulum aminopeptidase 1	0.0553444	0.0905387	0.0050108		0.938215	-0.789574	-0.74079		0.256652	0.394361	0.101213		anatomical structure formation involved in morphogenesis;biological regulation;cell differentiation;cellular process;developmental process;immune system process;macromolecule metabolic process;metabolic process;multi-organism process;primary metabolic process;protein metabolic process;proteolysis;response to biotic stimulus;response to stimulus	cell part;cytosol;endoplasmic reticulum;extracellular organelle;extracellular region;extracellular space;intracellular membrane-bounded organelle;intracellular organelle;membrane;organelle;vesicle		13.7075	NaN	13.7314	13.3603	NaN	13.0481	13.7085	13.1739	13.8274	13.457	13.5907	14.4089	13.1822	13.7772	13.4192	13.3714	13.8386	13.6996	12.5495	13.1619	13.3477	NaN	13.7736	14.0007	NaN	13.6277	13.9444	13.5866	14.0969	13.6693	13.3886	13.4372
ERLIN2	O94905	Erlin-2	0.288959	-0.196355	-0.0567386		0.269361	-0.125243	-0.0337354		0.129722	-0.0966508	-0.0125377		catabolic process;cellular metabolic process;cellular process;macromolecule metabolic process;metabolic process;primary metabolic process;protein metabolic process;proteolysis;proteolysis involved in cellular protein catabolic process	cell part;cytoplasm;endoplasmic reticulum;extracellular organelle;intracellular membrane-bounded organelle;intracellular organelle;macromolecular complex;membrane;organelle;plasma membrane;protein complex;vesicle		14.9372	15.1397	15.0073	15.0526	14.9776	15.1822	14.9363	15.1661	15.0004	15.0677	15.529	15.7196	14.7154	14.4688	14.5213	13.9702	14.4748	14.155	14.6891	14.8863	14.8179	14.7215	15.0044	14.6039	16.4508	14.8715	14.8895	14.9239	14.7897	14.3515	15.0393	15.0576
ERP29	P30040	Endoplasmic reticulum resident protein 29	0.442496	0.69255	0.306451		0.0494524	-0.116179	-0.00574533		0.405531	-0.530553	-0.215156		biological regulation;cellular metabolic process;cellular process;establishment of localization;macromolecule metabolic process;macromolecule modification;metabolic process;phosphorus metabolic process;primary metabolic process;protein folding;protein metabolic process;protein modification process;protein phosphorylation;protein transport;regulation of protein modification process;regulation of t…	cell part;cell surface;cytoplasmic membrane-bounded vesicle;endoplasmic reticulum;extracellular organelle;intracellular membrane-bounded organelle;intracellular organelle;membrane;organelle;vesicle	Protein processing in endoplasmic reticulum	13.5575	14.1776	12.1635	12.7043	13.6454	NaN	12.8195	13.4614	14.1403	13.5898	13.5185	14.3412	12.6454	13.7737	13.6467	14.3616	14.3735	13.8704	12.8953	14.1629	13.6791	14.1304	13.571	13.197	NaN	NaN	NaN	13.2934	13.3599	NaN	12.6686	13.7102
ESD	P10768	S-formylglutathione hydrolase	0.314026	-0.0535997	-0.0168317		0.182689	0.0369933	0.00675828		0.240765	-0.0465314	-0.0112031		catabolic process;cellular aldehyde metabolic process;cellular metabolic process;cellular process;metabolic process;small molecule metabolic process	cell part;cytoplasm;cytoplasmic membrane-bounded vesicle;extracellular organelle;Golgi apparatus;intracellular membrane-bounded organelle;intracellular organelle;membrane;nucleoplasm;organelle;plasma membrane;vesicle	Methane metabolism	18.3075	18.2084	18.0014	18.1946	18.2948	18.3067	18.0408	17.9308	17.8532	17.8911	17.9022	18.0198	18.2461	18.1255	18.226	18.2022	18.1273	18.0916	18.1163	18.0346	18.0726	18.2023	18.0397	18.0767	18.3088	18.2658	17.9587	18.0794	18.2023	17.9848	18.1821	18.3149
ESYT1	Q9BSJ8	Extended synaptotagmin-1	0.535922	0.341767	0.18316		0.658697	-0.349864	-0.230454		0.667837	0.456547	0.304899		establishment of localization;lipid transport;transport	cell part;membrane;plasma membrane		12.8588	12.6322	13.6324	13.329	12.367	13.4882	11.6109	13.2149	12.3972	12.7169	13.1268	14.6668	13.0563	12.7986	13.1454	12.8751	12.6506	13.7627	11.9379	12.9279	12.6129	12.6942	13.5838	12.496	13.039	13.1294	13.9084	12.8061	13.317	13.2156	13.4026	13.2533
ETFA	P13804	Electron transfer flavoprotein subunit alpha, mitochondrial	0.208087	0.110968	0.0230909		0.600136	0.198131	0.118906		1.40322	-0.18826	-0.26417		cellular metabolic process;cellular process;generation of precursor metabolites and energy;metabolic process;small molecule metabolic process	cell part;extracellular organelle;intracellular membrane-bounded organelle;intracellular organelle;mitochondrion;organelle;vesicle		16.6752	16.7265	16.505	16.8273	16.8926	16.8683	16.8346	16.8771	17.1851	17.322	17.0128	16.8339	17.643	17.5647	17.4254	17.4859	17.1283	16.9138	17.048	17.3643	17.3141	17.4097	16.9692	16.9492	17.3284	17.6962	17.0568	17.375	17.2543	16.6803	17.3954	17.3614
ETFB	P38117	Electron transfer flavoprotein subunit beta	0.311856	0.902927	0.281583		0.288691	0.766851	0.221383		0.622439	1.2881	0.801763		cellular metabolic process;cellular process;generation of precursor metabolites and energy;metabolic process;small molecule metabolic process	cell part;extracellular organelle;intracellular membrane-bounded organelle;intracellular organelle;mitochondrion;organelle;vesicle		NaN	NaN	NaN	NaN	NaN	14.8246	14.7118	15.0994	15.3516	15.5005	15.0447	14.3712	16.3537	16.5458	15.8807	16.6193	16.1762	15.941	14.2262	15.5783	14.732	15.6032	NaN	14.9943	NaN	14.8735	NaN	14.6921	14.8514	14.6641	15.2245	15.9001
ETFDH	Q16134	Electron transfer flavoprotein-ubiquinone oxidoreductase, mitochondrial	0.137931	-0.0435508	-0.00600701		0.133913	0.0426502	0.00571143		0.422884	-0.146863	-0.0621062		catabolic process;cellular ketone metabolic process;cellular lipid metabolic process;cellular metabolic process;cellular process;generation of precursor metabolites and energy;lipid metabolic process;metabolic process;organic acid metabolic process;primary metabolic process;response to chemical stimulus;response to oxidative stress;response to stimulus;response to stress;small molecule metabolic …	cell part;membrane		16.4408	16.1828	16.1401	16.443	16.5331	16.5702	16.289	16.3936	16.2446	16.3341	15.9983	15.7463	16.9401	16.634	16.7331	16.7458	16.6586	16.4889	16.6434	16.6321	16.6309	16.6255	16.6341	16.3948	16.386	16.5497	16.3085	16.298	16.5087	16.1721	16.6081	16.6539
EXOC4	Q96A65	Exocyst complex component 4	0.570866	0.346609	0.197868		0.506607	0.318806	0.16151		0.00216386	-0.00276899	-5.9917e-06		cellular component organization;cellular metabolic process;cellular process;establishment of localization;macromolecule metabolic process;membrane docking;membrane organization;metabolic process;organelle organization;primary metabolic process;protein metabolic process;protein transport;transport	cell part;cytoplasm;cytosol;macromolecular complex;membrane;plasma membrane;protein complex	Tight junction	NaN	NaN	NaN	11.7545	10.3153	10.9792	10.8445	11.4058	10.7052	10.9889	10.8946	11.2213	10.6568	10.3791	11.0752	10.6046	10.4778	10.6471	NaN	11.2796	NaN	10.3505	NaN	NaN	NaN	11.8575	NaN	NaN	NaN	NaN	NaN	11.1379
EYA3	Q99504	Eyes absent homolog 3	1.25532	-0.2874	-0.360778		0.468072	-0.148414	-0.0694685		0.386074	-0.169221	-0.0653317		anatomical structure morphogenesis;biological regulation;biosynthetic process;cellular component organization;cellular metabolic process;cellular nitrogen compound metabolic process;cellular process;chromatin modification;chromatin organization;chromosome organization;developmental process;DNA metabolic process;DNA repair;histone modification;macromolecule metabolic process;macromolecule modifica…	cell part;centrosome;cytoplasm;intracellular membrane-bounded organelle;intracellular non-membrane-bounded organelle;intracellular organelle;macromolecular complex;microtubule organizing center;nucleoplasm;nucleus;organelle;protein complex;transcription factor complex		19.0575	18.9012	19.1977	18.9708	18.966	18.9523	19.0688	19.1019	19.0242	18.8025	19.3287	18.3467	19.1072	18.7054	18.7501	19.2354	19.2673	19.6337	18.8914	18.5519	18.7905	18.4625	19.4703	19.3997	19.3937	18.4797	19.132	19.0904	19.3679	19.2397	19.0959	19.15
EZR	P15311	Ezrin	0.123813	-0.439665	-0.0544363		0.00145692	0.00641505	9.34624e-06		0.187448	0.410026	0.0768584		anatomical structure development;biological adhesion;biological regulation;cell adhesion;cell development;cellular component assembly;cellular component organization;cellular membrane organization;cellular metabolic process;cellular process;cytoskeleton organization;developmental process;endocytosis;establishment of localization;establishment or maintenance of cell polarity;locomotion;macromolecu…	apical part of cell;brush border;cell body;cell part;cell projection;cytoplasm;cytoskeleton;cytosol;extracellular organelle;extracellular space;filopodium;intracellular non-membrane-bounded organelle;intracellular organelle;macromolecular complex;membrane;microvillus;nucleolus;organelle;plasma membrane;protein complex;vesicle	Gastric acid secretion;Leukocyte transendothelial migration;Pathogenic Escherichia coli infection;Regulation of actin cytoskeleton	NaN	15.6571	NaN	NaN	15.0006	15.1032	15.6318	NaN	15.5736	15.0142	15.5979	16.6483	NaN	14.5703	15.057	15.3069	15.4017	16.0422	14.9552	15.2982	14.4478	15.7696	NaN	15.4443	NaN	NaN	15.1643	14.7296	15.4969	14.9154	15.5773	NaN
F13A1	P00488	Coagulation factor XIII A chain	0.956208	0.746655	0.713957		0.00799725	-0.0205104	-0.000164026		0.807834	0.630099	0.509016		biological regulation;cell activation;cellular metabolic process;cellular process;coagulation;establishment of localization;exocytosis;macromolecule metabolic process;macromolecule modification;metabolic process;multicellular organismal process;primary metabolic process;protein metabolic process;protein modification process;regulation of body fluid levels;secretion;transport;vesicle-mediated tran…	cell part;extracellular region	Complement and coagulation cascades	13.8856	15.9223	15.5768	14.9845	14.0185	14.3659	14.4477	14.6906	15.2584	13.7643	15.2756	15.7237	13.4796	13.8125	NaN	15.478	13.0442	14.5118	12.4885	14.2794	14.6946	13.5861	13.3203	14.2405	13.8083	13.8907	15.2729	14.3492	14.2308	14.061	13.8573	13.8515
FABP3	P05413	Fatty acid-binding protein, heart	0.210656	0.114027	0.0240204		0.608182	0.287924	0.175111		0.914221	-0.288212	-0.263489		biological regulation;catabolic process;cellular ketone metabolic process;cellular lipid metabolic process;cellular metabolic process;cellular process;glycerol ether metabolic process;homeostatic process;lipid metabolic process;metabolic process;organic acid metabolic process;primary metabolic process;response to chemical stimulus;response to drug;response to endogenous stimulus;response to stimu…	cell part;cytoplasm;cytosol;extracellular organelle;extracellular space;organelle;vesicle	PPAR signaling pathway	19.863	19.7775	19.3996	19.7994	19.5967	19.6362	20.2496	19.9597	20.1576	20.4399	20.3336	19.9041	20.7194	20.7724	20.5556	20.8537	20.4687	20.1546	19.8338	20.2227	20.1117	20.4272	20.0978	19.5886	19.7465	20.1426	19.6873	19.9103	20.0276	19.7554	20.3857	20.6071
FABP4	P15090	Fatty acid-binding protein, adipocyte	0.0258405	-0.0139955	-0.00036165		0.0849959	-0.0420389	-0.00357313		0.475053	0.210154	0.099834		biological regulation;catabolic process;cell differentiation;cellular lipid metabolic process;cellular metabolic process;cellular process;cytokine production;developmental process;glycerol ether metabolic process;homeostatic process;lipid metabolic process;metabolic process;multicellular organismal process;primary metabolic process;regulation of protein modification process;response to chemical s…	cell part;cytoplasm;cytosol;extracellular organelle;intracellular membrane-bounded organelle;intracellular organelle;lipid particle;nucleus;organelle;vesicle	PPAR signaling pathway	16.7386	16.6329	17.2425	17.0345	16.9434	16.857	17.1375	17.0328	17.4264	17.2353	17.0672	17.8762	17.3911	17.1158	17.2275	17.24	17.2219	17.2707	17.1653	17.4127	17.4045	17.4942	16.7235	17.3963	16.9771	17.4554	17.3078	17.1695	17.2935	17.2114	16.8232	16.4992
FABP5	Q01469	Fatty acid-binding protein 5	0.373087	0.187471	0.069943		0.482656	0.199701	0.0963871		0.219002	-0.111358	-0.0243875		alcohol metabolic process;amine metabolic process;anatomical structure development;biosynthetic process;carbohydrate metabolic process;carbohydrate transport;catabolic process;cellular lipid metabolic process;cellular metabolic process;cellular nitrogen compound metabolic process;cellular process;developmental process;establishment of localization;glycerol ether metabolic process;lipid metabolic …	cell part;cytoplasm;cytosol;extracellular organelle;nucleoplasm;organelle;vesicle	PPAR signaling pathway	15.3081	15.262	15.0366	15.6363	15.4604	15.3162	15.063	15.0229	15.0757	15.1143	15.8257	15.3378	15.4215	15.4686	15.4714	15.8788	15.4404	15.0753	14.208	14.7219	15.4411	14.8896	14.4634	14.937	14.5476	15.3468	14.9861	15.361	15.4437	15.5466	15.2409	15.0919
FAH	P16930	Fumarylacetoacetase	0.154248	0.0787586	0.0121484		0.231084	0.268157	0.0619667		0.188158	0.144195	0.0271314		amine metabolic process;catabolic process;cellular amino acid metabolic process;cellular aromatic compound metabolic process;cellular ketone metabolic process;cellular metabolic process;cellular nitrogen compound metabolic process;cellular process;metabolic process;nitrogen compound metabolic process;organic acid metabolic process;primary metabolic process;small molecule metabolic process	cell part;cytosol;extracellular organelle;organelle;vesicle	Styrene degradation;Tyrosine metabolism	13.1158	12.5458	NaN	12.9536	13.1611	12.9122	13.2567	13.7525	12.9969	12.8409	13.2665	13.6712	13.0196	13.4298	13.4934	13.3251	13.3925	12.8585	13.5139	13.5862	13.4728	13.9636	13.7873	13.8253	13.0037	13.4419	12.639	13.0706	11.943	13.1265	13.5363	13.1623
FAM120A	Q9NZB2	Constitutive coactivator of PPAR-gamma-like protein 1	0.159569	-0.327434	-0.0522484		0.175916	-0.145277	-0.0255566		0.447313	-0.567929	-0.254042			cell part;cytoplasm;membrane;plasma membrane		NaN	NaN	13.9687	13.4522	13.3731	13.2904	13.2698	13.444	13.5519	12.8729	13.4109	14.6292	13.4072	13.3186	NaN	13.4917	13.6462	NaN	13.9341	12.6273	13.8901	13.5178	13.8379	13.568	NaN	13.6609	14.2555	13.9237	12.8239	13.2462	13.776	NaN
FAM162A	Q96A26	Protein FAM162A	0.799852	1.52518	1.21991	+	0.305211	-0.345544	-0.105464		1.23535	-2.11419	-2.61176	+	biological regulation;cell death;cellular process;death;regulation of organelle organization;response to chemical stimulus;response to stimulus;response to stress	cell part;cytoplasm;extracellular organelle;intracellular membrane-bounded organelle;intracellular organelle;mitochondrion;nucleus;organelle;vesicle		NaN	NaN	14.8022	14.9612	14.9582	NaN	14.2641	15.0623	15.5494	15.4144	14.8315	14.5783	15.2447	14.9393	15.2941	15.0513	15.5654	14.9959	NaN	14.6413	15.359	15.2186	14.627	NaN	NaN	15.3931	14.4171	12.4409	14.901	NaN	14.9124	15.1896
FAM210B	Q96KR6	Protein FAM210B, mitochondrial	0.164876	0.138267	0.0227969		0.159515	0.111324	0.0177578		0.0748751	-0.0499441	-0.00373957			cell part		9.95259	10.9047	10.834	11.4592	10.9048	10.979	11.2938	10.0598	11.7285	11.4318	11.3802	11.413	10.4439	11.1425	10.2235	11.1152	11.6978	NaN	10.6364	11.52	11.5831	11.5716	11.5564	11.5125	11.7478	11.2561	11.476	10.9814	10.95	11.0736	10.8808	10.9018
FAM83G	A6ND36	Protein FAM83G	0.387442	0.916558	0.355113		0.868325	1.59784	1.38744	+	0.308311	-0.376475	-0.116071		biological regulation;cellular process;response to stimulus;signal transduction	cell part;cytosol;intracellular membrane-bounded organelle;intracellular organelle;nucleus;organelle		15.5764	15.2729	15.0303	15.5349	15.5938	15.754	15.3528	15.3349	15.0222	15.7274	15.3403	15.3488	15.9014	15.6818	15.225	15.3556	16.0985	15.8396	NaN	14.9844	NaN	14.7846	15.0572	15.2559	NaN	NaN	NaN	15.6026	14.9237	NaN	NaN	15.8026
FAM98A	Q8NCA5	Protein FAM98A	0.131174	-0.053853	-0.00706412		0.284419	-0.130234	-0.0370412		0.331117	-0.150831	-0.0499425			cell part;macromolecular complex;protein complex		13.5481	14.0785	14.0231	13.7017	13.8823	13.8454	13.9421	14.0094	13.8261	13.9875	13.9054	13.9702	13.9632	14.1832	14.052	13.6625	14.0664	13.7087	14.0988	13.5378	13.7259	13.9905	13.6997	13.4324	13.9367	13.4364	13.4405	13.044	13.1327	13.1132	14.1761	14.0966
FARSA	Q9Y285	Phenylalanine--tRNA ligase alpha subunit	0.747401	0.19918	0.148867		0.0496276	-0.0251379	-0.00124753		0.271185	0.186686	0.0506264		amine metabolic process;cellular amino acid metabolic process;cellular ketone metabolic process;cellular metabolic process;cellular nitrogen compound metabolic process;cellular process;macromolecule metabolic process;metabolic process;nitrogen compound metabolic process;nucleobase-containing compound metabolic process;organic acid metabolic process;primary metabolic process;RNA metabolic process;…	cell part;cytoplasm;cytosol;macromolecular complex;membrane;protein complex	Aminoacyl-tRNA biosynthesis	14.0666	14.2369	13.8161	13.3872	14.4683	14.2388	13.7718	14.3052	13.9865	13.5995	14.2652	14.8306	13.8971	14.6177	13.4644	14.025	13.8443	13.6889	14.2813	14.377	13.8473	14.1869	14.1957	14.1637	13.958	13.8323	14.1425	13.7257	12.894	13.8822	14.2237	14.0243
FARSB	Q9NSD9	Phenylalanine--tRNA ligase beta subunit	0.470889	0.168036	0.0791262		0.00760602	-0.00399462	-3.03832e-05		0.00845456	-0.00964864	-8.1575e-05		amine metabolic process;biosynthetic process;cellular amino acid metabolic process;cellular ketone metabolic process;cellular metabolic process;cellular nitrogen compound metabolic process;cellular process;macromolecule metabolic process;metabolic process;nitrogen compound metabolic process;nucleobase-containing compound metabolic process;organic acid metabolic process;primary metabolic process;p…	cell part;cytoplasm;cytosol;macromolecular complex;membrane;protein complex	Aminoacyl-tRNA biosynthesis	14.1369	13.9751	13.7225	14.1015	13.7352	14.1223	14.2849	14.3829	14.3132	14.3674	14.6142	15.6483	13.252	14.0935	13.489	13.9096	14.1384	14.0599	13.9351	14.1806	14.3407	14.054	14.3566	14.3751	14.1872	14.1747	14.5244	13.8755	14.2703	12.7953	14.2171	14.2147
FBL	P22087	rRNA 2'-O-methyltransferase fibrillarin	0.407064	-0.0987391	-0.0401932		0.096545	0.0451431	0.00435834		0.134645	0.066998	0.00902092		cell differentiation;cellular metabolic process;cellular nitrogen compound metabolic process;cellular process;developmental process;macromolecule metabolic process;macromolecule modification;metabolic process;nitrogen compound metabolic process;nucleobase-containing compound metabolic process;one-carbon metabolic process;primary metabolic process;RNA metabolic process;RNA modification;RNA process…	cell part;extracellular organelle;intracellular membrane-bounded organelle;intracellular non-membrane-bounded organelle;intracellular organelle;macromolecular complex;membrane;nucleolus;nucleus;organelle;preribosome;ribonucleoprotein complex;small nucleolar ribonucleoprotein complex;vesicle	Ribosome biogenesis in eukaryotes	16.2754	16.3951	16.3065	16.1826	16.1571	16.1915	16.0965	15.9979	16.1444	15.881	15.9523	16.8197	15.9481	15.731	15.2747	15.9753	16.0335	15.4778	16.1331	16.0835	16.0724	15.9037	16.2535	16.0629	16.1088	16.1364	16.3609	16.1787	16.115	16.2211	16.1335	15.7591
FBLN1	P23142	Fibulin-1	0.526207	0.445212	0.234273		0.115724	-0.208345	-0.0241105		2.524	0.984431	2.4847	+	cellular component organization;cellular process;extracellular matrix organization;extracellular structure organization;viral reproduction	extracellular matrix;extracellular organelle;extracellular region;extracellular space;organelle;proteinaceous extracellular matrix;vesicle		11.2041	10.6067	11.7348	11.6279	10.8899	11.643	11.3241	NaN	11.0741	9.46022	NaN	12.3362	NaN	10.9738	7.9643	10.1205	10.8917	11.4468	9.39041	10.9168	NaN	NaN	10.017	NaN	10.822	10.7818	11.1473	NaN	10.4309	11.2053	11.1676	11.848
FBLN5	Q9UBX5	Fibulin-5	0.10713	-0.0416916	-0.00446644		0.41018	-0.154848	-0.0635155		0.0910067	0.0685894	0.00624209		biological adhesion;biological regulation;cell adhesion;cellular component assembly;cellular component organization;cellular localization;cellular process;establishment of localization;extracellular matrix organization;extracellular structure organization;localization;secretion;transport	extracellular matrix;extracellular organelle;extracellular region;extracellular space;organelle;proteinaceous extracellular matrix;vesicle		15.5784	15.7372	15.8811	15.6509	15.8216	15.4206	15.5968	15.5756	15.9873	15.024	14.9068	16.4203	15.4287	15.49	15.472	15.5712	16.0521	16.1353	15.4046	15.015	15.336	15.6831	16.1421	15.5172	15.717	15.537	16.0168	15.8708	16.2444	15.3869	15.0492	15.1699
FBN1	P35555	Fibrillin-1	0.0238355	-0.0299487	-0.000713843		0.039477	-0.0562003	-0.00221862		0.172565	-0.229649	-0.0396293		anatomical structure development;anatomical structure morphogenesis;biological regulation;cellular component disassembly;cellular component organization;cellular process;developmental process;extracellular matrix organization;extracellular structure organization;response to chemical stimulus;response to endogenous stimulus;response to stimulus	extracellular matrix;extracellular organelle;extracellular region;extracellular space;organelle;proteinaceous extracellular matrix;vesicle		15.2365	15.2411	16.4364	15.5903	16.1704	15.5175	16.2316	14.8086	15.5906	15.1235	15.4466	16.5006	14.8419	15.4691	15.6803	14.7748	15.4431	15.5955	16.1259	15.647	15.3823	16.9242	17.9652	15.6967	15.6777	17.2072	16.186	14.7965	17.1674	17.2258	15.1384	14.6993
FBP2	O00757	Fructose-1,6-bisphosphatase isozyme 2	0.0338629	0.021678	0.000734078		0.0881566	-0.0485417	-0.00427927		0.290923	-0.239413	-0.0696508		alcohol metabolic process;biosynthetic process;carbohydrate metabolic process;cellular metabolic process;cellular process;metabolic process;primary metabolic process;small molecule metabolic process	cell part;cytosol;extracellular organelle;intracellular membrane-bounded organelle;intracellular organelle;nucleus;organelle;vesicle	Carbon fixation in photosynthetic organisms;Fructose and mannose metabolism;Glycolysis / Gluconeogenesis;Insulin signaling pathway;Methane metabolism;Pentose phosphate pathway	17.4201	17.4947	17.8667	17.4963	17.6205	17.6148	17.6177	17.5907	17.6446	17.2793	17.4636	16.0929	18.0255	17.6761	17.669	18.2634	18.1611	18.4866	17.521	17.6863	17.6824	17.5229	17.7073	17.8715	16.8602	16.7779	16.9803	17.282	17.4438	17.0797	17.6044	17.9533
FECH	P22830	Ferrochelatase, mitochondrial	0.0634225	-0.0210953	-0.00133792		0.834913	0.130376	0.108853		0.0470159	-0.0211515	-0.000994459		alcohol metabolic process;biological regulation;biosynthetic process;cell differentiation;cellular aromatic compound metabolic process;cellular component assembly;cellular component organization;cellular metabolic process;cellular nitrogen compound metabolic process;cellular process;cofactor metabolic process;detection of stimulus;developmental process;generation of precursor metabolites and ener…	cell part;intracellular membrane-bounded organelle;intracellular organelle;membrane;mitochondrion;organelle	Porphyrin and chlorophyll metabolism	15.0268	14.9471	14.7095	14.6794	14.9498	15.1885	14.8168	15.0656	14.6845	14.782	14.9935	14.6467	14.8914	15.1054	14.9457	15.0471	15.467	15.2288	14.8444	14.4279	14.5445	14.6844	14.8441	14.6763	14.6516	14.855	14.7177	14.9788	14.8348	14.8052	14.9036	14.6071
FEM1A	Q9BSK4	Protein fem-1 homolog A	0.0677726	-0.0191272	-0.0012963		0.289019	-0.115014	-0.0332412		0.050961	-0.0361298	-0.00184121		biological regulation;regulation of protein modification process	cell part;cytoplasm		13.94	13.9441	14.0329	13.6531	14.0068	13.6888	14.0185	14.3675	13.5587	13.2584	13.1116	13.2625	14.0757	13.9844	13.5415	13.882	13.8183	13.8856	13.805	13.6879	14.0266	13.5345	13.8353	14.0852	13.9389	13.8208	13.4487	13.8844	13.0553	12.8214	13.983	13.8417
FERMT2	Q96AC1	Fermitin family homolog 2	0.0752862	0.0246464	0.00185554		0.271119	-0.103834	-0.0281513		0.550057	0.169611	0.0932958		anatomical structure morphogenesis;biological adhesion;biological regulation;cell adhesion;cell junction organization;cell morphogenesis;cellular component assembly;cellular component morphogenesis;cellular component organization;cellular localization;cellular membrane organization;cellular process;developmental process;localization;macromolecular complex assembly;membrane organization;protein co…	cell cortex;cell part;cell surface;cytoplasm;cytosol;intracellular membrane-bounded organelle;intracellular organelle;macromolecular complex;nucleoplasm;nucleus;organelle;protein complex		13.5773	14.031	13.4951	14.1982	13.6536	14.0884	14.0912	14.0529	14.0077	13.7788	13.9962	14.2157	14.3506	14.1304	14.1015	14.0337	13.8858	14.1758	14.0491	14.0499	14.0304	13.3136	13.8137	13.8264	14.0106	14.2786	14.0503	14.0795	14.5128	14.4967	14.1594	13.8433
FH	P07954	Fumarate hydratase, mitochondrial	0.291692	0.0918659	0.0267965		0.552579	0.151386	0.0836526		0.472609	-0.142308	-0.0672558		biological regulation;catabolic process;cellular ketone metabolic process;cellular metabolic process;cellular process;cofactor metabolic process;homeostatic process;metabolic process;organic acid metabolic process;small molecule metabolic process	cell part;cytoplasm;extracellular organelle;intracellular membrane-bounded organelle;intracellular organelle;macromolecular complex;mitochondrion;organelle;protein complex;tricarboxylic acid cycle enzyme complex;vesicle	Carbon fixation pathways in prokaryotes;Citrate cycle (TCA cycle);Pathways in cancer;Renal cell carcinoma	17.3808	17.3329	17.1794	17.3385	17.4246	17.4369	17.2684	17.4747	17.4527	17.5126	17.502	17.2521	18.0028	17.8728	17.8059	17.9291	17.9176	17.7317	17.5039	17.6815	17.6673	17.8218	17.4565	17.5694	17.5072	17.7443	17.2394	17.6356	17.608	16.9599	17.6825	17.7906
[truncated: 944 more rows]
[truncated: 4 more columns]

## Sheet: TableS4_Supern_SMO_vs_Rest
Genes	Protein.Ids	First.Protein.Description	-Log 10 p-value (S1/R1)_Supernatant	Log 2 Fold Change (S1/R1)_Supernatant	Pie Value (S1/R1)_Supernatant	Significant (S1/R1)_Supernatant	-Log 10 p-value (S3/R3)_Supernatant	Log 2 Fold Change (S3/R3)_Supernatant	Pie Value (S3/R3)_Supernatant	Significant (S3/R3)_Supernatant	-Log 10 p-value (S4/R4)_Supernatant	Log 2 Fold Change (S4/R4)_Supernatant	Pie Value (S4/R4)_Supernatant	Significant (S4/R4)_Supernatant	GOBP slim name	GOCC slim name	KEGG name	M05_R1_Sup	M05_S1_Sup	M05_R3_Sup	M05_S3_Sup	M05_R4_Sup	M05_S4_Sup	M08_R1_Sup	M08_S1_Sup	M08_R3_Sup	M08_S3_Sup	M08_R4_Sup	M08_S4_Sup	M02_R1_Sup	M02_S1_Sup	M02_R3_Sup	M02_S3_Sup	M02_R4_Sup	M02_S4_Sup	M04_R1_Sup	M04_S1_Sup	M04_R3_Sup	M04_S3_Sup	M04_R4_Sup	M04_S4_Sup	M09_R1_Sup	M09_S1_Sup	M09_R3_Sup	M09_S3_Sup	M09_R4_Sup	M09_S4_Sup	M03_R1_Sup	M03_S1_Sup
[truncated: 3,054 more rows]
[truncated: 4 more columns]

[truncated: 3 more sheets: Table_S5_Pellet_Phospho, Table_S6_Supernatant_Phospho_, Table_S7_Antisera]
