# Supplementary material for: WITHDRAWN: Resistance exercise-induced skeletal muscle damage is mitigated by adaptation-dependent changes in protein localization and phosphorylation
Source: Research Square preprint supplement (doi:10.21203/rs.3.rs-4344887/v1), 2025-08-20
Supplement: Supplementary file 2 [file c969253c7ac4a19093528517.xlsx]

## Sheet: Fig. 1B
b. Torque
Subjects	pre loading (pre S1)	pre loding (pre S3)	pre loding (pre S4)
M1	1012	1090	1040
M2	952	990	934
M3	859	866	943
M4	950	1010	1000
M5	1170	1209	1138.2
M8	990	1036	1020
M9	1098	1162	1141.3
M10	404	443	394
b. Torque
Table Analyzed	Torque N=8
Friedman test
P value	0.0024
Exact or approximate P value?	Exact
P value summary	**
Are means signif. different? (P < 0.05)	Yes
Number of groups	3
Friedman statistic	10.8
Data summary
Number of treatments (columns)	3
Number of subjects (rows)	8
Multiple comparisons
Number of families	1
Number of comparisons per family	3
Q	0.05
Two-stage linear step-up procedure of Benjamini, Krieger and Yekutieli	Rank sum diff,	Discovery?	q value	Individual P Value
S1 vs. S3	-13	Yes	0.0024	0.0012	A-B
S1 vs. S4	-5	No	0.1479	0.2113	A-C
S3 vs. S4	8	Yes	0.0478	0.0455	B-C
Test details	Rank sum 1	Rank sum 2	Rank sum diff,	n1	n2
S1 vs. S3	10	23	-13	8	8
S1 vs. S4	10	15	-5	8	8
S3 vs. S4	23	15	8	8	8

## Sheet: Fig. 1C
c. Fatigue	% force redeuction pre- (R) to post-loading (S)
Subjects		S2	S3
M1	20.8498	12.1101	17.5962
M2	7.2479	9.49495	11.1349
M3	22.2352	10.97	16.9671
M4	16.3158	10.198	10.2
M5	19.6581	14.0612	8.91759
M8	22.8283	13.0309	19.8039
M9	11.2022	6.88468	11.8111
M10	19.3069	14.2212	15.7932
c. Fatigue
Table Analyzed	Fatigue_N=8
Friedman test
P value	0.023
Exact or approximate P value?	Exact
P value summary	*
Are means signif. different? (P < 0.05)	Yes
Number of groups	3
Friedman statistic	7.16
Data summary
Number of treatments (columns)	3
Number of subjects (rows)	8
Multiple comparisons
Number of families	1
Number of comparisons per family	3
Q	0.05
Two-stage linear step-up procedure of Benjamini, Krieger and Yekutieli	Rank sum diff,	Discovery?	q value	Individual P Value
S1 vs. S3	10.5	Yes	0.0182	0.0087	A-B
S1 vs. S4	4.5	No	0.1824	0.2606	A-C
S3 vs. S4	-6	No	0.1403	0.1336	B-C
Test details	Rank sum 1	Rank sum 2	Rank sum diff,	n1	n2
S1 vs. S3	21	10.5	10.5	8	8
S1 vs. S4	21	16.5	4.5	8	8
S3 vs. S4	10.5	16.5	-6	8	8

## Sheet: Fig. 1D
d. Fiber Area; Hypertrophy
	R1		S1		R3
subjects	Type I	Type II	Type I	Type II	Type I	Type II
M1	5655	6834	4785	5259	4608	5353
M2	7335	8313	7330	7602	8005	7845
M3	5872	6460	3973	5513	4086	5056
M4	6519	8859	6013	7951	6623	7606
M5	6832	7738	6221	7703	7068	9304
M8	4961	5350	4215	5086	4933	5835
M9	6043	7150	6417	7685	5131	5675
M10	3343	3872	3961	3866	5240	4313
d. Fiber Area; Hypertrophy
Table Analyzed	Hypertrophy Fiber Area 1_N=8
Friedman test
P value	0.0057
Exact or approximate P value?	Approximate
P value summary	**
Are means signif. different? (P < 0.05)	Yes
Number of groups	6
Friedman statistic	16.4
Data summary
Number of treatments (columns)	6
Number of subjects (rows)	8
Multiple comparisons
Number of families	1
Number of comparisons per family	3
Q	0.05
Two-stage linear step-up procedure of Benjamini, Krieger and Yekutieli	Rank sum diff,	Discovery?	q value	Individual P Value
I R1 vs. II R1	-19	Yes	0.0233	0.0111	A-B
I R3 vs. II R3	-16	Yes	0.0341	0.0325	C-D
I R4 vs. II R4	-11	No	0.0991	0.1416	E-F
Test details	Rank sum 1	Rank sum 2	Rank sum diff,	n1	n2
I R1 vs. II R1	23	42	-19	8	8
I R3 vs. II R3	15	31	-16	8	8
I R4 vs. II R4	23	34	-11	8	8

## Sheet: Fig. 1E
e. Lesions
Lesions/Aggregates identified via CRYAB staining
% of fibers containig lesions/aggregates
Subjects	S1	S3	S4
M1	12.1008	7.24541	11.976
M2	14.1827	8.51064	11.1987
M3	12.4378	4.90196	11.0906
M4	32.0755	24.0678	36.105
M5	29.7521	18.0617	17.8423
M8	16.2562	15.8672	15.3392
M9	27.7372	4.35644	24.0557
M10	4.32544	3.05603	4.00668
Mean	20.6	11.9	18.2
SD	10	7.6	9.8
e. Lesions
Table Analyzed	Lesions_n=8
Friedman test
P value	0.0024
Exact or approximate P value?	Exact
P value summary	**
Are means signif. different? (P < 0.05)	Yes
Number of groups	3
Friedman statistic	10.8
Data summary
Number of treatments (columns)	3
Number of subjects (rows)	8
Multiple comparisons
Number of families	1
Number of comparisons per family	3
Q	0.05
Two-stage linear step-up procedure of Benjamini, Krieger and Yekutieli	Rank sum diff,	Discovery?	q value	Individual P Value
S1 vs. S3	13	Yes	0.0024	0.0012	A-B
S1 vs. S4	8	Yes	0.0478	0.0455	A-C
S3 vs. S4	-5	No	0.1479	0.2113	B-C
Test details	Rank sum 1	Rank sum 2	Rank sum diff,	n1	n2
S1 vs. S3	23	10	13	8	8
S1 vs. S4	23	15	8	8	8
S3 vs. S4	10	15	-5	8	8

## Sheet: Fig. 1H
h. MS identifications (counts)
	Pellet	Supernatant
Proteins	1401	3905
Phosphosites	2854	3583
Phospho proteins	493	970

## Sheet: Fig. 2
Westernblot Quantificaitons												c. XIRP1 Pellet			d. FLNC Pellet			e. HSPB1 Pellet			f. HSPB5 Pellet			g. DEPTOR Pellet
c. XIRP1 Pellet
x	M2	M3	M4	M5	M8	M9						Table Analyzed	XIRP1_Pellet		Table Analyzed	FLNC_Pellet		Table Analyzed	HSPB1_Pellet		Table Analyzed	HSPB5_Pellet		Table Analyzed	Deptor_Pellet
R1	1.20758	1.09191	0.763903	0.818821	0.666107	0.757913
SMO1	2.06212	2.16984	2.36045	1.75934	2.48217	2.4261						Column B	SMO1		Column B	SMO1		Column B	SMO1		Column B	SMO1		Column B	SMO1
R3	1.32638	1.25643	0.917832	0.839996	1.43057	1.65104						vs.	vs,		vs.	vs,		vs.	vs,		vs.	vs,		vs.	vs,
SMO3	1.40787	1.55611	1.76764	2.08274	2.13689	1.56336						Column A	R1		Column A	R1		Column A	R1		Column A	R1		Column A	R1
R4	0.765858	0.634136	0.829206	1.01742	0.55254	0.624763
SMO4	1.2668	1.41149	1.53244	1.55727	1.12225	1.15978						Wilcoxon matched-pairs signed rank test			Wilcoxon matched-pairs signed rank test			Wilcoxon matched-pairs signed rank test			Wilcoxon matched-pairs signed rank test			Wilcoxon matched-pairs signed rank test
												P value	0.0313		P value	0.0313		P value	0.0313		P value	0.0313		P value	0.0313
												Exact or approximate P value?	Exact		Exact or approximate P value?	Exact		Exact or approximate P value?	Exact		Exact or approximate P value?	Exact		Exact or approximate P value?	Exact
												P value summary	*		P value summary	*		P value summary	*		P value summary	*		P value summary	*
d. FLNC Pellet												Significantly different (P < 0.05)?	Yes		Significantly different (P < 0.05)?	Yes		Significantly different (P < 0.05)?	Yes		Significantly different (P < 0.05)?	Yes		Significantly different (P < 0.05)?	Yes
	M2	M3	M4	M5	M8	M9						One- or two-tailed P value?	Two-tailed		One- or two-tailed P value?	Two-tailed		One- or two-tailed P value?	Two-tailed		One- or two-tailed P value?	Two-tailed		One- or two-tailed P value?	Two-tailed
R1	0.996694	1.02741	1.15127	1.25603	0.660494	0.772878						Sum of positive, negative ranks	21,00 , 0,000		Sum of positive, negative ranks	21,00 , 0,000		Sum of positive, negative ranks	21,00 , 0,000		Sum of positive, negative ranks	21,00 , 0,000		Sum of positive, negative ranks	21,00 , 0,000
SMO1	1.38006	1.48312	1.70072	1.65251	1.15342	1.47044						Sum of signed ranks (W)	21		Sum of signed ranks (W)	21		Sum of signed ranks (W)	21		Sum of signed ranks (W)	21		Sum of signed ranks (W)	21
R3	1.08319	1.29289	1.1793	1.04537	1.10118	1.36492						Number of pairs	6		Number of pairs	6		Number of pairs	6		Number of pairs	6		Number of pairs	6
SMO3	1.48718	1.44148	1.144	1.52259	1.80535	1.30605						Number of ties (ignored)	0		Number of ties (ignored)	0		Number of ties (ignored)	0		Number of ties (ignored)	0		Number of ties (ignored)	0
R4	1.11398	1.13819	0.831844	1.00913	1.20192	1.02609
SMO4	1.38063	1.09089	1.54476	1.01532	1.62004	1.57867						Median of differences			Median of differences			Median of differences			Median of differences			Median of differences
												Median	1.337		Median	0.4743		Median	5.495		Median	8.727		Median	1.444
												How effective was the pairing?			How effective was the pairing?			How effective was the pairing?			How effective was the pairing?			How effective was the pairing?
e. HSPB1 Pellet												rs (Spearman)	-0.8286		rs (Spearman)	0.8857		rs (Spearman)	0.1429		rs (Spearman)	-0.08571		rs (Spearman)	-0.08571
x	M2	M3	M4	M5	M8	M9						P value (one tailed)	0.0292		P value (one tailed)	0.0167		P value (one tailed)	0.4014		P value (one tailed)	0.4597		P value (one tailed)	0.4597
R1	1.41522	0.815358	0.984555	1.35574	1.12368	0.750356						P value summary	*		P value summary	*		P value summary	ns		P value summary	ns		P value summary	ns
SMO1	5.76299	5.73302	8.29335	6.71113	10.7833	6.38478						Was the pairing significantly effective?	Yes		Was the pairing significantly effective?	Yes		Was the pairing significantly effective?	No		Was the pairing significantly effective?	No		Was the pairing significantly effective?	No
R3	2.24425	1.30308	1.76737	0.720202	1.2954	1.82472
SMO3	5.31585	5.10441	4.92699	5.00636	4.21913	2.49723
R4	1.573	1.0022	1.24821	1.89663	1.23808	1.34812						Table Analyzed	XIRP1_Pellet		Table Analyzed	FLNC_Pellet		Table Analyzed	HSPB1_Pellet		Table Analyzed	HSPB5_Pellet		Table Analyzed	Deptor_Pellet
SMO4	4.98834	7.4105	3.46538	5.34219	2.48329	9.68817
												Column D	SMO3		Column D	SMO3		Column D	SMO3		Column D	SMO3		Column D	SMO3
f. HSPB5 Pellet												vs.	vs,		vs.	vs,		vs.	vs,		vs.	vs,		vs.	vs,
x	M2	M3	M4	M5	M8	M9						Column C	R3		Column C	R3		Column C	R3		Column C	R3		Column C	R3
R1	0.989756	0.805541	1.21739	1.23812	1.57636	0.776995
SMO1	10.2015	7.71563	9.4588	9.32128	12.3537	14.9075						Wilcoxon matched-pairs signed rank test			Wilcoxon matched-pairs signed rank test			Wilcoxon matched-pairs signed rank test			Wilcoxon matched-pairs signed rank test			Wilcoxon matched-pairs signed rank test
R3	0.989919	0.792853	0.944794	0.988676	1.41486	0.843733						P value	0.0938		P value	0.1563		P value	0.0313		P value	0.0313		P value	0.0313
SMO3	7.87958	7.33952	5.81365	6.59372	3.8455	4.76016						Exact or approximate P value?	Exact		Exact or approximate P value?	Exact		Exact or approximate P value?	Exact		Exact or approximate P value?	Exact		Exact or approximate P value?	Exact
R4	1.59039	0.298496	1.23778	1.15968	1.06867	1.00082						P value summary	ns		P value summary	ns		P value summary	*		P value summary	*		P value summary	*
SMO4	6.70361	8.57417	8.11331	8.96636	6.78426	7.81589						Significantly different (P < 0.05)?	No		Significantly different (P < 0.05)?	No		Significantly different (P < 0.05)?	Yes		Significantly different (P < 0.05)?	Yes		Significantly different (P < 0.05)?	Yes
												One- or two-tailed P value?	Two-tailed		One- or two-tailed P value?	Two-tailed		One- or two-tailed P value?	Two-tailed		One- or two-tailed P value?	Two-tailed		One- or two-tailed P value?	Two-tailed
g. DEPTOR Pellet												Sum of positive, negative ranks	19,00 , -2,000		Sum of positive, negative ranks	18,00 , -3,000		Sum of positive, negative ranks	21,00 , 0,000		Sum of positive, negative ranks	21,00 , 0,000		Sum of positive, negative ranks	21,00 , 0,000
x	M2	M3	M4	M5	M8	M9						Sum of signed ranks (W)	17		Sum of signed ranks (W)	15		Sum of signed ranks (W)	21		Sum of signed ranks (W)	21		Sum of signed ranks (W)	21
R1	1.38949	0.538215	0.828096	1.3391	1.10907	1.22525						Number of pairs	6		Number of pairs	6		Number of pairs	6		Number of pairs	6		Number of pairs	6
SMO1	2.82185	1.69976	3.09982	1.67017	2.56545	2.9027						Number of ties (ignored)	0		Number of ties (ignored)	0		Number of ties (ignored)	0		Number of ties (ignored)	0		Number of ties (ignored)	0
R3	1.05718	0.960987	1.2581	0.945923	0.602535	0.715946
SMO3	2.65697	3.03885	1.65673	2.04531	2.34221	2.13475						Median of differences			Median of differences			Median of differences			Median of differences			Median of differences
R4	0.675884	0.928966	1.20524	0.918487	0.796208	0.906799						Median	0.503		Median	0.2763		Median	3.116		Median	5.237		Median	1.509
SMO4	1.38853	2.65908	1.86263	3.00294	2.52414	1.77223
												How effective was the pairing?			How effective was the pairing?			How effective was the pairing?			How effective was the pairing?			How effective was the pairing?
												rs (Spearman)	-0.1429		rs (Spearman)	-0.6571		rs (Spearman)	0.1429		rs (Spearman)	-0.2		rs (Spearman)	-0.1429
												P value (one tailed)	0.4014		P value (one tailed)	0.0875		P value (one tailed)	0.4014		P value (one tailed)	0.3569		P value (one tailed)	0.4014
												P value summary	ns		P value summary	ns		P value summary	ns		P value summary	ns		P value summary	ns
												Was the pairing significantly effective?	No		Was the pairing significantly effective?	No		Was the pairing significantly effective?	No		Was the pairing significantly effective?	No		Was the pairing significantly effective?	No
												Table Analyzed	XIRP1_Pellet		Table Analyzed	FLNC_Pellet		Table Analyzed	HSPB1_Pellet		Table Analyzed	HSPB5_Pellet		Table Analyzed	Deptor_Pellet
												Column F	SMO4		Column F	SMO4		Column F	SMO4		Column F	SMO4		Column F	SMO4
												vs.	vs,		vs.	vs,		vs.	vs,		vs.	vs,		vs.	vs,
												Column E	R4		Column E	R4		Column E	R4		Column E	R4		Column E	R4
												Wilcoxon matched-pairs signed rank test			Wilcoxon matched-pairs signed rank test			Wilcoxon matched-pairs signed rank test			Wilcoxon matched-pairs signed rank test			Wilcoxon matched-pairs signed rank test
												P value	0.0313		P value	0.0938		P value	0.0313		P value	0.0313		P value	0.0313
												Exact or approximate P value?	Exact		Exact or approximate P value?	Exact		Exact or approximate P value?	Exact		Exact or approximate P value?	Exact		Exact or approximate P value?	Exact
												P value summary	*		P value summary	ns		P value summary	*		P value summary	*		P value summary	*
												Significantly different (P < 0.05)?	Yes		Significantly different (P < 0.05)?	No		Significantly different (P < 0.05)?	Yes		Significantly different (P < 0.05)?	Yes		Significantly different (P < 0.05)?	Yes
												One- or two-tailed P value?	Two-tailed		One- or two-tailed P value?	Two-tailed		One- or two-tailed P value?	Two-tailed		One- or two-tailed P value?	Two-tailed		One- or two-tailed P value?	Two-tailed
												Sum of positive, negative ranks	21,00 , 0,000		Sum of positive, negative ranks	19,00 , -2,000		Sum of positive, negative ranks	21,00 , 0,000		Sum of positive, negative ranks	21,00 , 0,000		Sum of positive, negative ranks	21,00 , 0,000
												Sum of signed ranks (W)	21		Sum of signed ranks (W)	17		Sum of signed ranks (W)	21		Sum of signed ranks (W)	21		Sum of signed ranks (W)	21
												Number of pairs	6		Number of pairs	6		Number of pairs	6		Number of pairs	6		Number of pairs	6
												Number of ties (ignored)	0		Number of ties (ignored)	0		Number of ties (ignored)	0		Number of ties (ignored)	0		Number of ties (ignored)	0
												Median of differences			Median of differences			Median of differences			Median of differences			Median of differences
												Median	0.5548		Median	0.3424		Median	3.43		Median	6.845		Median	1.297
												How effective was the pairing?			How effective was the pairing?			How effective was the pairing?			How effective was the pairing?			How effective was the pairing?
												rs (Spearman)	0.9429		rs (Spearman)	0.3143		rs (Spearman)	0.1429		rs (Spearman)	-0.3714		rs (Spearman)	0.4857
												P value (one tailed)	0.0083		P value (one tailed)	0.2819		P value (one tailed)	0.4014		P value (one tailed)	0.2486		P value (one tailed)	0.1778
												P value summary	**		P value summary	ns		P value summary	ns		P value summary	ns		P value summary	ns
												Was the pairing significantly effective?	Yes		Was the pairing significantly effective?	No		Was the pairing significantly effective?	No		Was the pairing significantly effective?	No		Was the pairing significantly effective?	No

## Sheet: Fig. 3B
Pellet										Supernatant
z.score_S1R1	z.score_S3R3	z.score_S4R4	Kinase.Gene							z.score_S1R1	z.score_S3R3	z.score_S4R4	Kinase.Gene
4.12264	4.55345	3.60151	PRKG1							3.11619	3.01069	3.09339	MAPKAPK2
2.0746	1.14434	1.42298	PAK1							2.09248	2.21617	2.71712	PRKG1
1.48884	2.60618	0.845072	PRKD1							1.88085	1.92364	2.62484	PRKCD
1.46861	1.70088	1.09442	MAPK1							1.81951	1.8796	2.38314	CDK1
1.35577	1.6575	2.13626	CDK1							1.42324	1.79015	2.32661	MAPK3
0.71482	0.506555	0.36811	CDK2							1.17032	1.77602	2.14257	CDK5
0.435041	0.229991	0.492659	AKT1							1.14851	1.44893	1.94847	MAPK11
0.123308	-0.0359303	0.081261	PRKACA							0.785064	1.07221	1.21185	MAPK1
-0.195	0.100303	-0.359731	PDK1							0.76045	0.889682	0.781866	CDK2
-0.195	0.100303	-0.359731	PDK2							0.439591	0.800927	0.723634	PDK1
-0.195	0.100303	-0.359731	PDPK1							0.439591	0.66877	0.60095	PDK2
-0.566425	-0.0831821	-0.236903	CSNK2A1							0.300769	0.414783	0.563656	PDPK1
										0.272207	0.123113	0.413345	AKT2
										-0.0812681	-0.142834	0.281239	SGK1
										-0.185475	-0.161162	0.149477	PRKD1
										-0.295186	-0.568558	0.145884	RPS6KB1
										-0.439671	-0.578184	0.090297	RPS6KA3
										-0.464189	-0.596984	-0.0190308	RPS6KA1
										-0.531347	-0.736151	-0.0351741	AKT1
										-0.802573	-0.736151	-0.307294	CSNK2A1
										-0.836696	-0.756451	-0.307294	MTOR
										-0.849611	-0.758864	-0.336218	PRKAA1
										-0.939611	-0.859646	-0.400781	PRKACA
										-1.00388	-1.43311	-0.54883	GSK3B
										-1.02181	-1.48888	-0.957576	PRKCA
Pellet S1R1										Supernatant S1R1
Kinase.Gene	mS	Enrichment	m	z.score	p.value	FDR				Kinase.Gene	mS	Enrichment	m	z.score	p.value	FDR
AKT1	0.18575	4.01405	4	0.435041	0.331766	0.460843				AKT1	-0.0859213	-1.4576	12	-0.531347	0.297589	0.492975
CDK1	0.465024	10.0492	8	1.35577	0.0875865	0.378494				AKT2	0.207378	3.51804	3	0.272207	0.392731	0.492975
CDK2	0.294719	6.36886	5	0.71482	0.23736	0.460843				CDK1	0.488563	8.28818	16	1.81951	0.0344168	0.492975
CSNK2A1	-0.25989	-5.61622	8	-0.566425	0.285552	0.460843				CDK2	0.286067	4.85296	10	0.76045	0.223493	0.492975
MAPK1	0.858166	18.545	3	1.46861	0.0709693	0.354846				CDK5	0.553263	9.38577	5	1.17032	0.120937	0.492975
PAK1	1.23136	26.6097	3	2.0746	0.019012	0.123152				CSNK2A1	-0.136768	-2.32019	15	-0.802573	0.211111	0.492975
PDK1	-0.166365	-3.59515	3	-0.195	0.422697	0.460843				GSK3B	-0.328124	-5.56644	6	-1.00388	0.157719	0.492975
PDK2	-0.166365	-3.59515	3	-0.195	0.422697	0.460843				MAPK1	0.293419	4.97768	10	0.785064	0.216208	0.492975
PDPK1	-0.166365	-3.59515	3	-0.195	0.422697	0.460843				MAPK11	0.685212	11.6242	3	1.14851	0.12538	0.492975
PRKACA	-0.00661705	-0.142994	11	0.123308	0.450932	0.460843				MAPK3	0.607715	10.3095	6	1.42324	0.0773329	0.492975
PRKD1	0.870626	18.8142	3	1.48884	0.0682646	0.354846				MAPKAPK2	1.53051	25.9642	4	3.11619	0.000916028	0.0723662
PRKG1	2.49264	53.866	3	4.12264	1.8728e-05	0.000312133				MTOR	-0.220441	-3.73966	8	-0.836696	0.201382	0.492975
										PDK1	0.29865	5.06642	3	0.439591	0.330117	0.492975
Pellet S3R3										PDK2	0.29865	5.06642	3	0.439591	0.330117	0.492975
Kinase.Gene	mS	Enrichment	m	z.score	p.value	FDR				PDPK1	0.20098	3.4095	4	0.300769	0.381795	0.492975
AKT1	0.056138	1.39485	4	0.229991	0.40905	0.496495				PRKAA1	-0.404334	-6.8593	3	-0.849611	0.197771	0.492975
CDK1	0.450929	11.2042	8	1.6575	0.0487089	0.257188				PRKACA	-0.130254	-2.20967	22	-0.939611	0.173709	0.492975
CDK2	0.149629	3.71781	5	0.506555	0.306233	0.496495				PRKCA	-0.335038	-5.68372	6	-1.02181	0.153436	0.492975
CSNK2A1	-0.0648962	-1.61247	8	-0.0831821	0.466853	0.496495				PRKCD	0.853375	14.477	5	1.88085	0.0299962	0.492975
MAPK1	0.782832	19.4509	3	1.70088	0.0444823	0.257188				PRKD1	-0.0286403	-0.485865	4	-0.185475	0.426428	0.492975
PAK1	0.513511	12.7592	3	1.14434	0.126242	0.496495				PRKG1	0.942765	15.9934	5	2.09248	0.0181976	0.492975
PDK1	0.00829156	0.206019	3	0.100303	0.460052	0.496495				RPS6KA1	-0.194169	-3.29396	3	-0.464189	0.321256	0.492975
PDK2	0.00829156	0.206019	3	0.100303	0.460052	0.496495				RPS6KA3	-0.14868	-2.52227	4	-0.439671	0.330088	0.492975
PDPK1	0.00829156	0.206019	3	0.100303	0.460052	0.496495				RPS6KB1	-0.0804493	-1.36477	4	-0.295186	0.383926	0.492975
PRKACA	-0.0493266	-1.22561	11	-0.0359303	0.485669	0.496495				SGK1	0.0246211	0.417683	5	-0.0812681	0.467614	0.492975
PRKD1	1.22091	30.3359	3	2.60618	0.00457796	0.0457796
PRKG1	2.16322	53.7493	3	4.55345	2.63867e-06	4.39779e-05				Supernatant S3R3
										Kinase.Gene	mS	Enrichment	m	z.score	p.value	FDR
Pellet S4R4										AKT1	0.141399	3.50471	12	0.414783	0.33915	0.476805
Kinase.Gene	mS	Enrichment	m	z.score	p.value	FDR				AKT2	-0.657953	-16.308	3	-1.43311	0.0759132	0.476805
AKT1	0.747201	1.50033	4	0.492659	0.311127	0.47716				CDK1	0.22806	5.65267	16	0.889682	0.186818	0.476805
CDK1	1.26204	2.53408	8	2.13626	0.016329	0.136075				CDK2	0.2541	6.2981	10	0.800927	0.211587	0.476805
CDK2	0.664551	1.33437	5	0.36811	0.356396	0.47716				CDK5	0.710668	17.6146	5	1.77602	0.0378651	0.427334
CSNK2A1	0.413299	0.829876	8	-0.236903	0.406366	0.47716				CSNK2A1	0.00522662	0.129547	15	-0.161162	0.435983	0.476805
MAPK1	1.13719	2.2834	3	1.09442	0.136885	0.47716				GSK3B	-0.220286	-5.46	6	-0.756451	0.224689	0.476805
PAK1	1.32908	2.6687	3	1.42298	0.0773704	0.429835				MAPK1	0.518106	12.8417	10	1.79015	0.0367153	0.427334
PDK1	0.287934	0.578152	3	-0.359731	0.359524	0.47716				MAPK11	0.562792	13.9493	3	1.07221	0.141812	0.476805
PDK2	0.287934	0.578152	3	-0.359731	0.359524	0.47716				MAPK3	0.803917	19.9258	6	2.21617	0.0133398	0.427334
PDPK1	0.287934	0.578152	3	-0.359731	0.359524	0.47716				MAPKAPK2	1.31079	32.4893	4	3.01069	0.00130329	0.10296
PRKACA	0.522809	1.04977	11	0.081261	0.467617	0.47716				MTOR	-0.129304	-3.20491	8	-0.568558	0.284828	0.476805
PRKD1	0.991565	1.991	3	0.845072	0.199035	0.47716				PDK1	-0.318352	-7.89065	3	-0.736151	0.230819	0.476805
PRKG1	2.60139	5.22341	3	3.60151	0.000158187	0.00263645				PDK2	-0.318352	-7.89065	3	-0.736151	0.230819	0.476805
										PDPK1	-0.27988	-6.93709	4	-0.758864	0.223967	0.476805
										PRKAA1	0.746352	18.499	3	1.44893	0.0736787	0.476805
										PRKACA	0.160679	3.98258	22	0.66877	0.251821	0.476805
										PRKCA	-0.47264	-11.7148	6	-1.48888	0.0682598	0.476805
										PRKCD	0.749762	18.5836	5	1.8796	0.0300816	0.427334
										PRKD1	0.0922967	2.28766	4	0.123113	0.451009	0.476805
										PRKG1	0.766387	18.9956	5	1.92364	0.0271997	0.427334
										RPS6KA1	-0.378526	-9.38213	3	-0.859646	0.194992	0.476805
										RPS6KA3	-0.203637	-5.04732	4	-0.578184	0.28157	0.476805
										RPS6KB1	-0.21157	-5.24395	4	-0.596984	0.275259	0.476805
										SGK1	-0.0135645	-0.336209	5	-0.142834	0.443211	0.476805
										Supernatant S4R4
										Kinase.Gene	mS	Enrichment	m	z.score	p.value	FDR
										AKT1	0.198562	293.682	12	0.781866	0.217147	0.497517
										AKT2	-0.484037	-715.913	3	-0.957576	0.169138	0.497517
										CDK1	0.576004	851.936	16	2.62484	0.00433447	0.114141
										CDK2	0.336661	497.937	10	1.21185	0.112786	0.497517
										CDK5	0.935085	1383.03	5	2.38314	0.00858281	0.157889
										CSNK2A1	-0.0900504	-133.189	15	-0.400781	0.344291	0.497517
										GSK3B	0.0528923	78.2301	6	0.145884	0.442006	0.497517
										MAPK1	0.594705	879.596	10	2.14257	0.0160738	0.211638
										MAPK11	0.366971	542.767	3	0.723634	0.234645	0.497517
										MAPK3	0.833437	1232.69	6	2.32661	0.009993	0.157889
										MAPKAPK2	1.19179	1762.71	4	2.71712	0.0032926	0.114141
										MTOR	-0.169448	-250.621	8	-0.54883	0.291561	0.497517
										PDK1	-0.154872	-229.063	3	-0.307294	0.37931	0.497517
										PDK2	-0.154872	-229.063	3	-0.307294	0.37931	0.497517
										PDPK1	-0.146712	-216.994	4	-0.336218	0.368353	0.497517
										PRKAA1	0.304869	450.916	3	0.60095	0.273937	0.497517
										PRKACA	0.0779394	115.276	22	0.413345	0.339677	0.497517
										PRKCA	-0.0119137	-17.621	6	-0.0351741	0.48597	0.497517
										PRKCD	1.21357	1794.92	5	3.09339	0.000989409	0.0781633
										PRKD1	0.0662024	97.9165	4	0.149477	0.440589	0.497517
										PRKG1	0.764656	1130.96	5	1.94847	0.0256791	0.289807
										RPS6KA1	0.0463833	68.6031	3	0.090297	0.464026	0.497517
										RPS6KA3	0.247767	366.458	4	0.563656	0.286494	0.497517
										RPS6KB1	0.123963	183.348	4	0.281239	0.389263	0.497517
										SGK1	-0.00678571	-10.0364	5	-0.0190308	0.492408	0.497517

## Sheet: Fig. 3C
Z-Score values
M2R1_Pel	M3R1_Pel	M4R1_Pel	M5R1_Pel	M8R1_Pel	M9R1_Pel	M2S1_Pel	M3S1_Pel	M4S1_Pel	M5S1_Pel	M8S1_Pel	M9S1_Pel	M2R3_Pel	M3R3_Pel	M4R3_Pel	M5R3_Pel	M8R3_Pel	M9R3_Pel	M2S3_Pel	M3S3_Pel	M4S3_Pel	M5S3_Pel	M8S3_Pel	M9S3_Pel	M2R4_Pel	M3R4_Pel	M4R4_Pel	M5R4_Pel	M8R4_Pel	M9R4_Pel	M2S4_Pel	M3S4_Pel	M4S4_Pel	M5S4_Pel	M8S4_Pel	M9S4_Pel	C: GOBP name	C: GOMF name	C: GOCC name	C: KEGG name	C: ANOVA Significant	C: Significant pairs	N: Best Localization Probability	N: -Log ANOVA p value	T: Protein	T: Index	T: Gene	T: Peptide
R1						S1						R3						S3						R4						S4
0.0053523	0.868346	-0.202524	-0.729207	-0.113057	0.00396675	0.540416	1.71069	0.960848	-0.151535	0.896736	0.883999	-0.134847	-2.10344	-0.128449	-0.513822	0.838217	1.03131	0.174195	0.273922	0.153398	0.68128	0.28025	0.205855	-2.50308	-1.62277	-0.371475	-2.50229	-1.28004	0.0458425	0.301956	0.529194	0.353114	-0.237237	1.79214	0.06275	actin cytoskeleton organization;actin filament-based process;anatomical structure development;anatomical structure morphogenesis;cardiac muscle tissue morphogenesis;cardiac septum development;cell junction organization;cell-cell junction organization;cellular component organization;cellular component organization at cellular level;cellular component organization or biogenesis;cellular component o…		cell junction;cell part;contractile fiber part;cytoplasmic part;intracellular part;organelle part;Z disc		+	S1_Pel_R4_Pel;S3_Pel_R4_Pel;S4_Pel_R4_Pel	0.937	3.13712	A4UGR9	A4UGR9_S1629	XIRP2	TVsETDIIPGDVHNTVK
-0.24299	0.584169	-0.324484	-1.67608	-0.316253	-0.638259	0.797142	1.40422	1.72193	-0.13157	1.34432	1.58026	-0.698911	-0.636458	-0.791978	-0.610839	0.853918	1.98322	-0.446096	-1.77978	0.109796	0.520351	0.51047	0.0800005	-0.900096	0.114499	-1.3203	-0.111542	-1.05646	-0.694322	-0.237239	-0.596753	0.427524	-0.642206	2.31907	-0.498271	actin cytoskeleton organization;actin filament-based process;anatomical structure development;anatomical structure morphogenesis;cardiac muscle tissue morphogenesis;cardiac septum development;cell junction organization;cell-cell junction organization;cellular component organization;cellular component organization at cellular level;cellular component organization or biogenesis;cellular component o…		cell junction;cell part;contractile fiber part;cytoplasmic part;intracellular part;organelle part;Z disc		+	S1_Pel_R1_Pel;S1_Pel_R4_Pel	0.932	1.55917	A4UGR9	A4UGR9_S497	XIRP2	MHQsQEESAVTISK
-0.43998	0.837725	-1.50788	-1.02086	0.426476	-1.18489	0.584117	2.60542	1.59488	0.0596687	0.831357	1.00379	-0.724991	-0.901647	-0.0255318	-0.414619	-0.264731	1.35704	-1.71256	0.122026	0.227494	0.868628	-0.264543	0.035656	0.338442	-1.30622	-0.589891	-0.843219	-1.42576	-1.38548	0.0159782	0.763505	0.943674	-0.0560264	1.5059	-0.0529385	actin cytoskeleton organization;actin filament-based process;anatomical structure development;anatomical structure morphogenesis;cardiac muscle tissue morphogenesis;cardiac septum development;cell junction organization;cell-cell junction organization;cellular component organization;cellular component organization at cellular level;cellular component organization or biogenesis;cellular component o…		cell junction;cell part;contractile fiber part;cytoplasmic part;intracellular part;organelle part;Z disc		+	S1_Pel_R1_Pel;S1_Pel_R4_Pel	0.944	2.51665	A4UGR9	A4UGR9_S868	XIRP2	GIsAQEIQTGNVK
1.10214	0.757661	1.12337	0.44803	0.122454	0.880937	-1.16963	-1.35414	-0.787677	-0.980344	-1.55788	-0.685695	-2.28152	0.516856	0.875624	0.998755	0.581383	1.42933	-0.59244	-0.461355	-0.486856	-0.309316	-1.7351	-0.468135	1.09174	1.03692	1.09682	0.661302	-0.371794	1.21305	-0.640921	-0.308522	0.30905	-0.385456	1.43277	-1.10142					+	R1_Pel_S1_Pel;R1_Pel_S3_Pel;R3_Pel_S1_Pel;R4_Pel_S1_Pel;R4_Pel_S3_Pel	0.933	3.2993	A8MZF0	A8MZF0_S162	PRR33	VsSPAWASsPTPPSGPHPCPVPK;VsSPAWAsSPTPPSGPHPCPVPK
0.406408	0.0526317	0.372037	-0.1152	0.186998	0.299422	0.274973	-0.270896	0.219649	-0.079442	0.380392	0.273363	0.149194	-0.11108	0.488153	-0.0389765	0.707211	0.705799	0.518437	0.306913	0.520407	0.172281	0.660678	0.05972	-3.26522	0.107079	-0.123484	0.0154604	-4.54296	0.189873	0.334284	0.294159	0.286451	0.168006	0.252708	0.144579					+	R3_Pel_R4_Pel;S3_Pel_R4_Pel	0.936	1.6231	D6RIA3	D6RIA3_S1187	C4orf54	VLNSSsPEGTVLVHR
-1.1218	-0.867031	-0.928766	-1.39028	-1.54295	-0.438566	1.02985	1.20191	1.12642	0.650503	1.10832	1.28975	-0.577383	-1.23096	-1.15872	-0.725389	-0.700989	-0.837808	0.801523	1.02494	1.06355	0.730738	1.03539	0.864798	-0.841556	-0.781257	-0.400069	-0.653827	-1.37808	-1.05561	0.899251	1.29836	1.08896	0.75951	-0.396271	1.05354					+	S1_Pel_R1_Pel;S1_Pel_R3_Pel;S1_Pel_R4_Pel;S3_Pel_R1_Pel;S3_Pel_R3_Pel;S3_Pel_R4_Pel;S4_Pel_R1_Pel;S4_Pel_R3_Pel;S4_Pel_R4_Pel	0.925	12.6985	D6RIA3	D6RIA3_S1423	C4orf54	FPQGPSPEsPSAAK
-2.92316	-0.114394	-0.102502	-1.02411	-0.293579	-0.414891	0.687225	0.740829	1.38483	0.386757	1.13151	1.4247	-0.805909	-0.196706	-0.486182	-0.338871	-0.0094076	0.400797	-0.29069	0.363496	1.16281	0.701265	1.17817	-1.49037	-0.926926	-0.198327	-0.960244	-0.894279	-0.719696	-0.528772	-1.08082	1.19229	1.49013	-0.849905	1.11981	1.28513					+	S1_Pel_R1_Pel;S1_Pel_R4_Pel	0.81	2.42412	D6RIA3	D6RIA3_S1707	C4orf54	GSELsPMVAEPSSK
0.601538	-0.0471018	0.188169	0.647822	-0.143008	0.449358	-1.75611	-2.50507	-2.63396	0.587191	-1.99021	0.405034	-0.08221	-2.82799	0.233296	0.339704	0.80775	0.792277	0.445208	0.410922	0.255719	0.784899	-0.0616144	0.534962	-0.136149	0.181153	0.0572418	0.548696	0.746232	0.58634	0.511215	0.330602	0.336678	0.427086	0.51466	0.45966					+	R1_Pel_S1_Pel;R4_Pel_S1_Pel;S3_Pel_S1_Pel;S4_Pel_S1_Pel	1	2.08045	E7EW31	E7EW31_S179	PROB1	GPsPAAPAQFECVEVALEEGAAPARPR
1.12967	-0.526366	0.0631864	-0.85668	-0.842798	0.545018	0.904053	0.255643	0.563214	-0.911104	0.165808	0.897329	-0.103025	-1.40146	-0.832595	-0.666445	0.541499	1.37487	-0.275729	-0.378458	1.22667	-0.356714	0.140093	0.462792	-0.150794	-0.571698	-0.808104	-1.56126	-3.1677	-0.898012	0.861845	1.83189	0.92785	0.496827	1.21187	0.708804					+	S1_Pel_R4_Pel;S4_Pel_R4_Pel	0.941	2.61379	E7EW31	E7EW31_S260	PROB1	KLsPEAPAPSSATFGSTGR
0.707581	-0.464392	0.323752	-1.64579	-1.51235	1.3824	0.395342	-0.273538	0.195192	-0.126201	-0.0327372	2.04454	-0.230952	-1.22132	-1.09517	-0.161156	-0.143366	0.868134	-0.147844	-0.72282	0.806776	0.368826	0.713396	0.765583	-0.29046	-0.414276	-0.997741	-0.636204	-3.27976	0.104971	0.806234	0.74284	0.074315	1.1016	1.01553	0.979061					+	S4_Pel_R4_Pel	0.937	1.43791	E7EW31	E7EW31_S803	PROB1	PGsPQMQASPSPGIAPK;PGsPQMQASPSPGIAPKPK;SPRPGsPQMQASPSPGIAPK;SPRPGsPQMQASPSPGIAPKPK;SPRPGsPQMQASPsPGIAPK;sPRPGsPQMQASPSPGIAPK
0.760444	0.378739	0.605423	0.245549	0.044841	0.284825	0.54959	-2.32419	0.0682786	-0.0794369	0.251833	0.254709	0.719128	0.176885	0.41352	-0.320792	0.326738	0.501114	0.743212	-0.0297961	0.553577	-0.0200529	-0.254453	0.505687	0.402086	0.328714	-2.76176	-1.74429	-3.61421	0.292236	0.46752	0.531636	0.557146	0.222817	0.757238	0.20549					+	R1_Pel_R4_Pel;S4_Pel_R4_Pel	0.929	1.60363	E7EW31	E7EW31_T776	PROB1	LVPDGDGRtSPLGGAR
-0.54651	-1.04298	-0.777334	-0.607324	-0.497929	-0.485819	0.00349677	1.52141	0.992486	0.137789	1.44528	0.999462	-0.97797	-0.180326	-0.515845	-0.740519	-0.343571	0.310557	0.0243444	0.630551	0.857392	0.424784	0.326104	0.119209	-0.926081	-1.01746	-0.763214	-0.910661	-3.18781	-0.777375	0.922623	1.80195	1.33673	0.853526	1.2123	0.378734	biological regulation;biosynthetic process;cellular biosynthetic process;cellular macromolecule biosynthetic process;cellular macromolecule metabolic process;cellular metabolic process;cellular nitrogen compound metabolic process;cellular process;macromolecule biosynthetic process;macromolecule metabolic process;metabolic process;nitrogen compound metabolic process;nucleic acid metabolic process;…	binding;DNA binding;nucleic acid binding	cell part;cytoplasm;intracellular membrane-bounded organelle;intracellular organelle;intracellular part;membrane-bounded organelle;nucleus;organelle		+	S1_Pel_R1_Pel;S1_Pel_R3_Pel;S1_Pel_R4_Pel;S3_Pel_R1_Pel;S3_Pel_R4_Pel;S4_Pel_R1_Pel;S4_Pel_R3_Pel;S4_Pel_R4_Pel	0.934	7.01191	E9PAV3	E9PAV3_S1018	NACA	GAPTPPAVTPPsPK
-0.438774	-0.999238	-1.27772	-1.06463	-0.935786	-1.09048	-0.00796402	1.85505	1.26508	-0.963577	1.65631	1.30939	-0.635007	-0.714015	-0.449863	-0.280451	-0.79928	-0.638398	-0.526791	0.731734	1.04586	0.581492	0.51525	-0.945763	-0.338922	-0.95414	-0.339236	-1.09849	-0.628837	-0.846413	0.940535	1.97184	1.61	0.8241	0.755263	0.911875	biological regulation;biosynthetic process;cellular biosynthetic process;cellular macromolecule biosynthetic process;cellular macromolecule metabolic process;cellular metabolic process;cellular nitrogen compound metabolic process;cellular process;macromolecule biosynthetic process;macromolecule metabolic process;metabolic process;nitrogen compound metabolic process;nucleic acid metabolic process;…	binding;DNA binding;nucleic acid binding	cell part;cytoplasm;intracellular membrane-bounded organelle;intracellular organelle;intracellular part;membrane-bounded organelle;nucleus;organelle		+	S1_Pel_R1_Pel;S1_Pel_R3_Pel;S1_Pel_R4_Pel;S3_Pel_R1_Pel;S4_Pel_R1_Pel;S4_Pel_R3_Pel;S4_Pel_R4_Pel	0.935	5.80579	E9PAV3	E9PAV3_S1066	NACA	GAPTTPAATLPsPK
-1.02661	-0.473766	-0.683578	-0.404509	-0.630793	-0.560314	-1.21024	2.05064	1.22094	-0.520684	1.86272	1.02084	-1.24371	-0.172483	-0.564789	-0.612253	-0.196366	0.233287	-0.672419	0.340789	0.49386	-0.0532207	-0.140402	-0.807399	-0.936103	-0.641343	-0.490782	-0.939569	-0.649245	-0.530703	0.829549	2.44807	1.77743	0.247431	1.87415	-0.238425	biological regulation;biosynthetic process;cellular biosynthetic process;cellular macromolecule biosynthetic process;cellular macromolecule metabolic process;cellular metabolic process;cellular nitrogen compound metabolic process;cellular process;macromolecule biosynthetic process;macromolecule metabolic process;metabolic process;nitrogen compound metabolic process;nucleic acid metabolic process;…	binding;DNA binding;nucleic acid binding	cell part;cytoplasm;intracellular membrane-bounded organelle;intracellular organelle;intracellular part;membrane-bounded organelle;nucleus;organelle		+	S1_Pel_R1_Pel;S1_Pel_R4_Pel;S4_Pel_R1_Pel;S4_Pel_R3_Pel;S4_Pel_R4_Pel	0.937	3.33584	E9PAV3	E9PAV3_S1135	NACA	GAPTTPAATPPsPK;GAPTtPAATPPsPK
-0.175813	-1.16294	-0.186761	-0.893764	-0.822836	-0.942477	-0.487518	1.66165	1.36369	-1.40007	1.51596	0.940334	-0.82995	-1.00005	-0.682497	0.372057	-0.581544	-0.195047	-0.730519	-0.144848	0.935944	0.447911	0.813414	-1.4377	-0.212191	-0.818253	-0.150445	-0.269582	-1.51848	-0.930131	1.11895	1.79334	1.63998	0.753722	1.21907	0.997384	biological regulation;biosynthetic process;cellular biosynthetic process;cellular macromolecule biosynthetic process;cellular macromolecule metabolic process;cellular metabolic process;cellular nitrogen compound metabolic process;cellular process;macromolecule biosynthetic process;macromolecule metabolic process;metabolic process;nitrogen compound metabolic process;nucleic acid metabolic process;…	binding;DNA binding;nucleic acid binding	cell part;cytoplasm;intracellular membrane-bounded organelle;intracellular organelle;intracellular part;membrane-bounded organelle;nucleus;organelle		+	S4_Pel_R1_Pel;S4_Pel_R3_Pel;S4_Pel_R4_Pel	0.93	3.57015	E9PAV3	E9PAV3_S1296	NACA	GAPNPAVVTPPsPK
-0.876641	0.228813	-1.53918	-1.00214	-1.99135	-0.395705	0.628884	1.32241	0.904568	0.252996	1.19446	1.13498	-1.10496	0.0932196	-1.63012	-0.436731	0.183589	0.599093	0.373089	0.5596	0.760584	0.427776	0.67983	0.39778	-0.488347	-0.962749	-0.956621	-1.5255	-1.53579	-1.25896	0.774669	1.38615	1.10863	0.746321	1.17722	0.770115	biological regulation;biosynthetic process;cellular biosynthetic process;cellular macromolecule biosynthetic process;cellular macromolecule metabolic process;cellular metabolic process;cellular nitrogen compound metabolic process;cellular process;macromolecule biosynthetic process;macromolecule metabolic process;metabolic process;nitrogen compound metabolic process;nucleic acid metabolic process;…	binding;DNA binding;nucleic acid binding	cell part;cytoplasm;intracellular membrane-bounded organelle;intracellular organelle;intracellular part;membrane-bounded organelle;nucleus;organelle		+	S1_Pel_R1_Pel;S1_Pel_R3_Pel;S1_Pel_R4_Pel;S3_Pel_R1_Pel;S3_Pel_R4_Pel;S4_Pel_R1_Pel;S4_Pel_R3_Pel;S4_Pel_R4_Pel	0.894	7.45198	E9PAV3	E9PAV3_S1623	NACA	EAPTPPAVTPPsPEK;EAPTPPAVTPPsPEKGPATPAPK
-0.965903	-0.928871	-0.362192	-1.11314	-0.0658867	-1.15417	0.987401	1.66433	-1.05216	-1.14429	-0.242716	1.68547	-0.535051	-0.249105	0.171374	-0.47173	-0.260024	-0.658078	0.983368	1.19106	1.14611	1.01168	1.29899	-1.28854	-1.46848	0.0176686	-0.375881	-0.521617	-1.24795	-0.699287	1.18566	1.56589	-0.472314	-0.274304	1.30376	1.33893	biological regulation;biosynthetic process;cellular biosynthetic process;cellular macromolecule biosynthetic process;cellular macromolecule metabolic process;cellular metabolic process;cellular nitrogen compound metabolic process;cellular process;macromolecule biosynthetic process;macromolecule metabolic process;metabolic process;nitrogen compound metabolic process;nucleic acid metabolic process;…	binding;DNA binding;nucleic acid binding	cell part;cytoplasm;intracellular membrane-bounded organelle;intracellular organelle;intracellular part;membrane-bounded organelle;nucleus;organelle		+	S3_Pel_R1_Pel;S4_Pel_R1_Pel;S4_Pel_R4_Pel	0.927	2.33786	E9PAV3	E9PAV3_S1639	NACA	GTPTsPPVTPSSLK
-0.573015	-0.846961	0.143962	-1.29802	-0.970577	-0.624875	0.618733	1.54618	1.38898	0.0166665	0.93375	1.26086	-2.0998	-0.827767	-0.493001	-0.20422	-0.581031	0.0527733	-0.99989	0.985779	1.16808	-1.40188	0.543404	0.546741	-0.225707	0.465302	-1.57945	0.336465	-1.63737	-1.04903	1.10761	1.44945	0.912587	0.829834	0.651916	0.453521	biological regulation;biosynthetic process;cellular biosynthetic process;cellular macromolecule biosynthetic process;cellular macromolecule metabolic process;cellular metabolic process;cellular nitrogen compound metabolic process;cellular process;macromolecule biosynthetic process;macromolecule metabolic process;metabolic process;nitrogen compound metabolic process;nucleic acid metabolic process;…	binding;DNA binding;nucleic acid binding	cell part;cytoplasm;intracellular membrane-bounded organelle;intracellular organelle;intracellular part;membrane-bounded organelle;nucleus;organelle		+	S1_Pel_R1_Pel;S1_Pel_R3_Pel;S1_Pel_R4_Pel;S4_Pel_R1_Pel;S4_Pel_R3_Pel;S4_Pel_R4_Pel	0.926	3.61056	E9PAV3	E9PAV3_S585	NACA	NSPSFQSTSSSPEIPLsPEATLAK
-0.138763	-0.562557	-0.899491	-1.3333	-0.78239	0.457653	-1.37203	0.631494	-0.454521	-0.390334	-1.16626	1.78396	-0.6348	-0.202755	0.795071	-0.18623	-0.983081	1.41369	0.612529	0.138223	0.173103	-0.0361142	0.0356622	0.740271	1.52464	-1.04843	0.193727	-0.936172	-1.18238	-2.16407	0.991323	2.06762	0.927781	-0.137421	1.38589	0.738465	biological regulation;biosynthetic process;cellular biosynthetic process;cellular macromolecule biosynthetic process;cellular macromolecule metabolic process;cellular metabolic process;cellular nitrogen compound metabolic process;cellular process;macromolecule biosynthetic process;macromolecule metabolic process;metabolic process;nitrogen compound metabolic process;nucleic acid metabolic process;…	binding;DNA binding;nucleic acid binding	cell part;cytoplasm;intracellular membrane-bounded organelle;intracellular organelle;intracellular part;membrane-bounded organelle;nucleus;organelle		+	S4_Pel_R4_Pel	0.833	1.32803	E9PAV3	E9PAV3_S829	NACA	GSAGPDTPIGNLSSPVsPVEASFLPENSLSFQGSK
-0.502	-1.00101	-0.718259	0.128664	-0.989152	-0.519803	0.558435	1.32363	0.81246	0.701121	1.31841	1.21739	-0.924207	-1.51726	-1.17572	-0.908234	0.153468	0.441774	0.654383	0.821677	0.822358	-0.928928	0.823405	0.634768	-1.136	-0.321007	-1.57104	-1.1711	-1.81102	-1.21861	0.996447	1.20553	0.991827	1.07964	1.12581	0.602139	biological regulation;biosynthetic process;cellular biosynthetic process;cellular macromolecule biosynthetic process;cellular macromolecule metabolic process;cellular metabolic process;cellular nitrogen compound metabolic process;cellular process;macromolecule biosynthetic process;macromolecule metabolic process;metabolic process;nitrogen compound metabolic process;nucleic acid metabolic process;…	binding;DNA binding;nucleic acid binding	cell part;cytoplasm;intracellular membrane-bounded organelle;intracellular organelle;intracellular part;membrane-bounded organelle;nucleus;organelle		+	S1_Pel_R1_Pel;S1_Pel_R3_Pel;S1_Pel_R4_Pel;S3_Pel_R1_Pel;S3_Pel_R3_Pel;S3_Pel_R4_Pel;S4_Pel_R1_Pel;S4_Pel_R3_Pel;S4_Pel_R4_Pel	0.935	7.80392	E9PAV3	E9PAV3_S860	NACA	DSPATTHSPTPPsPK;DSPATTHsPTPPsPK;DSPATtHSPTPPsPK
-0.803569	-0.66047	-0.143256	-0.318295	-0.720378	-0.540872	-0.50598	2.06217	-0.546571	-1.30474	1.65831	1.59995	-1.01974	-0.436488	-0.743054	-0.735761	-0.288138	-0.560099	-0.886513	-0.682068	1.36655	0.998422	-0.655688	-0.201807	-0.450327	-0.155467	-0.459386	0.0545366	-0.977993	-0.704389	1.27676	2.10534	1.5202	1.45749	-0.631981	1.03331	biological regulation;biosynthetic process;cellular biosynthetic process;cellular macromolecule biosynthetic process;cellular macromolecule metabolic process;cellular metabolic process;cellular nitrogen compound metabolic process;cellular process;macromolecule biosynthetic process;macromolecule metabolic process;metabolic process;nitrogen compound metabolic process;nucleic acid metabolic process;…	binding;DNA binding;nucleic acid binding	cell part;cytoplasm;intracellular membrane-bounded organelle;intracellular organelle;intracellular part;membrane-bounded organelle;nucleus;organelle		+	S4_Pel_R1_Pel;S4_Pel_R3_Pel;S4_Pel_R4_Pel	0.935	2.27392	E9PAV3	E9PAV3_S874	NACA	GAPTPSAVTPLsPK
-0.911391	-1.19568	-0.805839	-0.644395	-0.886307	-0.725899	-0.237892	1.95459	1.16311	-0.04475	1.56714	1.18998	-1.27345	-0.327738	-0.771364	-0.845206	-0.548207	0.0746208	-0.0548435	0.748137	0.671002	0.345862	0.339385	-0.191355	-0.906312	-1.11265	-0.944772	-1.32687	-0.844939	-0.779101	1.01406	2.06428	1.64269	1.00631	1.1984	0.399383	biological regulation;biosynthetic process;cellular biosynthetic process;cellular macromolecule biosynthetic process;cellular macromolecule metabolic process;cellular metabolic process;cellular nitrogen compound metabolic process;cellular process;macromolecule biosynthetic process;macromolecule metabolic process;metabolic process;nitrogen compound metabolic process;nucleic acid metabolic process;…	binding;DNA binding;nucleic acid binding	cell part;cytoplasm;intracellular membrane-bounded organelle;intracellular organelle;intracellular part;membrane-bounded organelle;nucleus;organelle		+	S1_Pel_R1_Pel;S1_Pel_R3_Pel;S1_Pel_R4_Pel;S3_Pel_R1_Pel;S3_Pel_R3_Pel;S3_Pel_R4_Pel;S4_Pel_R1_Pel;S4_Pel_R3_Pel;S4_Pel_R4_Pel;S4_Pel_S3_Pel	0.936	8.31003	E9PAV3	E9PAV3_S949	NACA	GAPTPPAATPPsPK
-0.0927017	-1.07581	0.558153	-1.00473	0.743218	-0.356133	0.53479	1.6188	-0.00773233	-0.321466	-0.197483	1.41911	-1.16728	-1.09456	-1.1288	-0.384855	0.735813	0.997364	0.679798	1.24509	1.03626	1.3195	-0.708147	0.664618	-1.16609	-0.827771	-0.437605	-0.918499	-1.41912	-1.72703	-0.434239	1.48482	1.56987	-0.450127	-0.914856	1.22783	biological regulation;biosynthetic process;cellular biosynthetic process;cellular macromolecule biosynthetic process;cellular macromolecule metabolic process;cellular metabolic process;cellular nitrogen compound metabolic process;cellular process;macromolecule biosynthetic process;macromolecule metabolic process;metabolic process;nitrogen compound metabolic process;nucleic acid metabolic process;…	binding;DNA binding;nucleic acid binding	cell part;cytoplasm;intracellular membrane-bounded organelle;intracellular organelle;intracellular part;membrane-bounded organelle;nucleus;organelle		+	S1_Pel_R4_Pel;S3_Pel_R4_Pel;S4_Pel_R4_Pel	0.907	2.05167	E9PAV3	E9PAV3_S972	NACA	WAPTPPAATPPsPK
1.60403	0.355844	0.0722371	0.325956	1.35175	1.02764	-0.27674	-1.67907	-0.944191	-1.75219	-0.870279	-0.324582	0.417803	0.192171	0.339289	1.03641	1.40812	0.700008	0.0495465	-1.69054	-0.583307	-0.346572	-1.4099	-0.281484	1.06826	-0.206991	-0.235576	0.427391	0.837382	1.3936	0.053174	-1.10267	-0.404719	-1.67159	1.87423	-0.754432	biological regulation;cell differentiation;cell proliferation;cellular component assembly;cellular component assembly at cellular level;cellular component organization;cellular component organization at cellular level;cellular component organization or biogenesis;cellular component organization or biogenesis at cellular level;cellular developmental process;cellular macromolecular complex assembly…	binding;cytoskeletal protein binding;enzyme binding;identical protein binding;protein binding;RNA polymerase binding;tau protein binding	actin cytoskeleton;axon;axon part;axon terminus;cell part;cell projection;cell projection part;cerebellar mossy fiber;clathrin-coated vesicle;coated vesicle;contractile fiber part;cytoplasm;cytoplasmic membrane-bounded vesicle;cytoplasmic part;cytoplasmic vesicle;cytoskeleton;I band;initial segment;intracellular membrane-bounded organelle;intracellular non-membrane-bounded organelle;intracellular…		+	R1_Pel_S1_Pel;R1_Pel_S3_Pel;R3_Pel_S1_Pel;R3_Pel_S3_Pel;R4_Pel_S1_Pel	0.941	3.31242	O00499	O00499_S303	BIN1	GNKSPsPPDGsPAATPEIR;GNKsPSPPDGsPAATPEIR;GNKsPsPPDGsPAATPEIR;SPSPPDGsPAATPEIR;SPSPPDGsPAAtPEIR;SPsPPDGsPAATPEIR;sPSPPDGsPAATPEIR
-0.519401	-1.09622	-0.603897	-0.0381361	-0.914197	-0.188196	-0.268436	1.24399	1.52823	-0.619797	1.47663	0.0793874	-1.2929	-0.898052	-0.509739	-0.615969	0.0738125	0.439564	-0.738058	-0.91128	-0.637059	-0.111014	1.47245	-0.830393	-0.587488	-0.322344	-0.926009	-0.602815	-1.09482	-1.01342	1.20206	1.40893	1.63248	1.61416	1.88749	1.28046	biological regulation;cell differentiation;cell proliferation;cellular component assembly;cellular component assembly at cellular level;cellular component organization;cellular component organization at cellular level;cellular component organization or biogenesis;cellular component organization or biogenesis at cellular level;cellular developmental process;cellular macromolecular complex assembly…	binding;cytoskeletal protein binding;enzyme binding;identical protein binding;protein binding;RNA polymerase binding;tau protein binding	actin cytoskeleton;axon;axon part;axon terminus;cell part;cell projection;cell projection part;cerebellar mossy fiber;clathrin-coated vesicle;coated vesicle;contractile fiber part;cytoplasm;cytoplasmic membrane-bounded vesicle;cytoplasmic part;cytoplasmic vesicle;cytoskeleton;I band;initial segment;intracellular membrane-bounded organelle;intracellular non-membrane-bounded organelle;intracellular…		+	S1_Pel_R1_Pel;S1_Pel_R4_Pel;S4_Pel_R1_Pel;S4_Pel_R3_Pel;S4_Pel_R4_Pel;S4_Pel_S3_Pel	0.941	5.38001	O00499	O00499_T323	BIN1	VNHEPEPAGGAtPGATLPK
-0.183265	-0.741883	-0.405412	-0.366707	-0.332816	-0.593537	0.65485	0.908013	0.198386	-0.533217	1.55187	2.15491	-0.693126	-0.954906	-1.38013	-0.734034	-0.284801	-0.355098	0.0411243	0.677199	0.298842	0.16775	0.900615	1.05248	-0.524213	-0.922308	-1.48649	-1.20758	-1.5624	-0.95233	0.0680861	1.89581	1.87347	0.754048	-0.528445	1.54525	cellular component organization;cellular component organization at cellular level;cellular component organization or biogenesis;cellular component organization or biogenesis at cellular level;cellular process;cytoskeleton organization;intermediate filament cytoskeleton organization;intermediate filament-based process;organelle organization	binding;cytoskeletal protein binding;intermediate filament binding;protein binding;protein complex binding;structural constituent of cytoskeleton;structural constituent of muscle;structural molecule activity;vinculin binding	adherens junction;anchoring junction;cell junction;cell part;contractile fiber part;costamere;cytoplasmic part;cytoskeletal part;cytoskeleton;intermediate filament;intermediate filament cytoskeleton;intracellular non-membrane-bounded organelle;intracellular organelle;intracellular organelle part;intracellular part;macromolecular complex;membrane;neurofilament cytoskeleton;non-membrane-bounded org…		+	S1_Pel_R1_Pel;S1_Pel_R3_Pel;S1_Pel_R4_Pel;S3_Pel_R3_Pel;S3_Pel_R4_Pel;S4_Pel_R1_Pel;S4_Pel_R3_Pel;S4_Pel_R4_Pel	1	5.3807	O15061	O15061_S1044	SYNM	QRsPAPGSPDEEGGAEAPAAGIR;QRsPAPGsPDEEGGAEAPAAGIR;sPAPGSPDEEGGAEAPAAGIR;sPAPGsPDEEGGAEAPAAGIR
0.0695095	-1.71368	-1.44652	-1.45747	0.36371	0.403457	0.650521	0.784248	0.637709	0.422419	0.924256	1.05733	-1.67811	-1.86541	-0.154119	0.382803	-1.73302	0.44759	0.504215	0.643522	0.661281	0.545523	0.776206	0.724866	-1.51206	-1.40867	0.0938636	-1.89574	-0.129722	0.319082	0.594784	0.992911	0.95029	0.711919	0.420387	0.912144	cellular component organization;cellular component organization at cellular level;cellular component organization or biogenesis;cellular component organization or biogenesis at cellular level;cellular process;cytoskeleton organization;intermediate filament cytoskeleton organization;intermediate filament-based process;organelle organization	binding;cytoskeletal protein binding;intermediate filament binding;protein binding;protein complex binding;structural constituent of cytoskeleton;structural constituent of muscle;structural molecule activity;vinculin binding	adherens junction;anchoring junction;cell junction;cell part;contractile fiber part;costamere;cytoplasmic part;cytoskeletal part;cytoskeleton;intermediate filament;intermediate filament cytoskeleton;intracellular non-membrane-bounded organelle;intracellular organelle;intracellular organelle part;intracellular part;macromolecular complex;membrane;neurofilament cytoskeleton;non-membrane-bounded org…		+	S1_Pel_R1_Pel;S1_Pel_R3_Pel;S1_Pel_R4_Pel;S3_Pel_R3_Pel;S3_Pel_R4_Pel;S4_Pel_R1_Pel;S4_Pel_R3_Pel;S4_Pel_R4_Pel	1	3.64144	O15061	O15061_S1049	SYNM	QRsPAPGsPDEEGGAEAPAAGIR;SPAPGsPDEEGGAEAPAAGIR;sPAPGsPDEEGGAEAPAAGIR
-1.5797	-1.86768	0.0152809	-0.199975	-0.18249	-0.102056	0.346458	0.823353	0.626705	0.617401	0.908737	0.936026	-1.44112	0.782406	-0.233846	-1.2596	0.0918202	0.497702	0.496182	0.814682	0.938995	0.745501	0.584844	0.614807	-1.53749	-1.85611	-1.7042	-0.332078	-2.12529	-0.150491	0.900003	1.31015	0.819565	0.784751	0.00706313	0.909692	cellular component organization;cellular component organization at cellular level;cellular component organization or biogenesis;cellular component organization or biogenesis at cellular level;cellular process;cytoskeleton organization;intermediate filament cytoskeleton organization;intermediate filament-based process;organelle organization	binding;cytoskeletal protein binding;intermediate filament binding;protein binding;protein complex binding;structural constituent of cytoskeleton;structural constituent of muscle;structural molecule activity;vinculin binding	adherens junction;anchoring junction;cell junction;cell part;contractile fiber part;costamere;cytoplasmic part;cytoskeletal part;cytoskeleton;intermediate filament;intermediate filament cytoskeleton;intracellular non-membrane-bounded organelle;intracellular organelle;intracellular organelle part;intracellular part;macromolecular complex;membrane;neurofilament cytoskeleton;non-membrane-bounded org…		+	S1_Pel_R1_Pel;S1_Pel_R4_Pel;S3_Pel_R1_Pel;S3_Pel_R4_Pel;S4_Pel_R1_Pel;S4_Pel_R4_Pel	0.933	5.30327	O15061	O15061_S1107	SYNM	TPQGPVSATVEVSsPTGFAQSQVLEDVSQAAR
-0.00920193	-0.364126	-1.38704	-0.241413	-1.21931	-0.32929	1.04265	1.26186	0.732997	0.281301	1.17511	1.92828	-0.865115	-0.748152	-1.65437	0.391299	-1.22711	-0.704569	0.573472	0.922486	0.510218	0.789224	0.918842	0.805635	-0.999708	-1.11832	-0.997145	-0.888493	-1.44589	-0.582258	0.347842	1.14262	1.6161	-1.02446	0.11119	1.25486	cellular component organization;cellular component organization at cellular level;cellular component organization or biogenesis;cellular component organization or biogenesis at cellular level;cellular process;cytoskeleton organization;intermediate filament cytoskeleton organization;intermediate filament-based process;organelle organization	binding;cytoskeletal protein binding;intermediate filament binding;protein binding;protein complex binding;structural constituent of cytoskeleton;structural constituent of muscle;structural molecule activity;vinculin binding	adherens junction;anchoring junction;cell junction;cell part;contractile fiber part;costamere;cytoplasmic part;cytoskeletal part;cytoskeleton;intermediate filament;intermediate filament cytoskeleton;intracellular non-membrane-bounded organelle;intracellular organelle;intracellular organelle part;intracellular part;macromolecular complex;membrane;neurofilament cytoskeleton;non-membrane-bounded org…		+	S1_Pel_R1_Pel;S1_Pel_R3_Pel;S1_Pel_R4_Pel;S3_Pel_R1_Pel;S3_Pel_R3_Pel;S3_Pel_R4_Pel;S4_Pel_R1_Pel;S4_Pel_R3_Pel;S4_Pel_R4_Pel	0.922	6.23485	O15061	O15061_S653	SYNM	QFTQsPETEASADSFPDTK
-0.607174	-0.932487	-1.42444	-0.0796646	-0.229186	-0.823087	-0.487228	1.27262	1.45589	0.49844	1.52131	1.24254	-1.01221	0.239139	-0.58985	-0.554768	-0.939016	-0.741009	-0.792379	0.580439	1.15638	0.670719	0.603494	0.14538	-0.78619	-0.770138	-1.04295	-1.15551	-1.15075	-0.975866	0.759639	1.99074	2.04019	0.769459	-0.760358	0.907878	cellular component organization;cellular component organization at cellular level;cellular component organization or biogenesis;cellular component organization or biogenesis at cellular level;cellular process;cytoskeleton organization;intermediate filament cytoskeleton organization;intermediate filament-based process;organelle organization	binding;cytoskeletal protein binding;intermediate filament binding;protein binding;protein complex binding;structural constituent of cytoskeleton;structural constituent of muscle;structural molecule activity;vinculin binding	adherens junction;anchoring junction;cell junction;cell part;contractile fiber part;costamere;cytoplasmic part;cytoskeletal part;cytoskeleton;intermediate filament;intermediate filament cytoskeleton;intracellular non-membrane-bounded organelle;intracellular organelle;intracellular organelle part;intracellular part;macromolecular complex;membrane;neurofilament cytoskeleton;non-membrane-bounded org…		+	S1_Pel_R1_Pel;S1_Pel_R3_Pel;S1_Pel_R4_Pel;S3_Pel_R4_Pel;S4_Pel_R1_Pel;S4_Pel_R3_Pel;S4_Pel_R4_Pel	1	5.09892	O15061	O15061_S777	SYNM	VEEVEDVsPGPWGLVK
-0.0395091	-0.338681	-0.527626	-0.617994	-0.992854	-0.708243	1.14977	1.12245	1.25548	0.131032	0.537257	0.578839	-0.456452	0.126751	-0.693704	-1.81112	-0.738894	-0.647793	0.842291	1.12635	1.22109	0.63797	0.594667	0.682798	-0.150761	-0.566435	-0.752533	-1.93622	-2.81769	-0.629449	0.641206	1.42894	1.55194	0.502657	-0.11517	0.409629	cellular component organization;cellular component organization at cellular level;cellular component organization or biogenesis;cellular component organization or biogenesis at cellular level;cellular process;cytoskeleton organization;intermediate filament cytoskeleton organization;intermediate filament-based process;organelle organization	binding;cytoskeletal protein binding;intermediate filament binding;protein binding;protein complex binding;structural constituent of cytoskeleton;structural constituent of muscle;structural molecule activity;vinculin binding	adherens junction;anchoring junction;cell junction;cell part;contractile fiber part;costamere;cytoplasmic part;cytoskeletal part;cytoskeleton;intermediate filament;intermediate filament cytoskeleton;intracellular non-membrane-bounded organelle;intracellular organelle;intracellular organelle part;intracellular part;macromolecular complex;membrane;neurofilament cytoskeleton;non-membrane-bounded org…		+	S1_Pel_R1_Pel;S1_Pel_R3_Pel;S1_Pel_R4_Pel;S3_Pel_R1_Pel;S3_Pel_R3_Pel;S3_Pel_R4_Pel;S4_Pel_R1_Pel;S4_Pel_R3_Pel;S4_Pel_R4_Pel	0.94	6.03479	O15061	O15061_T598	SYNM	GLQtPVKDAGGGTGR
0.342029	-0.461244	0.788488	0.549997	0.342516	1.53493	-1.85274	-2.12314	-1.29605	-0.828016	-0.834408	-0.826608	0.592763	-0.673103	0.0374717	0.899729	1.02076	1.69986	0.205761	-1.02888	-0.714441	-0.425835	-2.08082	-0.872797	0.11938	0.759225	0.882098	1.26602	1.18211	1.37293	0.151327	0.362481	-0.00710725	0.442199	0.191395	-0.718302	actin cytoskeleton organization;actin filament organization;actin filament-based movement;actin filament-based process;actin-mediated cell contraction;actin-myosin filament sliding;actomyosin structure organization;adult heart development;anatomical structure development;anatomical structure formation involved in morphogenesis;anatomical structure morphogenesis;anterior/posterior pattern specific…	binding;binding, bridging;cytoskeletal protein binding;FATZ binding;ion channel binding;protein binding;protein binding, bridging;protein domain specific binding;structural constituent of muscle;structural molecule activity;titin binding;titin Z domain binding	cell part;contractile fiber part;cytoplasmic part;cytosol;I band;intracellular part;organelle part;Z disc		+	R1_Pel_S1_Pel;R1_Pel_S3_Pel;R3_Pel_S1_Pel;R3_Pel_S3_Pel;R4_Pel_S1_Pel;R4_Pel_S3_Pel;S4_Pel_S1_Pel	1	5.54461	O15273	O15273_T109	TCAP	EDtPIQLQELLALETALGGQCVDR;EEREDtPIQLQELLALETALGGQCVDR;EEREDtPIQLQELLALEtALGGQCVDRQEVAEItK;MGATKEEREDtPIQLQELLALETALGGQCVDR
1.47013	0.336765	0.460199	-0.436616	-0.267697	0.331831	0.277702	0.0318072	0.748887	-0.252645	-0.53394	0.273487	-0.384938	0.162019	0.12134	0.778273	-0.0482098	1.82156	0.502024	-0.297449	0.532594	-0.609401	-0.208668	-0.265616	0.501256	-0.11847	-2.74119	-0.70462	-3.72187	-0.39766	0.876088	1.15849	0.383803	-0.386421	1.00236	-0.395197	biological regulation;cell migration;cell motility;cell proliferation;cellular component movement;cellular component organization;cellular component organization or biogenesis;cellular process;locomotion;macromolecule metabolic process;metabolic process;neuromuscular junction development;positive regulation of biological process;positive regulation of catabolic process;positive regulation of cell…	binding;catalytic activity;cation binding;endopeptidase activity;epidermal growth factor binding;growth factor binding;hormone binding;hydrolase activity;ion binding;metal ion binding;metalloendopeptidase activity;metallopeptidase activity;peptidase activity;peptidase activity, acting on L-amino acid peptides;protein binding	cell part;cell surface;cytoplasmic part;cytosol;intracellular part		+	R3_Pel_R4_Pel;S4_Pel_R4_Pel	0.936	1.53073	O43847	O43847_S94	NRDC	RGsLSNAGDPEIVK
-0.251128	-0.733525	-0.651299	-0.682645	-0.893274	-0.149547	-0.930803	1.62504	1.41654	-0.771806	2.29605	1.85522	-1.07718	-1.33399	-0.569401	-0.41068	0.202749	0.518707	-1.49487	0.598115	0.538177	0.0488107	0.10198	-0.404134	-0.766657	-1.00444	-0.17656	-0.417857	-0.825213	-0.535883	-0.0985814	2.17024	1.70082	0.715361	0.411194	-0.0195427	actin cytoskeleton organization;actin filament-based process;actomyosin structure organization;cellular component organization;cellular component organization at cellular level;cellular component organization or biogenesis;cellular component organization or biogenesis at cellular level;cellular process;cytoskeleton organization;organelle organization;sarcomere organization	binding;cation binding;cytoskeletal protein binding;ion binding;metal ion binding;protein binding;transition metal ion binding;zinc ion binding	cell part;cell projection;contractile fiber part;cytoplasmic part;cytoskeleton;intracellular non-membrane-bounded organelle;intracellular organelle;intracellular part;non-membrane-bounded organelle;organelle;organelle part;perinuclear region of cytoplasm;pseudopodium;Z disc		+	S1_Pel_R1_Pel;S1_Pel_R4_Pel	0.937	2.29349	O75112	O75112_S243	LDB3	DLAVDSAsPVYQAVIK
-2.92014	-0.189117	-0.324083	-0.403407	0.0316001	1.1425	0.156781	0.486877	0.26292	0.294541	0.887646	0.792332	-0.659182	-0.174491	-0.61348	-0.255019	0.124431	0.520777	-0.00468292	0.0793215	0.226187	0.165511	0.548007	0.239333	-0.250308	-0.359986	-0.360141	-0.388567	-3.90214	0.0800922	0.674986	0.730991	0.790692	0.533909	1.94413	0.0911933	anatomical structure morphogenesis;biological regulation;cellular macromolecule metabolic process;cellular metabolic process;cellular nitrogen compound metabolic process;cellular process;cellular protein metabolic process;cellular response to chemical stimulus;cellular response to dsRNA;cellular response to organic substance;cellular response to oxidative stress;cellular response to stimulus;cell…	binding;double-stranded RNA binding;enzyme activator activity;enzyme binding;enzyme regulator activity;identical protein binding;nucleic acid binding;protein binding;protein dimerization activity;protein homodimerization activity;RNA binding	cell part;cytoplasm;cytoplasmic part;cytosol;intracellular organelle part;intracellular part;membrane;nuclear part;nucleoplasm;organelle part;perinuclear region of cytoplasm		+	S4_Pel_R4_Pel	0.94	1.49545	O75569	O75569_S18	PRKRA	AEAPPLEREDsGTFSLGK;EDsGTFSLGK
1.24718	0.813505	0.684672	0.457914	0.626061	1.49283	-0.557027	-2.33084	-0.469851	-0.710396	-2.52153	-0.298716	0.68393	0.122244	0.852987	0.372702	1.08476	1.31732	-0.343504	-0.535654	-0.328448	-0.4499	-0.421143	-0.186703	1.12325	0.743789	0.606556	0.0623228	-0.61657	0.815209	-0.310497	-0.900657	-0.499542	-0.245641	1.03847	-2.41908	cellular macromolecule metabolic process;cellular metabolic process;cellular process;cellular protein metabolic process;establishment of localization;establishment of localization in cell;establishment of protein localization;establishment of protein localization in mitochondrion;establishment of protein localization to organelle;intracellular protein transport;intracellular transport;macromolecu…	macromolecule transmembrane transporter activity;protein transmembrane transporter activity;protein transporter activity;substrate-specific transmembrane transporter activity;substrate-specific transporter activity;transmembrane transporter activity;transporter activity	cell part;cytoplasmic part;extracellular membrane-bounded organelle;extracellular organelle;extracellular region part;extracellular vesicular exosome;integral to membrane;intracellular membrane-bounded organelle;intracellular organelle;intracellular organelle part;intracellular part;intrinsic to membrane;macromolecular complex;membrane;membrane part;membrane-bounded organelle;membrane-bounded ves…		+	R1_Pel_S1_Pel;R1_Pel_S3_Pel;R1_Pel_S4_Pel;R3_Pel_S1_Pel;R3_Pel_S4_Pel;R4_Pel_S1_Pel	0.933	4.10645	O94826	O94826_S91	TOMM70	AsPAPGSGHPEGPGAHLDMNSLDR
0.380295	-1.38867	0.862647	0.969633	-1.16892	-1.22148	0.696217	0.666549	0.616836	0.694394	0.355155	0.758695	-1.18568	0.769952	0.590648	-0.984998	0.632671	0.851706	0.440919	-1.67926	0.761387	0.61925	0.418285	0.393111	-0.634849	0.493679	-1.87188	-1.41155	-1.85419	-1.4327	-1.35075	1.07521	0.952632	0.82626	0.758644	0.600164	anatomical structure development;biological regulation;cellular component organization;cellular component organization at cellular level;cellular component organization or biogenesis;cellular component organization or biogenesis at cellular level;cellular process;cytoskeleton organization;developmental process;muscle tissue development;organelle organization;positive regulation of biological proc…	actin binding;actin filament binding;binding;cytoskeletal protein binding;protein binding	actin cytoskeleton;adherens junction;anchoring junction;cell division site part;cell junction;cell part;cell projection;cell-substrate adherens junction;cell-substrate junction;cleavage furrow;contractile fiber part;costamere;cytoplasm;cytoplasmic part;cytoskeletal part;cytoskeleton;focal adhesion;intracellular membrane-bounded organelle;intracellular non-membrane-bounded organelle;intracellular …		+	S1_Pel_R4_Pel;S4_Pel_R4_Pel	0.938	1.64095	O95425	O95425_S245	SVIL	DSSFTEVPRsPK
0.450297	0.418786	0.413999	0.648874	0.603656	0.500261	-0.649295	-1.23509	-0.449811	0.157626	-0.27183	-5.00379	0.00237882	-0.359404	0.325436	0.614826	0.695037	1.1249	-0.235128	-0.0820204	0.24852	0.209089	0.0107692	0.100351	0.115408	0.0743082	0.310821	0.431005	-0.915169	0.608021	-0.184052	-0.290014	-0.0290992	0.458628	1.31668	-0.134979	anatomical structure development;biological regulation;cellular component organization;cellular component organization at cellular level;cellular component organization or biogenesis;cellular component organization or biogenesis at cellular level;cellular process;cytoskeleton organization;developmental process;muscle tissue development;organelle organization;positive regulation of biological proc…	actin binding;actin filament binding;binding;cytoskeletal protein binding;protein binding	actin cytoskeleton;adherens junction;anchoring junction;cell division site part;cell junction;cell part;cell projection;cell-substrate adherens junction;cell-substrate junction;cleavage furrow;contractile fiber part;costamere;cytoplasm;cytoplasmic part;cytoskeletal part;cytoskeleton;focal adhesion;intracellular membrane-bounded organelle;intracellular non-membrane-bounded organelle;intracellular …		+	R1_Pel_S1_Pel;R3_Pel_S1_Pel	0.946	1.67547	O95425	O95425_S261	SVIL	sPSFGDPQLSPEAR;sPSFGDPQLSPEARPSTGKPK;sPSFGDPQLsPEAR
-0.754406	-0.249471	-1.16274	-0.304755	-1.60932	-0.503312	1.17891	1.0104	1.04302	0.436456	1.02601	1.32901	-1.64093	-0.00184035	-1.00686	-1.37757	-0.29613	0.881871	0.523263	0.824785	0.899784	0.596696	0.732368	0.723169	-1.30177	-0.79137	-1.20553	-0.535578	-1.55098	-1.64034	0.722651	1.04698	1.38901	0.70121	0.0146787	0.852638	anatomical structure development;biological regulation;cellular component organization;cellular component organization at cellular level;cellular component organization or biogenesis;cellular component organization or biogenesis at cellular level;cellular process;cytoskeleton organization;developmental process;muscle tissue development;organelle organization;positive regulation of biological proc…	actin binding;actin filament binding;binding;cytoskeletal protein binding;protein binding	actin cytoskeleton;adherens junction;anchoring junction;cell division site part;cell junction;cell part;cell projection;cell-substrate adherens junction;cell-substrate junction;cleavage furrow;contractile fiber part;costamere;cytoplasm;cytoplasmic part;cytoskeletal part;cytoskeleton;focal adhesion;intracellular membrane-bounded organelle;intracellular non-membrane-bounded organelle;intracellular …		+	S1_Pel_R1_Pel;S1_Pel_R3_Pel;S1_Pel_R4_Pel;S3_Pel_R1_Pel;S3_Pel_R3_Pel;S3_Pel_R4_Pel;S4_Pel_R1_Pel;S4_Pel_R3_Pel;S4_Pel_R4_Pel	0.942	7.73753	O95425	O95425_S270	SVIL	SPSFGDPQLsPEAR;SPSFGDPQLsPEARPSTGKPK;sPSFGDPQLsPEAR
1.7874	1.2979	1.00945	1.55506	0.230526	0.259299	-0.229076	-1.30739	-1.12071	-0.900001	-0.912608	-0.898507	0.298439	-1.77482	0.712525	0.612249	0.920655	1.52804	-0.164018	-1.50956	-0.745736	-0.134965	-0.31327	0.515371	0.559864	0.736483	0.450066	0.809473	-1.93494	1.59502	-0.792838	-1.10575	-0.662815	-0.217665	0.236395	-0.389543	anatomical structure development;biological regulation;cellular component organization;cellular component organization at cellular level;cellular component organization or biogenesis;cellular component organization or biogenesis at cellular level;cellular process;cytoskeleton organization;developmental process;muscle tissue development;organelle organization;positive regulation of biological proc…	actin binding;actin filament binding;binding;cytoskeletal protein binding;protein binding	actin cytoskeleton;adherens junction;anchoring junction;cell division site part;cell junction;cell part;cell projection;cell-substrate adherens junction;cell-substrate junction;cleavage furrow;contractile fiber part;costamere;cytoplasm;cytoplasmic part;cytoskeletal part;cytoskeleton;focal adhesion;intracellular membrane-bounded organelle;intracellular non-membrane-bounded organelle;intracellular …		+	R1_Pel_S1_Pel;R1_Pel_S4_Pel	0.94	2.49217	O95425	O95425_S319	SVIL	EESARNsPELASESVTQR;NsPELASESVTQR
-1.10881	-0.350452	-1.10951	-0.479844	-0.840145	-0.91011	0.310857	1.03477	0.842946	0.653347	1.18672	1.22852	-1.45941	-0.870595	-0.871533	-1.11223	0.0677736	0.905352	0.114229	0.211139	0.196199	0.664541	1.24423	0.524877	-1.26499	-1.23889	-1.11806	-0.449355	-2.26521	-0.0991431	0.718869	1.64331	0.922636	0.587708	1.48728	1.00298	anatomical structure development;biological regulation;cellular component organization;cellular component organization at cellular level;cellular component organization or biogenesis;cellular component organization or biogenesis at cellular level;cellular process;cytoskeleton organization;developmental process;muscle tissue development;organelle organization;positive regulation of biological proc…	actin binding;actin filament binding;binding;cytoskeletal protein binding;protein binding	actin cytoskeleton;adherens junction;anchoring junction;cell division site part;cell junction;cell part;cell projection;cell-substrate adherens junction;cell-substrate junction;cleavage furrow;contractile fiber part;costamere;cytoplasm;cytoplasmic part;cytoskeletal part;cytoskeleton;focal adhesion;intracellular membrane-bounded organelle;intracellular non-membrane-bounded organelle;intracellular …		+	S1_Pel_R1_Pel;S1_Pel_R3_Pel;S1_Pel_R4_Pel;S3_Pel_R1_Pel;S3_Pel_R3_Pel;S3_Pel_R4_Pel;S4_Pel_R1_Pel;S4_Pel_R3_Pel;S4_Pel_R4_Pel	0.945	6.93486	O95425	O95425_S769	SVIL	LPsPTVAR
1.55418	0.483253	-0.813091	-1.27213	0.153776	1.55234	-1.31097	-0.981689	-1.00485	-0.904423	-1.22029	0.225745	1.15205	0.612379	0.480509	1.40804	0.326963	1.86005	-1.2858	-0.294933	-0.773043	-1.51857	-0.389488	0.339403	1.22083	0.877927	0.81946	0.925482	-1.36477	-1.40678	0.710746	-0.246299	0.55527	0.103185	0.219819	-0.79427		binding;enzyme binding;kinase binding;lipid binding;phosphatidylserine binding;phospholipid binding;protein binding;protein kinase binding;protein kinase C binding	caveola;cell part;cytoplasm;cytoplasmic part;cytosol;intracellular part;membrane part;membrane raft;plasma membrane part		+	R3_Pel_S1_Pel;R3_Pel_S3_Pel	0.939	2.02625	O95810	O95810_S293	CAVIN2	SSPFKVsPLTFGR;VsPLTFGR
0.865229	0.542736	0.632556	0.330338	0.400618	0.579675	-0.300977	-1.09134	-4.78409	-0.31533	-0.271656	-0.00945797	0.451657	0.0942472	0.316867	0.234713	0.829864	1.183	-0.0225053	-0.534627	-0.0527721	0.181975	-0.365406	0.176186	0.39909	0.739715	0.555086	0.192016	-0.82639	0.369925	-0.125684	-0.829708	-0.190879	-0.391117	1.60527	-0.568822	anatomical structure development;biological regulation;brain development;cellular macromolecule metabolic process;cellular metabolic process;cellular process;cellular protein metabolic process;cellular response to abiotic stimulus;cellular response to external stimulus;cellular response to heat;cellular response to mechanical stimulus;cellular response to stimulus;cellular response to stress;deve…		cell part;cell projection;contractile fiber part;cytoplasm;cytoplasmic part;cytosol;intracellular part;membrane;neuron projection;organelle part;plasma membrane;Z disc		+	R1_Pel_S1_Pel;R3_Pel_S1_Pel	0.937	1.56483	O95817	O95817_S173	BAG3	SQsPAASDCSSSSSSASLPSSGR
-0.818721	0.0423756	-1.6273	0.24386	0.34813	0.312227	0.615006	1.26035	1.16672	0.599231	1.28925	1.08472	-0.835149	0.647498	-1.54486	0.245162	-0.632725	0.967429	0.658345	0.912384	-1.15648	0.628845	0.857012	-1.16646	-1.34885	-1.0233	-0.995338	-0.571226	-1.46739	-1.04514	-0.859195	1.39563	-1.17417	0.660787	1.50798	0.823345	anatomical structure development;biological regulation;brain development;cellular macromolecule metabolic process;cellular metabolic process;cellular process;cellular protein metabolic process;cellular response to abiotic stimulus;cellular response to external stimulus;cellular response to heat;cellular response to mechanical stimulus;cellular response to stimulus;cellular response to stress;deve…		cell part;cell projection;contractile fiber part;cytoplasm;cytoplasmic part;cytosol;intracellular part;membrane;neuron projection;organelle part;plasma membrane;Z disc		+	S1_Pel_R4_Pel;S4_Pel_R4_Pel	0.895	2.33164	O95817	O95817_S385	BAG3	VPPAPVPCPPPSPGPSAVPsSPK;VPPAPVPCPPPsPGPSAVPsSPK
-1.22495	0.180232	-0.0846802	-1.83631	-0.159474	-1.54929	0.494607	1.07974	1.13965	0.130655	1.03829	0.9026	-0.0133853	0.207345	0.0500109	-2.07723	-0.0710906	0.62868	0.0739548	0.583794	0.588176	-1.71817	0.633856	0.242605	-0.0677157	-0.000654313	0.0492337	-1.75936	-2.46513	-0.197644	0.853089	1.12812	1.11205	0.402344	1.08181	0.624236	anatomical structure development;biological regulation;brain development;cellular macromolecule metabolic process;cellular metabolic process;cellular process;cellular protein metabolic process;cellular response to abiotic stimulus;cellular response to external stimulus;cellular response to heat;cellular response to mechanical stimulus;cellular response to stimulus;cellular response to stress;deve…		cell part;cell projection;contractile fiber part;cytoplasm;cytoplasmic part;cytosol;intracellular part;membrane;neuron projection;organelle part;plasma membrane;Z disc		+	S1_Pel_R1_Pel;S1_Pel_R4_Pel;S4_Pel_R1_Pel;S4_Pel_R4_Pel	0.933	2.61467	O95817	O95817_S386	BAG3	VPPAPVPCPPPSPGPSAVPSsPK;VPPAPVPCPPPsPGPSAVPSsPK
-0.906743	-0.642107	-0.845535	-1.46199	-0.860236	-0.707105	0.87747	1.31808	1.04758	0.713845	1.56271	1.50496	-0.917281	-0.549379	-0.92223	-1.07749	-0.729467	-0.697075	0.762418	1.12923	0.743394	0.520665	0.964299	0.807723	-0.902722	-1.03131	-1.01959	-1.39147	-1.07839	-1.04231	0.845014	1.47443	0.802121	0.848672	-0.158232	1.01805	aging;anatomical structure development;apoptosis;apoptosis involved in morphogenesis;biological regulation;cell death;cellular component assembly;cellular component assembly at cellular level;cellular component organization;cellular component organization at cellular level;cellular component organization or biogenesis;cellular component organization or biogenesis at cellular level;cellular develo…	binding;cation binding;identical protein binding;ion binding;metal ion binding;protein binding;protein dimerization activity;protein homodimerization activity;structural constituent of eye lens;structural molecule activity;unfolded protein binding	actin filament bundle;cell part;cell surface;contractile fiber part;cytoplasm;cytoplasmic part;cytoskeletal part;cytoskeleton;cytosol;extracellular membrane-bounded organelle;extracellular organelle;extracellular region part;extracellular vesicular exosome;Golgi apparatus;intracellular membrane-bounded organelle;intracellular non-membrane-bounded organelle;intracellular organelle;intracellular or…	Protein processing in endoplasmic reticulum	+	S1_Pel_R1_Pel;S1_Pel_R3_Pel;S1_Pel_R4_Pel;S3_Pel_R1_Pel;S3_Pel_R3_Pel;S3_Pel_R4_Pel;S4_Pel_R1_Pel;S4_Pel_R3_Pel;S4_Pel_R4_Pel	0.94	14.41	P02511	P02511_S59	CRYAB	APsWFDTGLSEMR
-1.21224	-1.04203	-0.848665	-1.04871	-0.851624	-0.537615	0.747398	1.25182	1.13959	0.742339	1.52565	1.43324	-0.963717	-0.598447	-0.955107	-1.2315	-0.600544	-0.727536	0.669951	1.17806	0.813458	0.636883	0.886943	0.728391	-0.956732	-1.01522	-1.12506	-1.35116	-0.875537	-0.887851	0.846278	1.458	1.03038	0.691654	-0.146786	1.19603	anatomical structure homeostasis;biological adhesion;biological regulation;cell adhesion;cell surface receptor linked signaling pathway;cell-cell adhesion;cellular component movement;cellular process;cellular response to chemical stimulus;cellular response to growth factor stimulus;cellular response to organic substance;cellular response to stimulus;cellular response to vascular endothelial growt…	binding;enzyme binding;enzyme inhibitor activity;enzyme regulator activity;identical protein binding;kinase binding;kinase inhibitor activity;kinase regulator activity;protein binding;protein kinase binding;protein kinase C binding;protein kinase C inhibitor activity;protein kinase inhibitor activity;protein kinase regulator activity;protein serine/threonine kinase inhibitor activity;small conjug…	adherens junction;anchoring junction;cell junction;cell part;cell-substrate adherens junction;cell-substrate junction;contractile fiber part;cytoplasm;cytoplasmic part;cytoskeletal part;cytoskeleton;cytosol;extracellular membrane-bounded organelle;extracellular organelle;extracellular region part;extracellular space;extracellular vesicular exosome;focal adhesion;intracellular membrane-bounded org…	Amoebiasis;MAPK signaling pathway;VEGF signaling pathway	+	S1_Pel_R1_Pel;S1_Pel_R3_Pel;S1_Pel_R4_Pel;S3_Pel_R1_Pel;S3_Pel_R3_Pel;S3_Pel_R4_Pel;S4_Pel_R1_Pel;S4_Pel_R3_Pel;S4_Pel_R4_Pel	1	14.2775	P04792	P04792_S15	HSPB1	GPsWDPFR;GPsWDPFRDWYPHSR
-0.409928	-1.85522	-0.304317	-0.96121	-0.12206	-0.781492	1.04293	1.1255	0.947754	0.681626	2.11367	1.60759	-0.900658	-0.896119	-0.907957	-0.755714	-0.557941	-0.084536	0.787826	0.711348	0.731821	0.288677	0.839912	0.434118	-1.42715	-0.937249	-0.585144	-1.18549	-2.17606	-0.447525	0.387873	1.26117	0.427557	0.707025	0.232546	0.966848	anatomical structure homeostasis;biological adhesion;biological regulation;cell adhesion;cell surface receptor linked signaling pathway;cell-cell adhesion;cellular component movement;cellular process;cellular response to chemical stimulus;cellular response to growth factor stimulus;cellular response to organic substance;cellular response to stimulus;cellular response to vascular endothelial growt…	binding;enzyme binding;enzyme inhibitor activity;enzyme regulator activity;identical protein binding;kinase binding;kinase inhibitor activity;kinase regulator activity;protein binding;protein kinase binding;protein kinase C binding;protein kinase C inhibitor activity;protein kinase inhibitor activity;protein kinase regulator activity;protein serine/threonine kinase inhibitor activity;small conjug…	adherens junction;anchoring junction;cell junction;cell part;cell-substrate adherens junction;cell-substrate junction;contractile fiber part;cytoplasm;cytoplasmic part;cytoskeletal part;cytoskeleton;cytosol;extracellular membrane-bounded organelle;extracellular organelle;extracellular region part;extracellular space;extracellular vesicular exosome;focal adhesion;intracellular membrane-bounded org…	Amoebiasis;MAPK signaling pathway;VEGF signaling pathway	+	S1_Pel_R1_Pel;S1_Pel_R3_Pel;S1_Pel_R4_Pel;S3_Pel_R1_Pel;S3_Pel_R3_Pel;S3_Pel_R4_Pel;S4_Pel_R1_Pel;S4_Pel_R3_Pel;S4_Pel_R4_Pel	0.934	9.07577	P04792	P04792_S199	HSPB1	AQLGGPEAAKsDETAAK
-0.831271	-0.859034	-1.15092	-0.797706	-1.16541	-1.0236	0.635916	1.42019	1.29773	0.44338	1.60007	1.54206	-0.749703	-1.00367	-1.16794	-1.19972	-0.671875	-0.711487	0.510743	1.02082	0.910678	0.523251	0.650558	0.287966	-0.736636	-0.846056	-1.26764	-0.368152	-0.804835	-1.08741	0.805859	1.77064	1.28227	0.515188	0.141262	1.08448	anatomical structure homeostasis;biological adhesion;biological regulation;cell adhesion;cell surface receptor linked signaling pathway;cell-cell adhesion;cellular component movement;cellular process;cellular response to chemical stimulus;cellular response to growth factor stimulus;cellular response to organic substance;cellular response to stimulus;cellular response to vascular endothelial growt…	binding;enzyme binding;enzyme inhibitor activity;enzyme regulator activity;identical protein binding;kinase binding;kinase inhibitor activity;kinase regulator activity;protein binding;protein kinase binding;protein kinase C binding;protein kinase C inhibitor activity;protein kinase inhibitor activity;protein kinase regulator activity;protein serine/threonine kinase inhibitor activity;small conjug…	adherens junction;anchoring junction;cell junction;cell part;cell-substrate adherens junction;cell-substrate junction;contractile fiber part;cytoplasm;cytoplasmic part;cytoskeletal part;cytoskeleton;cytosol;extracellular membrane-bounded organelle;extracellular organelle;extracellular region part;extracellular space;extracellular vesicular exosome;focal adhesion;intracellular membrane-bounded org…	Amoebiasis;MAPK signaling pathway;VEGF signaling pathway	+	S1_Pel_R1_Pel;S1_Pel_R3_Pel;S1_Pel_R4_Pel;S3_Pel_R1_Pel;S3_Pel_R3_Pel;S3_Pel_R4_Pel;S4_Pel_R1_Pel;S4_Pel_R3_Pel;S4_Pel_R4_Pel	0.935	12.2836	P04792	P04792_S65	HSPB1	LPEEWSQWLGGSSWPGYVRPLPPAAIEsPAVAAPAYSR;PLPPAAIEsPAVAAPAYSR
-0.754083	-1.26212	-0.491076	-1.02458	-0.442748	-0.505357	0.869491	0.996052	0.459282	0.940475	1.6476	1.7091	-0.556039	-0.803479	-1.29464	-1.38798	-0.606313	-0.755666	1.13108	1.21524	0.284831	0.811715	0.912172	0.902586	-0.764136	-1.00702	-0.859182	-1.61691	-1.18136	-0.938188	0.685961	1.10206	0.951783	0.754095	-0.338218	1.21558	anatomical structure homeostasis;biological adhesion;biological regulation;cell adhesion;cell surface receptor linked signaling pathway;cell-cell adhesion;cellular component movement;cellular process;cellular response to chemical stimulus;cellular response to growth factor stimulus;cellular response to organic substance;cellular response to stimulus;cellular response to vascular endothelial growt…	binding;enzyme binding;enzyme inhibitor activity;enzyme regulator activity;identical protein binding;kinase binding;kinase inhibitor activity;kinase regulator activity;protein binding;protein kinase binding;protein kinase C binding;protein kinase C inhibitor activity;protein kinase inhibitor activity;protein kinase regulator activity;protein serine/threonine kinase inhibitor activity;small conjug…	adherens junction;anchoring junction;cell junction;cell part;cell-substrate adherens junction;cell-substrate junction;contractile fiber part;cytoplasm;cytoplasmic part;cytoskeletal part;cytoskeleton;cytosol;extracellular membrane-bounded organelle;extracellular organelle;extracellular region part;extracellular space;extracellular vesicular exosome;focal adhesion;intracellular membrane-bounded org…	Amoebiasis;MAPK signaling pathway;VEGF signaling pathway	+	S1_Pel_R1_Pel;S1_Pel_R3_Pel;S1_Pel_R4_Pel;S3_Pel_R1_Pel;S3_Pel_R3_Pel;S3_Pel_R4_Pel;S4_Pel_R1_Pel;S4_Pel_R3_Pel;S4_Pel_R4_Pel	0.943	11.1663	P04792	P04792_S82	HSPB1	QLsSGVSEIR
0.467671	-1.0166	0.685098	0.612411	0.890657	2.3614	-2.81231	-1.3307	-1.01456	-0.357925	0.0562738	-0.494631	-0.2929	-1.00668	0.385695	0.975146	1.14394	0.503472	0.198645	-1.14585	-0.308655	0.138466	-0.868533	-1.50773	-0.292581	0.464554	1.4627	-0.0978684	1.85483	0.344841	0.181807	0.714388	0.0198527	-0.0091738	-0.113437	-0.791717	actin filament-based movement;actin filament-based process;actin-mediated cell contraction;actin-myosin filament sliding;cardiac muscle contraction;cellular component movement;cellular process;multicellular organismal process;muscle contraction;muscle filament sliding;muscle system process;striated muscle contraction;system process	binding;calcium ion binding;cation binding;ion binding;metal ion binding;structural constituent of muscle;structural molecule activity	cell part;contractile fiber;contractile fiber part;cytoplasmic part;cytoskeletal part;cytosol;intracellular non-membrane-bounded organelle;intracellular organelle;intracellular organelle part;intracellular part;macromolecular complex;muscle myosin complex;myofibril;myosin complex;myosin II complex;non-membrane-bounded organelle;organelle;organelle part;protein complex;sarcomere		+	R1_Pel_S1_Pel;R4_Pel_S1_Pel	0.93	2.01951	P05976	P05976_S73	MYL1	ITLsQVGDVLR
0.0889084	0.0810935	1.14039	-0.595051	-0.886281	0.947033	0.683091	-0.0785382	0.227391	-0.650378	0.170536	-0.370937	-1.28163	-1.33284	-1.11745	0.266533	-0.0945467	1.44436	-0.0823183	1.06808	1.37303	-0.254749	-0.107815	1.80686	-0.000487344	-0.640978	-1.85161	-2.07781	-0.76938	-0.596599	1.62375	-0.708455	1.05666	1.55894	0.856948	-0.895723	alcohol biosynthetic process;alcohol metabolic process;biological regulation;biosynthetic process;carbohydrate biosynthetic process;carbohydrate metabolic process;cellular biosynthetic process;cellular carbohydrate biosynthetic process;cellular carbohydrate metabolic process;cellular macromolecule biosynthetic process;cellular macromolecule metabolic process;cellular metabolic process;cellular ni…	binding;carbon-oxygen lyase activity;catalytic activity;cation binding;DNA binding;enzyme binding;GTPase binding;hydro-lyase activity;ion binding;lyase activity;magnesium ion binding;metal ion binding;nucleic acid binding;nucleic acid binding transcription factor activity;phosphopyruvate hydratase activity;protein binding;protein binding transcription factor activity;sequence-specific DNA binding…	cell part;contractile fiber part;cytoplasm;cytoplasmic part;cytosol;cytosolic part;extracellular membrane-bounded organelle;extracellular organelle;extracellular region part;extracellular space;extracellular vesicular exosome;intracellular membrane-bounded organelle;intracellular organelle;intracellular part;M band;macromolecular complex;membrane;membrane-bounded organelle;membrane-bounded vesicl…	Glycolysis / Gluconeogenesis;Methane metabolism;RNA degradation	+	S3_Pel_R4_Pel;S4_Pel_R4_Pel	0.81	1.47081	P06733	P06733_S141	ENO1	HIADLAGNsEVILPVPAFNVINGGSHAGNK
0.77697	-1.38649	0.709295	0.991216	0.981847	-1.00125	0.563621	1.07284	0.518922	0.747907	1.01936	1.34186	-0.515288	-0.598066	-0.974668	-0.505469	0.934219	1.56867	-1.12383	-1.26297	-0.410288	0.985088	-1.35683	-1.02411	-1.73668	0.0240076	-0.816051	0.646675	-0.880664	-1.52555	0.92612	-0.602411	0.821308	1.18162	-0.863062	0.772123	adult behavior;adult locomotory behavior;adult walking behavior;apoptosis;axon cargo transport;axon extension;behavior;biological regulation;cell death;cell differentiation;cell growth;cell migration;cell motility;cellular component disassembly;cellular component disassembly at cellular level;cellular component disassembly involved in apoptosis;cellular component movement;cellular component organ…	apolipoprotein binding;binding;cytoskeletal protein binding;enzyme binding;lipoprotein particle binding;microtubule binding;protein binding;protein domain specific binding;protein-lipid complex binding;SH3 domain binding;structural constituent of cytoskeleton;structural molecule activity;tubulin binding	axon;axoneme;cell part;cell projection;cell projection part;cytoplasmic part;cytoskeletal part;cytosol;growth cone;intracellular organelle part;intracellular part;macromolecular complex;membrane;microtubule;microtubule associated complex;neuron projection;nuclear part;nuclear periphery;organelle part;plasma membrane;protein complex;site of polarized growth;tubulin complex	Alzheimer's disease;MAPK signaling pathway	+	S1_Pel_R4_Pel;S1_Pel_S3_Pel	0.93	1.57987	P10636	P10636_S516	MAPT	SGYSsPGSPGTPGSR;TPPSSGEPPKsGDRSGYSsPGSPGTPGSR
-0.512759	-0.212577	1.13877	0.446326	1.34621	2.53389	-0.217723	-1.05687	-1.67804	-0.844066	0.0921821	-0.696354	-0.563263	0.249179	0.140326	-0.0302776	1.9801	1.00944	0.00571129	-1.54094	-1.23068	-0.849617	-0.641163	-0.198715	1.16911	0.118005	0.140675	-0.119441	1.48088	1.08606	0.0655062	-0.00692582	0.10303	-0.064139	-2.05564	-0.586199	alcohol metabolic process;carbohydrate catabolic process;carbohydrate metabolic process;catabolic process;cellular carbohydrate catabolic process;cellular carbohydrate metabolic process;cellular glucan metabolic process;cellular macromolecule metabolic process;cellular metabolic process;cellular polysaccharide catabolic process;cellular polysaccharide metabolic process;cellular process;energy der…	binding;catalytic activity;cofactor binding;glycogen phosphorylase activity;nucleotide binding;phosphorylase activity;pyridoxal phosphate binding;transferase activity;transferase activity, transferring glycosyl groups;transferase activity, transferring hexosyl groups;vitamin B6 binding;vitamin binding	cell part;cytoplasm;cytoplasmic part;cytosol;extracellular membrane-bounded organelle;extracellular organelle;extracellular region part;extracellular vesicular exosome;intracellular part;membrane-bounded organelle;membrane-bounded vesicle;organelle;vesicle	Insulin signaling pathway;Starch and sucrose metabolism	+	R1_Pel_S1_Pel;R1_Pel_S3_Pel	1	2.49721	P11217	P11217_S514	PYGM	IGEDFIsDLDQLRK
-1.07409	-0.805988	-1.10977	-0.98693	-1.1758	-0.516533	0.310061	1.24903	0.953093	-0.0564057	1.5513	1.15563	-1.08764	-1.28675	-1.19516	-0.786304	-1.44001	0.128882	0.245702	0.644321	0.799308	0.306764	0.492812	0.0668915	-0.238978	-0.794173	-0.655937	-0.331813	-0.778719	-1.08589	1.1845	2.3713	1.64099	0.575009	0.72694	1.00436	actin filament-based movement;actin filament-based process;actin-mediated cell contraction;actin-myosin filament sliding;anatomical structure development;anatomical structure homeostasis;biological regulation;biosynthetic process;calcium-mediated signaling;cardiac muscle contraction;cell development;cellular biosynthetic process;cellular component assembly;cellular component assembly at cellular …	actin binding;binding;cation binding;cytoskeletal protein binding;dystroglycan binding;enzyme binding;glycoprotein binding;ion binding;metal ion binding;myosin binding;nitric-oxide synthase binding;protein binding;structural constituent of cytoskeleton;structural constituent of muscle;structural molecule activity;transition metal ion binding;vinculin binding;zinc ion binding	cell junction;cell part;cell projection;cell projection membrane;cell projection part;cell surface;cell-substrate junction;contractile fiber part;costamere;cytoplasmic part;cytoskeleton;cytosol;dystrophin-associated glycoprotein complex;filopodium;filopodium membrane;intracellular membrane-bounded organelle;intracellular non-membrane-bounded organelle;intracellular organelle;intracellular part;ma…	Arrhythmogenic right ventricular cardiomyopathy (ARVC);Dilated cardiomyopathy;Hypertrophic cardiomyopathy (HCM);Viral myocarditis	+	S1_Pel_R1_Pel;S1_Pel_R3_Pel;S1_Pel_R4_Pel;S3_Pel_R1_Pel;S3_Pel_R3_Pel;S3_Pel_R4_Pel;S4_Pel_R1_Pel;S4_Pel_R3_Pel;S4_Pel_R4_Pel	0.909	9.05479	P11532	P11532_S2437	DMD	AKQPDLAPGLTTIGAsPTQTVTLVTQPVVTK;QPDLAPGLTTIGAsPTQTVTLVTQPVVTK
-0.578814	-1.38233	-0.808116	-0.811583	-0.795815	-0.665541	-0.75265	1.39854	1.14188	-0.973045	1.60838	1.57934	-0.719594	-0.790262	-0.858887	-0.59932	-0.634295	0.333211	-0.645904	1.14056	1.11264	-0.835093	0.973902	0.0149075	-0.752251	0.230529	-0.614852	-0.583056	-0.569569	-1.07371	1.31896	2.09291	1.45547	-0.657155	0.51366	1.18696	actin filament-based movement;actin filament-based process;actin-mediated cell contraction;actin-myosin filament sliding;anatomical structure development;anatomical structure homeostasis;biological regulation;biosynthetic process;calcium-mediated signaling;cardiac muscle contraction;cell development;cellular biosynthetic process;cellular component assembly;cellular component assembly at cellular …	actin binding;binding;cation binding;cytoskeletal protein binding;dystroglycan binding;enzyme binding;glycoprotein binding;ion binding;metal ion binding;myosin binding;nitric-oxide synthase binding;protein binding;structural constituent of cytoskeleton;structural constituent of muscle;structural molecule activity;transition metal ion binding;vinculin binding;zinc ion binding	cell junction;cell part;cell projection;cell projection membrane;cell projection part;cell surface;cell-substrate junction;contractile fiber part;costamere;cytoplasmic part;cytoskeleton;cytosol;dystrophin-associated glycoprotein complex;filopodium;filopodium membrane;intracellular membrane-bounded organelle;intracellular non-membrane-bounded organelle;intracellular organelle;intracellular part;ma…	Arrhythmogenic right ventricular cardiomyopathy (ARVC);Dilated cardiomyopathy;Hypertrophic cardiomyopathy (HCM);Viral myocarditis	+	S1_Pel_R1_Pel;S4_Pel_R1_Pel;S4_Pel_R3_Pel;S4_Pel_R4_Pel	0.933	3.03911	P11532	P11532_S3490	DMD	sPAQILISLESEER
1.19402	1.10661	1.13218	0.953396	1.16767	1.20337	-0.8985	-0.998617	-0.819923	-0.563134	-0.544452	-0.846591	-0.753201	1.05643	-1.14017	-1.18553	1.1218	1.26318	1.15728	1.02005	0.866583	-0.667235	-1.11288	-1.26414	1.16457	-0.721018	1.05073	-1.13237	0.75672	-0.734133	-0.824725	-0.60503	1.11751	-1.08676	-0.657499	-0.7762	alcohol metabolic process;anatomical structure development;biosynthetic process;carbohydrate biosynthetic process;carbohydrate metabolic process;cellular biosynthetic process;cellular carbohydrate biosynthetic process;cellular carbohydrate metabolic process;cellular glucan metabolic process;cellular macromolecule biosynthetic process;cellular macromolecule metabolic process;cellular metabolic pro…	binding;carbohydrate binding;catalytic activity;enzyme binding;glucose binding;glucosyltransferase activity;glycogen (starch) synthase activity;kinase binding;monosaccharide binding;protein binding;protein kinase binding;sugar binding;transferase activity;transferase activity, transferring glycosyl groups;transferase activity, transferring hexosyl groups;UDP-glucosyltransferase activity;UDP-glyco…	cell part;cytoplasm;cytoplasmic part;cytosol;inclusion body;intracellular part;membrane	Insulin signaling pathway;Starch and sucrose metabolism	+	R1_Pel_S1_Pel;R1_Pel_S4_Pel	0.939	1.8179	P13807	P13807_S641	GYS1	PAsVPPsPSLSR;YPRPAsVPPsPSLSR;YPRPAsVPPsPSLsR;YPRPAsVPPsPsLSR
1.39616	1.75351	0.0920239	0.264307	0.925448	1.38249	-0.142601	-1.14319	-0.638181	-1.21663	-1.6217	-0.185732	-0.124345	0.704495	0.479593	-0.0583728	1.01806	0.554423	1.07117	-1.34468	0.486989	-0.510135	-0.725772	0.172656	-0.0921386	1.05446	1.19962	0.186304	-0.983036	1.16299	-0.281028	0.79301	-0.639135	-1.17924	-2.38927	-1.42253	alcohol metabolic process;anatomical structure development;biosynthetic process;carbohydrate biosynthetic process;carbohydrate metabolic process;cellular biosynthetic process;cellular carbohydrate biosynthetic process;cellular carbohydrate metabolic process;cellular glucan metabolic process;cellular macromolecule biosynthetic process;cellular macromolecule metabolic process;cellular metabolic pro…	binding;carbohydrate binding;catalytic activity;enzyme binding;glucose binding;glucosyltransferase activity;glycogen (starch) synthase activity;kinase binding;monosaccharide binding;protein binding;protein kinase binding;sugar binding;transferase activity;transferase activity, transferring glycosyl groups;transferase activity, transferring hexosyl groups;UDP-glucosyltransferase activity;UDP-glyco…	cell part;cytoplasm;cytoplasmic part;cytosol;inclusion body;intracellular part;membrane	Insulin signaling pathway;Starch and sucrose metabolism	+	R1_Pel_S1_Pel;R1_Pel_S4_Pel	0.92	2.86493	P13807	P13807_S710	GYS1	RNsVDTATSSSLSTPSEPLSPTSSLGEER;RNsVDTATSSSLSTPSEPLSPTSSLGEERN;RNsVDTATSSSLSTPSEPLsPTSSLGEER;RNsVDTATSSSLSTPSEPLsPTSSLGEERN
-0.319013	-0.652575	-0.926914	-1.40375	-0.117638	-0.0889201	0.802862	1.39151	1.02517	-0.096571	0.94188	1.35393	-1.41259	0.16128	-0.861626	-0.607596	-0.301832	-0.686564	1.06394	0.871536	1.11256	0.222778	1.14468	0.84902	-1.126	-1.03034	-0.801453	-1.34463	-1.71622	-1.16366	0.81606	1.72142	1.29448	0.297379	-1.15395	0.741345	alcohol metabolic process;anatomical structure development;biosynthetic process;carbohydrate biosynthetic process;carbohydrate metabolic process;cellular biosynthetic process;cellular carbohydrate biosynthetic process;cellular carbohydrate metabolic process;cellular glucan metabolic process;cellular macromolecule biosynthetic process;cellular macromolecule metabolic process;cellular metabolic pro…	binding;carbohydrate binding;catalytic activity;enzyme binding;glucose binding;glucosyltransferase activity;glycogen (starch) synthase activity;kinase binding;monosaccharide binding;protein binding;protein kinase binding;sugar binding;transferase activity;transferase activity, transferring glycosyl groups;transferase activity, transferring hexosyl groups;UDP-glucosyltransferase activity;UDP-glyco…	cell part;cytoplasm;cytoplasmic part;cytosol;inclusion body;intracellular part;membrane	Insulin signaling pathway;Starch and sucrose metabolism	+	S1_Pel_R1_Pel;S1_Pel_R3_Pel;S1_Pel_R4_Pel;S3_Pel_R1_Pel;S3_Pel_R3_Pel;S3_Pel_R4_Pel;S4_Pel_R1_Pel;S4_Pel_R3_Pel;S4_Pel_R4_Pel	0.914	6.52134	P13807	P13807_S727	GYS1	NSVDTATSSSLSTPSEPLsPTSSLGEER;NSVDTATSSSLSTPSEPLsPTSSLGEERN;RNSVDTATSSSLSTPSEPLsPTSSLGEER;RNSVDTATSSSLSTPSEPLsPTSSLGEERN;RNsVDTATSSSLSTPSEPLsPTSSLGEER;RNsVDTATSSSLSTPSEPLsPTSSLGEERN
1.95555	1.21137	0.802704	0.322268	0.628609	1.43049	1.02184	-0.725184	0.212027	-0.421077	-0.707093	1.37339	1.23505	0.675462	0.583044	-1.30629	-0.648406	0.192345	-0.274352	-2.337	1.15736	-0.855669	0.233419	0.490785	-0.546807	-0.790485	-1.63736	-0.8904	-1.25654	-0.0895354	-0.59603	1.16949	-0.261935	-0.0429386	-1.46569	0.157595	actin filament-based movement;actin filament-based process;actin-mediated cell contraction;actin-myosin filament sliding;anatomical structure morphogenesis;biological regulation;cardiac muscle tissue morphogenesis;cellular component movement;cellular process;developmental process;muscle filament sliding;muscle tissue morphogenesis;regulation of biological process;regulation of multicellular organ…	binding;cation binding;ion binding;metal ion binding	cell part;contractile fiber part;cytoplasmic part;cytoskeletal part;cytosol;intracellular organelle part;intracellular part;macromolecular complex;organelle part;protein complex;troponin complex		+	R1_Pel_R4_Pel	1	1.67209	P19237	P19237_S169	TNNI1	KNVEAMsGMEGR;NVEAMsGMEGR
0.136864	0.198133	0.0102171	-0.813311	-0.807349	-0.643016	0.913945	1.70136	0.556106	-0.233878	1.77432	0.737444	0.513416	-0.232988	0.253067	-1.83676	-1.17705	0.116905	0.558349	0.843495	0.242286	0.0619305	0.146905	0.0289238	-0.157853	-0.3135	-1.08587	-1.10245	-2.99181	-1.1418	-0.241708	2.29761	0.524607	0.477134	0.742005	-0.0556932	actin filament-based movement;actin filament-based process;actin-mediated cell contraction;actin-myosin filament sliding;anatomical structure morphogenesis;biological regulation;cardiac muscle tissue morphogenesis;cellular component movement;cellular process;developmental process;muscle filament sliding;muscle tissue morphogenesis;regulation of biological process;regulation of multicellular organ…	binding;cation binding;ion binding;metal ion binding	cell part;contractile fiber part;cytoplasmic part;cytoskeletal part;cytosol;intracellular organelle part;intracellular part;macromolecular complex;organelle part;protein complex;troponin complex		+	S1_Pel_R4_Pel;S3_Pel_R4_Pel;S4_Pel_R4_Pel	0.942	3.10427	P19237	P19237_S183	TNNI1	KMFDAAKsPTSQ;MFDAAKsPTSQ
-0.376466	0.248545	-0.425902	-0.581433	-0.53598	0.505264	-0.378625	1.02014	1.02106	-0.163201	-0.281927	2.25711	0.321774	-0.534261	-0.0386622	-0.675405	-0.0395307	-0.146829	0.254509	-0.712495	0.91233	0.0738096	-1.1442	-0.170366	-1.36627	-1.04168	-1.07922	-0.717734	-1.17339	-0.962763	0.0094523	1.77025	3.25911	-0.468011	0.0275286	1.33348	actin cytoskeleton organization;actin filament-based process;actomyosin structure organization;anatomical structure development;anatomical structure formation involved in morphogenesis;anatomical structure homeostasis;apoptosis;autolysis;biological regulation;cell cycle arrest;cell cycle process;cell death;cellular component assembly;cellular component assembly at cellular level;cellular componen…	alkali metal ion binding;binding;calcium ion binding;calcium-dependent cysteine-type endopeptidase activity;catalytic activity;cation binding;cysteine-type endopeptidase activity;cysteine-type peptidase activity;cytoskeletal protein binding;endopeptidase activity;enzyme regulator activity;hydrolase activity;ion binding;ligase regulator activity;metal ion binding;molecular transducer activity;pept…	cell part;contractile fiber;contractile fiber part;cytoplasm;cytoplasmic part;cytosol;intracellular;intracellular membrane-bounded organelle;intracellular non-membrane-bounded organelle;intracellular organelle;intracellular part;macromolecular complex;membrane;membrane part;membrane-bounded organelle;myofibril;non-membrane-bounded organelle;nucleus;organelle;organelle part;plasma membrane;plasma …		+	S1_Pel_R4_Pel;S4_Pel_R4_Pel	0.938	2.48505	P20807	P20807_S19	CAPN3	sPGPVPHPAQSK
1.15499	0.440037	0.832881	-0.260104	0.872332	1.2573	-0.419017	-2.03187	-2.35054	-1.53348	-1.2975	0.0313063	0.363227	-0.397426	-0.125347	1.05368	1.10399	1.21857	-0.0659024	-0.783612	-0.660357	-0.274118	-0.170569	0.0203032	0.288696	0.588168	-0.49618	0.432076	-1.90829	1.0427	-0.671346	0.83799	-0.0705121	-0.315477	2.08136	0.212036	actin filament-based movement;actin filament-based process;actin-mediated cell contraction;actin-myosin filament sliding;anatomical structure development;biological regulation;cellular component movement;cellular component organization;cellular component organization or biogenesis;cellular process;developmental process;muscle filament sliding;muscle organ development;muscle structure development;…	structural constituent of muscle;structural molecule activity	actin cytoskeleton;cell part;contractile fiber part;cytoplasmic part;cytoskeleton;cytosol;extracellular membrane-bounded organelle;extracellular organelle;extracellular region part;extracellular vesicular exosome;intracellular non-membrane-bounded organelle;intracellular organelle;intracellular part;membrane-bounded organelle;membrane-bounded vesicle;non-membrane-bounded organelle;organelle;organ…		+	R1_Pel_S1_Pel;R3_Pel_S1_Pel;S4_Pel_S1_Pel	0.933	2.68051	P20929	P20929_S6609	NEB	SSSVATQQTTVSSIPSHPsTAGK;SSSVATQQTTVSSIPsHPsTAGK;SSSVATQQTTVSsIPsHPsTAGK;SSSVATQQTTVsSIPsHPsTAGK;SSSVAtQQTTVSSIPsHPsTAGK;SSSVAtQQTTVsSIPSHPsTAGK;SSSVAtQQTtVSSIPSHPsTAGK
0.338197	-0.137579	0.222634	0.118685	0.529247	1.16765	-3.4605	-2.64823	0.259316	0.18981	-1.97087	0.631149	0.0882121	-0.0233665	-0.0674863	0.504438	0.167668	0.510238	-0.160494	0.0238319	0.266328	0.80079	0.442759	-0.218894	0.198501	0.165264	0.435632	0.686171	-2.33694	0.670842	0.338754	0.274305	0.0356481	0.579532	0.945175	0.43359	actin filament-based movement;actin filament-based process;actin-mediated cell contraction;actin-myosin filament sliding;anatomical structure development;biological regulation;cellular component movement;cellular component organization;cellular component organization or biogenesis;cellular process;developmental process;muscle filament sliding;muscle organ development;muscle structure development;…	structural constituent of muscle;structural molecule activity	actin cytoskeleton;cell part;contractile fiber part;cytoplasmic part;cytoskeleton;cytosol;extracellular membrane-bounded organelle;extracellular organelle;extracellular region part;extracellular vesicular exosome;intracellular non-membrane-bounded organelle;intracellular organelle;intracellular part;membrane-bounded organelle;membrane-bounded vesicle;non-membrane-bounded organelle;organelle;organ…		+	S4_Pel_S1_Pel	0.903	1.34445	P20929	P20929_S6630	NEB	AMYDYMAADADEVsFK
0.170242	-1.24242	0.219021	-0.000633249	0.0995231	0.609984	-0.2769	-0.357878	0.0845756	-0.98493	-0.691902	-0.412383	-0.287208	0.52859	0.00314855	0.608277	0.835225	0.203551	-0.662023	0.0664834	-1.281	-0.00283862	-0.812372	-1.46726	0.226765	0.718145	0.808818	-0.0566414	-3.17702	-0.98194	1.7391	1.79317	0.979015	0.0178918	2.15023	0.833592	actin filament-based movement;actin filament-based process;actin-mediated cell contraction;actin-myosin filament sliding;anatomical structure development;biological regulation;cellular component movement;cellular component organization;cellular component organization or biogenesis;cellular process;developmental process;muscle filament sliding;muscle organ development;muscle structure development;…	structural constituent of muscle;structural molecule activity	actin cytoskeleton;cell part;contractile fiber part;cytoplasmic part;cytoskeleton;cytosol;extracellular membrane-bounded organelle;extracellular organelle;extracellular region part;extracellular vesicular exosome;intracellular non-membrane-bounded organelle;intracellular organelle;intracellular part;membrane-bounded organelle;membrane-bounded vesicle;non-membrane-bounded organelle;organelle;organ…		+	S4_Pel_R4_Pel;S4_Pel_S1_Pel;S4_Pel_S3_Pel	0.937	2.4698	P20929	P20929_T5248	NEB	DKYTPVPDtPILIR;YTPVPDtPILIR
-1.19768	-0.320576	-0.0897533	-1.96055	-0.23861	-0.59821	0.659119	0.991895	0.438119	0.390744	1.09481	1.87059	0.377258	-1.64832	-0.557364	-0.161856	-0.394541	-0.535166	0.494693	0.284371	0.544886	-0.0646652	1.1408	0.876034	-1.51487	-0.748879	-1.94784	-0.981878	-1.66767	-0.272872	1.09728	1.13471	0.901257	0.881439	0.433399	1.28988	actin filament-based movement;actin filament-based process;actin-mediated cell contraction;actin-myosin filament sliding;anatomical structure development;biological regulation;cellular component movement;cellular component organization;cellular component organization or biogenesis;cellular process;developmental process;muscle filament sliding;muscle organ development;muscle structure development;…	structural constituent of muscle;structural molecule activity	actin cytoskeleton;cell part;contractile fiber part;cytoplasmic part;cytoskeleton;cytosol;extracellular membrane-bounded organelle;extracellular organelle;extracellular region part;extracellular vesicular exosome;intracellular non-membrane-bounded organelle;intracellular organelle;intracellular part;membrane-bounded organelle;membrane-bounded vesicle;non-membrane-bounded organelle;organelle;organ…		+	S1_Pel_R1_Pel;S1_Pel_R3_Pel;S1_Pel_R4_Pel;S3_Pel_R1_Pel;S3_Pel_R3_Pel;S3_Pel_R4_Pel;S4_Pel_R1_Pel;S4_Pel_R3_Pel;S4_Pel_R4_Pel	0.879	6.89926	P20929	P20929_T6353	NEB	ATPTPFtPEMER
0.00994198	-0.319576	-0.0758123	-1.07884	-0.726227	-0.799108	0.562801	0.970621	0.766197	-0.220778	1.3772	1.79675	-0.741189	-0.664946	-0.787057	-0.746363	-0.0754893	-0.360508	0.355922	-0.0498655	0.408996	-0.0682303	0.643954	0.502239	-0.407451	-0.423463	-1.03863	-1.26432	-3.35994	-0.317579	0.701782	1.65266	1.65998	0.536437	0.375785	1.20409	actin filament-based movement;actin filament-based process;actin-mediated cell contraction;actin-myosin filament sliding;anatomical structure development;biological regulation;cellular component movement;cellular component organization;cellular component organization or biogenesis;cellular process;developmental process;muscle filament sliding;muscle organ development;muscle structure development;…	structural constituent of muscle;structural molecule activity	actin cytoskeleton;cell part;contractile fiber part;cytoplasmic part;cytoskeleton;cytosol;extracellular membrane-bounded organelle;extracellular organelle;extracellular region part;extracellular vesicular exosome;intracellular non-membrane-bounded organelle;intracellular organelle;intracellular part;membrane-bounded organelle;membrane-bounded vesicle;non-membrane-bounded organelle;organelle;organ…		+	S1_Pel_R1_Pel;S1_Pel_R3_Pel;S1_Pel_R4_Pel;S3_Pel_R4_Pel;S4_Pel_R1_Pel;S4_Pel_R3_Pel;S4_Pel_R4_Pel	0.937	5.29018	P20929	P20929_T6384	NEB	ATPTPVtPEMER;KATPTPVtPEMER;KATPtPVtPEMER;KAtPTPVtPEMER
-1.1794	-0.153435	-0.769728	-0.319029	-2.09081	-0.660342	0.457043	1.47409	1.05265	0.45783	1.41511	1.58997	-1.08314	-0.612765	-0.444907	-0.0199328	0.125779	-0.265673	0.896059	0.959476	1.18469	-0.495266	0.866379	0.949974	-0.67783	-0.826626	-0.972849	-0.762596	-1.18432	-0.699129	1.06849	1.10236	0.623198	-1.05681	-1.48576	1.53725	actin filament-based movement;actin filament-based process;actin-mediated cell contraction;actin-myosin filament sliding;anatomical structure development;biological regulation;cellular component movement;cellular component organization;cellular component organization or biogenesis;cellular process;developmental process;muscle filament sliding;muscle organ development;muscle structure development;…	structural constituent of muscle;structural molecule activity	actin cytoskeleton;cell part;contractile fiber part;cytoplasmic part;cytoskeleton;cytosol;extracellular membrane-bounded organelle;extracellular organelle;extracellular region part;extracellular vesicular exosome;intracellular non-membrane-bounded organelle;intracellular organelle;intracellular part;membrane-bounded organelle;membrane-bounded vesicle;non-membrane-bounded organelle;organelle;organ…		+	S1_Pel_R1_Pel;S1_Pel_R3_Pel;S1_Pel_R4_Pel;S3_Pel_R1_Pel;S3_Pel_R4_Pel	0.94	4.30383	P20929	P20929_T6450	NEB	GCFtPVVTDPITER;HKGCFtPVVTDPITER
1.25134	0.254756	1.55873	-0.24896	0.362783	3.48358	0.331138	-0.194833	-0.287242	-0.62694	0.372088	1.47566	-0.736126	-0.937236	-0.743014	-0.442985	-0.24439	-0.169607	1.03203	-0.330829	0.215875	-0.267184	0.437786	-0.776204	-1.40916	0.586345	0.80008	-0.454261	-2.12144	-1.58027	-0.254211	0.227037	0.689651	-0.541373	-0.269094	-0.443516	anatomical structure development;anatomical structure morphogenesis;biological regulation;calcium ion homeostasis;calcium ion transport;calcium ion transport into cytosol;cation homeostasis;cation transport;cell development;cellular calcium ion homeostasis;cellular cation homeostasis;cellular chemical homeostasis;cellular developmental process;cellular divalent inorganic cation homeostasis;cellul…	binding;calcium channel activity;calcium-release channel activity;calmodulin binding;cation channel activity;cation transmembrane transporter activity;channel activity;gated channel activity;intracellular ligand-gated calcium channel activity;intracellular ligand-gated ion channel activity;ion channel activity;ion transmembrane transporter activity;ligand-gated channel activity;ligand-gated ion c…	cell cortex;cell part;contractile fiber part;cytoplasm;cytoplasmic part;endoplasmic reticulum;endoplasmic reticulum membrane;endoplasmic reticulum part;extracellular membrane-bounded organelle;extracellular organelle;extracellular region part;extracellular vesicular exosome;I band;integral to membrane;integral to plasma membrane;intracellular membrane-bounded organelle;intracellular organelle;int…	Calcium signaling pathway;Long-term depression	+	R1_Pel_R3_Pel;R1_Pel_R4_Pel	0.937	1.75107	P21817	P21817_S2843	RYR1	IsQSAQTYDPR;KIsQSAQTYDPR
-1.08087	0.607451	-0.907973	-0.803582	0.301328	-1.48449	0.570577	1.18495	-0.975518	0.317135	1.30519	0.975162	-1.12357	-1.33512	-1.60359	0.495191	0.5491	1.33949	-0.624226	0.514286	-1.58517	0.438683	0.720484	0.388898	-1.50691	0.262031	-1.32958	-1.35691	-0.00873807	0.197414	0.797445	0.989968	0.986967	0.509752	1.78929	0.485458	apoptosis;biological regulation;biosynthetic process;catabolic process;cell cycle phase;cell cycle process;cell death;cell division;cellular biosynthetic process;cellular catabolic process;cellular component disassembly;cellular component disassembly at cellular level;cellular component organization;cellular component organization at cellular level;cellular component organization or biogenesis;ce…	binding;carbon-oxygen lyase activity;catalytic activity;damaged DNA binding;DNA binding;DNA N-glycosylase activity;DNA-(apurinic or apyrimidinic site) lyase activity;enzyme binding;hydrolase activity;hydrolase activity, acting on glycosyl bonds;hydrolase activity, hydrolyzing N-glycosyl compounds;iron-sulfur cluster binding;kinase binding;lyase activity;metal cluster binding;mRNA binding;NF-kappa…	adherens junction;anchoring junction;cell junction;cell part;cell projection membrane;cell projection part;cell-substrate adherens junction;cell-substrate junction;cytoplasm;cytoplasmic part;cytoskeletal part;cytosol;cytosolic small ribosomal subunit;extracellular membrane-bounded organelle;extracellular organelle;extracellular region part;extracellular vesicular exosome;focal adhesion;intracellu…	Ribosome	+	S4_Pel_R4_Pel	0.928	1.60554	P23396	P23396_T221	RPS3	DEILPTtPISEQK
1.24946	0.66062	0.446	-0.0592551	0.326333	-1.20474	0.244497	-2.16853	0.130083	0.162231	0.224688	-0.0998974	0.195059	-0.188064	0.704537	0.575089	0.579905	1.51759	0.349061	-0.247447	0.411969	0.275343	-0.0113915	0.158536	-1.47913	-1.33669	-3.0053	-0.0303722	-1.75829	0.545034	0.139748	0.29713	0.272262	0.0934213	2.38168	-0.351161	cell cycle process;cell division;cellular component movement;cellular component organization;cellular component organization at cellular level;cellular component organization or biogenesis;cellular component organization or biogenesis at cellular level;cellular process;cytoskeleton organization;establishment of localization;establishment of localization in cell;establishment of organelle localiza…	structural molecule activity	cell part;cytoplasm;cytoskeletal part;cytoskeleton;extracellular membrane-bounded organelle;extracellular organelle;extracellular region part;extracellular vesicular exosome;intracellular non-membrane-bounded organelle;intracellular organelle;intracellular organelle part;intracellular part;macromolecular complex;membrane;membrane-bounded organelle;membrane-bounded vesicle;microtubule;microtubule …		+	R3_Pel_R4_Pel;S4_Pel_R4_Pel	1	1.76715	P27816	P27816_S1073	MAP4	VGsLDNVGHLPAGGAVK
0.246144	0.25709	-0.166388	-0.143558	-0.448217	-1.51491	0.571842	0.967472	0.832306	0.241797	0.887414	0.947141	-1.56312	-1.59803	-0.278271	-0.104883	-0.0945893	0.720545	0.307659	0.563108	0.714567	0.509312	0.556993	0.473245	-1.88821	-1.08924	-0.203704	-1.91607	-2.35913	-1.10778	0.869298	1.04332	0.895238	0.809295	1.58628	0.476047	cell cycle process;cell division;cellular component movement;cellular component organization;cellular component organization at cellular level;cellular component organization or biogenesis;cellular component organization or biogenesis at cellular level;cellular process;cytoskeleton organization;establishment of localization;establishment of localization in cell;establishment of organelle localiza…	structural molecule activity	cell part;cytoplasm;cytoskeletal part;cytoskeleton;extracellular membrane-bounded organelle;extracellular organelle;extracellular region part;extracellular vesicular exosome;intracellular non-membrane-bounded organelle;intracellular organelle;intracellular organelle part;intracellular part;macromolecular complex;membrane;membrane-bounded organelle;membrane-bounded vesicle;microtubule;microtubule …		+	R1_Pel_R4_Pel;S1_Pel_R3_Pel;S1_Pel_R4_Pel;S3_Pel_R4_Pel;S4_Pel_R1_Pel;S4_Pel_R3_Pel;S4_Pel_R4_Pel	0.932	6.34581	P27816	P27816_S280	MAP4	DMEsPTKLDVTLAK
-0.924253	-0.757392	-0.619539	-0.413946	-1.08414	-1.50064	0.631863	1.72219	0.653596	0.369048	2.28248	1.70955	-0.746282	-0.717195	-0.786048	-0.766155	-0.0413416	-0.573028	0.276681	0.875224	0.60394	0.386764	0.78458	0.611386	-1.04905	-0.531833	-0.541297	-1.15237	-1.33094	-1.13877	0.413561	2.03921	0.0975565	1.04707	-0.64123	0.81076	actin filament-based movement;actin filament-based process;actin-mediated cell contraction;actin-myosin filament sliding;biological adhesion;biological regulation;blood coagulation;cell activation;cell adhesion;cell communication;cell junction assembly;cell junction organization;cell projection assembly;cell projection organization;cell-cell signaling;cell-substrate junction assembly;cellular che…	binding;calcium ion binding;cation binding;cytoskeletal protein binding;FATZ binding;identical protein binding;integrin binding;ion binding;ion channel binding;ligand-dependent nuclear receptor transcription coactivator activity;metal ion binding;protein binding;protein binding transcription factor activity;protein complex binding;protein dimerization activity;protein domain specific binding;rece…	actin filament;adherens junction;anchoring junction;cell cortex part;cell junction;cell part;cell projection;cell projection part;cell-substrate adherens junction;cell-substrate junction;contractile fiber part;cortical actin cytoskeleton;cortical cytoskeleton;cytoplasmic membrane-bounded vesicle lumen;cytoplasmic part;cytoplasmic vesicle part;cytoskeletal part;cytoskeleton;cytosol;dendritic spine…	Adherens junction;Amoebiasis;Arrhythmogenic right ventricular cardiomyopathy (ARVC);Focal adhesion;Leukocyte transendothelial migration;Regulation of actin cytoskeleton;Systemic lupus erythematosus;Tight junction	+	S1_Pel_R1_Pel;S1_Pel_R3_Pel;S1_Pel_R4_Pel;S3_Pel_R1_Pel;S3_Pel_R3_Pel;S3_Pel_R4_Pel;S4_Pel_R1_Pel;S4_Pel_R3_Pel;S4_Pel_R4_Pel	1	7.25008	P35609	P35609_T237	ACTN2	MLDAEDIVNtPK;MLDAEDIVNtPKPDER
0.836722	0.334144	0.867702	0.72905	1.06351	0.616843	-1.08179	0.353289	-0.856279	-1.89036	-1.70602	-1.03382	0.858938	0.453983	0.501862	0.620865	-1.43153	0.587666	0.837562	0.391456	-1.53812	0.571561	-1.73885	-1.59562	1.05923	0.49021	0.534199	0.771056	0.45443	-1.5247	1.02876	0.278086	0.832932	0.911751	-0.688561	-0.90016	actin filament-based movement;actin filament-based process;actin-mediated cell contraction;actin-myosin filament sliding;biological adhesion;biological regulation;blood coagulation;cell activation;cell adhesion;cell communication;cell junction assembly;cell junction organization;cell projection assembly;cell projection organization;cell-cell signaling;cell-substrate junction assembly;cellular che…	binding;calcium ion binding;cation binding;cytoskeletal protein binding;FATZ binding;identical protein binding;integrin binding;ion binding;ion channel binding;ligand-dependent nuclear receptor transcription coactivator activity;metal ion binding;protein binding;protein binding transcription factor activity;protein complex binding;protein dimerization activity;protein domain specific binding;rece…	actin filament;adherens junction;anchoring junction;cell cortex part;cell junction;cell part;cell projection;cell projection part;cell-substrate adherens junction;cell-substrate junction;contractile fiber part;cortical actin cytoskeleton;cortical cytoskeleton;cytoplasmic membrane-bounded vesicle lumen;cytoplasmic part;cytoplasmic vesicle part;cytoskeletal part;cytoskeleton;cytosol;dendritic spine…	Adherens junction;Amoebiasis;Arrhythmogenic right ventricular cardiomyopathy (ARVC);Focal adhesion;Leukocyte transendothelial migration;Regulation of actin cytoskeleton;Systemic lupus erythematosus;Tight junction	+	R1_Pel_S1_Pel	0.927	1.81465	P35609	P35609_T744	ACTN2	TINEVETQILtR
-1.52813	-1.99176	0.199347	-0.804798	0.65118	-0.795734	0.728897	0.959874	0.28931	0.546961	0.664344	0.563067	0.341777	0.79098	-0.179239	0.723392	0.597525	0.842875	0.997587	0.160995	0.340666	0.279478	0.730524	0.0861194	0.216137	0.12477	-0.335459	-1.63764	-3.17365	-1.61636	-1.04706	0.668565	0.04899	-0.685542	1.40996	0.832074	actin cytoskeleton organization;actin filament bundle assembly;actin filament capping;actin filament organization;actin filament-based process;anatomical structure homeostasis;anatomical structure morphogenesis;apoptosis;barbed-end actin filament capping;biological regulation;cell communication;cell death;cell differentiation;cell morphogenesis;cell volume homeostasis;cellular component assembly;…	actin binding;actin filament binding;binding;cytoskeletal protein binding;identical protein binding;protein binding;protein dimerization activity;protein heterodimerization activity;protein homodimerization activity;spectrin binding;structural molecule activity;transcription factor binding	adherens junction;anchoring junction;cell junction;cell part;cell projection;cell projection part;cell-substrate adherens junction;cell-substrate junction;cytoplasmic part;cytoskeletal part;cytoskeleton;cytosol;dendritic spine;F-actin capping protein complex;focal adhesion;intermediate filament cytoskeleton;intracellular membrane-bounded organelle;intracellular non-membrane-bounded organelle;intr…		+	R3_Pel_R4_Pel;S1_Pel_R4_Pel;S3_Pel_R4_Pel	0.928	2.52552	P35611	P35611_S358	ADD1	SPGsPVGEGTGSPPK
0.0845283	-0.984228	-0.771385	-0.646608	0.533445	-0.544886	-0.303354	0.782351	0.189297	0.944297	2.27059	-0.368514	-1.93706	-0.752493	-1.19321	-1.34311	0.903223	-0.386482	0.70819	-0.603269	-0.071568	0.680981	0.474068	-0.278886	-1.58399	-0.41266	-0.429211	-1.72504	0.0755338	-0.530662	1.12752	1.34245	1.47827	0.928002	1.59913	0.744724	actin filament-based movement;actin filament-based process;actin-mediated cell contraction;actin-myosin filament sliding;biological regulation;cellular component movement;cellular process;metabolic process;multicellular organismal process;muscle contraction;muscle filament sliding;muscle system process;regulation of ATPase activity;regulation of biological process;regulation of catabolic process;…	binding;calcium-dependent protein binding;cytoskeletal protein binding;protein binding;tropomyosin binding;troponin C binding;troponin I binding	cell part;contractile fiber part;cytoplasmic part;cytoskeletal part;cytosol;intracellular organelle part;intracellular part;macromolecular complex;organelle part;protein complex;troponin complex		+	S1_Pel_R3_Pel;S1_Pel_R4_Pel;S4_Pel_R1_Pel;S4_Pel_R3_Pel;S4_Pel_R4_Pel	0.914	3.77884	P45378	P45378_S167	TNNT3	ALSSMGANYSsYLAK
-0.539969	-1.16878	-0.685898	-1.2559	-0.917481	-0.40466	0.642676	1.69972	0.598534	-0.187993	0.783952	1.70773	-0.388164	0.117338	-1.38708	-1.84073	-0.217505	0.05629	0.661632	1.28563	0.677084	0.230206	0.4358	0.182546	-0.558433	-1.1215	-1.00968	-1.49448	-1.00952	-1.12227	1.15489	1.81937	1.17614	0.389717	0.829692	0.861089	actin cytoskeleton organization;actin filament capping;actin filament-based process;barbed-end actin filament capping;biological regulation;blood coagulation;cellular component movement;cellular component organization;cellular component organization at cellular level;cellular component organization or biogenesis;cellular component organization or biogenesis at cellular level;cellular process;coag…	actin binding;actin filament binding;binding;cytoskeletal protein binding;protein binding	actin cytoskeleton;actin filament;cell part;contractile fiber part;cytoplasmic part;cytoskeletal part;cytoskeleton;cytosol;extracellular membrane-bounded organelle;extracellular organelle;extracellular region part;extracellular vesicular exosome;F-actin capping protein complex;intracellular non-membrane-bounded organelle;intracellular organelle;intracellular organelle part;intracellular part;macr…		+	S1_Pel_R1_Pel;S1_Pel_R3_Pel;S1_Pel_R4_Pel;S3_Pel_R1_Pel;S3_Pel_R3_Pel;S3_Pel_R4_Pel;S4_Pel_R1_Pel;S4_Pel_R3_Pel;S4_Pel_R4_Pel	0.944	7.38182	P47756	P47756_S263	CAPZB	ELsQVLTQR
-0.942074	-1.49266	-0.665153	-1.64643	0.888036	0.390551	-0.952018	-0.812641	-0.492835	-1.19931	-1.10931	-1.31044	0.695312	-0.753826	0.668063	1.45893	1.17531	1.5137	-1.14727	-0.853383	0.753125	-0.289739	-0.839291	0.801898	0.176979	1.31079	-0.839879	1.15737	0.904324	0.381559	1.07883	1.24206	0.686348	-1.20623	0.802208	0.467091	multicellular organismal process;muscle contraction;muscle system process;system process	structural constituent of muscle;structural molecule activity	cell part;contractile fiber part;cytoplasmic part;cytoskeletal part;intracellular membrane-bounded organelle;intracellular organelle;intracellular organelle part;intracellular part;M band;macromolecular complex;membrane-bounded organelle;mitochondrion;myosin complex;myosin filament;organelle;organelle part;protein complex		+	R3_Pel_S1_Pel;R4_Pel_S1_Pel;S4_Pel_S1_Pel	0.917	2.48359	P54296	P54296_S1315	MYOM2	sLDLSGQAFDEAFAEFQQFK
0.456999	-0.82037	-0.867601	-0.711237	0.115806	0.358955	0.71187	1.58195	0.488644	0.635455	0.943231	1.56478	0.123338	0.200554	-1.43941	-0.856912	-1.45067	-1.53262	0.858888	0.744332	0.221766	0.740007	0.440056	-1.63391	-0.583567	0.00157972	-1.22646	-1.12033	-0.896119	-1.65771	0.781906	1.82882	0.929906	0.850796	-0.740268	0.957546	biological regulation;catabolic process;cellular catabolic process;cellular macromolecule catabolic process;cellular macromolecule metabolic process;cellular metabolic process;cellular nitrogen compound metabolic process;cellular process;cellular response to stimulus;cellular response to stress;DNA metabolic process;DNA repair;macromolecule catabolic process;macromolecule metabolic process;metabo…	binding;damaged DNA binding;DNA binding;nucleic acid binding;polyubiquitin binding;protein binding;single-stranded DNA binding;small conjugating protein binding;structure-specific DNA binding;ubiquitin binding	cell part;cytoplasm;intracellular organelle part;intracellular part;macromolecular complex;nuclear part;nucleoplasm;organelle part;proteasome complex;protein complex	Nucleotide excision repair;Protein processing in endoplasmic reticulum	+	S1_Pel_R3_Pel;S1_Pel_R4_Pel;S4_Pel_R3_Pel;S4_Pel_R4_Pel	0.903	3.8346	P54725	P54725_S123	RAD23A	EDKsPSEESAPTTSPESVSGSVPSSGSSGR
1.67596	1.21649	1.07932	0.890341	-0.206981	1.55282	0.783635	-0.216854	0.523724	-1.02311	-0.350651	0.269459	1.18641	0.535227	1.16223	0.313778	-1.20124	0.92148	0.99655	-2.19149	-0.969753	-0.965897	0.146661	-0.557261	1.23898	-0.365012	-0.880565	-0.962538	-1.89562	-1.3774	0.514989	-0.505773	-0.764633	-0.343451	0.421035	-0.65085	actin filament-based movement;actin filament-based process;actin-mediated cell contraction;actin-myosin filament sliding;biological adhesion;cell adhesion;cellular component movement;cellular process;muscle filament sliding	binding;cytoskeletal protein binding;protein binding;structural constituent of muscle;structural molecule activity;titin binding	cell part;contractile fiber;cytoplasmic part;cytoskeletal part;cytosol;intracellular non-membrane-bounded organelle;intracellular organelle;intracellular organelle part;intracellular part;macromolecular complex;myofibril;myosin complex;myosin filament;non-membrane-bounded organelle;organelle;organelle part;protein complex		+	R1_Pel_R4_Pel;R1_Pel_S3_Pel	0.936	1.9683	Q00872	Q00872_S825	MYBPC1	YYsQPILVK
-0.956891	-0.999219	0.338216	-1.01771	-1.08485	-0.849723	1.12062	1.39023	1.2971	0.625458	1.30775	0.841458	-0.71967	0.734896	-0.0430116	-0.535881	-1.06156	-0.903705	-0.900419	1.33146	1.0149	0.894422	1.14874	-1.19852	-0.943155	0.321122	-1.2745	-0.862121	-1.59189	-0.957422	0.667714	1.2178	0.569559	1.25196	-0.876976	0.703811	actin filament-based movement;actin filament-based process;actin-mediated cell contraction;actin-myosin filament sliding;biological adhesion;cell adhesion;cellular component movement;cellular process;muscle filament sliding	binding;cytoskeletal protein binding;protein binding;structural constituent of muscle;structural molecule activity;titin binding	cell part;contractile fiber;cytoplasmic part;cytoskeletal part;cytosol;intracellular non-membrane-bounded organelle;intracellular organelle;intracellular organelle part;intracellular part;macromolecular complex;myofibril;myosin complex;myosin filament;non-membrane-bounded organelle;organelle;organelle part;protein complex		+	S1_Pel_R1_Pel;S1_Pel_R3_Pel;S1_Pel_R4_Pel;S3_Pel_R4_Pel;S4_Pel_R1_Pel;S4_Pel_R4_Pel	0.927	3.93169	Q00872	Q00872_T166	MYBPC1	DKFDSCSFDLEVHESTGTtPNIDIR
-1.14259	-1.13217	-0.742665	-0.673103	-1.00387	-0.672931	0.359908	1.33974	1.60152	-0.200223	1.22852	1.1944	-1.33389	0.0455141	-1.82697	-0.442279	-0.575876	-0.564369	0.543099	0.620468	0.921949	0.541448	0.464117	0.00724367	-0.754623	-0.705757	-0.599798	-0.837801	-1.09317	-1.14485	1.23993	1.7058	2.01709	0.395321	0.148634	1.07221	actin filament-based movement;actin filament-based process;actin-mediated cell contraction;actin-myosin filament sliding;biological adhesion;cell adhesion;cellular component movement;cellular process;muscle filament sliding	binding;cytoskeletal protein binding;protein binding;structural constituent of muscle;structural molecule activity;titin binding	cell part;contractile fiber;cytoplasmic part;cytoskeletal part;cytosol;intracellular non-membrane-bounded organelle;intracellular organelle;intracellular organelle part;intracellular part;macromolecular complex;myofibril;myosin complex;myosin filament;non-membrane-bounded organelle;organelle;organelle part;protein complex		+	S1_Pel_R1_Pel;S1_Pel_R3_Pel;S1_Pel_R4_Pel;S3_Pel_R1_Pel;S3_Pel_R3_Pel;S3_Pel_R4_Pel;S4_Pel_R1_Pel;S4_Pel_R3_Pel;S4_Pel_R4_Pel	0.931	7.90385	Q00872	Q00872_T31	MYBPC1	EAGTtPAKDWTLVETPPGEEQAK;EAGTtPAKDWTLVEtPPGEEQAK;EAGttPAKDWtLVETPPGEEQAK;EKEAGTtPAKDWTLVETPPGEEQAK
0.879594	0.766123	-0.822987	-1.47128	-1.04511	-0.156791	1.07161	2.08084	1.2973	0.0901007	0.955989	2.04635	-0.174998	-0.672225	-0.500433	-0.674909	-0.521008	-0.276053	0.537611	1.44108	0.619206	0.0358255	0.614372	0.165045	-0.296084	-0.648805	-0.130898	-1.47502	-2.15438	-1.28204	0.25276	1.1019	-0.638198	0.610163	-1.23343	-0.391225	biological regulation;cellular component organization;cellular component organization at cellular level;cellular component organization or biogenesis;cellular component organization or biogenesis at cellular level;cellular localization;cellular process;lipid localization;lipid particle organization;lipid storage;localization;macromolecule localization;mitochondrion localization;negative regulatio…		cell part;cytoplasm;cytoplasmic part;cytosol;intracellular membrane-bounded organelle;intracellular organelle;intracellular part;lipid particle;membrane-bounded organelle;mitochondrion;organelle		+	S1_Pel_R1_Pel;S1_Pel_R3_Pel;S1_Pel_R4_Pel;S1_Pel_S4_Pel;S3_Pel_R4_Pel	0.94	3.88799	Q00G26	Q00G26_S277	PLIN5	RRsQAELETLVLSR;sQAELETLVLSR
1.6826	0.432707	0.447863	0.0201047	0.00489668	1.15044	0.102421	-0.665311	-2.91066	-1.22839	0.091419	-0.799726	-0.0229747	0.0361316	-0.0620913	1.12322	1.2631	1.12273	-0.153931	-2.19625	-0.289389	-0.492418	0.393302	-0.84545	0.203847	0.318465	-0.0807508	0.168106	-1.92591	0.0575795	0.335906	0.0854708	0.584172	-0.404761	2.14428	0.309273	anatomical structure development;anatomical structure formation involved in morphogenesis;atrial septum development;axon guidance;biological regulation;calcium ion homeostasis;calcium ion transport;calcium-mediated signaling;cardiac muscle contraction;cardiac septum development;cation homeostasis;cation transport;cell junction assembly;cell junction organization;cell-cell junction assembly;cell-c…	ATPase binding;binding;binding, bridging;channel regulator activity;cytoskeletal protein binding;enzyme binding;ion channel binding;kinase binding;potassium channel regulator activity;protein binding;protein binding, bridging;protein kinase binding;spectrin binding;structural constituent of cytoskeleton;structural molecule activity	A band;apical plasma membrane;basolateral plasma membrane;cell junction;cell part;cell projection;cell-cell contact zone;cell-cell junction;contractile fiber part;costamere;cytoplasmic part;cytoskeleton;cytosol;integral to membrane;integral to plasma membrane;intercalated disc;intracellular;intracellular non-membrane-bounded organelle;intracellular organelle;intracellular part;intrinsic to membra…		+	R1_Pel_S1_Pel	0.937	1.95224	Q01484	Q01484_S3823	ANK2	GGsPIIQEPEEPSEHR;GGsPIIQEPEEPSEHREESSPR
0.76056	0.1901	-0.103345	-1.159	-0.242057	-0.331888	1.16656	1.26609	1.12481	-0.0924838	0.770481	1.41567	-0.314679	-0.289523	-2.28638	-1.1259	-0.145445	0.414707	0.215817	-0.2648	0.813536	0.322845	0.537824	0.497051	-0.185301	-2.56224	-1.22694	-0.900477	-2.11951	-0.607026	0.606153	0.776312	1.05259	0.15001	1.16231	0.713562	anatomical structure development;biological regulation;cardiac muscle fiber development;cell development;cellular developmental process;cellular macromolecule metabolic process;cellular metabolic process;cellular process;cellular protein metabolic process;developmental process;macromolecule metabolic process;macromolecule modification;metabolic process;muscle cell development;muscle fiber develop…	actin binding;actin filament binding;binding;calmodulin-dependent protein kinase activity;catalytic activity;cytoskeletal protein binding;kinase activity;phosphotransferase activity, alcohol group as acceptor;protein binding;protein kinase activity;protein serine/threonine kinase activity;structural constituent of muscle;structural molecule activity;transferase activity;transferase activity, tran…	adherens junction;anchoring junction;cell junction;cell part;cell-substrate adherens junction;cell-substrate junction;contractile fiber part;cytoplasmic part;cytoskeleton;focal adhesion;intracellular non-membrane-bounded organelle;intracellular organelle;intracellular part;non-membrane-bounded organelle;organelle;organelle part;Z disc		+	S1_Pel_R3_Pel;S1_Pel_R4_Pel;S3_Pel_R4_Pel;S4_Pel_R3_Pel;S4_Pel_R4_Pel	0.942	4.80171	Q0ZGT2	Q0ZGT2_S357	NEXN	NMVVDDDsPEMYK;RNMVVDDDsPEMYK
-0.00443997	-1.84972	0.477824	-2.29737	0.939236	0.383589	0.337404	-0.39298	-0.560479	0.846133	0.601151	1.18986	0.311244	-0.342077	-0.327395	0.0477146	-0.815899	-1.65665	-0.986567	0.659046	0.521764	0.858488	0.103087	0.616578	-0.763476	-0.91001	-0.407026	-1.1542	-0.562152	-0.825126	0.976032	0.355685	0.915607	1.43197	2.71417	-0.431019	anatomical structure development;biological regulation;cardiac muscle fiber development;cell development;cellular developmental process;cellular macromolecule metabolic process;cellular metabolic process;cellular process;cellular protein metabolic process;developmental process;macromolecule metabolic process;macromolecule modification;metabolic process;muscle cell development;muscle fiber develop…	actin binding;actin filament binding;binding;calmodulin-dependent protein kinase activity;catalytic activity;cytoskeletal protein binding;kinase activity;phosphotransferase activity, alcohol group as acceptor;protein binding;protein kinase activity;protein serine/threonine kinase activity;structural constituent of muscle;structural molecule activity;transferase activity;transferase activity, tran…	adherens junction;anchoring junction;cell junction;cell part;cell-substrate adherens junction;cell-substrate junction;contractile fiber part;cytoplasmic part;cytoskeleton;focal adhesion;intracellular non-membrane-bounded organelle;intracellular organelle;intracellular part;non-membrane-bounded organelle;organelle;organelle part;Z disc		+	S4_Pel_R4_Pel	0.917	1.88576	Q0ZGT2	Q0ZGT2_S564	NEXN	KREEEEEEEGsIMNGSTAEDEEQTR
-0.956177	-0.721828	-0.189979	-1.34658	-0.535317	-0.427296	-0.606571	1.40932	1.18215	-0.831433	1.33347	1.20558	-0.825335	-0.320018	-0.872509	-0.281161	-0.904071	-0.745113	0.868145	-0.757843	1.00454	-1.24523	1.00243	0.830231	-0.589754	-0.837823	-0.329996	-0.460739	-1.56682	-0.952896	1.24839	1.54399	1.62374	1.30596	0.398995	1.34755	anatomical structure morphogenesis;axon guidance;axonogenesis;biological regulation;cation homeostasis;cell cycle cytokinesis;cell cycle process;cell part morphogenesis;cell projection morphogenesis;cell projection organization;cellular chemical homeostasis;cellular component assembly;cellular component assembly at cellular level;cellular component morphogenesis;cellular component organization;ce…	binding;binding, bridging;cadherin binding;cell adhesion molecule binding;cytoskeletal protein binding;ion channel binding;protein binding;protein binding, bridging;spectrin binding;structural constituent of cytoskeleton;structural molecule activity	axon part;basolateral plasma membrane;cell junction;cell part;cell projection;cell projection part;cell surface;cell-cell contact zone;cell-cell junction;contractile fiber part;costamere;cytoplasmic part;cytoskeleton;dendrite;endoplasmic reticulum;Golgi apparatus;initial segment;intercalated disc;intracellular membrane-bounded organelle;intracellular non-membrane-bounded organelle;intracellular o…		+	S1_Pel_R1_Pel;S1_Pel_R3_Pel;S1_Pel_R4_Pel;S4_Pel_R1_Pel;S4_Pel_R3_Pel;S4_Pel_R4_Pel	0.914	4.71526	Q12955	Q12955_S4298	ANK3	IHGSGHVEEPAsPLAAYQK
-1.12164	0.498904	-0.909567	-1.96356	0.678532	0.629184	0.752161	0.817298	-0.564312	0.537951	0.671887	0.893721	0.0961827	-0.984216	0.119866	-0.954427	0.608045	-1.41191	0.430495	1.01067	0.828505	0.418371	0.843162	0.491298	0.0877806	-1.79392	0.636311	-2.63325	-1.3627	-1.45211	0.595914	0.713341	1.01983	0.763886	0.347795	0.660534	biological regulation;cellular chemical homeostasis;cellular component organization;cellular component organization or biogenesis;cellular homeostasis;cellular ion homeostasis;cellular process;chemical homeostasis;homeostatic process;ion homeostasis;multicellular organismal process;muscle contraction;muscle system process;neuromuscular junction development;regulation of biological process;regulat…	ATPase binding;binding;enzyme binding;ion channel binding;nitric-oxide synthase binding;protein binding	cell junction;cell part;cytoplasm;cytoskeleton;intracellular;intracellular non-membrane-bounded organelle;intracellular organelle;intracellular part;macromolecular complex;membrane;membrane part;neuromuscular junction;non-membrane-bounded organelle;organelle;plasma membrane;plasma membrane part;postsynaptic membrane;protein complex;sarcolemma;synapse;synapse part;synaptic membrane;syntrophin comp…		+	S1_Pel_R4_Pel;S3_Pel_R4_Pel;S4_Pel_R4_Pel	0.932	2.76619	Q13424	Q13424_S189	SNTA1	NSTGGTSVGWDsPPASPLQR;NSTGGTSVGWDsPPAsPLQR
-1.86149	0.609523	-0.0569268	0.286698	7.92873e-05	0.307902	-0.985881	1.22123	0.468881	-1.85874	1.23015	1.4774	0.232247	-0.103584	-0.684711	-0.94791	-1.53591	0.489919	0.648969	0.628947	-0.661955	1.25549	1.42007	0.702827	-0.905738	-0.746199	-1.3599	-0.425545	-1.16409	-1.48952	0.731073	1.11667	1.15384	0.895996	0.616611	-0.706416	autophagy;biological regulation;catabolic process;cell communication;cell differentiation;cell surface receptor linked signaling pathway;cellular catabolic process;cellular component assembly;cellular component organization;cellular component organization or biogenesis;cellular developmental process;cellular macromolecule catabolic process;cellular macromolecule metabolic process;cellular metabol…	binding;catalytic activity;cation binding;enzyme binding;identical protein binding;ion binding;kinase activity;kinase binding;metal ion binding;phosphotransferase activity, alcohol group as acceptor;protein binding;protein domain specific binding;protein kinase activity;protein kinase binding;protein kinase C binding;protein serine/threonine kinase activity;receptor binding;receptor tyrosine kina…	aggresome;autophagic vacuole;cell part;cytoplasm;cytoplasmic mRNA processing body;cytoplasmic part;cytoplasmic vesicle;cytosol;endoplasmic reticulum;endosome;extracellular membrane-bounded organelle;extracellular organelle;extracellular region part;extracellular vesicular exosome;inclusion body;intracellular membrane-bounded organelle;intracellular non-membrane-bounded organelle;intracellular org…	Osteoclast differentiation	+	S3_Pel_R4_Pel;S4_Pel_R4_Pel	0.927	1.86757	Q13501	Q13501_S272	SQSTM1	LTPVsPESSSTEEK;SRLtPVsPESSSTEEK;sRLTPVsPESSSTEEK
1.24672	0.912857	-0.292714	0.750513	0.435682	0.954733	-0.483627	-0.424844	-3.59322	-0.912109	-0.395623	-0.52312	0.931219	0.565524	-0.0204975	0.253214	0.298584	0.813077	-0.289129	-1.09034	-0.764621	-0.299529	0.0313637	-0.892543	0.840574	0.875537	1.03477	0.707493	0.188311	0.885511	-0.0907459	-1.00372	-1.05174	-0.0988161	1.89485	-1.3936	autophagy;biological regulation;catabolic process;cell communication;cell differentiation;cell surface receptor linked signaling pathway;cellular catabolic process;cellular component assembly;cellular component organization;cellular component organization or biogenesis;cellular developmental process;cellular macromolecule catabolic process;cellular macromolecule metabolic process;cellular metabol…	binding;catalytic activity;cation binding;enzyme binding;identical protein binding;ion binding;kinase activity;kinase binding;metal ion binding;phosphotransferase activity, alcohol group as acceptor;protein binding;protein domain specific binding;protein kinase activity;protein kinase binding;protein kinase C binding;protein serine/threonine kinase activity;receptor binding;receptor tyrosine kina…	aggresome;autophagic vacuole;cell part;cytoplasm;cytoplasmic mRNA processing body;cytoplasmic part;cytoplasmic vesicle;cytosol;endoplasmic reticulum;endosome;extracellular membrane-bounded organelle;extracellular organelle;extracellular region part;extracellular vesicular exosome;inclusion body;intracellular membrane-bounded organelle;intracellular non-membrane-bounded organelle;intracellular org…	Osteoclast differentiation	+	R1_Pel_S1_Pel;R3_Pel_S1_Pel;R4_Pel_S1_Pel	0.939	2.89226	Q13501	Q13501_T269	SQSTM1	LtPVSPESSSTEEK;SRLtPVSPESSSTEEK;SRLtPVsPESSSTEEK
2.48889	1.47119	1.1619	-0.215068	-0.297909	1.78986	-0.13837	-0.410301	-0.850038	-1.87832	-0.093829	1.0205	-0.340545	0.326462	0.127923	-1.06799	0.838539	0.459274	-0.0520802	-1.70888	-0.260583	-0.522715	-0.0945735	-0.271751	-0.928346	0.264644	0.153905	-0.68151	-2.2011	-0.228568	0.245056	0.270874	0.278494	-0.145979	2.00298	-0.51204	anatomical structure development;biological regulation;cell cycle;cellular macromolecule metabolic process;cellular metabolic process;cellular process;cellular protein metabolic process;circadian rhythm;developmental process;macromolecule metabolic process;macromolecule modification;metabolic process;mitotic cell cycle;negative regulation of biological process;negative regulation of cell communic…	adenyl nucleotide binding;adenyl ribonucleotide binding;ATP binding;binding;catalytic activity;cytoskeletal protein binding;kinase activity;non-membrane spanning protein tyrosine kinase activity;nucleotide binding;phosphotransferase activity, alcohol group as acceptor;protein binding;protein kinase activity;protein self-association;protein serine/threonine kinase activity;protein serine/threonine…	cell part;intracellular membrane-bounded organelle;intracellular organelle;intracellular organelle part;intracellular part;macromolecular complex;membrane-bounded organelle;nuclear body;nuclear part;nuclear speck;nucleoplasm;nucleoplasm part;nucleus;organelle;organelle part;ribonucleoprotein complex		+	R1_Pel_R4_Pel;R1_Pel_S3_Pel	0.916	1.69441	Q13627	Q13627_Y321	DYRK1A	IYQyIQSR
-0.865484	0.254077	-0.156302	-0.799881	-1.31733	-0.0188086	0.441339	0.254445	-0.430613	-1.14562	-0.564875	-0.408083	-0.705437	0.915389	-0.87738	0.659496	0.183431	1.18254	0.689325	-0.232835	-1.07708	-0.596071	-1.36925	-0.105754	0.577739	0.39935	-0.0841627	-0.623653	-1.89343	-0.134707	2.42058	1.20686	0.63982	0.283634	3.04603	0.252702	multicellular organismal process;muscle contraction;muscle system process;system process		adherens junction;anchoring junction;cell junction;cell part;cell-substrate adherens junction;cell-substrate junction;cytoplasm;cytoskeleton;dystrophin-associated glycoprotein complex;focal adhesion;intracellular non-membrane-bounded organelle;intracellular organelle;intracellular part;macromolecular complex;membrane;membrane part;non-membrane-bounded organelle;organelle;plasma membrane;plasma me…		+	S4_Pel_R1_Pel;S4_Pel_R4_Pel;S4_Pel_S1_Pel;S4_Pel_S3_Pel	0.918	2.24852	Q13884	Q13884_S219	SNTB1	GSPVSEIGWETPPPEsPR;GSPVSEIGWEtPPPEsPR;KGSPVSEIGWETPPPEsPR;KGSPVSEIGWEtPPPEsPR
-2.21396	-0.613485	-0.68719	-0.421735	-0.470716	-0.478071	0.232788	0.907375	0.648322	0.135401	0.580404	0.678233	-0.707326	0.129243	-2.96706	-0.274495	-0.187901	0.702744	0.162572	0.296804	0.0904873	0.371318	0.251878	0.190947	-0.621394	-0.734966	-0.415393	-0.988253	-1.05277	-0.625365	1.29229	1.46522	1.28085	0.697897	2.41706	0.928251	multicellular organismal process;muscle contraction;muscle system process;system process		adherens junction;anchoring junction;cell junction;cell part;cell-substrate adherens junction;cell-substrate junction;cytoplasm;cytoskeleton;dystrophin-associated glycoprotein complex;focal adhesion;intracellular non-membrane-bounded organelle;intracellular organelle;intracellular part;macromolecular complex;membrane;membrane part;non-membrane-bounded organelle;organelle;plasma membrane;plasma me…		+	S1_Pel_R1_Pel;S1_Pel_R4_Pel;S4_Pel_R1_Pel;S4_Pel_R3_Pel;S4_Pel_R4_Pel	1	5.021	Q13884	Q13884_S87	SNTB1	GAGAGHPGAGGAQPPDsPAGVR
-0.308283	-0.920257	-0.104405	-1.16766	-2.78442	-0.0648532	0.784929	1.23513	0.800265	0.409109	0.878004	1.16849	-1.01413	-1.94585	-1.5532	0.522314	0.353678	1.16614	-1.11754	0.482904	0.669927	0.476035	0.876307	0.767924	-1.0936	-1.27389	-0.912949	-0.262339	-0.368474	-0.11527	0.60645	0.77091	0.526867	0.662095	1.1273	0.722344	actin cytoskeleton organization;actin cytoskeleton reorganization;actin filament organization;actin filament polymerization;actin filament-based process;actin polymerization or depolymerization;anatomical structure morphogenesis;biological regulation;cell junction assembly;cell junction organization;cell motility;cell part morphogenesis;cell projection assembly;cell projection morphogenesis;cell …	binding;profilin binding;protein binding	adherens junction;anchoring junction;cell cortex;cell cortex part;cell junction;cell part;cell projection;cell projection part;cell-substrate adherens junction;cell-substrate junction;coated pit;cortical cytoskeleton;cytoplasm;cytoplasmic part;cytoskeletal part;cytoskeleton;dendritic spine;extracellular membrane-bounded organelle;extracellular organelle;extracellular region part;extracellular ves…	Bacterial invasion of epithelial cells;Pathogenic Escherichia coli infection;Shigellosis;Tight junction	+	S1_Pel_R1_Pel;S1_Pel_R4_Pel;S4_Pel_R1_Pel;S4_Pel_R4_Pel	0.933	3.11831	Q14247	Q14247_S405	CTTN	AKTQTPPVsPAPQPTEER;TQtPPVsPAPQPTEER;tQTPPVsPAPQPTEER
-0.549564	-0.0832619	-1.3842	-0.728073	-1.3023	-0.872078	0.935068	1.05151	1.08709	0.831087	1.07733	1.27419	-0.117837	-1.19847	-0.478655	-0.94846	0.148904	-1.34626	0.584921	-1.5332	-0.966896	0.934533	1.05638	0.729561	-1.15843	0.0321207	-0.420452	-0.913752	-1.15617	-1.22371	1.2249	1.11853	1.12187	0.911351	1.14012	1.1223	actin cytoskeleton organization;actin cytoskeleton reorganization;actin filament organization;actin filament polymerization;actin filament-based process;actin polymerization or depolymerization;anatomical structure morphogenesis;biological regulation;cell junction assembly;cell junction organization;cell motility;cell part morphogenesis;cell projection assembly;cell projection morphogenesis;cell …	binding;profilin binding;protein binding	adherens junction;anchoring junction;cell cortex;cell cortex part;cell junction;cell part;cell projection;cell projection part;cell-substrate adherens junction;cell-substrate junction;coated pit;cortical cytoskeleton;cytoplasm;cytoplasmic part;cytoskeletal part;cytoskeleton;dendritic spine;extracellular membrane-bounded organelle;extracellular organelle;extracellular region part;extracellular ves…	Bacterial invasion of epithelial cells;Pathogenic Escherichia coli infection;Shigellosis;Tight junction	+	S1_Pel_R1_Pel;S1_Pel_R3_Pel;S1_Pel_R4_Pel;S4_Pel_R1_Pel;S4_Pel_R3_Pel;S4_Pel_R4_Pel	0.92	6.36841	Q14247	Q14247_S418	CTTN	LPSsPVYEDAASFK;LPssPVyEDAASFK
0.417261	1.10065	0.608992	-0.54644	0.178175	0.461266	0.294193	2.17809	1.48805	0.175988	2.54688	-0.511766	-0.927736	-0.252973	-1.44093	0.390315	-1.08971	0.260483	-1.60998	-2.00396	-0.339688	-0.446153	1.22916	-0.396593	-0.745542	-0.550933	-1.18618	-1.28193	-0.3577	-0.116284	0.586325	-0.37211	0.722306	0.406758	0.476652	0.655069	anatomical structure development;cell development;cell junction assembly;cell junction organization;cellular component assembly;cellular component assembly at cellular level;cellular component organization;cellular component organization at cellular level;cellular component organization or biogenesis;cellular component organization or biogenesis at cellular level;cellular developmental process;ce…	ankyrin binding;binding;cytoskeletal protein binding;protein binding	adherens junction;anchoring junction;cell junction;cell part;cell-substrate adherens junction;cell-substrate junction;contractile fiber part;costamere;cytoplasm;cytoplasmic part;cytoskeleton;cytosol;focal adhesion;intracellular non-membrane-bounded organelle;intracellular organelle;intracellular part;membrane;non-membrane-bounded organelle;organelle;organelle part;plasma membrane;sarcolemma;sarco…	Focal adhesion;MAPK signaling pathway	+	S1_Pel_R3_Pel;S1_Pel_R4_Pel;S1_Pel_S3_Pel	0.884	2.41366	Q14315	Q14315_S2395	FLNC	FNDEHIPDsPFVVPVASLSDDAR
-1.27749	-0.981406	-0.266928	0.477997	0.838548	-0.902118	-1.25165	0.7528	-0.868022	0.141491	1.19659	-0.296432	-1.8242	0.132134	-1.09387	1.696	1.00642	-0.278714	-0.193908	-1.11973	-1.77757	0.317849	-0.246296	-1.44716	-0.217687	0.295758	0.730338	0.041067	0.785397	-0.500847	1.69331	0.982715	1.48131	0.11361	1.83501	0.0256872	actin filament-based movement;actin filament-based process;actin-mediated cell contraction;actin-myosin filament sliding;biological adhesion;cell adhesion;cellular component movement;cellular process;muscle filament sliding	structural constituent of muscle;structural molecule activity	cell part;cytoplasmic part;cytoskeletal part;cytosol;intracellular organelle part;intracellular part;macromolecular complex;myosin complex;myosin filament;organelle part;protein complex		+	S4_Pel_S3_Pel	0.941	1.34352	Q14324	Q14324_S44	MYBPC2	EAPPEDQsPTAEEPTGVFLK;EAPPEDQsPTAEEPTGVFLKK
0.425118	-0.52423	-3.05558	-0.904607	-1.98426	-0.633757	1.29496	0.629686	1.02948	0.471883	1.01646	1.37904	-0.482367	-0.248707	-0.595207	-0.429516	0.111484	-0.123591	0.655299	0.922275	0.353197	0.141396	0.777847	0.671454	-0.141302	-0.454382	-0.572106	-0.781302	-1.31414	-2.03443	0.844667	0.74908	0.931898	0.53672	0.49205	0.845507	apoptosis;cell death;cell junction assembly;cell junction organization;cell-substrate junction assembly;cellular component assembly;cellular component assembly at cellular level;cellular component disassembly;cellular component disassembly at cellular level;cellular component disassembly involved in apoptosis;cellular component organization;cellular component organization at cellular level;cellul…	ankyrin binding;binding;cytoskeletal protein binding;protein binding;structural constituent of muscle;structural molecule activity	adherens junction;anchoring junction;cell junction;cell part;cell-substrate adherens junction;cell-substrate junction;contractile fiber part;costamere;cytoplasm;cytoplasmic part;cytoskeleton;cytosol;extracellular membrane-bounded organelle;extracellular organelle;extracellular region part;extracellular vesicular exosome;focal adhesion;hemidesmosome;intermediate filament cytoskeleton;intracellular…		+	S1_Pel_R1_Pel;S1_Pel_R3_Pel;S1_Pel_R4_Pel;S3_Pel_R1_Pel;S3_Pel_R4_Pel;S4_Pel_R1_Pel;S4_Pel_R4_Pel	0.937	5.83646	Q15149	Q15149_S1047	PLEC	SWsLATFR
-0.0407454	-0.899339	-0.611807	-0.843233	-0.305654	-0.802458	-0.525769	1.74411	1.57007	-0.51099	1.64721	1.41706	-0.698363	-0.414812	-0.557679	-0.899448	-1.07084	-0.35874	-0.932321	0.826026	-0.792981	-0.577144	0.926582	-0.437248	-0.682631	-0.369107	-0.794665	-0.625257	-1.01463	-1.07833	1.03003	1.9123	1.91517	0.771167	0.962878	1.1216	apoptosis;cell death;cell junction assembly;cell junction organization;cell-substrate junction assembly;cellular component assembly;cellular component assembly at cellular level;cellular component disassembly;cellular component disassembly at cellular level;cellular component disassembly involved in apoptosis;cellular component organization;cellular component organization at cellular level;cellul…	ankyrin binding;binding;cytoskeletal protein binding;protein binding;structural constituent of muscle;structural molecule activity	adherens junction;anchoring junction;cell junction;cell part;cell-substrate adherens junction;cell-substrate junction;contractile fiber part;costamere;cytoplasm;cytoplasmic part;cytoskeleton;cytosol;extracellular membrane-bounded organelle;extracellular organelle;extracellular region part;extracellular vesicular exosome;focal adhesion;hemidesmosome;intermediate filament cytoskeleton;intracellular…		+	S1_Pel_R1_Pel;S1_Pel_R3_Pel;S1_Pel_R4_Pel;S4_Pel_R1_Pel;S4_Pel_R3_Pel;S4_Pel_R4_Pel;S4_Pel_S3_Pel	1	5.54258	Q15149	Q15149_S1435	PLEC	AQLEPVAsPAK
0.490167	-0.71194	-0.651761	-1.27426	-0.379955	-0.912387	0.0838735	-0.186265	0.0677381	-0.143361	1.21632	0.0251326	-0.916267	-0.71906	-0.969737	-1.47731	1.72291	1.29272	1.1495	-0.169842	0.142988	0.165585	0.475017	-0.5486	-0.532444	-0.364487	-0.827008	-0.880332	-1.22672	-0.43936	1.72189	0.469268	0.322758	0.66856	3.36529	-0.0486103	apoptosis;cell death;cell junction assembly;cell junction organization;cell-substrate junction assembly;cellular component assembly;cellular component assembly at cellular level;cellular component disassembly;cellular component disassembly at cellular level;cellular component disassembly involved in apoptosis;cellular component organization;cellular component organization at cellular level;cellul…	ankyrin binding;binding;cytoskeletal protein binding;protein binding;structural constituent of muscle;structural molecule activity	adherens junction;anchoring junction;cell junction;cell part;cell-substrate adherens junction;cell-substrate junction;contractile fiber part;costamere;cytoplasm;cytoplasmic part;cytoskeleton;cytosol;extracellular membrane-bounded organelle;extracellular organelle;extracellular region part;extracellular vesicular exosome;focal adhesion;hemidesmosome;intermediate filament cytoskeleton;intracellular…		+	S4_Pel_R1_Pel;S4_Pel_R4_Pel	1	1.82906	Q15149	Q15149_S1732	PLEC	sLQEEHVAVAQLR;tAQLERsLQEEHVAVAQLR
-2.45221	-0.12483	-0.182763	-0.184565	-0.22751	0.12905	0.212325	0.68465	0.585715	-0.498178	0.528115	0.695811	-0.0438127	0.763514	-0.380611	-0.284606	0.299603	0.663659	0.0642278	0.0748434	0.369406	0.237324	0.380598	0.228129	-0.0413878	-0.197609	-2.6826	-0.321652	-3.56562	0.338428	0.374978	1.29822	1.20279	0.243181	1.10919	0.704198	apoptosis;cell death;cell junction assembly;cell junction organization;cell-substrate junction assembly;cellular component assembly;cellular component assembly at cellular level;cellular component disassembly;cellular component disassembly at cellular level;cellular component disassembly involved in apoptosis;cellular component organization;cellular component organization at cellular level;cellul…	ankyrin binding;binding;cytoskeletal protein binding;protein binding;structural constituent of muscle;structural molecule activity	adherens junction;anchoring junction;cell junction;cell part;cell-substrate adherens junction;cell-substrate junction;contractile fiber part;costamere;cytoplasm;cytoplasmic part;cytoskeleton;cytosol;extracellular membrane-bounded organelle;extracellular organelle;extracellular region part;extracellular vesicular exosome;focal adhesion;hemidesmosome;intermediate filament cytoskeleton;intracellular…		+	S4_Pel_R4_Pel	0.909	2.13693	Q15149	Q15149_S4396	PLEC	SSSVGSSSSYPIsPAVSR;SSSVGsSSSYPIsPAVSR;SSsVGSSSSYPIsPAVSR;SsSVGSSSSYPIsPAVSR;sSSVGSSSSYPIsPAVSR
1.46228	1.01701	2.02752	0.352981	0.904154	1.56595	-0.533555	-1.38433	-1.88216	-1.701	-1.26955	0.367382	1.12863	0.591741	0.303313	-0.0227287	1.57064	0.935521	-0.337272	-0.819644	-0.41407	-0.869284	-1.32511	-0.407285	-0.0562146	0.462203	-0.0842907	-0.116836	-1.33994	0.66288	-1.2062	0.70029	-0.0787068	-0.74627	0.513683	0.0282633	apoptosis;cell death;cell junction assembly;cell junction organization;cell-substrate junction assembly;cellular component assembly;cellular component assembly at cellular level;cellular component disassembly;cellular component disassembly at cellular level;cellular component disassembly involved in apoptosis;cellular component organization;cellular component organization at cellular level;cellul…	ankyrin binding;binding;cytoskeletal protein binding;protein binding;structural constituent of muscle;structural molecule activity	adherens junction;anchoring junction;cell junction;cell part;cell-substrate adherens junction;cell-substrate junction;contractile fiber part;costamere;cytoplasm;cytoplasmic part;cytoskeleton;cytosol;extracellular membrane-bounded organelle;extracellular organelle;extracellular region part;extracellular vesicular exosome;focal adhesion;hemidesmosome;intermediate filament cytoskeleton;intracellular…		+	R1_Pel_R4_Pel;R1_Pel_S1_Pel;R1_Pel_S3_Pel;R1_Pel_S4_Pel;R3_Pel_S1_Pel;R3_Pel_S3_Pel	0.936	5.14168	Q15149	Q15149_S4613	PLEC	GYYsPYSVSGSGSTAGSR;GYYsPYSVSGSGsTAGSR;GYYsPYSVSGsGSTAGSR
1.66737	1.2214	0.543573	0.617436	0.684078	1.78396	-0.00639553	-0.77601	-0.820322	-0.602259	-0.261418	-0.825614	-0.839254	0.962598	0.554964	1.69834	0.956871	1.22394	0.493313	-1.1936	-0.836207	-0.25742	-0.677072	-0.238984	-1.15638	1.07095	1.32869	0.657877	-0.701965	-1.48406	-0.143071	-1.36966	-1.89549	-0.0395654	-0.497242	-0.843386	anatomical structure development;biological regulation;cardiac cell development;cardiac muscle cell development;cell development;cellular developmental process;cellular process;chordate embryonic development;developmental process;embryo development;embryo development ending in birth or egg hatching;in utero embryonic development;muscle cell development;muscle organ development;muscle structure de…	adenyl nucleotide binding;adenyl ribonucleotide binding;ATP binding;binding;catalytic activity;kinase activity;nucleotide binding;phosphotransferase activity, alcohol group as acceptor;protein kinase activity;protein serine/threonine kinase activity;purine nucleotide binding;purine ribonucleoside triphosphate binding;purine ribonucleotide binding;ribonucleotide binding;transferase activity;transf…	cell part;intracellular membrane-bounded organelle;intracellular organelle;intracellular part;membrane-bounded organelle;nucleus;organelle		+	R1_Pel_S1_Pel;R1_Pel_S3_Pel;R1_Pel_S4_Pel;R3_Pel_S4_Pel	0.93	3.20312	Q15772	Q15772_S549	SPEG	AVsPAAAQPPSPSSAEKPGDEPGRPR;AVsPAAAQPPsPSSAEKPGDEPGRPR
-2.03558	-2.07839	-0.272736	-0.277492	-0.159728	0.682387	0.556233	1.08346	0.524234	0.55968	0.551426	0.894877	-2.09444	0.324262	-1.23493	-0.0349928	-0.282136	0.00323979	0.519828	0.732419	0.627068	0.472058	0.600086	0.562963	-2.03253	0.471949	-0.185472	-0.249341	-2.56298	-0.0429035	0.926559	0.755179	0.708984	0.89268	0.253384	0.840689	anatomical structure development;biological regulation;cardiac cell development;cardiac muscle cell development;cell development;cellular developmental process;cellular process;chordate embryonic development;developmental process;embryo development;embryo development ending in birth or egg hatching;in utero embryonic development;muscle cell development;muscle organ development;muscle structure de…	adenyl nucleotide binding;adenyl ribonucleotide binding;ATP binding;binding;catalytic activity;kinase activity;nucleotide binding;phosphotransferase activity, alcohol group as acceptor;protein kinase activity;protein serine/threonine kinase activity;purine nucleotide binding;purine ribonucleoside triphosphate binding;purine ribonucleotide binding;ribonucleotide binding;transferase activity;transf…	cell part;intracellular membrane-bounded organelle;intracellular organelle;intracellular part;membrane-bounded organelle;nucleus;organelle		+	S1_Pel_R1_Pel;S1_Pel_R4_Pel;S4_Pel_R1_Pel;S4_Pel_R4_Pel	0.933	2.86608	Q15772	Q15772_S557	SPEG	AVSPAAAQPPsPSSAEKPGDEPGRPR;AVsPAAAQPPsPSSAEKPGDEPGRPR
0.407765	1.42105	1.70681	1.13862	1.1404	2.29344	-0.239426	0.239805	-0.450115	-1.11258	-0.825749	-0.216974	-0.518711	-0.482601	1.02694	0.453349	-0.210488	-0.388034	1.34686	0.885754	-0.849748	-0.342124	-0.98051	-1.71043	0.0261948	-0.802023	-0.83278	-0.719446	-1.22959	-0.687409	1.32698	-0.341614	-1.16292	1.44188	0.347195	-1.09977	anatomical structure development;biological regulation;cardiac cell development;cardiac muscle cell development;cell development;cellular developmental process;cellular process;chordate embryonic development;developmental process;embryo development;embryo development ending in birth or egg hatching;in utero embryonic development;muscle cell development;muscle organ development;muscle structure de…	adenyl nucleotide binding;adenyl ribonucleotide binding;ATP binding;binding;catalytic activity;kinase activity;nucleotide binding;phosphotransferase activity, alcohol group as acceptor;protein kinase activity;protein serine/threonine kinase activity;purine nucleotide binding;purine ribonucleoside triphosphate binding;purine ribonucleotide binding;ribonucleotide binding;transferase activity;transf…	cell part;intracellular membrane-bounded organelle;intracellular organelle;intracellular part;membrane-bounded organelle;nucleus;organelle		+	R1_Pel_R4_Pel;R1_Pel_S1_Pel;R1_Pel_S3_Pel	0.921	2.62575	Q15772	Q15772_S853	SPEG	TPTMKPsPSQNR
-0.957605	-1.1994	-0.702403	-0.703478	-1.02297	-0.719287	0.644962	1.37214	1.13119	0.619035	1.22476	1.23866	-1.17564	-0.105522	-1.11309	-0.71828	-0.934606	-0.539624	0.554847	1.07684	1.06892	0.651123	0.543624	0.532783	-0.840556	-1.07316	-0.942604	-1.11211	-1.57729	-1.04829	0.952087	1.66888	1.34174	0.751597	-0.123399	1.23612	actin cytoskeleton organization;actin filament organization;actin filament-based process;anatomical structure development;cellular component organization;cellular component organization at cellular level;cellular component organization or biogenesis;cellular component organization or biogenesis at cellular level;cellular process;cytoskeleton organization;developmental process;heart development;or…	binding;cation binding;ion binding;metal ion binding;structural constituent of muscle;structural molecule activity;transition metal ion binding;zinc ion binding	actin cytoskeleton;cell part;contractile fiber part;cytoplasm;cytoplasmic part;cytoskeleton;intracellular non-membrane-bounded organelle;intracellular organelle;intracellular part;non-membrane-bounded organelle;organelle;organelle part;Z disc		+	S1_Pel_R1_Pel;S1_Pel_R3_Pel;S1_Pel_R4_Pel;S3_Pel_R1_Pel;S3_Pel_R3_Pel;S3_Pel_R4_Pel;S4_Pel_R1_Pel;S4_Pel_R3_Pel;S4_Pel_R4_Pel	0.945	12.2613	Q53GG5	Q53GG5_S89	PDLIM3	GETHLWsPQVSEDGK;GETHLWsPQVsEDGK;IDRGETHLWsPQVSEDGK;IDRGETHLWsPQVsEDGK
-1.61793	-0.123848	-1.76243	-0.671533	0.464866	-1.30416	0.147392	0.741368	0.620253	0.28076	1.12946	0.847119	-1.93651	0.131135	-0.0174434	0.472722	0.575991	1.05056	0.244092	0.417121	0.555569	0.674756	0.434065	0.23448	-1.49327	-1.71472	-0.797984	-2.20386	-1.05306	0.241694	0.716282	1.17514	0.732805	0.558053	1.33771	0.913349	actin cytoskeleton organization;actin filament organization;actin filament-based process;anatomical structure development;cellular component organization;cellular component organization at cellular level;cellular component organization or biogenesis;cellular component organization or biogenesis at cellular level;cellular process;cytoskeleton organization;developmental process;heart development;or…	binding;cation binding;ion binding;metal ion binding;structural constituent of muscle;structural molecule activity;transition metal ion binding;zinc ion binding	actin cytoskeleton;cell part;contractile fiber part;cytoplasm;cytoplasmic part;cytoskeleton;intracellular non-membrane-bounded organelle;intracellular organelle;intracellular part;non-membrane-bounded organelle;organelle;organelle part;Z disc		+	R3_Pel_R4_Pel;S1_Pel_R1_Pel;S1_Pel_R4_Pel;S3_Pel_R1_Pel;S3_Pel_R4_Pel;S4_Pel_R1_Pel;S4_Pel_R4_Pel	0.945	4.49464	Q53GG5	Q53GG5_S93	PDLIM3	GETHLWSPQVsEDGK;GETHLWsPQVsEDGK;IDRGETHLWsPQVsEDGK
-0.495948	-0.557985	-1.48903	-1.28987	-1.42147	0.701944	0.88354	1.34408	1.0467	0.346159	1.17297	1.04301	-0.485917	0.204389	-0.891309	-1.39221	0.144714	-0.150681	0.796458	1.00589	0.840516	0.536272	0.981615	0.478489	-1.58298	-1.5403	-1.42402	-0.689052	-1.14352	-1.43396	0.888523	1.21985	0.769874	1.04395	0.119961	0.419356	biological regulation;biosynthetic process;cellular biosynthetic process;cellular macromolecule biosynthetic process;cellular macromolecule metabolic process;cellular metabolic process;cellular nitrogen compound metabolic process;cellular process;macromolecule biosynthetic process;macromolecule metabolic process;metabolic process;nitrogen compound metabolic process;nucleic acid metabolic process;…		cell part;cytoplasm;intracellular membrane-bounded organelle;intracellular organelle;intracellular part;membrane-bounded organelle;nucleus;organelle		+	S1_Pel_R1_Pel;S1_Pel_R3_Pel;S1_Pel_R4_Pel;S3_Pel_R1_Pel;S3_Pel_R3_Pel;S3_Pel_R4_Pel;S4_Pel_R1_Pel;S4_Pel_R3_Pel;S4_Pel_R4_Pel	0.892	8.33283	Q5SV97	Q5SV97_S242	PERM1	sPVQEDRPGPGLGLSTPVPVTEQGTDQIR
0.232451	0.222235	1.08929	0.979719	0.535467	0.862039	-0.829806	-0.929851	-1.10692	-0.551248	-0.234871	-1.20826	0.134882	0.455982	0.164501	1.0352	1.55584	1.54152	-0.246955	-1.28713	-1.44769	-0.11689	-1.1293	-1.16617	0.363454	0.502413	0.777225	0.146047	-2.3514	-0.1893	1.20155	-0.240043	-0.00201499	-0.558581	2.40441	-0.607796	actin cytoskeleton organization;actin filament-based process;actomyosin structure organization;biological regulation;cell surface receptor linked signaling pathway;cellular component organization;cellular component organization at cellular level;cellular component organization or biogenesis;cellular component organization or biogenesis at cellular level;cellular process;cellular response to stimu…	adenyl nucleotide binding;adenyl ribonucleotide binding;ankyrin binding;ATP binding;binding;catalytic activity;cation binding;cytoskeletal protein binding;enzyme regulator activity;GTPase regulator activity;guanyl-nucleotide exchange factor activity;ion binding;kinase activity;metal ion binding;nucleoside-triphosphatase regulator activity;nucleotide binding;phosphotransferase activity, alcohol gr…	cell part;contractile fiber;contractile fiber part;cytoplasmic part;cytosol;intracellular non-membrane-bounded organelle;intracellular organelle;intracellular part;M band;myofibril;non-membrane-bounded organelle;organelle;organelle part;Z disc		+	R1_Pel_S1_Pel;R1_Pel_S3_Pel;R3_Pel_S1_Pel;R3_Pel_S3_Pel	0.941	2.82143	Q5VST9	Q5VST9_S238	OBSCN	AEGAPAsPPSTGTR
-0.684666	-1.43084	-1.78128	-0.954554	-1.23456	-0.113972	1.05765	0.857854	1.00032	0.553107	0.994539	1.22811	-0.830511	-1.14245	-1.20267	-0.46731	-1.98597	0.836649	0.716119	0.597863	0.808208	0.692903	0.679528	0.837918	-0.585487	-0.495457	-1.16036	-0.821579	-0.559598	-1.05699	0.871682	1.01285	1.0502	0.659856	0.664739	1.38816	actin cytoskeleton organization;actin filament-based process;actomyosin structure organization;biological regulation;cell surface receptor linked signaling pathway;cellular component organization;cellular component organization at cellular level;cellular component organization or biogenesis;cellular component organization or biogenesis at cellular level;cellular process;cellular response to stimu…	adenyl nucleotide binding;adenyl ribonucleotide binding;ankyrin binding;ATP binding;binding;catalytic activity;cation binding;cytoskeletal protein binding;enzyme regulator activity;GTPase regulator activity;guanyl-nucleotide exchange factor activity;ion binding;kinase activity;metal ion binding;nucleoside-triphosphatase regulator activity;nucleotide binding;phosphotransferase activity, alcohol gr…	cell part;contractile fiber;contractile fiber part;cytoplasmic part;cytosol;intracellular non-membrane-bounded organelle;intracellular organelle;intracellular part;M band;myofibril;non-membrane-bounded organelle;organelle;organelle part;Z disc		+	S1_Pel_R1_Pel;S1_Pel_R3_Pel;S1_Pel_R4_Pel;S3_Pel_R1_Pel;S3_Pel_R3_Pel;S3_Pel_R4_Pel;S4_Pel_R1_Pel;S4_Pel_R3_Pel;S4_Pel_R4_Pel	0.933	8.68373	Q5VST9	Q5VST9_S395	OBSCN	NVsADDDAVYICETPEGSR
0.302323	0.582924	-0.414711	-0.477824	-0.764295	-0.202171	0.893798	0.464407	0.873874	1.01949	1.14607	1.11728	-0.682344	-1.61884	-0.647536	-0.397004	-0.8044	-0.648647	1.06212	0.581203	0.773009	0.877013	0.911239	0.591416	-1.46054	-0.948191	-0.982058	-0.454557	-2.56992	-1.58887	0.321062	1.04827	0.919137	0.870407	-1.11872	1.42557	actin cytoskeleton organization;actin filament-based process;actomyosin structure organization;biological regulation;cell surface receptor linked signaling pathway;cellular component organization;cellular component organization at cellular level;cellular component organization or biogenesis;cellular component organization or biogenesis at cellular level;cellular process;cellular response to stimu…	adenyl nucleotide binding;adenyl ribonucleotide binding;ankyrin binding;ATP binding;binding;catalytic activity;cation binding;cytoskeletal protein binding;enzyme regulator activity;GTPase regulator activity;guanyl-nucleotide exchange factor activity;ion binding;kinase activity;metal ion binding;nucleoside-triphosphatase regulator activity;nucleotide binding;phosphotransferase activity, alcohol gr…	cell part;contractile fiber;contractile fiber part;cytoplasmic part;cytosol;intracellular non-membrane-bounded organelle;intracellular organelle;intracellular part;M band;myofibril;non-membrane-bounded organelle;organelle;organelle part;Z disc		+	R1_Pel_R4_Pel;S1_Pel_R1_Pel;S1_Pel_R3_Pel;S1_Pel_R4_Pel;S3_Pel_R3_Pel;S3_Pel_R4_Pel;S4_Pel_R3_Pel;S4_Pel_R4_Pel	0.944	7.04596	Q5VST9	Q5VST9_S4076	OBSCN	LQsLEQETGDIAR
0.938432	0.70191	1.1363	0.540443	0.0728334	0.664821	-0.39037	-2.597	0.147647	0.147576	-3.38977	-0.110626	0.188069	-0.208043	0.272772	1.13698	0.39316	1.18057	-0.137494	0.192661	0.103129	0.662105	-0.225275	-0.105508	0.0847111	0.487158	0.903168	0.506207	-0.999648	0.279684	0.443042	-0.0961951	0.0280743	0.052515	-2.61485	-0.389195	actin cytoskeleton organization;actin filament-based process;actomyosin structure organization;biological regulation;cell surface receptor linked signaling pathway;cellular component organization;cellular component organization at cellular level;cellular component organization or biogenesis;cellular component organization or biogenesis at cellular level;cellular process;cellular response to stimu…	adenyl nucleotide binding;adenyl ribonucleotide binding;ankyrin binding;ATP binding;binding;catalytic activity;cation binding;cytoskeletal protein binding;enzyme regulator activity;GTPase regulator activity;guanyl-nucleotide exchange factor activity;ion binding;kinase activity;metal ion binding;nucleoside-triphosphatase regulator activity;nucleotide binding;phosphotransferase activity, alcohol gr…	cell part;contractile fiber;contractile fiber part;cytoplasmic part;cytosol;intracellular non-membrane-bounded organelle;intracellular organelle;intracellular part;M band;myofibril;non-membrane-bounded organelle;organelle;organelle part;Z disc		+	R1_Pel_S1_Pel	0.904	1.66621	Q5VST9	Q5VST9_S4787	OBSCN	LPQEAEEVAPDLSEGYsTADELAR
-0.163991	0.475161	-0.730627	-0.624788	-0.820771	-0.765296	0.10249	1.1457	0.918543	-0.342977	0.346491	1.52613	-0.557904	0.120617	-2.16515	-0.38144	-0.639695	1.03739	-0.0917135	0.576313	0.987458	0.713146	-0.330232	-0.0613795	-1.15754	-0.436181	-0.588833	-0.531262	-1.69487	-2.21403	1.14633	2.14065	1.155	-0.0239803	1.2966	0.634655	actin cytoskeleton organization;actin filament-based process;actomyosin structure organization;biological regulation;cell surface receptor linked signaling pathway;cellular component organization;cellular component organization at cellular level;cellular component organization or biogenesis;cellular component organization or biogenesis at cellular level;cellular process;cellular response to stimu…	adenyl nucleotide binding;adenyl ribonucleotide binding;ankyrin binding;ATP binding;binding;catalytic activity;cation binding;cytoskeletal protein binding;enzyme regulator activity;GTPase regulator activity;guanyl-nucleotide exchange factor activity;ion binding;kinase activity;metal ion binding;nucleoside-triphosphatase regulator activity;nucleotide binding;phosphotransferase activity, alcohol gr…	cell part;contractile fiber;contractile fiber part;cytoplasmic part;cytosol;intracellular non-membrane-bounded organelle;intracellular organelle;intracellular part;M band;myofibril;non-membrane-bounded organelle;organelle;organelle part;Z disc		+	S1_Pel_R4_Pel;S3_Pel_R4_Pel;S4_Pel_R1_Pel;S4_Pel_R3_Pel;S4_Pel_R4_Pel	0.933	3.81253	Q5VST9	Q5VST9_S5669	OBSCN	LKLsPEWGAAEAPEFPGEAVSEDEYK
1.77031	-0.269528	0.389142	0.00337948	-0.243358	0.125705	0.336592	0.215219	-0.309957	-1.40895	-1.18772	-0.381525	0.245103	0.0720202	-0.91088	-0.791726	0.368851	1.03348	1.1451	-0.138933	-0.622562	-0.325106	0.80454	-1.26207	-0.0465803	0.474615	-1.47113	-0.863776	-1.90668	-0.799121	0.696921	0.772315	0.637878	-0.636035	3.14205	1.3424	actin cytoskeleton organization;actin filament-based process;actomyosin structure organization;biological regulation;cell surface receptor linked signaling pathway;cellular component organization;cellular component organization at cellular level;cellular component organization or biogenesis;cellular component organization or biogenesis at cellular level;cellular process;cellular response to stimu…	adenyl nucleotide binding;adenyl ribonucleotide binding;ankyrin binding;ATP binding;binding;catalytic activity;cation binding;cytoskeletal protein binding;enzyme regulator activity;GTPase regulator activity;guanyl-nucleotide exchange factor activity;ion binding;kinase activity;metal ion binding;nucleoside-triphosphatase regulator activity;nucleotide binding;phosphotransferase activity, alcohol gr…	cell part;contractile fiber;contractile fiber part;cytoplasmic part;cytosol;intracellular non-membrane-bounded organelle;intracellular organelle;intracellular part;M band;myofibril;non-membrane-bounded organelle;organelle;organelle part;Z disc		+	S4_Pel_R4_Pel	0.939	1.492	Q5VST9	Q5VST9_S6831	OBSCN	GFLRPSAsLPEEAEASER;PSAsLPEEAEASER
0.0672661	-0.484983	0.0829905	-0.672472	-0.467345	-2.62437	0.694843	0.634654	0.836754	0.295587	0.522195	0.682563	-0.171047	-0.20069	-0.103709	-0.278639	-0.167334	0.827373	0.65701	0.499911	0.662267	0.403733	0.477621	0.286748	-0.263824	-0.381809	-2.33975	-0.55999	-3.3588	-0.61601	0.831949	1.08353	0.916974	0.344004	1.11095	0.771857	actin cytoskeleton organization;actin filament-based process;actomyosin structure organization;biological regulation;cell surface receptor linked signaling pathway;cellular component organization;cellular component organization at cellular level;cellular component organization or biogenesis;cellular component organization or biogenesis at cellular level;cellular process;cellular response to stimu…	adenyl nucleotide binding;adenyl ribonucleotide binding;ankyrin binding;ATP binding;binding;catalytic activity;cation binding;cytoskeletal protein binding;enzyme regulator activity;GTPase regulator activity;guanyl-nucleotide exchange factor activity;ion binding;kinase activity;metal ion binding;nucleoside-triphosphatase regulator activity;nucleotide binding;phosphotransferase activity, alcohol gr…	cell part;contractile fiber;contractile fiber part;cytoplasmic part;cytosol;intracellular non-membrane-bounded organelle;intracellular organelle;intracellular part;M band;myofibril;non-membrane-bounded organelle;organelle;organelle part;Z disc		+	R3_Pel_R4_Pel;S1_Pel_R1_Pel;S1_Pel_R4_Pel;S3_Pel_R4_Pel;S4_Pel_R1_Pel;S4_Pel_R4_Pel	0.93	4.25193	Q5VST9	Q5VST9_S6851	OBSCN	STEAPAPPAsPEGAGPPAAQGCVPR
0.299438	0.860123	1.76696	1.88673	0.217681	0.971182	-1.0341	-0.52335	-0.123931	-0.519981	-0.95614	-1.30089	-0.371337	-2.23955	0.482425	1.50358	0.843917	0.570061	-0.951512	-0.662367	-0.312302	0.74913	-0.953358	-0.640673	0.127503	0.431534	1.27232	1.26362	-1.68871	1.45766	-0.060324	-1.1745	-0.219789	-0.143275	-0.230615	-0.597162	actin cytoskeleton organization;actin filament-based process;actomyosin structure organization;biological regulation;cell surface receptor linked signaling pathway;cellular component organization;cellular component organization at cellular level;cellular component organization or biogenesis;cellular component organization or biogenesis at cellular level;cellular process;cellular response to stimu…	adenyl nucleotide binding;adenyl ribonucleotide binding;ankyrin binding;ATP binding;binding;catalytic activity;cation binding;cytoskeletal protein binding;enzyme regulator activity;GTPase regulator activity;guanyl-nucleotide exchange factor activity;ion binding;kinase activity;metal ion binding;nucleoside-triphosphatase regulator activity;nucleotide binding;phosphotransferase activity, alcohol gr…	cell part;contractile fiber;contractile fiber part;cytoplasmic part;cytosol;intracellular non-membrane-bounded organelle;intracellular organelle;intracellular part;M band;myofibril;non-membrane-bounded organelle;organelle;organelle part;Z disc		+	R1_Pel_S1_Pel	0.938	1.92286	Q5VST9	Q5VST9_T4813	OBSCN	AGtPSLVTYLK
-2.00497	-2.10588	0.8374	-2.37311	0.197069	0.576389	-0.593273	-0.515444	-1.99579	-0.261451	-2.07893	0.052765	0.165346	0.462553	0.509504	0.651688	0.985903	1.50306	-0.397206	0.10524	0.16861	0.639766	0.182448	0.0365568	-0.27839	0.759678	0.447292	0.602251	-0.08418	1.02476	-0.28886	0.283383	0.685899	0.264212	1.75031	0.0853964	actin cytoskeleton organization;actin filament-based process;actomyosin structure organization;biological regulation;cell surface receptor linked signaling pathway;cellular component organization;cellular component organization at cellular level;cellular component organization or biogenesis;cellular component organization or biogenesis at cellular level;cellular process;cellular response to stimu…	adenyl nucleotide binding;adenyl ribonucleotide binding;ankyrin binding;ATP binding;binding;catalytic activity;cation binding;cytoskeletal protein binding;enzyme regulator activity;GTPase regulator activity;guanyl-nucleotide exchange factor activity;ion binding;kinase activity;metal ion binding;nucleoside-triphosphatase regulator activity;nucleotide binding;phosphotransferase activity, alcohol gr…	cell part;contractile fiber;contractile fiber part;cytoplasmic part;cytosol;intracellular non-membrane-bounded organelle;intracellular organelle;intracellular part;M band;myofibril;non-membrane-bounded organelle;organelle;organelle part;Z disc		+	R3_Pel_R1_Pel;R3_Pel_S1_Pel	0.919	2.24102	Q5VST9	Q5VST9_T5569	OBSCN	LQVPGGDSDEDsKtPSASPR;LQVPGGDsDEDSKtPSAsPR;LQVPGGDsDEDSKtPsASPR
-0.0193816	-0.635732	-0.262461	-1.26311	-0.647616	-0.512276	0.984529	0.293473	0.78962	0.353016	1.74701	1.95907	-0.256222	-2.069	-0.831307	-1.04305	-0.267176	0.116332	0.740817	0.525709	1.0116	0.170819	0.81536	0.908941	-0.670245	-1.68165	-1.34116	-1.21197	-1.14268	-0.82579	0.499074	0.598335	1.88609	0.507426	-0.214549	0.988142		binding;identical protein binding;protein binding;protein dimerization activity;protein homodimerization activity	cell part;contractile fiber part;cytoplasmic part;intracellular part;M band;organelle part		+	S1_Pel_R1_Pel;S1_Pel_R3_Pel;S1_Pel_R4_Pel;S3_Pel_R1_Pel;S3_Pel_R3_Pel;S3_Pel_R4_Pel;S4_Pel_R1_Pel;S4_Pel_R3_Pel;S4_Pel_R4_Pel	0.941	6.72081	Q5VTT5	Q5VTT5_S90	MYOM3	QTsAVELEER;RQTsAVELEER
0.860961	-0.378577	-0.537354	-0.196615	0.685473	1.35135	-0.595978	-1.01453	-1.4476	-1.5505	-0.82715	-0.512963	0.278723	0.238726	-0.359427	0.73437	1.40082	1.77335	1.02631	-1.53022	-0.18951	-0.382003	0.4187	-0.155579	0.0543337	-0.159328	-0.572093	-0.472453	-1.63264	-0.0427381	1.57677	0.292528	-0.303677	-0.693235	2.92897	-0.0672315	biological regulation;negative regulation of biological process;negative regulation of cardiac muscle hypertrophy;negative regulation of multicellular organismal process;negative regulation of muscle hypertrophy;regulation of biological process;regulation of cardiac muscle hypertrophy;regulation of multicellular organismal process;regulation of muscle adaptation;regulation of muscle hypertrophy;r…	protein binding transcription factor activity;RNA polymerase II transcription factor binding transcription factor activity;RNA polymerase II transcription factor binding transcription factor activity involved in negative regulation of transcription;transcription factor binding transcription factor activity	cell part;envelope;intracellular organelle lumen;intracellular organelle part;intracellular part;membrane-enclosed lumen;nuclear body;nuclear envelope;nuclear lumen;nuclear part;nucleoplasm part;organelle envelope;organelle lumen;organelle part;PML body		+	R3_Pel_S1_Pel;S4_Pel_S1_Pel	0.925	1.89768	Q5VWP3	Q5VWP3_S135	MLIP	AEYVLIVDsEGEDEAASR
0.153165	0.0554693	-0.0820434	-0.801143	-0.000282079	-0.468684	0.630166	0.35319	0.0114875	-1.07754	1.07965	0.672527	-0.200288	0.253144	-0.994067	-0.585305	0.889741	1.59131	0.0828106	-0.630473	0.111445	-0.310911	0.403152	-0.0863651	-0.197953	-0.504152	-0.911376	-1.25378	-2.86499	-0.491269	1.13236	1.69812	0.261359	-0.83298	3.04491	-0.130403	biological regulation;negative regulation of biological process;negative regulation of cardiac muscle hypertrophy;negative regulation of multicellular organismal process;negative regulation of muscle hypertrophy;regulation of biological process;regulation of cardiac muscle hypertrophy;regulation of multicellular organismal process;regulation of muscle adaptation;regulation of muscle hypertrophy;r…	protein binding transcription factor activity;RNA polymerase II transcription factor binding transcription factor activity;RNA polymerase II transcription factor binding transcription factor activity involved in negative regulation of transcription;transcription factor binding transcription factor activity	cell part;envelope;intracellular organelle lumen;intracellular organelle part;intracellular part;membrane-enclosed lumen;nuclear body;nuclear envelope;nuclear lumen;nuclear part;nucleoplasm part;organelle envelope;organelle lumen;organelle part;PML body		+	S4_Pel_R4_Pel	0.937	1.61287	Q5VWP3	Q5VWP3_S67	MLIP	IPEESSDKsPETVNR
1.56935	0.844818	0.676429	0.198763	0.357849	0.540615	-0.408257	-0.985086	-1.29974	-1.5231	-1.1091	-1.7795	0.948426	0.600914	0.533708	0.845642	1.34145	1.44555	-0.241561	-1.93493	-0.645921	-0.376179	-0.98664	-0.987367	1.21319	0.655227	0.406695	0.414976	-0.250261	0.398186	0.732181	-0.611454	-0.392552	-0.921869	1.82493	-1.09536	actin cytoskeleton organization;actin filament-based process;axon guidance;biological regulation;biosynthetic process;cellular biosynthetic process;cellular component organization;cellular component organization at cellular level;cellular component organization or biogenesis;cellular component organization or biogenesis at cellular level;cellular macromolecule biosynthetic process;cellular macrom…	binding;cation binding;ion binding;metal ion binding;transition metal ion binding;zinc ion binding	actin cytoskeleton;cell part;contractile fiber;cytoplasmic part;cytoskeleton;intracellular non-membrane-bounded organelle;intracellular organelle;intracellular part;myofibril;non-membrane-bounded organelle;organelle	Axon guidance	+	R1_Pel_S1_Pel;R1_Pel_S3_Pel;R3_Pel_S1_Pel;R3_Pel_S3_Pel;R4_Pel_S1_Pel;R4_Pel_S3_Pel	0.932	5.33921	Q6H8Q1	Q6H8Q1_S476	ABLIM2	TNsPDLDTQSLSHSSGTDRDPLQR
-0.0260898	-0.101625	-0.486915	-0.875588	0.313426	-0.398032	-0.211375	0.591839	-0.409458	0.187364	1.46475	1.27088	-0.893898	-1.43701	-1.03935	-0.350767	-0.341659	-0.311308	0.032051	0.168061	0.967385	0.208037	-0.544421	0.569975	-0.35908	-0.752086	-0.245487	-0.914139	-3.00813	-0.968963	1.683	0.971864	1.88122	1.35222	1.60256	0.410749	cellular hyperosmotic response;cellular process;cellular response to abiotic stimulus;cellular response to osmotic stress;cellular response to stimulus;cellular response to stress;hyperosmotic response;multicellular organismal process;muscle contraction;muscle system process;response to abiotic stimulus;response to osmotic stress;response to stimulus;response to stress;skeletal muscle contraction…	actin binding;actin filament binding;binding;cytoskeletal protein binding;protein binding	actin filament;cell part;cytoskeletal part;intracellular organelle part;intracellular part;macromolecular complex;organelle part;protein complex		+	S1_Pel_R3_Pel;S1_Pel_R4_Pel;S3_Pel_R4_Pel;S4_Pel_R1_Pel;S4_Pel_R3_Pel;S4_Pel_R4_Pel	0.939	5.15155	Q6JBY9	Q6JBY9_S216	RCSD1	APGsPLSSEGAAGEGVR
1.28739	1.13393	0.459981	0.955967	0.689096	0.529735	0.192337	-1.35388	-0.119181	-0.223939	-1.41558	-1.32524	0.578594	-0.417417	0.699577	0.599562	0.592007	1.00262	-2.38207	-0.157016	-0.120594	0.140186	-1.18991	0.377933	0.53109	0.746422	1.19678	0.640119	-0.383304	1.33231	-1.96573	-1.76602	-0.359945	-0.105466	0.955054	-1.35538	actin cytoskeleton organization;actin filament capping;actin filament organization;actin filament-based process;actomyosin structure organization;anatomical structure formation involved in morphogenesis;biological regulation;cellular component assembly;cellular component assembly at cellular level;cellular component assembly involved in morphogenesis;cellular component organization;cellular compo…	binding;cytoskeletal protein binding;protein binding;tropomyosin binding	cell part;contractile fiber part;cytoplasmic part;cytoskeletal part;intracellular organelle part;intracellular part;organelle part;striated muscle thin filament		+	R1_Pel_S1_Pel;R1_Pel_S3_Pel;R1_Pel_S4_Pel;R4_Pel_S1_Pel;R4_Pel_S4_Pel	0.928	3.04942	Q6P5Q4	Q6P5Q4_S186	LMOD2	NTEsPAAIHPCGNPTVIEDALDK;NTEsPAAIHPCGNPTVIEDALDKIK
0.946986	1.23822	0.622153	0.728099	0.917798	0.76151	0.280036	-0.908199	-1.40187	-1.27602	-1.3895	-1.51271	0.708154	-1.1854	0.748202	0.680278	0.881705	0.963523	0.0617131	-1.38731	-1.02878	0.147983	0.320845	0.889084	0.54789	0.801904	-0.961045	1.0016	-1.42919	0.883491	-0.284298	-1.52021	0.0272941	-1.43454	1.67927	-0.118663	actin cytoskeleton organization;actin filament capping;actin filament organization;actin filament-based process;actomyosin structure organization;anatomical structure formation involved in morphogenesis;biological regulation;cellular component assembly;cellular component assembly at cellular level;cellular component assembly involved in morphogenesis;cellular component organization;cellular compo…	binding;cytoskeletal protein binding;protein binding;tropomyosin binding	cell part;contractile fiber part;cytoplasmic part;cytoskeletal part;intracellular organelle part;intracellular part;organelle part;striated muscle thin filament		+	R1_Pel_S1_Pel	0.928	1.91011	Q6P5Q4	Q6P5Q4_T384	LMOD2	GtPSSSPYVsPR;GtPSSsPYVSPR;GtPSSsPYVsPR
-0.434822	-0.627924	-1.18115	-0.989702	-0.841125	-0.443543	-0.864516	1.12818	-0.620589	0.776249	1.22924	1.3765	-1.02664	0.848822	-1.5141	-0.218709	-1.12303	1.29085	0.834574	0.9453	-0.993049	-0.924544	1.05525	0.701803	-0.988782	0.125383	-1.21694	-1.06743	-1.44422	0.756082	0.836679	1.55886	1.12638	-0.0391032	0.856007	1.11377	actin cytoskeleton organization;actin filament-based process;cellular component organization;cellular component organization at cellular level;cellular component organization or biogenesis;cellular component organization or biogenesis at cellular level;cellular process;cytoskeleton organization;organelle organization	actin binding;actin filament binding;binding;cytoskeletal protein binding;protein binding	actin cytoskeleton;cell part;cytoskeleton;intracellular non-membrane-bounded organelle;intracellular organelle;intracellular part;non-membrane-bounded organelle;organelle		+	S4_Pel_R1_Pel;S4_Pel_R4_Pel	0.924	1.98188	Q6QEF8	Q6QEF8_S424	CORO6	RSQsASDAPLSQQHTLETLLEEIK;SQsASDAPLSQQHTLETLLEEIK
-1.42956	-1.95058	-1.78427	-1.51211	-0.830079	0.374474	0.807453	0.860336	1.0184	0.400018	1.0531	0.626971	0.384029	0.609362	0.524546	-0.127958	0.957361	1.14537	0.557041	0.44277	0.540355	0.421219	0.755035	0.533915	0.477974	-1.37533	-0.917157	-2.04076	-0.43558	0.360403	0.724838	-1.39246	-1.49523	0.116637	1.27559	0.323883	actin cytoskeleton organization;actin filament-based process;actomyosin structure organization;anatomical structure development;biological regulation;cardiac cell development;cardiac muscle cell development;cell development;cellular chemical homeostasis;cellular component organization;cellular component organization at cellular level;cellular component organization or biogenesis;cellular componen…		adherens junction;anchoring junction;cell junction;cell-cell adherens junction;cell-cell junction;fascia adherens		+	R3_Pel_R1_Pel;S1_Pel_R1_Pel;S1_Pel_R4_Pel;S3_Pel_R1_Pel	0.936	3.64659	Q702N8	Q702N8_S138	XIRP1	KFEEGSFANsTDQEPTRPQPGGGDVR
-1.79473	0.348518	-0.788594	-1.24162	-1.6658	0.0435124	0.548151	1.55648	1.11863	-0.44836	1.06645	1.15382	-1.09642	0.419175	-0.792958	-0.865009	0.213561	1.46633	0.260665	0.475702	0.683946	0.687494	0.636985	-1.10193	-0.799048	-0.826614	-1.2402	-1.13358	-0.0889774	-0.983394	0.680487	1.20155	0.720024	-0.901405	1.88283	0.604308	actin cytoskeleton organization;actin filament-based process;actomyosin structure organization;anatomical structure development;biological regulation;cardiac cell development;cardiac muscle cell development;cell development;cellular chemical homeostasis;cellular component organization;cellular component organization at cellular level;cellular component organization or biogenesis;cellular componen…		adherens junction;anchoring junction;cell junction;cell-cell adherens junction;cell-cell junction;fascia adherens		+	S1_Pel_R1_Pel;S1_Pel_R4_Pel;S4_Pel_R1_Pel;S4_Pel_R4_Pel	0.926	2.81888	Q702N8	Q702N8_S1669	XIRP1	DSPSsPTFISIQSATR
-0.402778	-0.561627	0.0536772	-1.97059	-0.795271	-0.485201	0.932985	1.75747	1.25563	0.0101571	1.16467	1.26832	0.475368	1.55839	-1.19538	-1.18911	0.958266	0.145247	0.63652	0.937009	0.429812	0.2802	0.631379	0.23795	-0.674976	-0.56892	-0.580557	-2.36205	-1.70657	-1.11838	0.269424	1.13532	-0.234716	-0.322499	-0.458435	0.489291	actin cytoskeleton organization;actin filament-based process;actomyosin structure organization;anatomical structure development;biological regulation;cardiac cell development;cardiac muscle cell development;cell development;cellular chemical homeostasis;cellular component organization;cellular component organization at cellular level;cellular component organization or biogenesis;cellular componen…		adherens junction;anchoring junction;cell junction;cell-cell adherens junction;cell-cell junction;fascia adherens		+	R3_Pel_R4_Pel;S1_Pel_R1_Pel;S1_Pel_R4_Pel;S3_Pel_R4_Pel;S4_Pel_R4_Pel	0.94	4.06664	Q702N8	Q702N8_S205	XIRP1	LGsRPSLQEQSPLELR;LGsRPSLQEQsPLELR;LGsRPsLQEQSPLELR
-0.0724801	-0.377053	-0.453928	-1.78705	-1.18736	-0.693664	1.09674	1.69844	1.23665	-0.0453165	1.67282	1.60148	-0.285633	1.22377	-1.05661	-0.649642	0.395151	0.0650391	0.320551	0.948375	0.630224	0.240691	0.956982	0.267729	-0.747643	-0.567668	-0.632551	-1.78759	-1.85253	-1.26933	0.118921	1.60276	-0.478331	-0.348736	-0.327753	0.544535	actin cytoskeleton organization;actin filament-based process;actomyosin structure organization;anatomical structure development;biological regulation;cardiac cell development;cardiac muscle cell development;cell development;cellular chemical homeostasis;cellular component organization;cellular component organization at cellular level;cellular component organization or biogenesis;cellular componen…		adherens junction;anchoring junction;cell junction;cell-cell adherens junction;cell-cell junction;fascia adherens		+	S1_Pel_R1_Pel;S1_Pel_R3_Pel;S1_Pel_R4_Pel;S3_Pel_R1_Pel;S3_Pel_R4_Pel;S4_Pel_R4_Pel	0.94	5.14104	Q702N8	Q702N8_S208	XIRP1	LGSRPsLQEQSPLELR;LGSRPsLQEQsPLELR;LGsRPsLQEQSPLELR;PsLQEQSPLELR
-1.38133	-1.04009	-0.456346	-0.890307	-0.742258	-0.696011	1.00287	1.70947	1.56398	-0.0357131	1.37016	1.36381	-1.65143	-0.990376	0.104235	-1.29175	-0.751332	-0.244519	0.416171	0.976926	0.868722	0.362976	0.937829	0.364	-0.36536	-0.661371	-0.623358	-1.21594	-1.41094	-0.659789	0.584271	1.58389	1.20099	0.246168	-0.641361	1.09311	actin cytoskeleton organization;actin filament-based process;actomyosin structure organization;anatomical structure development;biological regulation;cardiac cell development;cardiac muscle cell development;cell development;cellular chemical homeostasis;cellular component organization;cellular component organization at cellular level;cellular component organization or biogenesis;cellular componen…		adherens junction;anchoring junction;cell junction;cell-cell adherens junction;cell-cell junction;fascia adherens		+	S1_Pel_R1_Pel;S1_Pel_R3_Pel;S1_Pel_R4_Pel;S3_Pel_R1_Pel;S3_Pel_R3_Pel;S3_Pel_R4_Pel;S4_Pel_R1_Pel;S4_Pel_R3_Pel;S4_Pel_R4_Pel	0.938	7.26066	Q702N8	Q702N8_S213	XIRP1	LGSRPSLQEQsPLELR;LGSRPsLQEQsPLELR;LGsRPSLQEQsPLELR;PSLQEQsPLELR
-0.127653	0.101192	-0.315308	-2.8462	-0.543809	-0.0388986	0.52158	1.20391	0.93375	0.215789	1.13027	1.05937	-0.0177357	0.58767	-0.896833	-1.21363	0.236164	0.452326	0.355051	0.845978	0.56906	0.223092	0.731736	0.389138	-2.67003	-0.296867	-0.262362	-2.52653	-0.587939	-0.569318	0.333446	1.09243	0.476315	0.275946	0.657125	0.521781	actin cytoskeleton organization;actin filament-based process;actomyosin structure organization;anatomical structure development;biological regulation;cardiac cell development;cardiac muscle cell development;cell development;cellular chemical homeostasis;cellular component organization;cellular component organization at cellular level;cellular component organization or biogenesis;cellular componen…		adherens junction;anchoring junction;cell junction;cell-cell adherens junction;cell-cell junction;fascia adherens		+	S1_Pel_R1_Pel;S1_Pel_R4_Pel;S3_Pel_R4_Pel;S4_Pel_R4_Pel	0.941	3.48693	Q702N8	Q702N8_S295	XIRP1	GIsLEEGARPDVSATR
-1.46663	0.231484	-0.660244	-1.23697	-1.24489	-0.596432	0.567926	1.57758	1.49466	0.1089	1.77307	1.29214	-1.08526	-0.237627	-1.26277	-1.07589	-0.247851	0.86719	0.0725651	0.62947	0.770357	0.42509	0.682772	0.227416	-0.508125	-0.953607	-1.00521	-1.34338	-1.3255	-1.27621	0.282467	1.44506	1.16503	0.224953	1.15271	0.535749	actin cytoskeleton organization;actin filament-based process;actomyosin structure organization;anatomical structure development;biological regulation;cardiac cell development;cardiac muscle cell development;cell development;cellular chemical homeostasis;cellular component organization;cellular component organization at cellular level;cellular component organization or biogenesis;cellular componen…		adherens junction;anchoring junction;cell junction;cell-cell adherens junction;cell-cell junction;fascia adherens		+	S1_Pel_R1_Pel;S1_Pel_R3_Pel;S1_Pel_R4_Pel;S3_Pel_R1_Pel;S3_Pel_R4_Pel;S4_Pel_R1_Pel;S4_Pel_R3_Pel;S4_Pel_R4_Pel	0.927	6.94126	Q702N8	Q702N8_S481	XIRP1	EEGTDSAGQAQGIGsPVYAMQDSK
-0.286171	-0.857967	-0.687911	-0.69969	-0.653983	-0.757736	1.14475	1.83658	0.766108	0.898225	-1.27442	1.48457	-1.37658	-0.375472	-0.999843	-0.463679	-0.762579	-0.735677	0.965076	1.37393	1.23604	-1.15689	1.0695	0.970319	-0.560832	-0.418714	-1.04835	-0.732921	-1.47391	-0.742432	1.03747	-0.560156	1.24842	0.842178	0.62698	1.12577	actin cytoskeleton organization;actin filament-based process;actomyosin structure organization;anatomical structure development;biological regulation;cardiac cell development;cardiac muscle cell development;cell development;cellular chemical homeostasis;cellular component organization;cellular component organization at cellular level;cellular component organization or biogenesis;cellular componen…		adherens junction;anchoring junction;cell junction;cell-cell adherens junction;cell-cell junction;fascia adherens		+	S1_Pel_R1_Pel;S1_Pel_R3_Pel;S1_Pel_R4_Pel;S3_Pel_R1_Pel;S3_Pel_R3_Pel;S3_Pel_R4_Pel;S4_Pel_R1_Pel;S4_Pel_R3_Pel;S4_Pel_R4_Pel	0.797	4.48596	Q702N8	Q702N8_S529	XIRP1	SPsTIDVVR
-0.82913	-1.26079	-0.228015	-1.14339	-0.912135	-0.860807	1.0084	0.761467	0.935983	0.598205	1.18024	1.0198	-0.782792	-0.411643	-0.949815	-1.45201	-0.435491	0.0625027	0.954432	0.84972	1.00301	0.530304	0.864604	0.516238	-0.567292	-0.902444	-1.06852	-1.41153	-1.99472	-1.26711	1.18993	1.4336	1.09488	0.65937	0.904997	0.909949	actin cytoskeleton organization;actin filament-based process;actomyosin structure organization;cellular component organization;cellular component organization at cellular level;cellular component organization or biogenesis;cellular component organization or biogenesis at cellular level;cellular process;cytoskeleton organization;organelle organization;sarcomere organization	actinin binding;alpha-actinin binding;binding;cytoskeletal protein binding;muscle alpha-actinin binding;protein binding;protein domain specific binding;SH3 domain binding	cell part;contractile fiber part;cytoplasmic part;I band;intracellular membrane-bounded organelle;intracellular organelle;intracellular part;membrane-bounded organelle;nucleus;organelle;organelle part;Z disc		+	S1_Pel_R1_Pel;S1_Pel_R3_Pel;S1_Pel_R4_Pel;S3_Pel_R1_Pel;S3_Pel_R3_Pel;S3_Pel_R4_Pel;S4_Pel_R1_Pel;S4_Pel_R3_Pel;S4_Pel_R4_Pel	0.931	12.5295	Q86TC9	Q86TC9_S643	MYPN	TPEPsSPVKEPPPVLAK;TPEPsSPVKEPPPVLAKPK
-0.982877	-1.22387	-0.488584	-0.996518	-1.06647	-0.727582	0.810099	0.850954	0.925721	0.54244	1.27789	1.15057	-1.05881	-0.529583	-1.02218	-0.771641	-0.39009	0.13649	0.755587	0.684732	1.14719	0.815585	0.984133	0.561135	-0.780764	-1.01954	-1.03423	-1.26206	-2.26547	-1.00365	1.2475	1.12582	1.03703	0.632732	0.930176	1.00813	actin cytoskeleton organization;actin filament-based process;actomyosin structure organization;cellular component organization;cellular component organization at cellular level;cellular component organization or biogenesis;cellular component organization or biogenesis at cellular level;cellular process;cytoskeleton organization;organelle organization;sarcomere organization	actinin binding;alpha-actinin binding;binding;cytoskeletal protein binding;muscle alpha-actinin binding;protein binding;protein domain specific binding;SH3 domain binding	cell part;contractile fiber part;cytoplasmic part;I band;intracellular membrane-bounded organelle;intracellular organelle;intracellular part;membrane-bounded organelle;nucleus;organelle;organelle part;Z disc		+	R3_Pel_R4_Pel;S1_Pel_R1_Pel;S1_Pel_R3_Pel;S1_Pel_R4_Pel;S3_Pel_R1_Pel;S3_Pel_R3_Pel;S3_Pel_R4_Pel;S4_Pel_R1_Pel;S4_Pel_R3_Pel;S4_Pel_R4_Pel	0.94	13.2859	Q86TC9	Q86TC9_S644	MYPN	TPEPSsPVKEPPPVLAK;TPEPSsPVKEPPPVLAKPK
-0.82501	-1.32709	-0.732652	-1.21446	-1.23698	0.0813261	0.50916	1.02743	1.05168	0.682068	1.24354	1.09404	-1.88666	1.08585	-0.298752	-0.255764	-1.38709	0.604956	0.385753	-1.12323	1.02924	0.813442	0.913153	-1.15144	-0.136391	-1.06053	-0.420545	-0.786216	-1.21531	-1.24974	0.867953	1.42862	1.10453	0.687879	0.825008	0.872211	actin cytoskeleton organization;actin filament-based process;actomyosin structure organization;cellular component organization;cellular component organization at cellular level;cellular component organization or biogenesis;cellular component organization or biogenesis at cellular level;cellular process;cytoskeleton organization;organelle organization;sarcomere organization	actinin binding;alpha-actinin binding;binding;cytoskeletal protein binding;muscle alpha-actinin binding;protein binding;protein domain specific binding;SH3 domain binding	cell part;contractile fiber part;cytoplasmic part;I band;intracellular membrane-bounded organelle;intracellular organelle;intracellular part;membrane-bounded organelle;nucleus;organelle;organelle part;Z disc		+	S1_Pel_R1_Pel;S1_Pel_R3_Pel;S1_Pel_R4_Pel;S4_Pel_R1_Pel;S4_Pel_R3_Pel;S4_Pel_R4_Pel	0.888	4.26846	Q86TC9	Q86TC9_S684	MYPN	LDSTQLQQLHNQVLLEQHQLQNPPPSsPK
-0.34274	-1.30042	0.575936	-0.47802	0.390106	0.0496503	0.486829	-0.689526	-0.60917	-0.28627	1.08928	0.835827	-0.479045	-1.64289	-0.83405	0.228131	0.895993	1.35572	0.322723	-1.18934	0.355146	0.106486	0.504303	-0.387905	-0.817774	-0.323181	-1.21759	-0.252307	-2.39235	-0.367518	1.44732	0.0362827	0.695011	0.306587	3.07783	0.850927	actin cytoskeleton organization;actin filament-based process;actomyosin structure organization;cellular component organization;cellular component organization at cellular level;cellular component organization or biogenesis;cellular component organization or biogenesis at cellular level;cellular process;cytoskeleton organization;organelle organization;sarcomere organization	actinin binding;alpha-actinin binding;binding;cytoskeletal protein binding;muscle alpha-actinin binding;protein binding;protein domain specific binding;SH3 domain binding	cell part;contractile fiber part;cytoplasmic part;I band;intracellular membrane-bounded organelle;intracellular organelle;intracellular part;membrane-bounded organelle;nucleus;organelle;organelle part;Z disc		+	S4_Pel_R4_Pel	0.933	1.67253	Q86TC9	Q86TC9_S928	MYPN	TPVDEsDDEIQHDEIPTGK
-0.0570344	0.366339	0.639795	-1.32849	0.238112	0.390753	0.955389	0.658466	0.413563	-0.979994	0.752602	1.36956	0.164609	1.84715	-0.534218	-0.66604	0.241827	0.448587	-0.374956	-0.328089	0.823048	-0.404384	-0.0700948	-0.0843102	-1.9273	-0.887364	-0.800162	-0.991046	-2.15485	-0.635861	2.02772	2.27978	0.106431	-1.17089	-0.401642	0.0729969		actin binding;actinin binding;alpha-actinin binding;binding;cation binding;cytoskeletal protein binding;ion binding;metal ion binding;muscle alpha-actinin binding;protein binding;transition metal ion binding;zinc ion binding	adherens junction;anchoring junction;cell junction;cell-cell adherens junction;cell-cell junction;cell-substrate adherens junction;cell-substrate junction;fascia adherens;muscle tendon junction		+	S1_Pel_R4_Pel;S4_Pel_R4_Pel	0.94	1.8169	Q86VF7	Q86VF7_S152	NRAP	KsLGEEYTEDYEQPR;sLGEEYTEDYEQPR
-0.620016	-0.520239	-0.631295	-0.782839	-0.479751	0.607817	1.04122	1.58472	-1.05901	0.764878	-1.32516	1.42225	-0.584784	-1.31978	-0.795215	0.261564	-0.88871	-0.400937	-1.03529	1.07873	1.29197	1.04736	-0.218844	-0.279626	-0.647939	-0.730271	-0.192242	-1.35105	-1.37817	-0.976347	1.46847	1.47537	1.20728	0.876088	0.608793	1.48102	biological regulation;negative regulation of biological process;negative regulation of calcineurin-NFAT signaling pathway;negative regulation of calcium-mediated signaling;negative regulation of catalytic activity;negative regulation of cell communication;negative regulation of cellular process;negative regulation of hydrolase activity;negative regulation of molecular function;negative regulation…		cell part;contractile fiber part;costamere;cytoplasmic part;intracellular part;M band;organelle part;perinuclear region of cytoplasm		+	S4_Pel_R1_Pel;S4_Pel_R3_Pel;S4_Pel_R4_Pel	1	3.39094	Q8N3K9	Q8N3K9_S1283	CMYA5	NEPEVIKPYsPLK;NEPEVIKPysPLK
-0.463751	-0.79639	-0.781872	-0.747206	-1.01302	-0.724694	1.24724	-0.0598712	-0.375065	1.02024	-1.22197	1.19456	-0.362161	1.25337	-0.800866	-0.391326	-1.17355	-0.496685	1.25808	1.27718	1.16432	1.14909	1.26831	-0.840997	-0.92853	-1.31814	-1.02151	-0.503795	-0.944608	-0.794934	1.46068	1.75603	-0.650294	1.25997	0.246005	0.85617	biological regulation;negative regulation of biological process;negative regulation of calcineurin-NFAT signaling pathway;negative regulation of calcium-mediated signaling;negative regulation of catalytic activity;negative regulation of cell communication;negative regulation of cellular process;negative regulation of hydrolase activity;negative regulation of molecular function;negative regulation…		cell part;contractile fiber part;costamere;cytoplasmic part;intracellular part;M band;organelle part;perinuclear region of cytoplasm		+	S3_Pel_R1_Pel;S3_Pel_R4_Pel;S4_Pel_R1_Pel;S4_Pel_R4_Pel	1	3.53405	Q8N3K9	Q8N3K9_S1717	CMYA5	EESQNEEIKPFsPK;EEsQNEEIKPFsPK
-1.14752	-1.41642	-1.09021	-0.892119	-1.71439	0.148211	0.514334	1.1755	0.695651	0.267711	0.955074	1.17212	-1.59162	0.278835	-1.17902	0.300559	-0.124243	0.217216	0.582041	1.1255	0.72779	0.425811	0.438012	0.528954	-0.874899	-1.48909	-1.0593	-1.28876	-0.566006	-1.23046	0.900719	1.57252	1.76221	0.698256	0.332333	0.844689	biological regulation;negative regulation of biological process;negative regulation of calcineurin-NFAT signaling pathway;negative regulation of calcium-mediated signaling;negative regulation of catalytic activity;negative regulation of cell communication;negative regulation of cellular process;negative regulation of hydrolase activity;negative regulation of molecular function;negative regulation…		cell part;contractile fiber part;costamere;cytoplasmic part;intracellular part;M band;organelle part;perinuclear region of cytoplasm		+	S1_Pel_R1_Pel;S1_Pel_R3_Pel;S1_Pel_R4_Pel;S3_Pel_R1_Pel;S3_Pel_R3_Pel;S3_Pel_R4_Pel;S4_Pel_R1_Pel;S4_Pel_R3_Pel;S4_Pel_R4_Pel	0.927	7.69213	Q8N3K9	Q8N3K9_S2207	CMYA5	VAEQEDLETQPsPSVEK
-2.48889	-0.316275	-0.129378	-1.53409	-0.583801	-0.0200468	0.0413814	1.55286	0.952375	-0.134671	0.885558	1.0686	-0.532521	0.241095	-0.915224	0.207343	-0.367134	0.7774	0.122648	0.652914	0.725044	0.107424	0.0951415	0.0153456	-0.216244	-0.47422	-0.402215	-1.07666	-2.68655	-1.06639	0.971652	1.83581	1.43934	0.38278	-0.244312	1.1139	biological regulation;negative regulation of biological process;negative regulation of calcineurin-NFAT signaling pathway;negative regulation of calcium-mediated signaling;negative regulation of catalytic activity;negative regulation of cell communication;negative regulation of cellular process;negative regulation of hydrolase activity;negative regulation of molecular function;negative regulation…		cell part;contractile fiber part;costamere;cytoplasmic part;intracellular part;M band;organelle part;perinuclear region of cytoplasm		+	S1_Pel_R1_Pel;S1_Pel_R4_Pel;S4_Pel_R1_Pel;S4_Pel_R4_Pel	0.931	3.73383	Q8N3K9	Q8N3K9_S767	CMYA5	TSECQsPLPSTATSEHVVPSEGEDLGSER
-0.632725	-1.07495	-0.961554	-0.818783	-1.09156	-0.664319	-0.03023	-0.366464	0.844269	1.20189	1.72489	1.89793	-0.982635	-1.50929	-0.802175	-0.72793	-0.50374	-0.100713	1.16682	0.0636173	1.21998	0.859729	0.894126	0.849427	-0.951635	-1.03335	-1.02538	-0.716047	-1.22038	-0.830677	0.589983	0.571311	0.897212	1.76728	0.510454	0.985623	biological regulation;positive regulation of actin filament bundle assembly;positive regulation of biological process;positive regulation of cellular component organization;positive regulation of cellular process;positive regulation of cytoskeleton organization;positive regulation of organelle organization;regulation of actin cytoskeleton organization;regulation of actin filament bundle assembly;…	actin binding;binding;cytoskeletal protein binding;protein binding	actin cytoskeleton;actin filament bundle;actomyosin;cell junction;cell part;cell projection;cell projection part;cell-cell junction;cytoplasm;cytoskeletal part;cytoskeleton;dendritic spine;intracellular non-membrane-bounded organelle;intracellular organelle;intracellular organelle part;intracellular part;membrane;neuron projection;neuron spine;non-membrane-bounded organelle;occluding junction;org…		+	S1_Pel_R1_Pel;S1_Pel_R3_Pel;S1_Pel_R4_Pel;S3_Pel_R1_Pel;S3_Pel_R3_Pel;S3_Pel_R4_Pel;S4_Pel_R1_Pel;S4_Pel_R3_Pel;S4_Pel_R4_Pel	0.944	8.34095	Q8N3V7	Q8N3V7_S263	SYNPO	VAsEEEEVPLVVYLK
-0.86668	-0.320216	-1.00515	-0.912095	-1.41891	-0.40308	0.82691	1.64035	0.666578	-0.0676163	1.04065	1.45255	-1.05738	-1.26614	-0.17037	-0.838366	-0.431599	-0.972783	0.813021	1.01961	0.855512	0.531492	0.431118	0.299829	-1.31258	-0.321258	-1.24738	-0.00566631	-1.16575	-1.64552	0.635379	1.48819	2.06822	0.280263	0.405109	0.973769	biological regulation;positive regulation of actin filament bundle assembly;positive regulation of biological process;positive regulation of cellular component organization;positive regulation of cellular process;positive regulation of cytoskeleton organization;positive regulation of organelle organization;regulation of actin cytoskeleton organization;regulation of actin filament bundle assembly;…	actin binding;binding;cytoskeletal protein binding;protein binding	actin cytoskeleton;actin filament bundle;actomyosin;cell junction;cell part;cell projection;cell projection part;cell-cell junction;cytoplasm;cytoskeletal part;cytoskeleton;dendritic spine;intracellular non-membrane-bounded organelle;intracellular organelle;intracellular organelle part;intracellular part;membrane;neuron projection;neuron spine;non-membrane-bounded organelle;occluding junction;org…		+	S1_Pel_R1_Pel;S1_Pel_R3_Pel;S1_Pel_R4_Pel;S3_Pel_R1_Pel;S3_Pel_R3_Pel;S3_Pel_R4_Pel;S4_Pel_R1_Pel;S4_Pel_R3_Pel;S4_Pel_R4_Pel	0.922	7.81051	Q8N3V7	Q8N3V7_S819	SYNPO	PSLFVLsPIKEPAK;QPPYQLRPSLFVLsPIKEPAK
0.996117	0.237399	0.854543	0.907571	-0.121126	0.213112	0.733232	-2.54465	-0.102937	-0.338796	-1.9072	-1.68024	0.454063	0.0265681	0.480178	1.41095	0.410345	0.604325	0.12761	-1.28048	-0.307834	0.00655497	-1.395	0.345584	0.922606	0.482444	0.600345	1.15101	0.991061	0.712176	-0.488448	-2.35778	-0.884027	0.545013	-0.53718	0.732885	biological regulation;positive regulation of actin filament bundle assembly;positive regulation of biological process;positive regulation of cellular component organization;positive regulation of cellular process;positive regulation of cytoskeleton organization;positive regulation of organelle organization;regulation of actin cytoskeleton organization;regulation of actin filament bundle assembly;…	actin binding;binding;cytoskeletal protein binding;protein binding	actin cytoskeleton;actin filament bundle;actomyosin;cell junction;cell part;cell projection;cell projection part;cell-cell junction;cytoplasm;cytoskeletal part;cytoskeleton;dendritic spine;intracellular non-membrane-bounded organelle;intracellular organelle;intracellular organelle part;intracellular part;membrane;neuron projection;neuron spine;non-membrane-bounded organelle;occluding junction;org…		+	R1_Pel_S1_Pel;R3_Pel_S1_Pel;R4_Pel_S1_Pel	0.922	2.64516	Q8N3V7	Q8N3V7_S863	SYNPO	sSPGLYTSPGQDSLQPTAVSPPYGGDISPVSPSR;sSPGLYTSPGQDSLQPTAVSPPYGGDIsPVSPSR
0.594095	-0.491984	-0.215217	-0.378388	-0.244178	-0.581462	1.71931	0.114892	-1.57326	-0.0173686	0.214551	0.651702	-2.91949	-0.0892306	-0.365226	0.112792	-0.916657	-0.0573122	1.036	0.655407	0.885773	1.18627	0.88778	2.07961	-1.18881	-0.744416	0.13662	-0.41247	-1.02013	-0.486959	0.675027	0.320959	0.457946	0.969648	-1.90064	0.904812	biological regulation;positive regulation of actin filament bundle assembly;positive regulation of biological process;positive regulation of cellular component organization;positive regulation of cellular process;positive regulation of cytoskeleton organization;positive regulation of organelle organization;regulation of actin cytoskeleton organization;regulation of actin filament bundle assembly;…	actin binding;binding;cytoskeletal protein binding;protein binding	actin cytoskeleton;actin filament bundle;actomyosin;cell junction;cell part;cell projection;cell projection part;cell-cell junction;cytoplasm;cytoskeletal part;cytoskeleton;dendritic spine;intracellular non-membrane-bounded organelle;intracellular organelle;intracellular organelle part;intracellular part;membrane;neuron projection;neuron spine;non-membrane-bounded organelle;occluding junction;org…		+	S3_Pel_R3_Pel;S3_Pel_R4_Pel	0.908	2.08592	Q8N3V7	Q8N3V7_S890	SYNPO	SSPGLYTSPGQDSLQPTAVSPPYGGDIsPVSPSR;SSPGLYTsPGQDSLQPTAVSPPYGGDIsPVSPSR;SsPGLYTSPGQDSLQPTAVSPPYGGDIsPVSPSR;sSPGLYTSPGQDSLQPTAVSPPYGGDIsPVSPSR
-0.984533	-0.30403	-0.859605	-0.398983	-1.19964	-0.157518	0.529943	1.15125	1.21596	0.678646	0.999988	1.343	-1.11368	0.600137	-0.959839	-0.858219	-0.968433	-1.18349	0.643018	0.889648	1.10525	0.732141	0.551486	0.68333	-1.25345	-0.938889	-1.04491	-1.25009	-1.26178	-1.26555	0.925447	1.58594	1.31613	0.933655	-0.839332	0.957013			cell part;contractile fiber part;cytoplasmic part;intracellular part;organelle part;Z disc		+	S1_Pel_R1_Pel;S1_Pel_R3_Pel;S1_Pel_R4_Pel;S3_Pel_R1_Pel;S3_Pel_R3_Pel;S3_Pel_R4_Pel;S4_Pel_R1_Pel;S4_Pel_R3_Pel;S4_Pel_R4_Pel	0.908	8.43122	Q8TDC0	Q8TDC0_S112	MYOZ3	SELHIFPAsPGASLGGPEGAHPAAAPAGCVPSPSALAPGYAEPLK;SELHIFPAsPGASLGGPEGAHPAAAPAGCVPsPSALAPGYAEPLK
-0.545578	-0.910639	0.34357	-1.20184	-0.823149	-0.195634	-0.237001	0.0626185	-0.0959269	-0.452373	0.428123	1.37547	0.116748	1.45549	0.038042	-0.482173	0.644955	0.208898	1.00462	0.695692	1.30126	-0.130467	0.159039	0.12418	-2.9363	-0.29433	-0.282365	-1.09752	-0.0987211	-1.38123	1.14872	2.93396	-0.416281	0.197294	-1.00299	0.345823			cell part;contractile fiber part;cytoplasmic part;intracellular part;organelle part;Z disc		+	S3_Pel_R4_Pel;S4_Pel_R4_Pel	0.938	1.72594	Q8TDC0	Q8TDC0_S31	MYOZ3	KLsVPQDLMMEELSLR;LsVPQDLMMEELSLR
0.80992	0.44744	0.341285	0.0336201	0.0746202	0.0332417	0.234914	-0.1913	-0.221154	-1.00465	0.282003	-0.149263	0.367363	-0.126116	0.0627276	-0.23184	0.965032	1.60378	0.39434	-0.670137	0.0747853	-0.209447	0.366853	-0.260983	0.422415	-0.0188628	-3.31295	-0.404181	-3.14701	0.0890965	0.846647	0.259665	0.548724	-0.5234	2.36381	-0.150998	biological regulation;cellular macromolecule metabolic process;cellular metabolic process;cellular process;cellular protein metabolic process;macromolecule metabolic process;macromolecule modification;metabolic process;primary metabolic process;protein metabolic process;protein modification by small protein conjugation;protein modification by small protein conjugation or removal;protein modificat…	acid-amino acid ligase activity;binding;catalytic activity;cation binding;ion binding;ligase activity;ligase activity, forming carbon-nitrogen bonds;metal ion binding;small conjugating protein ligase activity;transition metal ion binding;ubiquitin-protein ligase activity;zinc ion binding	adherens junction;anchoring junction;cell junction;cell part;cell-substrate adherens junction;cell-substrate junction;cytoplasm;focal adhesion;intracellular membrane-bounded organelle;intracellular organelle;intracellular part;macromolecular complex;membrane-bounded organelle;nucleus;organelle;protein complex;ubiquitin ligase complex	Adherens junction	+	S4_Pel_R4_Pel	0.893	1.3236	Q8WWI1	Q8WWI1_S1586	LMO7	TSTTGVATTQsPTPR
-1.03349	-0.389286	0.487123	0.271829	-0.144837	0.275467	0.877117	-0.919628	0.343368	-0.974419	-0.249982	0.563434	0.521533	0.601811	-0.471807	-0.401093	0.879071	-0.00607728	1.13752	-0.683483	-0.163967	-0.41254	1.04128	0.81116	-2.38799	-0.0742172	-2.52991	-1.47119	-1.27582	-0.779471	1.49468	1.34595	0.358654	0.793398	1.61112	0.954695	biological regulation;cellular macromolecule metabolic process;cellular metabolic process;cellular process;cellular protein metabolic process;macromolecule metabolic process;macromolecule modification;metabolic process;primary metabolic process;protein metabolic process;protein modification by small protein conjugation;protein modification by small protein conjugation or removal;protein modificat…	acid-amino acid ligase activity;binding;catalytic activity;cation binding;ion binding;ligase activity;ligase activity, forming carbon-nitrogen bonds;metal ion binding;small conjugating protein ligase activity;transition metal ion binding;ubiquitin-protein ligase activity;zinc ion binding	adherens junction;anchoring junction;cell junction;cell part;cell-substrate adherens junction;cell-substrate junction;cytoplasm;focal adhesion;intracellular membrane-bounded organelle;intracellular organelle;intracellular part;macromolecular complex;membrane-bounded organelle;nucleus;organelle;protein complex;ubiquitin ligase complex	Adherens junction	+	R1_Pel_R4_Pel;R3_Pel_R4_Pel;S1_Pel_R4_Pel;S3_Pel_R4_Pel;S4_Pel_R4_Pel	0.936	4.17843	Q8WWI1	Q8WWI1_S540	LMO7	KFsEQDDSVER
-0.205021	-0.217987	-0.153548	-0.738034	-1.52911	-1.70779	0.872911	1.1014	-1.17762	-0.344852	0.291897	-0.104557	-1.1474	0.0898537	-0.661824	0.840122	-0.274574	0.812602	0.544044	0.430243	0.669746	0.56466	0.173103	-0.0993209	-0.0680702	-0.435926	-0.125482	-0.881221	-2.40641	-1.2774	1.55007	1.58835	0.899549	0.117182	2.58428	0.426137	biological regulation;cellular macromolecule metabolic process;cellular metabolic process;cellular process;cellular protein metabolic process;macromolecule metabolic process;macromolecule modification;metabolic process;primary metabolic process;protein metabolic process;protein modification by small protein conjugation;protein modification by small protein conjugation or removal;protein modificat…	acid-amino acid ligase activity;binding;catalytic activity;cation binding;ion binding;ligase activity;ligase activity, forming carbon-nitrogen bonds;metal ion binding;small conjugating protein ligase activity;transition metal ion binding;ubiquitin-protein ligase activity;zinc ion binding	adherens junction;anchoring junction;cell junction;cell part;cell-substrate adherens junction;cell-substrate junction;cytoplasm;focal adhesion;intracellular membrane-bounded organelle;intracellular organelle;intracellular part;macromolecular complex;membrane-bounded organelle;nucleus;organelle;protein complex;ubiquitin ligase complex	Adherens junction	+	S4_Pel_R1_Pel;S4_Pel_R4_Pel	0.928	3.22201	Q8WWI1	Q8WWI1_S867	LMO7	VTTEIQLPSQsPVEEQSPASLSSLR
-0.318032	0.028382	-0.226752	-0.786713	-0.189848	-0.0347131	0.636023	1.39808	-0.510945	1.08646	1.37001	1.42073	-1.01849	-0.587415	-1.39313	-0.575579	-1.42817	0.791805	0.54061	0.676996	1.44775	1.03271	-1.68035	0.777619	-1.37802	-1.42322	-0.647057	-0.288734	-0.489636	-1.68932	-0.271007	1.47517	0.97363	1.00385	0.869501	-0.592209	cellular component organization;cellular component organization at cellular level;cellular component organization or biogenesis;cellular component organization or biogenesis at cellular level;cellular process;cytoskeleton organization;organelle organization	actinin binding;alpha-actinin binding;binding;cytoskeletal protein binding;muscle alpha-actinin binding;protein binding	actin cytoskeleton;actin filament;adherens junction;anchoring junction;cell junction;cell part;cell projection;cell-substrate adherens junction;cell-substrate junction;contractile fiber part;cytoplasm;cytoplasmic part;cytoskeletal part;cytoskeleton;focal adhesion;intracellular membrane-bounded organelle;intracellular non-membrane-bounded organelle;intracellular organelle;intracellular organelle p…		+	S1_Pel_R3_Pel;S1_Pel_R4_Pel;S3_Pel_R4_Pel;S4_Pel_R4_Pel	0.927	3.17862	Q8WX93	Q8WX93_S641	PALLD	SLPTPAVLLsPTKEPPPLLAK
-1.94055	-0.0162082	-0.289463	-0.636829	-0.43452	-0.340002	0.392801	0.909525	0.773155	1.02301	1.83725	1.1367	-0.369163	0.599715	-0.16643	0.290851	-0.112119	0.0921782	-0.246279	-0.0477534	0.0598571	0.968319	0.397503	0.418833	-2.63509	-0.476008	-0.158203	-0.16923	-3.45105	-0.435747	0.411499	0.717866	0.238015	0.915242	0.340217	0.402093	cellular component organization;cellular component organization at cellular level;cellular component organization or biogenesis;cellular component organization or biogenesis at cellular level;cellular process;cytoskeleton organization;organelle organization	actinin binding;alpha-actinin binding;binding;cytoskeletal protein binding;muscle alpha-actinin binding;protein binding	actin cytoskeleton;actin filament;adherens junction;anchoring junction;cell junction;cell part;cell projection;cell-substrate adherens junction;cell-substrate junction;contractile fiber part;cytoplasm;cytoplasmic part;cytoskeletal part;cytoskeleton;focal adhesion;intracellular membrane-bounded organelle;intracellular non-membrane-bounded organelle;intracellular organelle;intracellular organelle p…		+	R3_Pel_R4_Pel;S1_Pel_R1_Pel;S1_Pel_R4_Pel;S3_Pel_R4_Pel;S4_Pel_R4_Pel	0.941	3.871	Q8WX93	Q8WX93_S893	PALLD	IAsDEEIQGTK
-0.498501	-0.490206	-0.246114	1.53162	1.65971	1.7822	-1.01603	-0.646324	-0.538828	-0.307822	-0.764561	-0.581034	-0.65305	1.26009	1.28157	1.61325	1.79293	1.56161	-0.409374	-1.15868	-0.348347	-0.407057	-0.401519	-0.714079	-0.495254	1.57182	-0.565102	-1.02958	-0.764736	-0.463275	-0.382731	-1.08688	-0.240902	-0.666658	1.40417	-0.582339	actin cytoskeleton organization;actin filament organization;actin filament-based movement;actin filament-based process;actin-mediated cell contraction;actin-myosin filament sliding;actomyosin structure organization;anatomical structure development;anatomical structure formation involved in morphogenesis;anatomical structure morphogenesis;biological regulation;blood coagulation;cardiac muscle cont…	actin binding;actin filament binding;actinin binding;adenyl nucleotide binding;adenyl ribonucleotide binding;alpha-actinin binding;ATP binding;binding;calcium ion binding;calmodulin binding;catalytic activity;cation binding;cytoskeletal protein binding;enzyme binding;identical protein binding;ion binding;kinase activity;kinase binding;metal ion binding;muscle alpha-actinin binding;nucleotide bind…	cell part;chromosome;condensed chromosome;condensed nuclear chromosome;contractile fiber part;cytoplasmic part;cytoskeletal part;cytosol;extracellular membrane-bounded organelle;extracellular organelle;extracellular region;extracellular region part;extracellular vesicular exosome;I band;intracellular non-membrane-bounded organelle;intracellular organelle;intracellular organelle part;intracellular…	Dilated cardiomyopathy;Hypertrophic cardiomyopathy (HCM)	+	R3_Pel_R4_Pel;R3_Pel_S1_Pel;R3_Pel_S3_Pel	1	2.60554	Q8WZ42	Q8WZ42_S1413	TTN	sPIRMsPAR
-0.319565	-0.391059	-0.462081	1.53377	1.6671	1.7946	-0.754821	-0.483854	-0.490051	-0.755977	-0.100332	-0.886527	-0.506816	1.25113	1.27348	1.61874	1.80577	1.56499	-0.830334	-0.496845	-0.387417	-0.520154	-0.906257	-0.538951	-0.248497	1.57562	-1.15534	-1.02483	-0.674239	-0.774895	-0.604286	-0.530405	-0.41357	-0.660007	1.4011	-0.569188	actin cytoskeleton organization;actin filament organization;actin filament-based movement;actin filament-based process;actin-mediated cell contraction;actin-myosin filament sliding;actomyosin structure organization;anatomical structure development;anatomical structure formation involved in morphogenesis;anatomical structure morphogenesis;biological regulation;blood coagulation;cardiac muscle cont…	actin binding;actin filament binding;actinin binding;adenyl nucleotide binding;adenyl ribonucleotide binding;alpha-actinin binding;ATP binding;binding;calcium ion binding;calmodulin binding;catalytic activity;cation binding;cytoskeletal protein binding;enzyme binding;identical protein binding;ion binding;kinase activity;kinase binding;metal ion binding;muscle alpha-actinin binding;nucleotide bind…	cell part;chromosome;condensed chromosome;condensed nuclear chromosome;contractile fiber part;cytoplasmic part;cytoskeletal part;cytosol;extracellular membrane-bounded organelle;extracellular organelle;extracellular region;extracellular region part;extracellular vesicular exosome;I band;intracellular non-membrane-bounded organelle;intracellular organelle;intracellular organelle part;intracellular…	Dilated cardiomyopathy;Hypertrophic cardiomyopathy (HCM)	+	R3_Pel_R4_Pel;R3_Pel_S1_Pel;R3_Pel_S3_Pel;R3_Pel_S4_Pel	1	2.7757	Q8WZ42	Q8WZ42_S1418	TTN	sPIRMsPAR
-0.081852	-0.691926	-0.940357	-1.02345	0.220183	0.307701	0.0622654	0.379834	-0.0465961	0.103545	1.37344	0.648869	-0.992062	0.0650712	-0.76144	-0.321395	1.00155	0.668958	-0.0648745	0.500225	-0.760846	0.0943983	0.808695	-0.203828	-0.957929	-0.421147	-0.692699	-1.14628	-2.07837	-0.662071	1.25339	0.432017	-0.558173	0.194161	3.92755	0.363433	actin cytoskeleton organization;actin filament organization;actin filament-based movement;actin filament-based process;actin-mediated cell contraction;actin-myosin filament sliding;actomyosin structure organization;anatomical structure development;anatomical structure formation involved in morphogenesis;anatomical structure morphogenesis;biological regulation;blood coagulation;cardiac muscle cont…	actin binding;actin filament binding;actinin binding;adenyl nucleotide binding;adenyl ribonucleotide binding;alpha-actinin binding;ATP binding;binding;calcium ion binding;calmodulin binding;catalytic activity;cation binding;cytoskeletal protein binding;enzyme binding;identical protein binding;ion binding;kinase activity;kinase binding;metal ion binding;muscle alpha-actinin binding;nucleotide bind…	cell part;chromosome;condensed chromosome;condensed nuclear chromosome;contractile fiber part;cytoplasmic part;cytoskeletal part;cytosol;extracellular membrane-bounded organelle;extracellular organelle;extracellular region;extracellular region part;extracellular vesicular exosome;I band;intracellular non-membrane-bounded organelle;intracellular organelle;intracellular organelle part;intracellular…	Dilated cardiomyopathy;Hypertrophic cardiomyopathy (HCM)	+	S4_Pel_R4_Pel	0.944	1.93167	Q8WZ42	Q8WZ42_S1799	TTN	DEKsLVEESQLPEGR;YGTDHTSATLIVKDEKsLVEESQLPEGR;sLVEESQLPEGR
-2.60241	-1.31363	-0.420246	-1.08684	-0.442827	-0.144268	0.684065	0.421658	0.837011	0.102306	1.32858	0.823728	-0.320029	-0.844399	-1.28336	-0.266471	0.0484775	1.555	0.495352	0.252353	0.702149	0.52506	0.68994	-1.0215	-0.708996	-1.44632	-0.0647451	-1.01934	-0.669143	-0.931506	0.611392	1.49062	1.12496	0.171968	2.07783	0.643581	actin cytoskeleton organization;actin filament organization;actin filament-based movement;actin filament-based process;actin-mediated cell contraction;actin-myosin filament sliding;actomyosin structure organization;anatomical structure development;anatomical structure formation involved in morphogenesis;anatomical structure morphogenesis;biological regulation;blood coagulation;cardiac muscle cont…	actin binding;actin filament binding;actinin binding;adenyl nucleotide binding;adenyl ribonucleotide binding;alpha-actinin binding;ATP binding;binding;calcium ion binding;calmodulin binding;catalytic activity;cation binding;cytoskeletal protein binding;enzyme binding;identical protein binding;ion binding;kinase activity;kinase binding;metal ion binding;muscle alpha-actinin binding;nucleotide bind…	cell part;chromosome;condensed chromosome;condensed nuclear chromosome;contractile fiber part;cytoplasmic part;cytoskeletal part;cytosol;extracellular membrane-bounded organelle;extracellular organelle;extracellular region;extracellular region part;extracellular vesicular exosome;I band;intracellular non-membrane-bounded organelle;intracellular organelle;intracellular organelle part;intracellular…	Dilated cardiomyopathy;Hypertrophic cardiomyopathy (HCM)	+	S1_Pel_R1_Pel;S1_Pel_R4_Pel;S3_Pel_R1_Pel;S4_Pel_R1_Pel;S4_Pel_R4_Pel	0.927	4.06516	Q8WZ42	Q8WZ42_S214	TTN	TIVSTAQIsESR
-0.830112	1.22867	-1.22986	-1.36814	1.45025	-0.944345	-1.0351	-0.568567	-0.649165	-0.652044	1.39345	-0.150533	-0.942336	-0.455063	-0.895322	-0.541658	-1.09042	-0.543001	1.10249	1.25716	-0.455199	1.28335	1.37791	1.19594	0.0642134	-0.283292	0.00490644	-0.383278	-1.29339	-0.770487	1.13038	-0.7792	1.25568	1.58239	0.0872621	1.44647	actin cytoskeleton organization;actin filament organization;actin filament-based movement;actin filament-based process;actin-mediated cell contraction;actin-myosin filament sliding;actomyosin structure organization;anatomical structure development;anatomical structure formation involved in morphogenesis;anatomical structure morphogenesis;biological regulation;blood coagulation;cardiac muscle cont…	actin binding;actin filament binding;actinin binding;adenyl nucleotide binding;adenyl ribonucleotide binding;alpha-actinin binding;ATP binding;binding;calcium ion binding;calmodulin binding;catalytic activity;cation binding;cytoskeletal protein binding;enzyme binding;identical protein binding;ion binding;kinase activity;kinase binding;metal ion binding;muscle alpha-actinin binding;nucleotide bind…	cell part;chromosome;condensed chromosome;condensed nuclear chromosome;contractile fiber part;cytoplasmic part;cytoskeletal part;cytosol;extracellular membrane-bounded organelle;extracellular organelle;extracellular region;extracellular region part;extracellular vesicular exosome;I band;intracellular non-membrane-bounded organelle;intracellular organelle;intracellular organelle part;intracellular…	Dilated cardiomyopathy;Hypertrophic cardiomyopathy (HCM)	+	S3_Pel_R3_Pel;S4_Pel_R3_Pel	0.935	2.3653	Q8WZ42	Q8WZ42_S26458	TTN	ETTsTTWHIVSQAVAR
0.726009	-0.573324	1.48588	0.659579	0.50511	0.602173	-1.09803	-1.45551	-1.89675	-1.07125	0.0863389	-0.294485	0.361233	-0.167468	0.540512	0.936005	1.53121	0.484916	0.0203726	-1.35602	-1.00912	-0.0622308	-0.304405	-0.859143	-0.205664	0.455247	0.372345	1.05829	-3.23719	1.45289	0.117027	0.530246	0.300625	0.359063	0.463052	0.54246	actin cytoskeleton organization;actin filament organization;actin filament-based movement;actin filament-based process;actin-mediated cell contraction;actin-myosin filament sliding;actomyosin structure organization;anatomical structure development;anatomical structure formation involved in morphogenesis;anatomical structure morphogenesis;biological regulation;blood coagulation;cardiac muscle cont…	actin binding;actin filament binding;actinin binding;adenyl nucleotide binding;adenyl ribonucleotide binding;alpha-actinin binding;ATP binding;binding;calcium ion binding;calmodulin binding;catalytic activity;cation binding;cytoskeletal protein binding;enzyme binding;identical protein binding;ion binding;kinase activity;kinase binding;metal ion binding;muscle alpha-actinin binding;nucleotide bind…	cell part;chromosome;condensed chromosome;condensed nuclear chromosome;contractile fiber part;cytoplasmic part;cytoskeletal part;cytosol;extracellular membrane-bounded organelle;extracellular organelle;extracellular region;extracellular region part;extracellular vesicular exosome;I band;intracellular non-membrane-bounded organelle;intracellular organelle;intracellular organelle part;intracellular…	Dilated cardiomyopathy;Hypertrophic cardiomyopathy (HCM)	+	R1_Pel_S1_Pel;R3_Pel_S1_Pel	0.95	1.83193	Q8WZ42	Q8WZ42_S265	TTN	SRsPTPPSIAAK;SRsPtPPSIAAK;sPTPPSIAAK;sRsPTPPSIAAK;sRsPTPPsIAAK;sRsPtPPSIAAK
-0.49857	-0.592056	0.0111381	-0.206831	-0.0354819	-1.30856	-0.312888	0.541071	-0.167257	-0.0709015	1.16328	0.42325	-0.605704	-0.277145	-0.544807	0.0199768	0.509693	0.169399	0.555852	-0.383089	-0.182517	0.111338	0.412213	-0.801871	-0.706511	-0.449334	-0.636137	-0.351569	-3.52527	-0.865936	0.758863	1.56935	1.58884	0.734209	1.87981	2.07414	actin cytoskeleton organization;actin filament organization;actin filament-based movement;actin filament-based process;actin-mediated cell contraction;actin-myosin filament sliding;actomyosin structure organization;anatomical structure development;anatomical structure formation involved in morphogenesis;anatomical structure morphogenesis;biological regulation;blood coagulation;cardiac muscle cont…	actin binding;actin filament binding;actinin binding;adenyl nucleotide binding;adenyl ribonucleotide binding;alpha-actinin binding;ATP binding;binding;calcium ion binding;calmodulin binding;catalytic activity;cation binding;cytoskeletal protein binding;enzyme binding;identical protein binding;ion binding;kinase activity;kinase binding;metal ion binding;muscle alpha-actinin binding;nucleotide bind…	cell part;chromosome;condensed chromosome;condensed nuclear chromosome;contractile fiber part;cytoplasmic part;cytoskeletal part;cytosol;extracellular membrane-bounded organelle;extracellular organelle;extracellular region;extracellular region part;extracellular vesicular exosome;I band;intracellular non-membrane-bounded organelle;intracellular organelle;intracellular organelle part;intracellular…	Dilated cardiomyopathy;Hypertrophic cardiomyopathy (HCM)	+	S1_Pel_R4_Pel;S4_Pel_R1_Pel;S4_Pel_R3_Pel;S4_Pel_R4_Pel;S4_Pel_S3_Pel	0.922	4.63903	Q8WZ42	Q8WZ42_S33624	TTN	AVsPTETKPTPTEK;AVsPTETKPTPtEK;AVsPTETKPtPTEK;AVsPtETKPTPTEK
-2.6712	-1.86886	0.0804386	-0.544055	-0.12161	-0.128498	0.698431	0.926524	0.656436	0.608976	0.71494	1.19937	-0.08579	-0.121019	-1.63144	-0.471805	-0.126042	-0.21165	0.766516	0.8619	0.786068	0.651204	0.520186	0.574516	-0.00171318	-0.323054	-1.85969	-0.651008	-2.29709	-0.228651	0.832124	0.996	1.23706	0.65426	-0.372409	0.950635	actin cytoskeleton organization;actin filament organization;actin filament-based movement;actin filament-based process;actin-mediated cell contraction;actin-myosin filament sliding;actomyosin structure organization;anatomical structure development;anatomical structure formation involved in morphogenesis;anatomical structure morphogenesis;biological regulation;blood coagulation;cardiac muscle cont…	actin binding;actin filament binding;actinin binding;adenyl nucleotide binding;adenyl ribonucleotide binding;alpha-actinin binding;ATP binding;binding;calcium ion binding;calmodulin binding;catalytic activity;cation binding;cytoskeletal protein binding;enzyme binding;identical protein binding;ion binding;kinase activity;kinase binding;metal ion binding;muscle alpha-actinin binding;nucleotide bind…	cell part;chromosome;condensed chromosome;condensed nuclear chromosome;contractile fiber part;cytoplasmic part;cytoskeletal part;cytosol;extracellular membrane-bounded organelle;extracellular organelle;extracellular region;extracellular region part;extracellular vesicular exosome;I band;intracellular non-membrane-bounded organelle;intracellular organelle;intracellular organelle part;intracellular…	Dilated cardiomyopathy;Hypertrophic cardiomyopathy (HCM)	+	S1_Pel_R1_Pel;S1_Pel_R3_Pel;S1_Pel_R4_Pel;S3_Pel_R1_Pel;S3_Pel_R4_Pel;S4_Pel_R1_Pel;S4_Pel_R4_Pel	0.94	4.31352	Q8WZ42	Q8WZ42_S33976	TTN	AFSTQMsINEGQR
-0.441332	-1.04617	-0.150126	-0.660395	-0.974482	-1.59778	-0.0191845	1.22879	1.58894	-0.981019	0.588835	1.19771	-0.405843	-0.441457	-0.447259	-0.559076	-0.263259	-0.237018	0.23197	0.777898	0.962359	-0.100265	0.223039	-0.6596	-0.236986	-0.406471	-0.631174	-0.964923	-1.64556	-0.250063	0.79731	2.31631	2.98016	-0.295738	-0.221779	0.743641	actin cytoskeleton organization;actin filament organization;actin filament-based movement;actin filament-based process;actin-mediated cell contraction;actin-myosin filament sliding;actomyosin structure organization;anatomical structure development;anatomical structure formation involved in morphogenesis;anatomical structure morphogenesis;biological regulation;blood coagulation;cardiac muscle cont…	actin binding;actin filament binding;actinin binding;adenyl nucleotide binding;adenyl ribonucleotide binding;alpha-actinin binding;ATP binding;binding;calcium ion binding;calmodulin binding;catalytic activity;cation binding;cytoskeletal protein binding;enzyme binding;identical protein binding;ion binding;kinase activity;kinase binding;metal ion binding;muscle alpha-actinin binding;nucleotide bind…	cell part;chromosome;condensed chromosome;condensed nuclear chromosome;contractile fiber part;cytoplasmic part;cytoskeletal part;cytosol;extracellular membrane-bounded organelle;extracellular organelle;extracellular region;extracellular region part;extracellular vesicular exosome;I band;intracellular non-membrane-bounded organelle;intracellular organelle;intracellular organelle part;intracellular…	Dilated cardiomyopathy;Hypertrophic cardiomyopathy (HCM)	+	S1_Pel_R1_Pel;S4_Pel_R1_Pel;S4_Pel_R3_Pel;S4_Pel_R4_Pel	1	3.03219	Q8WZ42	Q8WZ42_T10148	TTN	tPVQEEVIEVK
1.10765	-0.367515	0.785834	-0.309986	-0.5032	0.145713	-0.809559	-1.33958	-0.473969	0.434103	-1.12868	0.720822	0.153789	0.044624	0.105682	2.17227	0.995017	1.56178	-0.206792	-0.356257	-2.2153	-0.668816	-0.448618	-1.22204	-1.69592	0.742405	0.215042	0.0714505	-1.36668	-0.345986	-0.175473	1.29236	-0.471854	0.391054	1.45476	1.71186	actin cytoskeleton organization;actin filament organization;actin filament-based movement;actin filament-based process;actin-mediated cell contraction;actin-myosin filament sliding;actomyosin structure organization;anatomical structure development;anatomical structure formation involved in morphogenesis;anatomical structure morphogenesis;biological regulation;blood coagulation;cardiac muscle cont…	actin binding;actin filament binding;actinin binding;adenyl nucleotide binding;adenyl ribonucleotide binding;alpha-actinin binding;ATP binding;binding;calcium ion binding;calmodulin binding;catalytic activity;cation binding;cytoskeletal protein binding;enzyme binding;identical protein binding;ion binding;kinase activity;kinase binding;metal ion binding;muscle alpha-actinin binding;nucleotide bind…	cell part;chromosome;condensed chromosome;condensed nuclear chromosome;contractile fiber part;cytoplasmic part;cytoskeletal part;cytosol;extracellular membrane-bounded organelle;extracellular organelle;extracellular region;extracellular region part;extracellular vesicular exosome;I band;intracellular non-membrane-bounded organelle;intracellular organelle;intracellular organelle part;intracellular…	Dilated cardiomyopathy;Hypertrophic cardiomyopathy (HCM)	+	R3_Pel_S3_Pel;S4_Pel_S3_Pel	1	2.09813	Q8WZ42	Q8WZ42_T13931	TTN	IKtADQDLVVDVGKPLTMVVPYDAYPK;LELAAAPKIKtADQDLVVDVGK
0.89662	0.798402	0.859282	-0.979153	-0.685922	1.05392	-1.01023	-1.97668	-1.23963	-0.174685	-0.417589	-1.1069	0.994085	-0.378091	0.739415	0.776506	0.231422	1.59462	0.749071	-0.32537	0.546587	-0.0399498	-1.44759	-2.46765	0.495067	0.41083	-0.0932823	-0.387421	-1.10036	-0.441679	0.236755	0.350503	1.3306	-0.43674	1.93047	0.714776	actin cytoskeleton organization;actin filament organization;actin filament-based movement;actin filament-based process;actin-mediated cell contraction;actin-myosin filament sliding;actomyosin structure organization;anatomical structure development;anatomical structure formation involved in morphogenesis;anatomical structure morphogenesis;biological regulation;blood coagulation;cardiac muscle cont…	actin binding;actin filament binding;actinin binding;adenyl nucleotide binding;adenyl ribonucleotide binding;alpha-actinin binding;ATP binding;binding;calcium ion binding;calmodulin binding;catalytic activity;cation binding;cytoskeletal protein binding;enzyme binding;identical protein binding;ion binding;kinase activity;kinase binding;metal ion binding;muscle alpha-actinin binding;nucleotide bind…	cell part;chromosome;condensed chromosome;condensed nuclear chromosome;contractile fiber part;cytoplasmic part;cytoskeletal part;cytosol;extracellular membrane-bounded organelle;extracellular organelle;extracellular region;extracellular region part;extracellular vesicular exosome;I band;intracellular non-membrane-bounded organelle;intracellular organelle;intracellular organelle part;intracellular…	Dilated cardiomyopathy;Hypertrophic cardiomyopathy (HCM)	+	R3_Pel_S1_Pel;S4_Pel_S1_Pel	0.941	2.07198	Q8WZ42	Q8WZ42_T21322	TTN	AGDtIVLNAISILGKPLPK
-0.626599	-0.83558	-0.772632	-0.521764	-0.639398	-0.197072	-0.338747	1.46084	1.47973	0.624726	1.51895	1.29163	-0.549099	-0.544171	-0.683166	-0.605978	-0.781393	-0.428172	-1.16734	0.897157	1.13125	-0.917368	-0.734197	-0.936503	-0.73063	-0.231616	-0.76667	-0.854953	-0.875701	-1.06759	1.14629	1.77468	2.06044	-0.101563	0.991889	1.53031	actin cytoskeleton organization;actin filament organization;actin filament-based movement;actin filament-based process;actin-mediated cell contraction;actin-myosin filament sliding;actomyosin structure organization;anatomical structure development;anatomical structure formation involved in morphogenesis;anatomical structure morphogenesis;biological regulation;blood coagulation;cardiac muscle cont…	actin binding;actin filament binding;actinin binding;adenyl nucleotide binding;adenyl ribonucleotide binding;alpha-actinin binding;ATP binding;binding;calcium ion binding;calmodulin binding;catalytic activity;cation binding;cytoskeletal protein binding;enzyme binding;identical protein binding;ion binding;kinase activity;kinase binding;metal ion binding;muscle alpha-actinin binding;nucleotide bind…	cell part;chromosome;condensed chromosome;condensed nuclear chromosome;contractile fiber part;cytoplasmic part;cytoskeletal part;cytosol;extracellular membrane-bounded organelle;extracellular organelle;extracellular region;extracellular region part;extracellular vesicular exosome;I band;intracellular non-membrane-bounded organelle;intracellular organelle;intracellular organelle part;intracellular…	Dilated cardiomyopathy;Hypertrophic cardiomyopathy (HCM)	+	S1_Pel_R1_Pel;S1_Pel_R3_Pel;S1_Pel_R4_Pel;S1_Pel_S3_Pel;S4_Pel_R1_Pel;S4_Pel_R3_Pel;S4_Pel_R4_Pel;S4_Pel_S3_Pel	0.9	5.7553	Q8WZ42	Q8WZ42_T33626	TTN	AVsPtETKPTPTEK
-0.316711	-0.827654	-0.658098	-1.06007	-0.680413	-0.713903	0.753155	1.52319	1.54524	-0.881108	1.58808	1.33985	-0.54537	0.282944	-0.852106	-0.289857	-0.640526	-0.74369	-0.684865	0.927707	1.16672	-0.663298	-0.585769	-0.587098	-1.0117	-1.01188	-0.937414	-0.344926	-0.271181	-0.767783	-0.478399	1.83765	2.16908	0.874897	-0.0545679	1.59987	actin cytoskeleton organization;actin filament organization;actin filament-based movement;actin filament-based process;actin-mediated cell contraction;actin-myosin filament sliding;actomyosin structure organization;anatomical structure development;anatomical structure formation involved in morphogenesis;anatomical structure morphogenesis;biological regulation;blood coagulation;cardiac muscle cont…	actin binding;actin filament binding;actinin binding;adenyl nucleotide binding;adenyl ribonucleotide binding;alpha-actinin binding;ATP binding;binding;calcium ion binding;calmodulin binding;catalytic activity;cation binding;cytoskeletal protein binding;enzyme binding;identical protein binding;ion binding;kinase activity;kinase binding;metal ion binding;muscle alpha-actinin binding;nucleotide bind…	cell part;chromosome;condensed chromosome;condensed nuclear chromosome;contractile fiber part;cytoplasmic part;cytoskeletal part;cytosol;extracellular membrane-bounded organelle;extracellular organelle;extracellular region;extracellular region part;extracellular vesicular exosome;I band;intracellular non-membrane-bounded organelle;intracellular organelle;intracellular organelle part;intracellular…	Dilated cardiomyopathy;Hypertrophic cardiomyopathy (HCM)	+	S1_Pel_R1_Pel;S1_Pel_R3_Pel;S1_Pel_R4_Pel;S4_Pel_R1_Pel;S4_Pel_R3_Pel;S4_Pel_R4_Pel	0.939	3.82013	Q8WZ42	Q8WZ42_T33631	TTN	AVsPTETKPtPTEK
-0.542001	-0.797592	-1.1665	-1.18635	-0.923005	0.178079	0.765012	1.22347	1.09699	-1.69614	1.01437	1.36211	-1.13169	-0.704187	-1.11757	-0.632413	-0.44692	-1.23342	0.808724	1.09437	1.07494	0.982962	1.25247	0.702253	-0.694107	-0.609258	-0.167586	-1.15691	-0.867903	-0.761421	-0.4967	1.65881	1.19344	0.648363	-0.0627294	1.33802	actin cytoskeleton organization;actin filament organization;actin filament-based movement;actin filament-based process;actin-mediated cell contraction;actin-myosin filament sliding;actomyosin structure organization;anatomical structure development;anatomical structure formation involved in morphogenesis;anatomical structure morphogenesis;biological regulation;blood coagulation;cardiac muscle cont…	actin binding;actin filament binding;actinin binding;adenyl nucleotide binding;adenyl ribonucleotide binding;alpha-actinin binding;ATP binding;binding;calcium ion binding;calmodulin binding;catalytic activity;cation binding;cytoskeletal protein binding;enzyme binding;identical protein binding;ion binding;kinase activity;kinase binding;metal ion binding;muscle alpha-actinin binding;nucleotide bind…	cell part;chromosome;condensed chromosome;condensed nuclear chromosome;contractile fiber part;cytoplasmic part;cytoskeletal part;cytosol;extracellular membrane-bounded organelle;extracellular organelle;extracellular region;extracellular region part;extracellular vesicular exosome;I band;intracellular non-membrane-bounded organelle;intracellular organelle;intracellular organelle part;intracellular…	Dilated cardiomyopathy;Hypertrophic cardiomyopathy (HCM)	+	S1_Pel_R1_Pel;S1_Pel_R3_Pel;S1_Pel_R4_Pel;S3_Pel_R1_Pel;S3_Pel_R3_Pel;S3_Pel_R4_Pel;S4_Pel_R1_Pel;S4_Pel_R3_Pel;S4_Pel_R4_Pel	0.928	5.12047	Q8WZ42	Q8WZ42_T886	TTN	AEPTPLPQFPFADtPDTYK;AEPTPLPQFPFADtPDTYKSEAGVEVK
-0.779183	-0.513255	-0.698632	-0.711399	-1.50649	-0.68663	0.732666	1.08707	1.01047	0.298752	0.574024	0.876899	-0.563062	-0.299265	-1.64643	-0.669669	-0.805577	-0.271972	0.894835	1.34418	1.31167	0.72332	0.578082	0.370894	-0.553733	-1.53647	-0.788398	-0.869217	-2.07279	-0.949332	1.14035	1.7987	1.36485	0.384919	0.566159	0.86367	actin cytoskeleton organization;actin filament organization;actin filament-based movement;actin filament-based process;actin-mediated cell contraction;actin-myosin filament sliding;actomyosin structure organization;anatomical structure development;anatomical structure formation involved in morphogenesis;anatomical structure morphogenesis;biological regulation;blood coagulation;cardiac muscle cont…	actin binding;actin filament binding;actinin binding;adenyl nucleotide binding;adenyl ribonucleotide binding;alpha-actinin binding;ATP binding;binding;calcium ion binding;calmodulin binding;catalytic activity;cation binding;cytoskeletal protein binding;enzyme binding;identical protein binding;ion binding;kinase activity;kinase binding;metal ion binding;muscle alpha-actinin binding;nucleotide bind…	cell part;chromosome;condensed chromosome;condensed nuclear chromosome;contractile fiber part;cytoplasmic part;cytoskeletal part;cytosol;extracellular membrane-bounded organelle;extracellular organelle;extracellular region;extracellular region part;extracellular vesicular exosome;I band;intracellular non-membrane-bounded organelle;intracellular organelle;intracellular organelle part;intracellular…	Dilated cardiomyopathy;Hypertrophic cardiomyopathy (HCM)	+	S1_Pel_R1_Pel;S1_Pel_R3_Pel;S1_Pel_R4_Pel;S3_Pel_R1_Pel;S3_Pel_R3_Pel;S3_Pel_R4_Pel;S4_Pel_R1_Pel;S4_Pel_R3_Pel;S4_Pel_R4_Pel	1	9.84063	Q8WZ42	Q8WZ42_T9898	TTN	AVPPEEIPPVVAPPIPLLLPtPEEK
0.0654917	-0.150875	0.186834	-0.101344	2.46866	1.26742	-1.07989	-1.43055	-0.285629	-0.945461	-0.0811199	-0.30506	0.841997	-0.574431	0.859446	1.36672	1.25003	2.01489	-0.376556	-0.294166	0.93322	-0.0216156	-0.283293	-1.57087	-0.157589	-0.453843	-1.03199	-1.84231	-1.27602	0.359956	-1.09748	1.13538	-0.211188	0.0854655	0.984344	-0.248567	actin cytoskeleton organization;actin filament organization;actin filament-based movement;actin filament-based process;actin-mediated cell contraction;actin-myosin filament sliding;actomyosin structure organization;anatomical structure development;anatomical structure formation involved in morphogenesis;anatomical structure morphogenesis;biological regulation;blood coagulation;cardiac muscle cont…	actin binding;actin filament binding;actinin binding;adenyl nucleotide binding;adenyl ribonucleotide binding;alpha-actinin binding;ATP binding;binding;calcium ion binding;calmodulin binding;catalytic activity;cation binding;cytoskeletal protein binding;enzyme binding;identical protein binding;ion binding;kinase activity;kinase binding;metal ion binding;muscle alpha-actinin binding;nucleotide bind…	cell part;chromosome;condensed chromosome;condensed nuclear chromosome;contractile fiber part;cytoplasmic part;cytoskeletal part;cytosol;extracellular membrane-bounded organelle;extracellular organelle;extracellular region;extracellular region part;extracellular vesicular exosome;I band;intracellular non-membrane-bounded organelle;intracellular organelle;intracellular organelle part;intracellular…	Dilated cardiomyopathy;Hypertrophic cardiomyopathy (HCM)	+	R3_Pel_R4_Pel;R3_Pel_S1_Pel	0.886	2.28962	Q8WZ42	Q8WZ42_Y13953	TTN	TADQDLVVDVGKPLTMVVPYDAyPK
0.853965	0.684103	0.247639	-0.24229	0.449303	1.15891	0.820497	-0.233386	0.0638399	-0.287989	-0.169641	0.418128	0.0234013	-1.96308	-0.138622	0.704627	0.617865	1.28976	0.418268	0.14342	0.13678	-0.0369333	0.140542	-0.484723	-0.00885037	-2.18725	-3.15222	-0.160058	-1.982	0.10027	0.257001	0.519006	0.168362	0.102915	2.22091	-0.492474	actin cytoskeleton organization;actin filament-based process;actomyosin structure organization;asymmetric Golgi ribbon formation;biological regulation;cell migration;cell motility;cellular component movement;cellular component organization;cellular component organization at cellular level;cellular component organization or biogenesis;cellular component organization or biogenesis at cellular level…	actin binding;actin filament binding;adenyl nucleotide binding;adenyl ribonucleotide binding;ADP binding;ATP binding;binding;catalytic activity;cytoskeletal protein binding;DNA binding;hydrolase activity;hydrolase activity, acting on acid anhydrides;hydrolase activity, acting on acid anhydrides, in phosphorus-containing anhydrides;motor activity;nucleic acid binding;nucleoside-triphosphatase acti…	actomyosin;cell part;cytoplasmic part;cytoskeletal part;endoplasmic reticulum-Golgi intermediate compartment;Golgi apparatus part;Golgi membrane;intracellular membrane-bounded organelle;intracellular organelle;intracellular organelle part;intracellular part;macromolecular complex;membrane;membrane-bounded organelle;myosin complex;organelle;organelle membrane;organelle part;protein complex;trans-G…		+	R1_Pel_R4_Pel;S4_Pel_R4_Pel	1	1.70495	Q92614	Q92614_S1970	MYO18A	LEGDsDVDSELEDR;LEGDsDVDsELEDRVDGVK;NKLEGDsDVDSELEDR;NKLEGDsDVDsELEDR;NKLEGDsDVDsELEDRVDGVK
0.809178	0.568631	0.189682	-0.235683	0.375682	0.997338	0.537289	-0.227952	0.0252757	-0.27536	-0.17744	0.335794	-0.00983389	-1.83391	-0.145677	0.586448	0.511119	1.09034	0.332997	2.09208	0.00517732	-0.0573888	0.105527	-0.446168	-0.0330068	-2.83216	-1.91277	-0.164288	-2.51498	0.0617362	0.30628	0.221114	0.116021	0.0640296	1.98777	-0.452898	actin cytoskeleton organization;actin filament-based process;actomyosin structure organization;asymmetric Golgi ribbon formation;biological regulation;cell migration;cell motility;cellular component movement;cellular component organization;cellular component organization at cellular level;cellular component organization or biogenesis;cellular component organization or biogenesis at cellular level…	actin binding;actin filament binding;adenyl nucleotide binding;adenyl ribonucleotide binding;ADP binding;ATP binding;binding;catalytic activity;cytoskeletal protein binding;DNA binding;hydrolase activity;hydrolase activity, acting on acid anhydrides;hydrolase activity, acting on acid anhydrides, in phosphorus-containing anhydrides;motor activity;nucleic acid binding;nucleoside-triphosphatase acti…	actomyosin;cell part;cytoplasmic part;cytoskeletal part;endoplasmic reticulum-Golgi intermediate compartment;Golgi apparatus part;Golgi membrane;intracellular membrane-bounded organelle;intracellular organelle;intracellular organelle part;intracellular part;macromolecular complex;membrane;membrane-bounded organelle;myosin complex;organelle;organelle membrane;organelle part;protein complex;trans-G…		+	R1_Pel_R4_Pel;S3_Pel_R4_Pel;S4_Pel_R4_Pel	1	1.63511	Q92614	Q92614_S1974	MYO18A	LEGDsDVDsELEDRVDGVK;NKLEGDsDVDsELEDR;NKLEGDsDVDsELEDRVDGVK
0.314299	-0.351153	0.739213	-0.175821	-0.0121013	0.482665	-1.18269	-3.36521	-3.48051	-0.340309	0.348926	0.507055	0.371869	0.919499	-0.0667206	0.740714	0.663211	0.71304	0.0357493	-0.631427	0.469454	-0.125075	0.016734	0.140247	0.550713	0.29854	0.170738	-0.670619	0.692486	-0.386952	0.423352	1.58901	0.76726	0.115321	0.428442	-0.709945	anatomical structure development;developmental process;immune response;immune system process;multicellular organismal process;muscle contraction;muscle system process;muscle tissue development;response to stimulus;skeletal muscle tissue development;striated muscle tissue development;system process;tissue development	binding;calcium ion binding;cation binding;ion binding;metal ion binding;structural constituent of muscle;structural molecule activity	cell part;contractile fiber part;cytoplasmic part;cytoskeletal part;cytosol;intracellular organelle part;intracellular part;lysosomal membrane;macromolecular complex;membrane;muscle myosin complex;myosin complex;myosin II complex;organelle membrane;organelle part;protein complex;vacuolar membrane;vacuolar part	Focal adhesion;Leukocyte transendothelial migration;Regulation of actin cytoskeleton;Tight junction	+	R3_Pel_S1_Pel;S4_Pel_S1_Pel	0.922	1.82144	Q96A32	Q96A32_T10	MYLPF	RRtVEGGSSSVFSMFDQTQIQEFK;RRtVEGGSSsVFSMFDQTQIQEFK;RRtVEGGSsSVFSMFDQTQIQEFK;RRtVEGGsSSVFSMFDQTQIQEFK;RtVEGGSSSVFSMFDQTQIQEFK;RtVEGGSSSVFsMFDQTQIQEFK;tVEGGSSSVFSMFDQTQIQEFK;tVEGGsSSVFSMFDQTQIQEFK
-0.811059	-1.3764	-1.01435	-0.0812526	-0.699435	-0.495572	0.506812	0.768955	1.41298	0.185684	1.26153	0.691001	-0.111777	-1.21962	-1.09201	0.406471	-1.05917	0.456583	0.519522	-2.16473	0.994097	0.426629	0.742966	0.214625	0.0299851	-0.887969	-0.767172	-1.35567	-1.79964	-0.0378414	1.16054	1.20423	2.07525	0.516135	0.623822	0.775846	biological regulation;regulation of anatomical structure morphogenesis;regulation of biological process;regulation of cell development;regulation of cell differentiation;regulation of cell morphogenesis;regulation of cell morphogenesis involved in differentiation;regulation of cell projection organization;regulation of cellular component biogenesis;regulation of cellular component organization;re…	actin binding;actinin binding;binding;cation binding;cytoskeletal protein binding;enzyme binding;ion binding;kinase binding;metal ion binding;protein binding;protein kinase binding;protein kinase C binding;transition metal ion binding;zinc ion binding	actin cytoskeleton;cell junction;cell part;cell projection;contractile fiber part;cytoplasmic part;cytoskeletal part;cytoskeleton;cytosol;intracellular non-membrane-bounded organelle;intracellular organelle;intracellular organelle part;intracellular part;membrane;neuron projection;non-membrane-bounded organelle;organelle;organelle part;postsynaptic density;postsynaptic membrane;synapse part;synap…		+	S1_Pel_R1_Pel;S1_Pel_R4_Pel;S4_Pel_R1_Pel;S4_Pel_R3_Pel;S4_Pel_R4_Pel	0.938	3.79385	Q96HC4	Q96HC4_S111	PDLIM5	EVVKPVPITsPAVSK
1.2146	1.03065	0.807563	0.174214	0.548933	1.09492	-0.086484	0.11318	-0.439097	-1.37278	1.12561	0.60155	0.558611	-1.46715	-1.00135	-1.10911	0.762	1.45139	0.753178	0.114349	0.241155	-0.225818	0.349128	0.518236	-0.864072	-1.2347	-1.51185	-1.36582	-2.02298	-1.0848	0.809094	0.334089	0.169046	-1.39066	1.82552	0.579671	anatomical structure development;developmental process;heart development;organ development	adenyl nucleotide binding;adenyl ribonucleotide binding;ATP binding;binding;catalytic activity;kinase activity;nucleotide binding;phosphotransferase activity, alcohol group as acceptor;protein kinase activity;protein serine/threonine kinase activity;purine nucleotide binding;purine ribonucleoside triphosphate binding;purine ribonucleotide binding;ribonucleotide binding;transferase activity;transf…	cell part;intracellular membrane-bounded organelle;intracellular organelle;intracellular part;membrane-bounded organelle;nucleus;organelle		+	R1_Pel_R4_Pel;S3_Pel_R4_Pel;S4_Pel_R4_Pel	0.931	2.86441	Q96L96	Q96L96_S1390	ALPK3	AAGDGEATTPEEREsPTVSPR;AAGDGEATtPEEREsPTVSPR;AAGDGEAtTPEEREsPTVsPR
-1.13995	-1.322	-1.77691	-2.43817	0.250377	-0.423507	0.902362	1.14069	0.737822	0.199633	0.807854	1.19703	0.246901	0.385057	-1.93286	0.43023	0.319621	-1.40201	0.437956	0.350076	0.819904	0.376261	0.807871	0.539112	0.321168	-1.44221	-1.40148	0.256699	-1.27214	0.247641	0.915234	1.16433	0.9607	0.397838	-0.236306	0.575166	actin cytoskeleton organization;actin filament bundle assembly;actin filament organization;actin filament-based process;biological adhesion;biological regulation;carbohydrate transport;cell adhesion;cell junction assembly;cell junction organization;cell surface receptor linked signaling pathway;cell-matrix adhesion;cell-substrate adhesion;cell-substrate junction assembly;cellular component assemb…	actin binding;binding;binding, bridging;cytoskeletal protein binding;insulin receptor binding;protein binding;protein binding, bridging;protein complex binding;receptor binding;SH3/SH2 adaptor activity;signaling adaptor activity	actin filament bundle;actomyosin;adherens junction;anchoring junction;cell junction;cell part;cell-cell adherens junction;cell-cell junction;cell-substrate adherens junction;cell-substrate junction;centrosome;cytoplasm;cytoplasmic part;cytoskeletal part;cytosol;focal adhesion;intracellular membrane-bounded organelle;intracellular non-membrane-bounded organelle;intracellular organelle;intracellula…	Adherens junction;Insulin signaling pathway;PPAR signaling pathway	+	S1_Pel_R1_Pel;S1_Pel_R4_Pel;S3_Pel_R1_Pel;S4_Pel_R1_Pel	1	3.63345	Q9BX66	Q9BX66_S556	SORBS1	DIsPEEIDLK;DIsPEEIDLKNEPWYK
1.07464	0.473334	1.04959	-0.246346	-0.583942	0.289199	0.175033	-0.896877	-0.851333	0.0993154	-1.70077	-0.380594	0.82096	0.343729	0.0643866	1.51459	0.72508	1.58159	0.257475	-0.452348	-1.14983	-2.12186	-0.40031	-0.705739	0.883545	1.23358	1.04169	-0.831694	-0.152409	0.535374	0.0209976	0.262038	-2.12751	-1.86565	0.854811	1.16625	actin cytoskeleton organization;actin filament bundle assembly;actin filament organization;actin filament-based process;biological adhesion;biological regulation;carbohydrate transport;cell adhesion;cell junction assembly;cell junction organization;cell surface receptor linked signaling pathway;cell-matrix adhesion;cell-substrate adhesion;cell-substrate junction assembly;cellular component assemb…	actin binding;binding;binding, bridging;cytoskeletal protein binding;insulin receptor binding;protein binding;protein binding, bridging;protein complex binding;receptor binding;SH3/SH2 adaptor activity;signaling adaptor activity	actin filament bundle;actomyosin;adherens junction;anchoring junction;cell junction;cell part;cell-cell adherens junction;cell-cell junction;cell-substrate adherens junction;cell-substrate junction;centrosome;cytoplasm;cytoplasmic part;cytoskeletal part;cytosol;focal adhesion;intracellular membrane-bounded organelle;intracellular non-membrane-bounded organelle;intracellular organelle;intracellula…	Adherens junction;Insulin signaling pathway;PPAR signaling pathway	+	R3_Pel_S3_Pel	0.91	1.72386	Q9BX66	Q9BX66_T1004	SORBS1	SLALtPPLPPLPEASIYNTDHLALSPR
-0.580947	-0.93647	-0.88925	-1.15937	-1.44382	-1.15235	0.411402	1.39454	0.967952	0.34157	1.45012	1.21109	-0.769565	-0.163633	-0.880099	-0.964009	-0.853167	-0.462478	-0.442135	0.759471	0.774458	0.560867	0.780642	0.249637	-0.574856	-0.175595	-0.569288	-0.878703	-2.12327	-0.984991	0.8736	1.72694	1.39368	1.04182	1.16356	0.902639	activation of caspase activity;apoptosis;biological regulation;cell death;cellular process;death;positive regulation of caspase activity;positive regulation of catalytic activity;positive regulation of hydrolase activity;positive regulation of molecular function;positive regulation of peptidase activity;programmed cell death;regulation of biological process;regulation of catalytic activity;regula…	apoptotic protease activator activity;caspase activator activity;caspase regulator activity;enzyme activator activity;enzyme regulator activity;peptidase activator activity;peptidase regulator activity	cell part;cytoplasmic part;integral to membrane;intracellular membrane-bounded organelle;intracellular organelle;intracellular organelle part;intracellular part;intrinsic to membrane;membrane;membrane part;membrane-bounded organelle;mitochondrial membrane;mitochondrial part;mitochondrion;nucleus;organelle;organelle membrane;organelle part		+	S1_Pel_R1_Pel;S1_Pel_R3_Pel;S1_Pel_R4_Pel;S3_Pel_R1_Pel;S3_Pel_R3_Pel;S3_Pel_R4_Pel;S4_Pel_R1_Pel;S4_Pel_R3_Pel;S4_Pel_R4_Pel	0.921	9.89196	Q9BXK5	Q9BXK5_S426	BCL2L13	EESLVEELsPASEK
-2.26524	-0.344877	-1.48195	-2.07004	0.454242	-1.86335	-0.801502	0.21404	-0.702789	-0.186348	0.277116	0.144539	0.0944877	0.47202	0.121948	1.05043	0.345165	1.67491	0.773489	-0.133895	0.748707	0.160622	-1.0436	-0.119976	0.95959	0.84158	0.388398	-1.84673	-0.882463	0.418673	1.00987	1.83773	0.234588	0.255484	0.973884	0.291248	biological regulation;cellular process;cellular response to stimulus;cellular response to stress;negative regulation of biological process;negative regulation of cellular metabolic process;negative regulation of cellular process;negative regulation of cellular protein metabolic process;negative regulation of macromolecule metabolic process;negative regulation of metabolic process;negative regulat…		cell part;cytoplasm;extracellular membrane-bounded organelle;extracellular organelle;extracellular region part;extracellular vesicular exosome;intracellular part;membrane;membrane-bounded organelle;membrane-bounded vesicle;organelle;plasma membrane;vesicle		+	R3_Pel_R1_Pel;S4_Pel_R1_Pel	0.913	2.64415	Q9BZQ8	Q9BZQ8_S602	NIBAN1	RAsAILPGVLGSETLSNEVFQESEEEKQPEVPSSLAK
0.361361	1.14675	0.683895	1.03525	1.23021	0.50448	-1.61234	-0.795755	-1.05307	-0.0020312	-1.64184	-0.569753	0.103893	0.637189	0.973146	1.39268	-0.202148	-0.459427	-0.277874	-1.17105	-0.340255	0.0433678	-1.48785	-0.660576	0.0884134	1.44101	1.41358	1.1686	0.135123	0.962579	0.18663	0.0289738	-0.547758	0.810549	-2.63231	-0.893632	anatomical structure morphogenesis;biological regulation;cardiac muscle contraction;cardiac muscle tissue morphogenesis;cell communication;cell differentiation;cell-cell signaling;cellular developmental process;cellular macromolecule metabolic process;cellular metabolic process;cellular process;cellular protein metabolic process;developmental process;macromolecule metabolic process;macromolecule …	adenyl nucleotide binding;adenyl ribonucleotide binding;ATP binding;binding;calmodulin binding;calmodulin-dependent protein kinase activity;catalytic activity;kinase activity;myosin light chain kinase activity;nucleotide binding;phosphotransferase activity, alcohol group as acceptor;protein binding;protein kinase activity;protein serine/threonine kinase activity;purine nucleotide binding;purine r…	cell part;contractile fiber part;cytoplasm;cytoplasmic part;intracellular membrane-bounded organelle;intracellular organelle;intracellular part;membrane-bounded organelle;nucleus;organelle;organelle part;sarcomere	Calcium signaling pathway;Focal adhesion;Gastric acid secretion;Regulation of actin cytoskeleton;Vascular smooth muscle contraction	+	R1_Pel_S1_Pel;R1_Pel_S3_Pel;R1_Pel_S4_Pel;R3_Pel_S1_Pel;R4_Pel_S1_Pel;R4_Pel_S3_Pel;R4_Pel_S4_Pel	0.931	3.79566	Q9H1R3	Q9H1R3_S143	MYLK2	RGsPAFLHSPSCPAIISSSEK
0.495371	-0.335977	-0.594279	-0.336096	0.514829	-0.709341	-0.893548	-0.540963	-0.307631	-0.524155	1.27874	-0.189735	-1.30987	0.119869	-0.250836	0.977137	1.91246	1.21528	-0.695546	-0.888358	-0.097485	0.325188	0.257799	-0.352312	-1.11675	-1.04042	-0.376904	-0.337418	-1.51663	-0.778967	1.36147	0.956999	0.726421	0.0464452	3.44004	-0.434828	cellular process;intermediate filament-based process	structural molecule activity	cell part;contractile fiber part;cytoplasmic part;cytoskeletal part;cytosol;intermediate filament;intracellular organelle part;intracellular part;macromolecular complex;membrane;neuromuscular junction;organelle part;perinuclear region of cytoplasm;plasma membrane;protein complex;sarcolemma;synapse;Z disc		+	S4_Pel_R4_Pel	0.937	1.8015	Q9H7C4	Q9H7C4_S325	SYNC	LsAQFENLMAESR;RLsAQFENLMAESR
0.351676	0.946592	-0.582263	-1.5348	-1.11108	-0.251841	-1.45885	-0.170256	-1.1398	-1.40711	1.14927	0.424309	-0.33264	-0.871206	0.801782	1.49156	1.14975	0.430831	-0.912985	0.895093	1.22228	-0.226272	-0.940809	-1.37738	-0.814606	-0.589434	0.886789	-1.08055	-0.473845	-0.936443	1.34994	1.67375	1.08626	0.85994	0.500951	0.991402	cellular process;intermediate filament-based process	structural molecule activity	cell part;contractile fiber part;cytoplasmic part;cytoskeletal part;cytosol;intermediate filament;intracellular organelle part;intracellular part;macromolecular complex;membrane;neuromuscular junction;organelle part;perinuclear region of cytoplasm;plasma membrane;protein complex;sarcolemma;synapse;Z disc		+	S4_Pel_R4_Pel	0.898	1.63563	Q9H7C4	Q9H7C4_T131	SYNC	IQFVEGPVEPGKPtSPEHVVYEGETVTR
-0.706521	-1.63841	-0.598185	-1.67656	-0.925643	-0.540675	0.620046	-0.201021	0.218669	0.709171	1.12242	0.911995	-0.992376	0.441657	0.143159	0.109038	-0.320889	0.0675857	0.652163	1.16264	1.3155	0.688331	0.796937	0.367165	-1.28086	-0.574754	-0.662726	-1.25649	-2.32737	-1.37358	1.12402	1.66783	0.0550061	1.31957	0.904406	0.678755			cell part;contractile fiber part;cytoplasmic part;cytoskeleton;intracellular membrane-bounded organelle;intracellular non-membrane-bounded organelle;intracellular organelle;intracellular part;membrane-bounded organelle;non-membrane-bounded organelle;nucleus;organelle;organelle part;Z disc		+	R3_Pel_R1_Pel;R3_Pel_R4_Pel;S1_Pel_R1_Pel;S1_Pel_R4_Pel;S3_Pel_R1_Pel;S3_Pel_R3_Pel;S3_Pel_R4_Pel;S4_Pel_R1_Pel;S4_Pel_R3_Pel;S4_Pel_R4_Pel	0.919	8.15223	Q9H987	Q9H987_S108	SYNPO2L	LADEGPVQSPSPHELQVLSPLsPLSPEPPGAPVPQPLQPGSLR;LADEGPVQSPSPHELQVLSPLsPLsPEPPGAPVPQPLQPGSLR;LADEGPVQSPsPHELQVLSPLsPLSPEPPGAPVPQPLQPGSLR;LADEGPVQSPsPHELQVLSPLsPLsPEPPGAPVPQPLQPGSLR;LADEGPVQsPSPHELQVLSPLsPLSPEPPGAPVPQPLQPGSLR
0.879998	-0.513566	0.372347	0.0422829	1.09869	0.283348	-0.370634	-2.10524	-1.67484	-0.932777	0.333465	0.21235	0.309541	-1.05732	-0.654539	0.29348	1.28577	1.42879	0.141217	-1.45605	-0.606381	0.376056	0.27863	0.101211	-0.32597	0.0815888	-1.46044	0.0816561	-2.31045	0.845155	0.87715	0.0412664	0.132675	0.821709	2.36348	0.786341			cell part;contractile fiber part;cytoplasmic part;cytoskeleton;intracellular membrane-bounded organelle;intracellular non-membrane-bounded organelle;intracellular organelle;intracellular part;membrane-bounded organelle;non-membrane-bounded organelle;nucleus;organelle;organelle part;Z disc		+	S4_Pel_S1_Pel	0.937	1.35949	Q9H987	Q9H987_S143	SYNPO2L	SPPDSEAYYGETDsDADGPATQEKPR;SPPDSEAYYGEtDsDADGPATQEKPR;SPPDSEAYyGETDsDADGPATQEKPR;SPPDsEAYYGEtDsDADGPATQEKPR;sPPDSEAYYGEtDsDADGPATQEKPR
0.994178	0.460924	0.534187	1.11677	1.39595	0.999965	-1.21959	-1.50077	-1.08465	0.00505711	-0.971826	-0.29502	-0.999736	-1.55269	-0.603976	1.99537	0.870155	1.25611	-1.24918	-0.920806	-0.854437	0.31636	-0.873544	0.172497	-0.194707	-0.444385	1.17069	1.40978	-1.4189	0.673357	-0.285641	0.491952	-0.660934	0.275365	1.46016	-0.468032			cell part;contractile fiber part;cytoplasmic part;cytoskeleton;intracellular membrane-bounded organelle;intracellular non-membrane-bounded organelle;intracellular organelle;intracellular part;membrane-bounded organelle;non-membrane-bounded organelle;nucleus;organelle;organelle part;Z disc		+	R1_Pel_S1_Pel	0.91	1.60902	Q9H987	Q9H987_S178	SYNPO2L	GPTRPTPPGAPPDEVYLsDSPAEPAPTIPGPPSQGDSR;GPTRPTPPGAPPDEVYLsDSPAEPAPTIPGPPSQGDsR;RGPTRPTPPGAPPDEVYLsDSPAEPAPTIPGPPSQGDSR;RGPTRPTPPGAPPDEVYLsDsPAEPAPTIPGPPSQGDSR
0.469238	-0.170164	0.0763922	-0.339937	0.13093	1.20624	-2.26884	-2.20594	-1.75113	-1.38002	0.0563561	0.0159465	-0.485276	-1.06375	-0.307717	1.96199	0.580197	2.05629	-0.170385	-0.694722	0.0824718	-0.756309	0.00208803	-0.127411	0.196051	0.684819	1.78565	-0.604885	0.630349	0.225062	0.38059	1.2414	0.48501	0.578706	-0.637516	0.118225			cell part;contractile fiber part;cytoplasmic part;cytoskeleton;intracellular membrane-bounded organelle;intracellular non-membrane-bounded organelle;intracellular organelle;intracellular part;membrane-bounded organelle;non-membrane-bounded organelle;nucleus;organelle;organelle part;Z disc		+	R1_Pel_S1_Pel;R3_Pel_S1_Pel;R4_Pel_S1_Pel;S4_Pel_S1_Pel	0.909	2.0892	Q9H987	Q9H987_S345	SYNPO2L	sLTNQSDWDSPYLDMELAR
2.85168	1.45342	-0.345969	0.0718713	-0.0282223	0.251711	-0.921002	-0.554606	-1.37658	-1.18944	-0.0944891	-1.8509	0.165918	0.0908804	0.781997	1.80365	0.575193	0.552822	-0.451936	-0.728266	-0.981691	-0.330162	-0.0166242	-0.625912	1.44275	1.11693	1.34073	0.453022	-0.546785	1.1248	-0.857291	-0.212102	-0.775586	-0.546785	-0.778824	-0.864189			cell part;contractile fiber part;cytoplasmic part;cytoskeleton;intracellular membrane-bounded organelle;intracellular non-membrane-bounded organelle;intracellular organelle;intracellular part;membrane-bounded organelle;non-membrane-bounded organelle;nucleus;organelle;organelle part;Z disc		+	R1_Pel_S1_Pel;R1_Pel_S4_Pel;R3_Pel_S1_Pel;R3_Pel_S4_Pel;R4_Pel_S1_Pel;R4_Pel_S3_Pel;R4_Pel_S4_Pel	0.918	4.17062	Q9H987	Q9H987_S374	SYNPO2L	ASEGQGsGLGGQLSEVSGR
-0.501862	-0.435203	-0.408496	-0.722187	-1.25516	-1.07795	-1.30383	1.33868	0.436039	0.0618976	1.21602	1.02681	-1.14352	-0.195699	-0.0348566	0.443515	0.0753601	0.00144667	-1.43184	1.43033	0.60461	0.103927	-0.142794	-0.602891	-0.501578	-0.225199	0.64786	-0.701124	-2.37004	-0.404972	0.655305	2.82641	1.37501	0.855469	-0.271362	0.631877			cell part;contractile fiber part;cytoplasmic part;cytoskeleton;intracellular membrane-bounded organelle;intracellular non-membrane-bounded organelle;intracellular organelle;intracellular part;membrane-bounded organelle;non-membrane-bounded organelle;nucleus;organelle;organelle part;Z disc		+	S4_Pel_R1_Pel;S4_Pel_R4_Pel	0.932	1.88182	Q9H987	Q9H987_S438	SYNPO2L	AQSAPPEAAVLPPsPLPAPVASPR;AQSAPPEAAVLPPsPLPAPVAsPR;AQSAPPEAAVLPPsPLPAPVAsPRPFQPGGGAPTPAPSIFNR;AQsAPPEAAVLPPsPLPAPVASPR
-1.3688	-0.939031	-1.75312	-0.0342255	0.366044	-1.61324	0.306219	0.638694	0.412555	-1.29419	1.02668	0.972109	0.283023	0.570911	0.309003	0.0724832	0.635947	0.529356	0.714608	-1.63727	0.923934	0.560823	0.65132	0.523984	-0.171497	0.321019	-1.28425	0.129718	-2.58243	-1.71274	0.85828	1.60264	0.470934	0.760694	0.216418	0.533392	actin cytoskeleton organization;actin filament-based process;actomyosin structure organization;anatomical structure formation involved in morphogenesis;cellular component assembly;cellular component assembly at cellular level;cellular component assembly involved in morphogenesis;cellular component organization;cellular component organization at cellular level;cellular component organization or bi…	binding;cytoskeletal protein binding;FATZ binding;protein binding	actin cytoskeleton;cell part;cell projection;cytoskeleton;intracellular membrane-bounded organelle;intracellular non-membrane-bounded organelle;intracellular organelle;intracellular part;membrane-bounded organelle;non-membrane-bounded organelle;nucleus;organelle;pseudopodium		+	S4_Pel_R1_Pel;S4_Pel_R4_Pel	0.78	2.42337	Q9NP98	Q9NP98_S263	MYOZ1	FDLGPLLSEPLVLYNQNLsNRPSFNR
1.49487	0.848087	0.790211	0.397332	0.895452	0.907796	-0.456473	-1.35133	-1.5552	-1.4105	-1.03462	-1.2694	0.260167	-0.0791305	-0.0834915	1.86016	0.786127	1.46921	-0.921649	-1.65106	0.392109	-0.255613	-1.53023	-1.04544	1.28974	0.682227	0.0285208	0.471996	0.663279	0.698286	-0.0657408	0.615784	-0.867513	-0.764573	0.881222	-1.09061	actin cytoskeleton organization;actin filament-based process;actomyosin structure organization;anatomical structure formation involved in morphogenesis;cellular component assembly;cellular component assembly at cellular level;cellular component assembly involved in morphogenesis;cellular component organization;cellular component organization at cellular level;cellular component organization or bi…	binding;cytoskeletal protein binding;FATZ binding;protein binding	actin cytoskeleton;cell part;cell projection;cytoskeleton;intracellular membrane-bounded organelle;intracellular non-membrane-bounded organelle;intracellular organelle;intracellular part;membrane-bounded organelle;non-membrane-bounded organelle;nucleus;organelle;pseudopodium		+	R1_Pel_S1_Pel;R1_Pel_S3_Pel;R3_Pel_S1_Pel;R3_Pel_S3_Pel;R4_Pel_S1_Pel;R4_Pel_S3_Pel	0.901	5.51404	Q9NP98	Q9NP98_S80	MYOZ1	FIYENHPDVFsDSSMDHFQK;FIYENHPDVFsDSsMDHFQK;FIYENHPDVFsDsSMDHFQK
-0.101499	0.452026	-1.72494	0.0167198	0.615894	-0.215776	0.99321	1.17697	0.559736	0.606196	1.35666	1.23786	-2.32876	-0.359106	-1.02245	-1.07358	0.997865	1.08591	-1.0622	-0.133407	-0.829279	0.477483	-1.19726	-1.76986	0.366971	0.720633	-1.0141	-0.548249	-1.14924	0.821878	-0.868191	1.44856	0.718096	0.553395	0.450202	0.741625	actin cytoskeleton organization;actin filament-based process;actomyosin structure organization;anatomical structure formation involved in morphogenesis;cellular component assembly;cellular component assembly at cellular level;cellular component assembly involved in morphogenesis;cellular component organization;cellular component organization at cellular level;cellular component organization or bi…	binding;cytoskeletal protein binding;FATZ binding;protein binding	actin cytoskeleton;cell part;cell projection;cytoskeleton;intracellular membrane-bounded organelle;intracellular non-membrane-bounded organelle;intracellular organelle;intracellular part;membrane-bounded organelle;non-membrane-bounded organelle;nucleus;organelle;pseudopodium		+	S1_Pel_S3_Pel	0.863	1.73142	Q9NP98	Q9NP98_Y107	MYOZ1	FLPTVGGQLGTAGQGFSySK
0.359706	0.465005	0.330555	0.174728	0.258559	0.517644	0.0987987	0.422269	0.357226	-0.174591	0.256506	0.568397	0.205869	0.326717	0.109675	0.199212	0.42549	1.20432	0.29664	-2.6912	0.531794	-0.0133403	0.319871	0.350506	0.55332	-3.15505	-2.33004	0.169945	-2.47294	0.237854	0.622872	0.288335	0.0654572	-0.0909187	1.18274	0.0280661	apoptosis;biological regulation;biosynthetic process;cell death;cellular biosynthetic process;cellular macromolecule biosynthetic process;cellular macromolecule metabolic process;cellular metabolic process;cellular nitrogen compound metabolic process;cellular process;cellular response to stimulus;cellular response to stress;death;macromolecule biosynthetic process;macromolecule metabolic process;…	binding;DNA binding;nucleic acid binding	cell part;cytoplasm;intracellular membrane-bounded organelle;intracellular non-membrane-bounded organelle;intracellular organelle;intracellular organelle part;intracellular part;membrane-bounded organelle;non-membrane-bounded organelle;nuclear part;nucleolus;nucleoplasm;nucleus;organelle;organelle part		+	R3_Pel_R4_Pel	1	1.49732	Q9NYF8	Q9NYF8_S177	BCLAF1	AEGEPQEEsPLK;KAEGEPQEEsPLK
0.454619	0.337107	1.12596	1.0057	1.194	2.264	-2.23946	-1.50272	-1.99923	0.095435	0.612881	-0.128598	-0.939858	-0.597436	-0.27452	0.218017	1.40312	0.522767	0.723751	-0.821137	-1.51249	-0.618113	-1.53342	0.506606	0.165932	0.0394277	0.424205	0.493413	0.00121204	0.899556	0.0223707	-0.436921	1.11884	0.211704	-1.15787	-0.0788695	actin filament-based movement;actin filament-based process;actin-mediated cell contraction;actin-myosin filament sliding;cellular component movement;cellular component organization;cellular component organization or biogenesis;cellular membrane organization;cellular process;defense response;immune response;immune system process;innate immune response;membrane organization;metabolic process;multic…	adenyl nucleotide binding;adenyl ribonucleotide binding;ATP binding;binding;catalytic activity;hydrolase activity;hydrolase activity, acting on acid anhydrides;hydrolase activity, acting on acid anhydrides, in phosphorus-containing anhydrides;microfilament motor activity;motor activity;nucleoside-triphosphatase activity;nucleotide binding;purine nucleotide binding;purine ribonucleoside triphospha…	A band;actomyosin contractile ring;cell cortex part;cell division site part;cell junction;cell part;cell-cell junction;contractile fiber;contractile fiber part;contractile ring;cytoplasmic part;cytoskeletal part;cytosol;Golgi apparatus;intracellular membrane-bounded organelle;intracellular non-membrane-bounded organelle;intracellular organelle;intracellular organelle part;intracellular part;macro…	Tight junction;Viral myocarditis	+	R1_Pel_S1_Pel;R1_Pel_S3_Pel	0.939	2.09531	Q9UKX2	Q9UKX2_S1308	MYH2	EALVSQLsR
-0.383436	-0.410679	1.50094	0.304411	0.95617	2.80744	-2.01101	-1.06805	-1.47543	-0.858678	0.646334	-0.304873	-1.40819	-0.67603	-0.0204842	0.511247	1.78166	1.3157	0.340934	-1.12585	-0.875777	-0.58103	-1.21737	0.237207	-0.471991	0.102934	0.124194	0.57554	0.782951	0.806755	-0.0611429	-0.395506	0.948579	0.339082	-0.435856	-0.30069	actin filament-based movement;actin filament-based process;actin-mediated cell contraction;actin-myosin filament sliding;cellular component movement;cellular component organization;cellular component organization or biogenesis;cellular membrane organization;cellular process;defense response;immune response;immune system process;innate immune response;membrane organization;metabolic process;multic…	adenyl nucleotide binding;adenyl ribonucleotide binding;ATP binding;binding;catalytic activity;hydrolase activity;hydrolase activity, acting on acid anhydrides;hydrolase activity, acting on acid anhydrides, in phosphorus-containing anhydrides;microfilament motor activity;motor activity;nucleoside-triphosphatase activity;nucleotide binding;purine nucleotide binding;purine ribonucleoside triphospha…	A band;actomyosin contractile ring;cell cortex part;cell division site part;cell junction;cell part;cell-cell junction;contractile fiber;contractile fiber part;contractile ring;cytoplasmic part;cytoskeletal part;cytosol;Golgi apparatus;intracellular membrane-bounded organelle;intracellular non-membrane-bounded organelle;intracellular organelle;intracellular organelle part;intracellular part;macro…	Tight junction;Viral myocarditis	+	R1_Pel_S1_Pel	1	1.39197	Q9UKX2	Q9UKX2_T1738	MYH2	KKLEtDISQMQGEMEDILQEAR;KKLEtDIsQMQGEMEDILQEAR;KLEtDISQMQGEMEDILQEAR;KLEtDIsQMQGEMEDILQEAR;LEtDISQMQGEMEDILQEAR;LEtDIsQMQGEMEDILQEAR
-0.689895	-0.761475	-0.542724	-1.24794	-1.15696	-1.2414	0.552946	1.23926	0.833137	0.293343	0.638073	1.32408	-0.941875	-0.0588931	-0.94776	-0.596724	-0.186746	0.00547816	0.361415	1.46636	0.597382	0.635426	0.579511	0.467661	-0.988049	-0.413766	-0.427408	-1.40258	-2.36449	-0.832219	0.87964	2.2523	1.00489	0.539079	-0.236903	1.36782		14-3-3 protein binding;actinin binding;alpha-actinin binding;binding;cytoskeletal protein binding;muscle alpha-actinin binding;protein binding	actin cytoskeleton;adherens junction;anchoring junction;cell junction;cell part;cell-substrate adherens junction;cell-substrate junction;contractile fiber part;cytoplasmic part;cytoskeleton;focal adhesion;intracellular membrane-bounded organelle;intracellular non-membrane-bounded organelle;intracellular organelle;intracellular part;membrane-bounded organelle;non-membrane-bounded organelle;nucleus…		+	S1_Pel_R1_Pel;S1_Pel_R3_Pel;S1_Pel_R4_Pel;S3_Pel_R1_Pel;S3_Pel_R3_Pel;S3_Pel_R4_Pel;S4_Pel_R1_Pel;S4_Pel_R3_Pel;S4_Pel_R4_Pel	0.933	7.21756	Q9UMS6	Q9UMS6_S604	SYNPO2	PFPGSVNQPATPFsPTR;TAKPFPGSVNQPATPFsPTR;TAKPFPGSVNQPAtPFsPTR
-2.21703	-1.35434	0.535133	-1.38053	-1.42152	-0.482054	-0.352647	0.235411	-0.351996	-0.0902019	0.683342	1.14871	-0.232411	0.242805	-0.766757	-0.944667	-0.525889	0.308829	1.13873	1.04606	1.32414	0.727569	0.0350442	0.283707	-1.13589	0.0183216	-0.929833	-1.11412	-0.712326	-0.0910892	1.31291	2.78007	0.0932141	0.802466	0.632655	0.754195		14-3-3 protein binding;actinin binding;alpha-actinin binding;binding;cytoskeletal protein binding;muscle alpha-actinin binding;protein binding	actin cytoskeleton;adherens junction;anchoring junction;cell junction;cell part;cell-substrate adherens junction;cell-substrate junction;contractile fiber part;cytoplasmic part;cytoskeleton;focal adhesion;intracellular membrane-bounded organelle;intracellular non-membrane-bounded organelle;intracellular organelle;intracellular part;membrane-bounded organelle;non-membrane-bounded organelle;nucleus…		+	S1_Pel_R1_Pel;S3_Pel_R1_Pel;S3_Pel_R4_Pel;S4_Pel_R1_Pel;S4_Pel_R3_Pel;S4_Pel_R4_Pel	0.936	4.32355	Q9UMS6	Q9UMS6_S638	SYNPO2	GVSsPIAGPAQPPPWPQPAPWSQPAFYDSSER
0.437513	0.132286	0.449196	-0.722108	-1.37425	-0.357417	0.177321	1.1152	0.706863	-0.26403	0.50425	1.08076	-0.0797709	0.101054	0.029282	0.110388	-0.073088	0.48972	0.658004	0.332158	1.01065	-0.0155315	-0.145048	0.0991662	-2.57249	0.152736	-0.114279	-0.58053	-2.19399	-3.3474	0.428836	1.46734	0.928038	0.346557	0.544064	0.538545		14-3-3 protein binding;actinin binding;alpha-actinin binding;binding;cytoskeletal protein binding;muscle alpha-actinin binding;protein binding	actin cytoskeleton;adherens junction;anchoring junction;cell junction;cell part;cell-substrate adherens junction;cell-substrate junction;contractile fiber part;cytoplasmic part;cytoskeleton;focal adhesion;intracellular membrane-bounded organelle;intracellular non-membrane-bounded organelle;intracellular organelle;intracellular part;membrane-bounded organelle;non-membrane-bounded organelle;nucleus…		+	R3_Pel_R4_Pel;S1_Pel_R4_Pel;S3_Pel_R4_Pel;S4_Pel_R4_Pel	0.925	3.5373	Q9UMS6	Q9UMS6_S705	SYNPO2	VsPNPELLSLLQNSEGK;VsPNPELLSLLQNSEGKR
-1.5574	-1.21008	0.160675	-1.25674	-1.84419	-0.0236864	0.171227	0.242116	0.688308	0.647989	0.541385	1.26676	-0.707293	0.500181	-0.796614	-1.30292	-0.347767	0.578487	0.613138	0.992418	1.26962	1.21687	0.762851	0.898324	-0.822682	-0.507742	-0.148393	-1.95787	-2.15476	-0.653264	0.594198	1.00246	0.571329	1.02863	0.928169	0.616254		14-3-3 protein binding;actinin binding;alpha-actinin binding;binding;cytoskeletal protein binding;muscle alpha-actinin binding;protein binding	actin cytoskeleton;adherens junction;anchoring junction;cell junction;cell part;cell-substrate adherens junction;cell-substrate junction;contractile fiber part;cytoplasmic part;cytoskeleton;focal adhesion;intracellular membrane-bounded organelle;intracellular non-membrane-bounded organelle;intracellular organelle;intracellular part;membrane-bounded organelle;non-membrane-bounded organelle;nucleus…		+	S1_Pel_R1_Pel;S1_Pel_R4_Pel;S3_Pel_R1_Pel;S3_Pel_R3_Pel;S3_Pel_R4_Pel;S4_Pel_R1_Pel;S4_Pel_R3_Pel;S4_Pel_R4_Pel	0.931	6.11187	Q9UMS6	Q9UMS6_S777	SYNPO2	SSSSQPVTPVsPVWSPGVAPTQPPAFPTSNPSK;SSSSQPVTPVsPVWsPGVAPTQPPAFPTSNPSK;SSSSQPVtPVsPVWSPGVAPTQPPAFPTSNPSK;SSSSQPVtPVsPVWsPGVAPTQPPAFPTSNPSK;SSSsQPVTPVsPVWSPGVAPTQPPAFPTSNPSK;SSSsQPVtPVsPVWSPGVAPTQPPAFPTSNPSK;SSsSQPVTPVsPVWSPGVAPTQPPAFPTSNPSK;sSSSQPVTPVsPVWSPGVAPTQPPAFPTSNPSK;sSSSQPVtPVsPVWSPGVAPTQPPAFPTSNPSK
-1.19829	-1.28981	0.22171	-1.43721	-1.73138	-0.126306	0.533929	0.617689	0.808017	0.862292	0.618224	1.41568	-0.64596	0.0806678	-0.686267	-0.688585	-0.419849	-0.0396803	0.628584	0.948679	1.07809	0.934454	0.798095	0.915558	-0.485451	-0.646044	-2.78352	-1.02357	-1.52463	-0.456373	0.548493	1.16412	0.706556	0.710122	0.619967	0.972017		14-3-3 protein binding;actinin binding;alpha-actinin binding;binding;cytoskeletal protein binding;muscle alpha-actinin binding;protein binding	actin cytoskeleton;adherens junction;anchoring junction;cell junction;cell part;cell-substrate adherens junction;cell-substrate junction;contractile fiber part;cytoplasmic part;cytoskeleton;focal adhesion;intracellular membrane-bounded organelle;intracellular non-membrane-bounded organelle;intracellular organelle;intracellular part;membrane-bounded organelle;non-membrane-bounded organelle;nucleus…		+	S1_Pel_R1_Pel;S1_Pel_R3_Pel;S1_Pel_R4_Pel;S3_Pel_R1_Pel;S3_Pel_R3_Pel;S3_Pel_R4_Pel;S4_Pel_R1_Pel;S4_Pel_R3_Pel;S4_Pel_R4_Pel	0.932	7.64157	Q9UMS6	Q9UMS6_S781	SYNPO2	SSSSQPVTPVSPVWsPGVAPTQPPAFPTSNPSK;SSSSQPVTPVsPVWsPGVAPTQPPAFPTSNPSK;SSSSQPVtPVSPVWsPGVAPTQPPAFPTSNPSK;SSSSQPVtPVsPVWsPGVAPTQPPAFPTSNPSK;TPPPVAPKPAVKSSSSQPVTPVSPVWsPGVAPTQPPAFPTSNPSK
0.377541	0.143528	1.59132	0.707897	0.22245	0.978829	-0.441638	-1.566	-1.92631	-0.645707	-0.539999	-0.543769	0.459986	-1.19596	0.122428	2.05121	0.485174	1.27235	-0.404358	-0.730569	-1.23388	0.215436	-0.656442	-0.0479183	0.0966149	1.11772	0.89387	0.970876	-0.323221	1.93025	-1.95873	-0.306367	-1.29656	0.671474	-0.215554	-0.275981		14-3-3 protein binding;actinin binding;alpha-actinin binding;binding;cytoskeletal protein binding;muscle alpha-actinin binding;protein binding	actin cytoskeleton;adherens junction;anchoring junction;cell junction;cell part;cell-substrate adherens junction;cell-substrate junction;contractile fiber part;cytoplasmic part;cytoskeleton;focal adhesion;intracellular membrane-bounded organelle;intracellular non-membrane-bounded organelle;intracellular organelle;intracellular part;membrane-bounded organelle;non-membrane-bounded organelle;nucleus…		+	R1_Pel_S1_Pel;R3_Pel_S1_Pel;R4_Pel_S1_Pel	0.939	2.96032	Q9UMS6	Q9UMS6_S906	SYNPO2	AQSPtPsLPASWK;AQsPTPsLPASWK
-1.1373	-1.02878	-0.145476	-1.02804	-1.39381	-0.667065	-0.403262	1.32116	1.02322	-0.0424604	1.02262	0.90035	-0.747625	2.24047	-0.184348	-0.930956	-0.408598	0.497783	-0.316938	0.776161	1.27392	0.638572	-0.212902	-0.0370228	-1.21937	-0.583345	-0.586073	-1.16459	-1.02948	-0.813159	-0.0768335	2.5858	1.53012	0.471877	-0.364813	0.240194		14-3-3 protein binding;actinin binding;alpha-actinin binding;binding;cytoskeletal protein binding;muscle alpha-actinin binding;protein binding	actin cytoskeleton;adherens junction;anchoring junction;cell junction;cell part;cell-substrate adherens junction;cell-substrate junction;contractile fiber part;cytoplasmic part;cytoskeleton;focal adhesion;intracellular membrane-bounded organelle;intracellular non-membrane-bounded organelle;intracellular organelle;intracellular part;membrane-bounded organelle;non-membrane-bounded organelle;nucleus…		+	S1_Pel_R1_Pel;S1_Pel_R4_Pel;S4_Pel_R1_Pel;S4_Pel_R4_Pel	0.922	2.7934	Q9UMS6	Q9UMS6_S930	SYNPO2	APPPVAYNPIHsPSYPLAALK
-1.66414	-1.37016	-0.948853	0.378792	-1.48073	-1.26346	-1.47142	-1.26907	0.40966	-1.49681	0.853746	0.78479	0.743726	0.561138	0.575693	0.641356	0.637622	0.892248	0.807134	0.77238	0.791011	0.696759	0.723589	0.825842	0.447946	0.668518	0.697011	0.387729	0.484501	-1.68548	0.881246	-1.41467	-1.30019	0.89003	-1.08782	0.900319		14-3-3 protein binding;actinin binding;alpha-actinin binding;binding;cytoskeletal protein binding;muscle alpha-actinin binding;protein binding	actin cytoskeleton;adherens junction;anchoring junction;cell junction;cell part;cell-substrate adherens junction;cell-substrate junction;contractile fiber part;cytoplasmic part;cytoskeleton;focal adhesion;intracellular membrane-bounded organelle;intracellular non-membrane-bounded organelle;intracellular organelle;intracellular part;membrane-bounded organelle;non-membrane-bounded organelle;nucleus…		+	R3_Pel_R1_Pel;S3_Pel_R1_Pel	0.902	2.22292	Q9UMS6	Q9UMS6_T610	SYNPO2	NMtSPIADFPAPPPYSAVTPPPDAFSR;NMtSPIADFPAPPPYSAVtPPPDAFSR
-2.12068	-1.09606	-0.167943	-1.28956	-1.00502	-0.131762	-0.952212	0.829757	-0.123388	-0.418646	0.844438	2.00782	-0.741244	-0.808069	-0.656576	0.0174386	-0.23485	0.644524	0.288746	1.36172	0.961995	0.0554735	-0.0118655	0.483858	-1.28737	-0.358767	-0.033038	-1.08455	-0.767975	-0.325465	0.455957	2.9347	1.00311	0.765413	0.0829016	0.877197		14-3-3 protein binding;actinin binding;alpha-actinin binding;binding;cytoskeletal protein binding;muscle alpha-actinin binding;protein binding	actin cytoskeleton;adherens junction;anchoring junction;cell junction;cell part;cell-substrate adherens junction;cell-substrate junction;contractile fiber part;cytoplasmic part;cytoskeleton;focal adhesion;intracellular membrane-bounded organelle;intracellular non-membrane-bounded organelle;intracellular organelle;intracellular part;membrane-bounded organelle;non-membrane-bounded organelle;nucleus…		+	S3_Pel_R1_Pel;S4_Pel_R1_Pel;S4_Pel_R4_Pel	0.939	3.17268	Q9UMS6	Q9UMS6_T626	SYNPO2	NMTSPIADFPAPPPYSAVtPPPDAFSR;NMTsPIADFPAPPPYSAVtPPPDAFSR;NMtSPIADFPAPPPYSAVtPPPDAFSR
-1.38294	-0.557437	-1.48638	-2.52019	-0.279789	0.354473	0.478038	0.718503	0.680803	0.546055	0.612706	1.05813	-0.126654	1.39301	-0.598311	-0.353569	0.361559	0.472146	0.521416	0.759635	0.843532	0.748113	0.717437	0.62263	-1.19785	-1.67552	-1.69992	-1.47925	-0.347907	-1.48286	0.703381	1.13463	0.754776	0.745529	0.177281	0.784786		14-3-3 protein binding;actinin binding;alpha-actinin binding;binding;cytoskeletal protein binding;muscle alpha-actinin binding;protein binding	actin cytoskeleton;adherens junction;anchoring junction;cell junction;cell part;cell-substrate adherens junction;cell-substrate junction;contractile fiber part;cytoplasmic part;cytoskeleton;focal adhesion;intracellular membrane-bounded organelle;intracellular non-membrane-bounded organelle;intracellular organelle;intracellular part;membrane-bounded organelle;non-membrane-bounded organelle;nucleus…		+	R3_Pel_R1_Pel;R3_Pel_R4_Pel;S1_Pel_R1_Pel;S1_Pel_R4_Pel;S3_Pel_R1_Pel;S3_Pel_R4_Pel;S4_Pel_R1_Pel;S4_Pel_R4_Pel	0.914	6.77192	Q9UMS6	Q9UMS6_T774	SYNPO2	SSSSQPVtPVSPVWSPGVAPTQPPAFPTSNPSK;SSSSQPVtPVSPVWsPGVAPTQPPAFPTSNPSK;SSSSQPVtPVsPVWSPGVAPTQPPAFPTSNPSK;SSSSQPVtPVsPVWsPGVAPTQPPAFPTSNPSK;SSSsQPVtPVSPVWSPGVAPTQPPAFPTSNPSK;SSSsQPVtPVsPVWSPGVAPTQPPAFPTSNPSK;sSSSQPVtPVSPVWSPGVAPTQPPAFPTSNPSK;sSSSQPVtPVsPVWSPGVAPTQPPAFPTSNPSK
-0.995079	1.11307	1.30215	1.51184	1.30246	1.3639	-0.942112	-0.237907	-1.00996	-0.465856	-0.904063	-0.952742	1.22057	-0.877094	-0.514835	1.65931	-0.39915	-1.0713	-0.672687	-1.19743	-0.725285	-0.539421	-0.540963	-1.1531	-0.76424	1.14618	1.02353	1.60853	0.460934	-0.928673	-0.376013	1.26851	1.29893	-0.262795	-0.270913	-0.478306	anatomical structure development;biological regulation;cell differentiation;cell surface receptor linked signaling pathway;cellular developmental process;cellular process;cellular response to stimulus;developmental process;negative regulation of biological process;negative regulation of cell communication;negative regulation of cell proliferation;negative regulation of cellular process;negative r…		cell part;cell projection part;centrosome;cytoplasm;cytoplasmic part;cytoskeletal part;cytosol;extracellular membrane-bounded organelle;extracellular organelle;extracellular region part;extracellular vesicular exosome;Golgi apparatus;growth cone;intracellular membrane-bounded organelle;intracellular non-membrane-bounded organelle;intracellular organelle;intracellular organelle part;intracellular …		+	R1_Pel_S1_Pel;R1_Pel_S3_Pel	0.886	2.12333	Q9UN36	Q9UN36_T334	NDRG2	SRTAsLtSAASVDGNR;SRtASLtSAASVDGNR;sRTASLtSAASVDGNR
1.27983	1.11002	1.04189	0.743293	-0.449528	1.391	-1.13266	-1.11996	-0.854729	-0.830442	-0.682546	-0.905031	0.153055	-1.28838	0.813004	1.19468	-0.463309	-0.701907	-1.95852	-0.733177	-0.705429	-1.03621	-0.623816	-1.07989	1.20687	1.20222	1.36017	0.887395	-0.66613	-0.608592	-0.442486	0.841677	0.33796	1.14412	1.56606	0.00947937	actin cytoskeleton organization;actin filament-based process;actomyosin structure organization;cellular component organization;cellular component organization at cellular level;cellular component organization or biogenesis;cellular component organization or biogenesis at cellular level;cellular process;cytoskeleton organization;organelle organization	binding;cation binding;ion binding;metal ion binding;transition metal ion binding;zinc ion binding			+	R1_Pel_S1_Pel;R1_Pel_S3_Pel;R4_Pel_S1_Pel;R4_Pel_S3_Pel;S4_Pel_S1_Pel;S4_Pel_S3_Pel	0.94	4.01792	Q9UPQ0	Q9UPQ0_T215	LIMCH1	SRQtPsPDVVLR
-1.26748	-1.53432	-0.874652	-1.16212	-0.933076	0.310052	0.775699	0.920217	-0.95475	0.863501	1.16361	0.699806	-0.16849	0.622744	-1.49335	-1.45502	0.650377	0.0779765	0.744114	0.956316	0.393327	0.932939	0.863525	0.649968	0.0722248	-0.806287	0.230116	-1.43949	-1.63873	-0.943376	1.20406	1.12127	0.756086	1.12554	-1.48526	1.02294	biological regulation;cell communication;cell-cell signaling;cellular process;cellular response to stimulus;multicellular organismal process;muscle contraction;muscle system process;neuromuscular synaptic transmission;regulation of biological process;regulation of cellular process;response to stimulus;signal transduction;signaling;striated muscle contraction;synaptic transmission;system process	binding;cation binding;ion binding;metal ion binding;transition metal ion binding;zinc ion binding	axon;cell junction;cell part;cell projection;cytoplasm;extrinsic to internal side of plasma membrane;extrinsic to membrane;extrinsic to plasma membrane;intracellular part;macromolecular complex;membrane;membrane part;neuron projection;plasma membrane;plasma membrane part;protein complex;sarcolemma;synapse		+	S1_Pel_R1_Pel;S3_Pel_R1_Pel;S3_Pel_R4_Pel;S4_Pel_R1_Pel;S4_Pel_R4_Pel	0.925	2.96417	Q9Y4J8	Q9Y4J8_S662	DTNA	TQFEDLVPsPTSEK
0.154179	-0.556658	-0.215025	-0.375726	-0.298732	0.0592339	0.360088	1.20764	1.22008	0.186067	1.28976	0.831583	-0.448687	0.491733	-0.347047	-1.41919	-0.286337	0.155586	0.217053	0.638364	0.777172	0.354289	0.504234	0.246741	-0.123277	-2.18412	-1.36384	-1.61634	-2.06088	-2.37886	0.774731	1.34838	1.47814	0.873162	0.0550952	0.451406	biological regulation;positive regulation of actin filament bundle assembly;positive regulation of biological process;positive regulation of biosynthetic process;positive regulation of cellular biosynthetic process;positive regulation of cellular component organization;positive regulation of cellular metabolic process;positive regulation of cellular process;positive regulation of cytoskeleton org…	binding;identical protein binding;protein binding	bleb;cell part;cell projection;cytoplasm;cytoskeleton;intracellular membrane-bounded organelle;intracellular non-membrane-bounded organelle;intracellular organelle;intracellular part;membrane;membrane-bounded organelle;non-membrane-bounded organelle;nucleus;organelle		+	R1_Pel_R4_Pel;R3_Pel_R4_Pel;S1_Pel_R1_Pel;S1_Pel_R3_Pel;S1_Pel_R4_Pel;S3_Pel_R4_Pel;S4_Pel_R1_Pel;S4_Pel_R3_Pel;S4_Pel_R4_Pel	1	7.55379	Q9Y613	Q9Y613_S523	FHOD1	EPLIPAsPK

## Sheet: Fig. 3D
Pellet Phos Down
Mean Log2 FC (S1R1)	Mean Log2 FC (S3R3)	Mean Log2 FC (S4R4)	Index	Gene
-2.18812	-1.23142	-1.08161	A8MZF0_S162	PRR33
-1.60971	0.521568	0.100107	E7EW31_S179	PROB1		condition value						Pairwise Wilcoxon test (Non Parametric)
-0.891848	-0.0789051	2.43814	E7EW31_T776	PROB1		Mean Log2 FC (S1R1):68 Min. :-6.23089						Condition	p-Value	Star
-1.06114	-0.83773	-0.530354	O00499_S303	BIN1		Mean Log2 FC (S3R3):68 1st Qu.:-0.90785						S1R1 vs S3R3	0.002	**
-0.700859	-0.548317	-0.333061	O15273_T109	TCAP		Mean Log2 FC (S4R4):68 Median :-0.42156						S1R1 vs S4R4	1.2e-11	****
-0.103271	-0.214035	0.751713	O43847_S94	NRDC		Mean :-0.52970						S3R3 vs S4R4	4.8e-07	****
-1.49612	-0.820848	-0.743925	O94826_S91	TOMM70		3rd Qu.:-0.06427
-1.52669	-0.313196	0.0746403	O95425_S261	SVIL		Max. : 2.43814
-0.991583	-0.400604	-0.443594	O95425_S319	SVIL
-0.952038	-1.35586	-0.0727348	O95810_S293	CAVIN2
-1.46643	-0.539915	-0.279608	O95817_S173	BAG3
-0.613234	-0.320482	-0.230076	P05976_S73	MYL1
-0.52449	-0.415478	-0.368357	P11217_S514	PYGM
-6.23089	-0.197832	-1.75404	P13807_S641	GYS1
-1.01117	-0.321676	-0.718437	P13807_S710	GYS1
-0.45871	-0.189861	0.341885	P19237_S169	TNNI1
-0.856655	-0.370852	0.15313	P20929_S6609	NEB
-1.15047	-0.00316238	0.347143	P20929_S6630	NEB
-0.0971069	-0.235483	0.388212	P20929_T5248	NEB
-0.234606	0.150389	0.150488	P21817_S2843	RYR1
-0.395088	-0.330626	1.33677	P27816_S1073	MAP4
-3.03966	-1.32949	-0.0916843	P35609_T744	ACTN2
-0.61701	-1.62195	-0.00533867	P54296_S1315	MYOM2
-1.03593	-1.07545	0.4851	Q00872_S825	MYBPC1
-0.728041	-0.560562	0.343216	Q01484_S3823	ANK2
-1.17632	-0.699162	-0.713955	Q13501_T269	SQSTM1
-0.254021	-0.0944824	0.167244	Q13627_Y321	DYRK1A
0.0735626	-0.283636	0.672968	Q13884_S219	SNTB1
0.145203	-0.333672	0.406271	Q14324_S44	MYBPC2
-0.752121	-0.475365	-0.0173473	Q15149_S4613	PLEC
-1.65213	-1.22395	-0.758465	Q15772_S549	SPEG
-1.88178	-0.268862	0.835545	Q15772_S853	SPEG
-0.815136	-0.954355	0.273726	Q5VST9_S238	OBSCN
-1.37814	-0.33271	-0.516151	Q5VST9_S4787	OBSCN
-0.259132	-0.0238857	0.606953	Q5VST9_S6831	OBSCN
-0.707703	-0.240864	-0.357868	Q5VST9_T4813	OBSCN
-0.118084	-0.805992	0.0702858	Q5VST9_T5569	OBSCN
-0.62705	-0.395567	0.531792	Q5VWP3_S135	MLIP
-1.33742	-1.28954	-0.391083	Q6H8Q1_S476	ABLIM2
-1.59737	-1.09675	-1.48735	Q6P5Q4_S186	LMOD2
-3.28366	-1.09032	-0.71744	Q6P5Q4_T384	LMOD2
-1.25253	-0.8263	-1.10115	Q8N3V7_S863	SYNPO
-0.424206	-0.447922	1.47749	Q8WWI1_S1586	LMO7
-3.05889	-4.14742	0.0768547	Q8WZ42_S1413	TTN
-2.82294	-4.13602	0.358301	Q8WZ42_S1418	TTN
-0.418915	-0.332787	0.110817	Q8WZ42_S265	TTN
-0.326174	-0.958218	0.621355	Q8WZ42_T13931	TTN
-0.597589	-0.527264	0.398188	Q8WZ42_T21322	TTN
-1.25858	-1.17985	0.808189	Q8WZ42_Y13953	TTN
-0.252203	-0.0215034	1.00932	Q92614_S1970	MYO18A
-0.284428	0.209698	1.10213	Q92614_S1974	MYO18A
-1.46718	-0.592388	0.337669	Q96A32_T10	MYLPF
-0.721386	0.374067	1.52373	Q96L96_S1390	ALPK3
-0.752558	-1.29049	-0.589949	Q9BX66_T1004	SORBS1
-0.947166	-0.564516	-0.735245	Q9H1R3_S143	MYLK2
-0.0135422	-0.263126	0.720276	Q9H7C4_S325	SYNC
-0.316437	-0.130859	0.383036	Q9H987_S143	SYNPO2L
-0.531227	-0.219872	-0.019249	Q9H987_S178	SYNPO2L
-0.46151	-0.228312	-0.0388966	Q9H987_S345	SYNPO2L
-0.730122	-0.506523	-0.639206	Q9H987_S374	SYNPO2L
-1.09379	-0.812981	-0.4517	Q9NP98_S80	MYOZ1
-0.0963955	-0.613657	1.51761	Q9NYF8_S177	BCLAF1
-0.959042	-0.298012	-0.194788	Q9UKX2_S1308	MYH2
-0.718351	-0.344769	-0.133209	Q9UKX2_T1738	MYH2
-0.639536	-0.399698	-0.532747	Q9UMS6_S906	SYNPO2
1.74618	0.237165	-0.894743	Q9UMS6_T610	SYNPO2
-2.92225	-1.40069	-0.395046	Q9UN36_T334	NDRG2
-1.97392	-1.08402	0.0138893	Q9UPQ0_T215	LIMCH1

## Sheet: Fig. 3E
Pellet Phos UP
Mean Log2 FC (S1R1)	Mean Log2 FC (S3R3)	Mean Log2 FC (S4R4)	Index	Gene
1.00888	0.559998	2.22307	A4UGR9_S1629	XIRP2		condition value					Pairwise Wilcoxon test (Non Parametric)
0.964975	-0.114204	0.490271	A4UGR9_S497	XIRP2		Mean Log2 FC (S1R1):139 Min. :-0.9226					Condition	p-Value	Star
1.63917	0.0430279	1.42736	A4UGR9_S868	XIRP2		Mean Log2 FC (S3R3):139 1st Qu.: 0.8064					S1R1 vs S3R3	8.6e-08	****
-0.0832901	0.0696659	1.87474	D6RIA3_S1187	C4orf54		Mean Log2 FC (S4R4):139 Median : 1.4298					S1R1 vs S4R4	0.0012	**
3.75528	3.1803	2.90272	D6RIA3_S1423	C4orf54		Mean : 1.6673					S3R3 vs S4R4	2.22e-16	****
2.45189	0.706135	1.70363	D6RIA3_S1707	C4orf54		3rd Qu.: 2.4318
0.133173	0.10741	0.743759	E7EW31_S260	PROB1		Max. : 5.7867
0.192259	0.212343	0.576717	E7EW31_S803	PROB1
1.68239	0.897133	2.61678	E9PAV3_S1018	NACA
2.57647	1.16045	2.64695	E9PAV3_S1066	NACA
1.14054	0.238781	1.5468	E9PAV3_S1135	NACA
2.091	0.75301	3.07026	E9PAV3_S1296	NACA
2.86311	1.42826	3.29892	E9PAV3_S1623	NACA
1.37719	1.34685	1.89828	E9PAV3_S1639	NACA
1.51142	0.759964	1.38364	E9PAV3_S585	NACA
0.273125	0.174257	1.14277	E9PAV3_S829	NACA
2.59158	1.83714	3.59667	E9PAV3_S860	NACA
1.49122	0.902534	2.2924	E9PAV3_S874	NACA
1.76416	0.909733	2.17039	E9PAV3_S949	NACA
0.987043	1.45017	2.0737	E9PAV3_S972	NACA
2.06786	0.31867	4.12732	O00499_T323	BIN1
0.676222	0.674582	1.09717	O15061_S1044	SYNM
3.69473	3.7835	4.07872	O15061_S1049	SYNM
3.59005	2.52837	5.46146	O15061_S1107	SYNM
2.50067	2.33901	2.37714	O15061_S653	SYNM
2.52105	1.56567	3.04349	O15061_S777	SYNM
1.91049	2.22732	2.69204	O15061_T598	SYNM
0.883762	0.20546	0.859245	O75112_S243	LDB3
0.752319	0.313568	1.34986	O75569_S18	PRKRA
1.60254	0.0836201	2.86538	O95425_S245	SVIL
2.37104	1.73037	2.62694	O95425_S270	SVIL
0.977825	0.612194	1.24449	O95425_S769	SVIL
2.367	0.594152	2.77362	O95817_S385	BAG3
2.47625	0.439728	2.52412	O95817_S386	BAG3
5.78668	4.56518	5.25093	P02511_S59	CRYAB
5.21922	4.21154	4.75811	P04792_S15	HSPB1
2.02419	1.33722	1.819	P04792_S199	HSPB1
5.28525	3.89478	4.43378	P04792_S65	HSPB1
2.79787	2.68693	2.70617	P04792_S82	HSPB1
-0.108097	0.80485	1.2822	P06733_S141	ENO1
0.942984	-0.922609	1.46723	P10636_S516	MAPT
2.70207	2.05123	2.84096	P11532_S2437	DMD
2.61315	1.45329	2.67932	P11532_S3490	DMD
1.41662	1.4239	1.72945	P13807_S727	GYS1
1.79642	1.0351	2.56921	P19237_S183	TNNI1
0.811844	0.0571194	2.14709	P20807_S19	CAPN3
1.71762	1.08039	2.24443	P20929_T6353	NEB
0.892288	0.559526	1.40106	P20929_T6384	NEB
2.1447	1.22965	1.27582	P20929_T6450	NEB
1.57753	0.358145	2.17525	P23396_T221	RPS3
1.47105	1.42975	3.36985	P27816_S280	MAP4
1.53876	0.870714	1.15524	P35609_T237	ACTN2
1.22397	-0.0796318	1.16704	P35611_S358	ADD1
0.610935	0.587397	1.23635	P45378_S167	TNNT3
1.30737	0.912682	1.60544	P47756_S263	CAPZB
1.78246	1.52533	2.4329	P54725_S123	RAD23A
4.37668	1.89132	3.46979	Q00872_T166	MYBPC1
4.07301	2.91557	4.38109	Q00872_T31	MYBPC1
1.13586	0.753729	0.687996	Q00G26_S277	PLIN5
1.04784	0.94088	1.93361	Q0ZGT2_S357	NEXN
0.626308	0.652592	1.51627	Q0ZGT2_S564	NEXN
1.73668	1.24694	2.69375	Q12955_S4298	ANK3
1.21626	1.50376	2.43836	Q13424_S189	SNTA1
0.580011	1.67416	2.5323	Q13501_S272	SQSTM1
1.55975	0.90263	2.42047	Q13884_S87	SNTB1
1.57902	0.687525	1.25457	Q14247_S405	CTTN
2.7441	1.16536	2.81868	Q14247_S418	CTTN
0.482592	-0.0618763	0.81991	Q14315_S2395	FLNC
2.35178	0.995247	1.8247	Q15149_S1047	PLEC
3.4713	1.18241	4.81856	Q15149_S1435	PLEC
0.418081	0.211788	0.999767	Q15149_S1732	PLEC
1.01334	0.0649891	2.20044	Q15149_S4396	PLEC
1.48863	1.22391	1.60815	Q15772_S557	SPEG
3.52043	2.75109	3.79055	Q53GG5_S89	PDLIM3
2.05874	0.535379	2.91988	Q53GG5_S93	PDLIM3
2.05805	1.42837	2.43178	Q5SV97_S242	PERM1
2.09433	1.60706	1.81878	Q5VST9_S395	OBSCN
0.6663	0.985256	1.1778	Q5VST9_S4076	OBSCN
1.1449	0.792582	2.34746	Q5VST9_S5669	OBSCN
1.29423	0.513548	2.09654	Q5VST9_S6851	OBSCN
1.01301	0.912045	1.19178	Q5VTT5_S90	MYOM3
0.302923	-0.149132	1.2273	Q5VWP3_S67	MLIP
0.431696	0.557882	1.36687	Q6JBY9_S216	RCSD1
1.67579	0.74692	2.0635	Q6QEF8_S424	CORO6
2.83511	-0.0577526	0.830088	Q702N8_S138	XIRP1
1.95617	0.445381	1.79448	Q702N8_S1669	XIRP1
1.30471	0.296789	0.975637	Q702N8_S205	XIRP1
1.28488	0.398796	0.865326	Q702N8_S208	XIRP1
2.4407	1.7536	1.8041	Q702N8_S213	XIRP1
3.11964	1.40038	3.62624	Q702N8_S295	XIRP1
3.33712	1.65607	3.17576	Q702N8_S481	XIRP1
2.81162	2.93065	2.97092	Q702N8_S529	XIRP1
1.91237	1.54715	2.38715	Q86TC9_S643	MYPN
1.95257	1.51773	2.35985	Q86TC9_S644	MYPN
3.51603	0.972443	3.44875	Q86TC9_S684	MYPN
0.106066	0.010294	0.646816	Q86TC9_S928	MYPN
0.264404	-0.175722	0.933613	Q86VF7_S152	NRAP
1.09296	1.26335	2.7898	Q8N3K9_S1283	CMYA5
1.72746	1.97712	2.84818	Q8N3K9_S1717	CMYA5
2.11206	1.14909	2.4468	Q8N3K9_S2207	CMYA5
1.22434	0.29933	1.48155	Q8N3K9_S767	CMYA5
1.30731	1.20339	1.37981	Q8N3V7_S263	SYNPO
1.96956	1.63177	2.16933	Q8N3V7_S819	SYNPO
0.375889	1.69841	0.796692	Q8N3V7_S890	SYNPO
4.44018	4.1081	5.37605	Q8TDC0_S112	MYOZ3
0.37364	0.0992355	0.786943	Q8TDC0_S31	MYOZ3
0.0293121	0.102715	2.55323	Q8WWI1_S540	LMO7
0.550186	0.278099	1.31011	Q8WWI1_S867	LMO7
1.42843	1.44457	1.93294	Q8WX93_S641	PALLD
1.47491	0.184242	1.56893	Q8WX93_S893	PALLD
0.41272	0.0622063	1.0094	Q8WZ42_S1799	TTN
0.899706	0.242752	0.966061	Q8WZ42_S214	TTN
0.00709343	2.29829	1.65907	Q8WZ42_S26458	TTN
0.310326	0.0324936	1.11681	Q8WZ42_S33624	TTN
3.90997	2.64649	3.75464	Q8WZ42_S33976	TTN
0.931772	0.416641	1.14956	Q8WZ42_T10148	TTN
4.12042	0.797962	5.1041	Q8WZ42_T33626	TTN
3.97341	0.92691	4.0394	Q8WZ42_T33631	TTN
1.6526	2.25269	1.71972	Q8WZ42_T886	TTN
3.42323	3.4245	4.6563	Q8WZ42_T9898	TTN
2.35522	0.848593	2.82831	Q96HC4_S111	PDLIM5
2.60903	1.16486	1.55791	Q9BX66_S556	SORBS1
2.93221	1.66417	3.04766	Q9BXK5_S426	BCL2L13
0.757967	-0.392418	0.549461	Q9BZQ8_S602	NIBAN1
-0.0644531	-0.614342	1.45082	Q9H7C4_T131	SYNC
1.41583	0.827692	1.97785	Q9H987_S108	SYNPO2L
0.586496	0.0666142	0.786829	Q9H987_S438	SYNPO2L
2.63706	-0.23624	3.46977	Q9NP98_S263	MYOZ1
1.09603	-0.288704	0.611929	Q9NP98_Y107	MYOZ1
1.05646	0.686247	1.22858	Q9UMS6_S604	SYNPO2
0.571297	0.487057	0.778019	Q9UMS6_S638	SYNPO2
0.53879	0.154303	1.46272	Q9UMS6_S705	SYNPO2
1.1048	0.931152	1.30658	Q9UMS6_S777	SYNPO2
2.68081	1.98238	2.99574	Q9UMS6_S781	SYNPO2
1.33058	0.238794	1.41142	Q9UMS6_S930	SYNPO2
0.806448	0.495911	1.00584	Q9UMS6_T626	SYNPO2
3.07037	0.944101	3.75341	Q9UMS6_T774	SYNPO2
2.92467	2.06534	2.70867	Q9Y4J8_S662	DTNA
1.23115	0.893368	2.86159	Q9Y613_S523	FHOD1

[truncated: 13 more sheets: Fig. 3F, Fig. 5A, Fig. 5B, Fig. 5C, Fig. S1, Fig. S3, Fig. S4, Fig. S5A, Fig. S5B, Fig. S5C, Fig. S5D, Fig. S6, Fig. S7]
